# Supplementary material for: Photochemical reaction on graphene surfaces controlled by substrate-surface modification with polar self-assembled monolayers
Source: Royal Society of Chemistry journal article supplement (doi:10.1039/c9cp05389a), 2019-12-11
Supplement: c9cp05389a2.xlsx [file c9cp05389a2.xlsx]

## Sheet: Figure 1
CH3 SAM				F SAM				Bare SiO2
Raman shift (cm-1)	Intensity (arb. unit)	Normalized intensity (arb. unit)		Raman shift (cm-1)	Intensity (arb. unit)	Normalized intensity (arb. unit)		Raman shift (cm-1)	Intensity (arb. unit)	Normalized intensity (arb. unit)
1141.55	35.5476	0.127383		1097.73	37.8333	0.107095		1231.34	17.9739	0.119309
1143.54	36.6667	0.131393		1099.73	38.1667	0.108038		1233.31	18.1373	0.120393
1145.53	37.0238	0.132673		1101.73	36	0.101905		1235.28	16.6536	0.110545
1147.52	35.2619	0.12636		1103.73	34.5	0.097659		1237.24	15.6536	0.103907
1149.51	31.7857	0.113903		1105.73	33.9167	0.0960078		1239.21	17.5098	0.116228
1151.5	30.6667	0.109893		1107.73	37.1111	0.10505		1241.18	15.5948	0.103517
1153.49	34.4524	0.123459		1109.73	35.5	0.10049		1243.14	15.8431	0.105165
1155.47	32.8571	0.117742		1111.73	38	0.107566		1245.11	16.5752	0.110024
1157.46	30.1667	0.108101		1113.72	36.4167	0.103085		1247.08	16.7255	0.111022
1159.45	31.6905	0.113562		1115.72	34.1944	0.0967941		1249.04	14.3856	0.0954903
1161.43	30.5238	0.109381		1117.72	34.0278	0.0963223		1251	15.915	0.105642
1163.42	30.1667	0.108101		1119.71	32	0.0905823		1252.97	15.7451	0.104514
1165.4	28.119	0.100763		1121.71	35.4167	0.100254		1254.93	16.0196	0.106337
1167.39	26.3333	0.0943644		1123.7	33.6389	0.0952215		1256.9	15.0719	0.100046
1169.37	29.0238	0.104006		1125.7	32.7778	0.0927839		1258.86	15.1699	0.100697
1171.35	25.1667	0.0901837		1127.69	31.6389	0.0895601		1260.82	14.634	0.097139
1173.34	26.881	0.0963268		1129.68	34.0556	0.0964009		1262.78	16.5163	0.109634
1175.32	28.0714	0.100593		1131.68	35.3056	0.0999393		1264.74	14.9935	0.0995252
1177.3	27.2857	0.0977772		1133.67	32.4444	0.0918404		1266.7	15.4771	0.102736
1179.28	27.381	0.0981185		1135.66	29.0556	0.0822474		1268.66	15.1699	0.100697
1181.26	27.3095	0.0978626		1137.65	33.3056	0.0942779		1270.62	15.8235	0.105035
1183.24	23.5	0.0842113		1139.64	31.0833	0.0879875		1272.58	13.5556	0.0899805
1185.22	25.0714	0.0898424		1141.63	29.25	0.0827979		1274.54	14.8824	0.0987876
1187.2	23.3571	0.0836994		1143.62	26.9722	0.0763502		1276.5	14.5033	0.0962713
1189.18	25.619	0.0918048		1145.61	27.25	0.0771365		1278.46	14.3007	0.0949263
1191.16	23.7381	0.0850645		1147.6	25.9444	0.0734408		1280.42	14.3464	0.09523
1193.14	27.619	0.0989717		1149.59	27.1389	0.0768219		1282.37	15.2876	0.101477
1195.12	26.1429	0.0936819		1151.58	27.0278	0.0765074		1284.33	15.4967	0.102866
1197.09	25.6667	0.0919754		1153.57	28.4444	0.0805176		1286.29	14.7843	0.0981368
1199.07	24.4286	0.0875388		1155.55	22.9167	0.0648701		1288.24	13.2745	0.0881149
1201.05	24.619	0.0882213		1157.54	26.3889	0.0746989		1290.2	12.9739	0.0861192
1203.02	23.5714	0.0844672		1159.53	27.2222	0.0770578		1292.15	13.6667	0.090718
1205	22.7143	0.0813957		1161.51	24.9722	0.0706888		1294.11	13.451	0.0892863
1206.97	24.2619	0.0869415		1163.5	24.5833	0.0695879		1296.06	14.3137	0.0950131
1208.95	25.5238	0.0914635		1165.48	25.75	0.0728904		1298.01	13.915	0.0923666
1210.92	23.2857	0.0834434		1167.47	21.7222	0.061489		1299.97	14.1503	0.0939285
1212.9	21.5238	0.0771297		1169.45	23.8056	0.0673863		1301.92	13.8954	0.0922365
1214.87	20.9286	0.0749967		1171.43	21.5	0.06086		1303.87	13.366	0.0887223
1216.84	24.2381	0.0868562		1173.42	21.25	0.0601523		1305.82	12.9935	0.0862493
1218.81	20.5476	0.0736315		1175.4	22.9167	0.0648701		1307.77	13.634	0.0905011
1220.79	19.7619	0.070816		1177.38	22.6111	0.0640052		1309.72	13.634	0.0905011
1222.76	22.0238	0.0789214		1179.36	24.0278	0.0680153		1311.67	14.5229	0.0964014
1224.73	21.1905	0.0759352		1181.34	18.4722	0.0522892		1313.62	13.7255	0.0911085
1226.7	20.4048	0.0731196		1183.32	19.6944	0.055749		1315.57	14.098	0.0935814
1228.67	20.7619	0.0743994		1185.3	21.1389	0.0598378		1317.52	14.4379	0.0958374
1230.64	19.619	0.070304		1187.28	22.4722	0.063612		1319.47	12.8497	0.0852949
1232.61	20.2381	0.0725224		1189.26	20.8333	0.0589728		1321.42	13.4641	0.0893731
1234.57	17.3095	0.062028		1191.24	20.6389	0.0584224		1323.36	13.1242	0.087117
1236.54	19.2143	0.0688536		1193.22	17.4444	0.0493799		1325.31	13.8693	0.0920629
1238.51	19.3571	0.0693655		1195.2	21.3889	0.0605454		1327.26	13.6863	0.0908482
1240.48	18.5952	0.0666353		1197.18	22.1667	0.0627471		1329.2	14.0588	0.0933211
1242.44	19.881	0.0712426		1199.15	19.5	0.0551986		1331.15	14.0261	0.0931042
1244.41	16.381	0.0587005		1201.13	20.6111	0.0583438		1333.09	13.3007	0.0882884
1246.38	18.8333	0.0674885		1203.1	17.25	0.0488295		1335.04	14.6275	0.0970956
1248.34	17.8095	0.0638197		1205.08	16	0.0452911		1336.98	15.0588	0.099959
1250.3	19.1905	0.0687683		1207.06	16.25	0.0459988		1338.93	15.7712	0.104688
1252.27	17.4524	0.0625399		1209.03	20.5	0.0580293		1340.87	14.7516	0.0979199
1254.23	17.881	0.0640757		1211	21.5278	0.0609386		1342.81	14.1503	0.0939285
1256.2	20.0238	0.0717545		1212.98	18.0556	0.0511098		1344.75	15.9739	0.106033
1258.16	15.5476	0.0557143		1214.95	15.3333	0.043404		1346.7	15.2941	0.101521
1260.12	20.6667	0.0740581		1216.92	18.3611	0.0519747		1348.64	14.7059	0.0976162
1262.08	18.381	0.0658674		1218.9	17.1111	0.0484364		1350.58	13.8889	0.0921931
1264.04	18.2381	0.0653555		1220.87	15.8333	0.0448194		1352.52	14.2288	0.0944491
1266.01	16	0.0573353		1222.84	20.25	0.0573216		1354.46	13.9804	0.0928005
1267.97	16.6905	0.0598096		1224.81	16.5556	0.0468637		1356.4	15	0.0995685
1269.93	17.1429	0.0614307		1226.78	18.4722	0.0522892		1358.34	14.6078	0.0969654
1271.89	18.9524	0.0679151		1228.75	18.1111	0.0512671		1360.28	15.183	0.100783
1273.84	16.2381	0.0581885		1230.72	14.9722	0.0423818		1362.21	13.085	0.0868567
1275.8	15.4762	0.0554583		1232.69	20.6389	0.0584224		1364.15	13.5621	0.0900238
1277.76	16.0714	0.0575913		1234.66	15.0278	0.0425391		1366.09	13.6275	0.0904577
1279.72	18.3095	0.0656114		1236.62	14.6111	0.0413596		1368.03	14.1895	0.0941888
1281.68	16.0952	0.0576766		1238.59	15	0.0424604		1369.96	13.1373	0.0872038
1283.63	18.2619	0.0654408		1240.56	17.4444	0.0493799		1371.9	12.9281	0.0858155
1285.59	15.5238	0.0556289		1242.53	16.8889	0.0478073		1373.83	13.3791	0.0888091
1287.55	17.5238	0.0627958		1244.49	14.6667	0.0415169		1375.77	14.4118	0.0956639
1289.5	16.9762	0.0608335		1246.46	15.0556	0.0426177		1377.7	12.8824	0.0855118
1291.46	15.381	0.055117		1248.42	15.75	0.0445835		1379.64	13.8562	0.0919762
1293.41	15.7143	0.0563115		1250.39	16.0556	0.0454484		1381.57	13.9739	0.0927571
1295.36	14.9762	0.0536666		1252.35	16.0833	0.045527		1383.5	13.5359	0.0898503
1297.32	17.5	0.0627105		1254.31	14.8333	0.0419887		1385.44	13.366	0.0887223
1299.27	16.3333	0.0585298		1256.28	15.5556	0.044033		1387.37	13.2549	0.0879847
1301.22	16.5238	0.0592124		1258.24	15.2222	0.0430895		1389.3	13.9346	0.0924968
1303.18	18	0.0645023		1260.2	14.3056	0.0404947		1391.23	14.6471	0.0972257
1305.13	16.119	0.0577619		1262.17	14.8056	0.04191		1393.16	14.366	0.0953602
1307.08	17.0238	0.0610041		1264.13	16.3889	0.046392		1395.09	14.5294	0.0964448
1309.03	14.4048	0.0516189		1266.09	13.3333	0.0377426		1397.02	12.7974	0.0849478
1310.98	17.0952	0.0612601		1268.05	11.5278	0.0326316		1398.95	11.9542	0.0793511
1312.93	16.119	0.0577619		1270.01	15.5	0.0438758		1400.88	12.6863	0.0842103
1314.88	17.4524	0.0625399		1271.97	12.3889	0.0350692		1402.81	13.8824	0.0921497
1316.83	16.9524	0.0607482		1273.93	13.1111	0.0371136		1404.74	13.7647	0.0913688
1318.78	15.4286	0.0552876		1275.89	15.1389	0.0428536		1406.67	13.3333	0.0885054
1320.73	17.5	0.0627105		1277.84	12.5833	0.0356196		1408.6	13.4314	0.0891561
1322.67	15.5714	0.0557996		1279.8	15.2778	0.0432467		1410.52	12.6732	0.0841235
1324.62	17.381	0.0622839		1281.76	13.3889	0.0378999		1412.45	12.9869	0.086206
1326.57	16.0476	0.057506		1283.72	17.6111	0.0498517		1414.37	13.2026	0.0876377
1328.51	17.5476	0.0628812		1285.67	13.0833	0.0370349		1416.3	13.085	0.0868567
1330.46	18.6667	0.0668912		1287.63	13.75	0.0389221		1418.22	13.4837	0.0895032
1332.4	16.7619	0.0600656		1289.58	13.9167	0.0393939		1420.15	14.2418	0.0945359
1334.35	16.4286	0.0588711		1291.54	14.4167	0.0408092		1422.07	13.4248	0.0891128
1336.29	16.6429	0.059639		1293.49	12.8333	0.0363273		1424	12.902	0.085642
1338.24	19.2143	0.0688536		1295.45	16.1944	0.0458416		1425.92	13.915	0.0923666
1340.18	18.1429	0.0650142		1297.4	12.3611	0.0349905		1427.84	14.0654	0.0933645
1342.12	20.7381	0.0743141		1299.35	13.9722	0.0395511		1429.77	13.817	0.0917159
1344.07	19.8571	0.0711573		1301.31	10.9167	0.0309018		1431.69	13.6536	0.0906312
1346.01	18.2619	0.0654408		1303.26	14.5556	0.0412024		1433.61	15.0588	0.099959
1347.95	18.1429	0.0650142		1305.21	17.1389	0.048515		1435.53	13.6471	0.0905878
1349.89	19.119	0.0685123		1307.16	12.75	0.0360914		1437.45	13.4379	0.0891995
1351.83	17.4524	0.0625399		1309.11	10.9444	0.0309804		1439.37	12.8431	0.0852515
1353.77	17.9762	0.0644169		1311.06	11.8056	0.0334179		1441.29	14.0196	0.0930608
1355.71	15.2857	0.0547757		1313.01	13.75	0.0389221		1443.21	15.3007	0.101564
1357.65	15.9524	0.0571647		1314.96	15.1944	0.0430109		1445.13	13.9673	0.0927137
1359.59	16.0952	0.0576766		1316.91	16.1111	0.0456057		1447.05	13.8105	0.0916725
1361.53	16.1667	0.0579326		1318.86	12.2778	0.0347547		1448.96	13.9346	0.0924968
1363.47	17.5714	0.0629665		1320.81	15.25	0.0431681		1450.88	12.9804	0.0861626
1365.4	16.4048	0.0587858		1322.76	14.0278	0.0397084		1452.8	14.2549	0.0946226
1367.34	15.7381	0.0563968		1324.7	14.8056	0.04191		1454.71	14.2745	0.0947528
1369.28	19.5952	0.0702187		1326.65	13.5556	0.0383717		1456.63	13.634	0.0905011
1371.21	16.7381	0.0599803		1328.6	12.3333	0.0349119		1458.55	12.8758	0.0854684
1373.15	17.2619	0.0618573		1330.54	11.3889	0.0322385		1460.46	13.4118	0.089026
1375.08	16.0714	0.0575913		1332.49	12.3056	0.0348333		1462.38	13.0458	0.0865964
1377.02	16.0952	0.0576766		1334.43	16.8889	0.0478073		1464.29	13.5948	0.0902408
1378.95	16.8571	0.0604069		1336.38	17.0278	0.0482005		1466.2	13.9869	0.0928439
1380.89	16.6667	0.0597243		1338.32	14.6389	0.0414382		1468.12	11.9542	0.0793511
1382.82	18.4048	0.0659527		1340.26	12.8611	0.0364059		1470.03	11.5294	0.0765311
1384.75	20.0952	0.0720105		1342.21	16.6389	0.0470996		1471.94	13.4967	0.08959
1386.69	19.2619	0.0690242		1344.15	14.2778	0.040416		1473.85	12.0196	0.079785
1388.62	18.2857	0.0655261		1346.09	15.8889	0.0449766		1475.77	12.4771	0.0828219
1390.55	17.8095	0.0638197		1348.03	17.3333	0.0490654		1477.68	11.8627	0.0787437
1392.48	19.0238	0.068171		1349.97	14.2778	0.040416		1479.59	12.3203	0.0817807
1394.41	17.9048	0.064161		1351.91	17.4167	0.0493013		1481.5	12.0065	0.0796982
1396.34	18.2143	0.0652701		1353.86	14.6667	0.0415169		1483.41	11.9085	0.0790474
1398.27	17.6667	0.0633078		1355.79	13.4722	0.0381358		1485.32	13.0654	0.0867266
1400.2	15.5714	0.0557996		1357.73	16.5833	0.0469424		1487.23	12.6405	0.0839066
1402.13	15.9048	0.0569941		1359.67	16.1389	0.0456843		1489.13	13.0523	0.0866398
1404.06	17.381	0.0622839		1361.61	13.2222	0.0374281		1491.04	11.3399	0.0752729
1405.99	15.5952	0.0558849		1363.55	15.6944	0.0444262		1492.95	11.5294	0.0765311
1407.91	16.3571	0.0586151		1365.49	14.0278	0.0397084		1494.86	12.4248	0.0824749
1409.84	16.0238	0.0574207		1367.42	15.8056	0.0447407		1496.76	12.3137	0.0817373
1411.77	16.3571	0.0586151		1369.36	12.75	0.0360914		1498.67	12.2876	0.0815638
1413.69	15.5238	0.0556289		1371.3	11.3611	0.0321599		1500.58	11.268	0.0747957
1415.62	16.7143	0.059895		1373.23	13	0.036799		1502.48	12.183	0.0808696
1417.54	16.5952	0.0594684		1375.17	12.8333	0.0363273		1504.39	11.098	0.0736677
1419.47	16.4762	0.0590417		1377.1	15.7222	0.0445048		1506.29	11.7386	0.0779194
1421.39	17.5	0.0627105		1379.04	10.9167	0.0309018		1508.19	11.1176	0.0737979
1423.32	17.0952	0.0612601		1380.97	14.0278	0.0397084		1510.1	12.2092	0.0810431
1425.24	15.6667	0.0561409		1382.9	12.5	0.0353837		1512	11.7647	0.078093
1427.16	14.5714	0.0522161		1384.84	15.7778	0.0446621		1513.9	10.7778	0.0715418
1429.09	16.4048	0.0587858		1386.77	13.3889	0.0378999		1515.81	12.2418	0.0812601
1431.01	15.5714	0.0557996		1388.7	16.1389	0.0456843		1517.71	12.5948	0.0836029
1432.93	13.619	0.0488033		1390.63	13.8333	0.039158		1519.61	11.6928	0.0776157
1434.85	16.119	0.0577619		1392.57	13.7778	0.0390007		1521.51	12.7974	0.0849478
1436.77	16.2857	0.0583592		1394.5	15.6389	0.0442689		1523.41	11.6078	0.0770517
1438.69	17.9762	0.0644169		1396.43	14.5556	0.0412024		1525.31	11.5033	0.0763576
1440.61	14.7619	0.0528987		1398.36	13.5833	0.0384503		1527.21	11.7712	0.0781364
1442.53	17.8571	0.0639903		1400.29	13.2222	0.0374281		1529.11	12.4706	0.0827785
1444.45	17.4048	0.0623692		1402.21	12.5	0.0353837		1531.01	11.6144	0.0770951
1446.37	17.119	0.0613454		1404.14	13.1944	0.0373495		1532.91	11.2026	0.0743619
1448.29	18.5714	0.0665499		1406.07	11.3611	0.0321599		1534.8	12.5752	0.0834727
1450.21	20.3333	0.0728637		1408	14	0.0396297		1536.7	12.4118	0.0823881
1452.12	17.6429	0.0632225		1409.93	13.6667	0.0386862		1538.6	12.0196	0.079785
1454.04	18.381	0.0658674		1411.85	11.3056	0.0320026		1540.49	13.4771	0.0894598
1455.96	14.5476	0.0521308		1413.78	12.3056	0.0348333		1542.39	13.4706	0.0894165
1457.87	17.5476	0.0628812		1415.7	15.6667	0.0443476		1544.29	12.6405	0.0839066
1459.79	13.2857	0.0476088		1417.63	13.5	0.0382144		1546.18	13.3922	0.0888958
1461.7	19.7143	0.0706453		1419.55	15.2778	0.0432467		1548.08	13.1307	0.0871604
1463.62	17.6667	0.0633078		1421.48	10.25	0.0290146		1549.97	14.6471	0.0972257
1465.53	16.8095	0.0602362		1423.4	11.4722	0.0324744		1551.86	15.6405	0.10382
1467.44	15.9762	0.05725		1425.33	15.3056	0.0433254		1553.76	17.3203	0.11497
1469.36	17.1429	0.0614307		1427.25	14.1667	0.0401015		1555.65	20.5098	0.136142
1471.27	14.9524	0.0535812		1429.17	14.3333	0.0405733		1557.54	24.7647	0.164386
1473.18	14.619	0.0523868		1431.09	11.5278	0.0326316		1559.43	25.0784	0.166468
1475.09	15.9048	0.0569941		1433.02	13.2778	0.0375854		1561.33	21.8235	0.144862
1477	15.881	0.0569087		1434.94	14.8889	0.0421459		1563.22	20.2549	0.13445
1478.92	17.3095	0.062028		1436.86	15.9722	0.0452125		1565.11	20.5621	0.136489
1480.83	16.2619	0.0582739		1438.78	13.6667	0.0386862		1567	23.4771	0.155839
1482.74	13.0238	0.0466703		1440.7	13.75	0.0389221		1568.89	28.5425	0.189462
1484.65	16.619	0.0595537		1442.62	12.6389	0.0357769		1570.78	31.6797	0.210287
1486.55	15.5	0.0555436		1444.54	18	0.0509525		1572.67	36.5621	0.242696
1488.46	15.8095	0.0566528		1446.45	15.5833	0.0441117		1574.55	46.1503	0.306341
1490.37	16.1429	0.0578473		1448.37	13.9722	0.0395511		1576.44	54.3399	0.360703
1492.28	15.1429	0.0542638		1450.29	17.6944	0.0500876		1578.33	68.6797	0.455889
1494.19	12.381	0.0443666		1452.21	12.0833	0.0342042		1580.22	81.7843	0.542876
1496.09	16.3095	0.0584445		1454.12	18.1667	0.0514243		1582.1	102.248	0.678715
1498	15	0.0537519		1456.04	12.4444	0.0352264		1583.99	127.007	0.843057
1499.91	16.381	0.0587005		1457.96	14.5278	0.0411237		1585.88	150.412	0.998419
1501.81	13.381	0.0479501		1459.87	15.6389	0.0442689		1587.76	160.307	1.0641
1503.72	12.3333	0.044196		1461.79	13.5	0.0382144		1589.65	142.608	0.946617
1505.62	12.5238	0.0448786		1463.7	14.2778	0.040416		1591.53	109.739	0.728434
1507.53	15.9762	0.05725		1465.62	15.6667	0.0443476		1593.41	77.1373	0.51203
1509.43	15.7857	0.0565675		1467.53	14.0833	0.0398656		1595.3	54.1699	0.359575
1511.33	14.6429	0.0524721		1469.44	13.1111	0.0371136		1597.18	40.4575	0.268553
1513.24	10.0952	0.0361759		1471.35	11.9444	0.0338111		1599.06	32.9869	0.218964
1515.14	13.3095	0.0476941		1473.27	11.75	0.0332607		1600.95	26.6471	0.176881
1517.04	15.0714	0.0540078		1475.18	14	0.0396297		1602.83	21.7516	0.144385
1518.94	11.5238	0.0412951		1477.09	12.5556	0.035541		1604.71	19.9739	0.132585
1520.84	14.3095	0.0512776		1479	12	0.0339684		1606.59	18.3007	0.121478
1522.74	16.381	0.0587005		1480.91	12.6389	0.0357769		1608.47	16.6797	0.110718
1524.64	13.0476	0.0467556		1482.82	10.1111	0.0286215		1610.35	16.0196	0.106337
1526.54	11.2619	0.0403566		1484.73	11.0278	0.0312163		1612.23	14.3203	0.0950565
1528.44	13.2381	0.0474382		1486.64	13.3611	0.0378212		1614.11	14.3791	0.095447
1530.34	13.619	0.0488033		1488.55	11.2778	0.031924		1615.99	13.5556	0.0899805
1532.24	13.0714	0.0468409		1490.46	14.6111	0.0413596		1617.87	13.6209	0.0904143
1534.14	14.3095	0.0512776		1492.36	10.9167	0.0309018		1619.75	13.1699	0.0874207
1536.03	13.7619	0.0493152		1494.27	10.3611	0.0293292		1621.62	12.0065	0.0796982
1537.93	14.0952	0.0505097		1496.18	13.0833	0.0370349		1623.5	13.2418	0.087898
1539.83	14.4048	0.0516189		1498.09	13.0833	0.0370349		1625.38	12.9085	0.0856853
1541.72	14.5476	0.0521308		1499.99	13	0.036799		1627.25	13.8105	0.0916725
1543.62	14.2619	0.0511069		1501.9	12.1944	0.0345188		1629.13	13.5229	0.0897635
1545.52	15.5	0.0555436		1503.8	11.0278	0.0312163		1631.01	12.6078	0.0836896
1547.41	15.3095	0.054861		1505.71	13.6389	0.0386075		1632.88	12.1765	0.0808262
1549.31	18.7857	0.0673178		1507.61	12.2222	0.0345974		1634.75	12.7778	0.0848176
1551.2	17.7381	0.0635637		1509.52	10.5278	0.0298009		1636.63	11.6275	0.0771819
1553.09	21	0.0752526		1511.42	14.5	0.0410451		1638.5	11.2614	0.0747523
1554.99	24.5476	0.0879654		1513.32	11.0556	0.0312949		1640.38	11.0327	0.0732339
1556.88	24.7619	0.0887333		1515.22	12.2778	0.0347547		1642.25	10.366	0.0688086
1558.77	30.8095	0.110405		1517.13	13.3889	0.0378999		1644.12	11.0784	0.0735375
1560.66	29.6429	0.106224		1519.03	9.77778	0.0276779		1645.99	11.0523	0.073364
1562.55	22.6905	0.0813104		1520.93	13	0.036799		1647.86	12.183	0.0808696
1564.44	26.3333	0.0943644		1522.83	12.0833	0.0342042		1649.73	10.8824	0.072236
1566.34	27.5952	0.0988864		1524.73	11.0833	0.0313735		1651.61	8.54902	0.0567476
1568.23	29.7381	0.106565		1526.63	12.8889	0.0364845		1653.48	10.3791	0.0688954
1570.11	33.6667	0.120643		1528.53	10.4444	0.029565		1655.35	10.4706	0.0695027
1572	43.5952	0.156222		1530.43	11.6667	0.0330248		1657.21	11.1438	0.0739714
1573.89	50.4762	0.180879		1532.33	12.1667	0.0344401		1659.08	9.44444	0.0626913
1575.78	65.8333	0.235911		1534.22	10.5556	0.0298796		1660.95	10.549	0.0700234
1577.67	84.619	0.303229		1536.12	13.5278	0.038293		1662.82	9.47712	0.0629082
1579.56	107.976	0.386928		1538.02	11.6944	0.0331034		1664.69	9.68627	0.0642965
1581.44	146.405	0.524635		1539.92	7.55556	0.0213875		1666.55	9.9085	0.0657716
1583.33	193.714	0.694167		1541.81	13.4167	0.0379785		1668.42	10.8693	0.0721492
1585.22	243.69	0.873255		1543.71	12.6944	0.0359341		1670.29	9.99346	0.0663356
1587.1	279.952	1.0032		1545.6	12.5556	0.035541		1672.15	11.2288	0.0745354
1588.99	276.286	0.990058		1547.5	13.4722	0.0381358		1674.02	10.0523	0.0667261
1590.87	217.095	0.777952		1549.39	11.5556	0.0327103		1675.88	10.4641	0.0694594
1592.76	152.929	0.548013		1551.29	15.7222	0.0445048		1677.75	9.55556	0.0634288
1594.64	102.667	0.367902		1553.18	13.5	0.0382144		1679.61	10.4444	0.0693292
1596.52	70.6429	0.253146		1555.07	16.8889	0.0478073		1681.48	10.2484	0.0680277
1598.41	52.3571	0.18762		1556.97	23.3889	0.0662068		1683.34	10.549	0.0700234
1600.29	39.9048	0.142997		1558.86	22.5	0.0636907		1685.2	10.4314	0.0692424
1602.17	34.7857	0.124653		1560.75	19.4167	0.0549627		1687.06	9.47059	0.0628648
1604.05	30.619	0.109722		1562.64	14.5833	0.041281		1688.93	9.77778	0.0649039
1605.93	27	0.0967534		1564.53	13.0833	0.0370349		1690.79	9.02614	0.0599147
1607.81	22.0714	0.0790921		1566.42	16.25	0.0459988		1692.65	9.64052	0.0639929
1609.69	21.9048	0.0784948		1568.31	18.8333	0.0533114		1694.51	10.3595	0.0687652
1611.57	17.1905	0.0616014		1570.2	20.4722	0.0579506		1696.37	9.7451	0.064687
1613.45	19.9048	0.0713279		1572.09	19.0556	0.0539405		1698.23	11.085	0.0735809
1615.33	17.3095	0.062028		1573.98	22.9167	0.0648701		1700.09	10.9281	0.0725397
1617.21	18.1667	0.0650995		1575.87	25.5833	0.0724186		1701.95	10.2484	0.0680277
1619.09	17.2381	0.061772		1577.76	29.5833	0.0837414		1703.81	9.58824	0.0636458
1620.97	15.5714	0.0557996		1579.64	37.6944	0.106702		1705.66	11.3072	0.075056
1622.85	16.9762	0.0608335		1581.53	46.4167	0.131391		1707.52	9.65359	0.0640796
1624.72	15.119	0.0541785		1583.42	60.7222	0.171886		1709.38	10.634	0.0705874
1626.6	13.5714	0.0486327		1585.3	74.9722	0.212224		1711.24	9.28105	0.0616067
1628.47	15.5238	0.0556289		1587.19	117.194	0.331742		1713.09	10.7908	0.0716286
1630.35	16.4048	0.0587858		1589.07	186.083	0.526745		1714.95	10.3856	0.0689387
1632.23	12.7857	0.0458171		1590.96	298.167	0.844019		1716.8	10.7582	0.0714117
1634.1	14	0.0501684		1592.84	350.056	0.990901		1718.66	11.366	0.0754465
1635.97	15.8095	0.0566528		1594.73	296.333	0.83883		1720.51	10.3987	0.0690255
1637.85	13.1429	0.0470969		1596.61	189.111	0.535316		1722.37	11.366	0.0754465
1639.72	14.119	0.050595		1598.49	104.917	0.296987		1724.22	10.3072	0.0684181
1641.59	14.3095	0.0512776		1600.38	63.1111	0.178648		1726.07	10.7124	0.071108
1643.47	15.1429	0.0542638		1602.26	40.3611	0.11425		1727.93	10.7059	0.0710646
1645.34	12.6667	0.0453905		1604.14	32.4444	0.0918404		1729.78	10.0261	0.0665526
1647.21	11.6667	0.041807		1606.02	24.8889	0.0704529		1731.63	10.9608	0.0727566
1649.08	13.5952	0.048718		1607.9	21.5556	0.0610172		1733.48	11.549	0.0766613
1650.95	16.2619	0.0582739		1609.78	18.0278	0.0510312		1735.33	10.9477	0.0726698
1652.82	13.5	0.0483767		1611.66	15.4167	0.0436399		1737.19	10.9739	0.0728434
1654.69	12.4048	0.044452		1613.54	16.3056	0.0461561		1739.04	11.183	0.0742317
1656.56	13.5238	0.048462		1615.42	13.1111	0.0371136		1740.89	10.3072	0.0684181
1658.43	12.6667	0.0453905		1617.3	16.9444	0.0479646		1742.73	10.2026	0.067724
1660.3	13.4286	0.0481207		1619.18	11.6667	0.0330248		1744.58	9.70588	0.0644267
1662.17	13.9048	0.0498271		1621.06	14.6944	0.0415955		1746.43	10.549	0.0700234
1664.04	16.0714	0.0575913		1622.93	12.6111	0.0356982		1748.28	11.6928	0.0776157
1665.9	15.8095	0.0566528		1624.81	12.5278	0.0354623		1750.13	12.183	0.0808696
1667.77	10.1667	0.0364318		1626.69	13.1667	0.0372708		1751.98	11.0065	0.0730603
1669.64	12.7857	0.0458171		1628.56	12.25	0.034676		1753.82	10.0588	0.0667695
1671.5	10.4524	0.0374557		1630.44	14.3611	0.0406519		1755.67	10.3725	0.068852
1673.37	11.7857	0.0422336		1632.31	12.6111	0.0356982		1757.52	10.8235	0.0718455
1675.23	11.1905	0.0401006		1634.19	11.5556	0.0327103		1759.36	11.1046	0.0737111
1677.1	11.6429	0.0417217		1636.06	14.1667	0.0401015		1761.21	11.2614	0.0747523
1678.96	11.5	0.0412098		1637.94	10.9167	0.0309018		1763.05	10.7255	0.0711948
1680.83	14.4762	0.0518748		1639.81	12.6111	0.0356982		1764.9	10.7451	0.0713249
1682.69	11.5476	0.0413804		1641.68	10.75	0.03043		1766.74	10.9542	0.0727132
1684.55	14.0476	0.0503391		1643.56	11.5833	0.0327889		1768.58	10.7647	0.0714551
1686.42	14.1667	0.0507657		1645.43	12.7222	0.0360127		1770.43	10.1373	0.0672901
1688.28	10.6667	0.0382236		1647.3	12.8056	0.0362486		1772.27	10.5752	0.0701969
1690.14	13.7143	0.0491446		1649.17	8.86111	0.0250831		1774.11	9.50327	0.0630818
1692	12.0476	0.0431721		1651.04	10.4167	0.0294864		1775.95	11.2745	0.0748391
1693.86	11.1905	0.0401006		1652.91	10.5556	0.0298796		1777.79	11.098	0.0736677
1695.72	12.7381	0.0456464		1654.78	10.3056	0.0291719		1779.63	11.0065	0.0730603
1697.58	11.9286	0.0427455		1656.65	10.8889	0.0308231		1781.48	10.9739	0.0728434
1699.44	13.0952	0.0469262		1658.52	10.4444	0.029565		1783.32	10.9542	0.0727132
1701.3	11.5476	0.0413804		1660.39	8.72222	0.02469		1785.16	10.6993	0.0710212
1703.16	13.5952	0.048718		1662.26	9.36111	0.0264985		1786.99	10.085	0.066943
1705.02	11.3333	0.0406125		1664.12	10.5833	0.0299582		1788.83	11.5752	0.0768348
1706.88	11.119	0.0398446		1665.99	12.1389	0.0343615		1790.67	9.86928	0.0655113
1708.73	10.0476	0.0360052		1667.86	9.36111	0.0264985		1792.51	10.6993	0.0710212
1710.59	12.4762	0.0447079		1669.73	9.08333	0.0257122		1794.35	9.62092	0.0638627
1712.45	11.0476	0.0395887		1671.59	11.5	0.032553		1796.18	9.0915	0.0603485
1714.3	13.5714	0.0486327		1673.46	12.0556	0.0341256		1798.02	9.80392	0.0650775
1716.16	13.4048	0.0480354		1675.32	8.94444	0.025319		1799.86	10.085	0.066943
1718.01	11.7381	0.042063		1677.19	9.41667	0.0266557		1801.69	11.183	0.0742317
1719.87	11.5476	0.0413804		1679.05	10	0.028307		1803.53	10.3529	0.0687218
1721.72	14.2619	0.0511069		1680.92	11.8333	0.0334966		1805.36	10.8824	0.072236
1723.58	12.2619	0.04394		1682.78	10.5278	0.0298009		1807.2	9.20261	0.0610861
1725.43	14.7143	0.052728		1684.64	5.77778	0.0163551		1809.03	10.7974	0.071672
1727.28	13.1905	0.0472675		1686.5	13.0556	0.0369563		1810.87	10.0327	0.0665959
1729.14	10.4286	0.0373704		1688.37	9.08333	0.0257122		1812.7	9.79739	0.0650341
1730.99	12.6429	0.0453052		1690.23	9.69444	0.027442		1814.53	10.0196	0.0665092
1732.84	10.2857	0.0368584		1692.09	10.6944	0.0302727		1816.37	10.1503	0.0673769
1734.69	13.9762	0.0500831		1693.95	7.61111	0.0215447		1818.2	9.24183	0.0613464
1736.54	10.4762	0.037541		1695.81	9.80556	0.0277565		1820.03	9.94118	0.0659886
1738.39	14.4286	0.0517042		1697.67	8.80556	0.0249259		1821.86	8.71242	0.0578322
1740.24	15.7857	0.0565675		1699.53	10.0278	0.0283856		1823.69	10.3529	0.0687218
1742.09	10.7857	0.0386502		1701.39	12.3889	0.0350692		1825.52	9.75817	0.0647738
1743.94	13.8333	0.0495712		1703.25	10.5833	0.0299582		1827.35	9.66667	0.0641664
1745.79	14.2857	0.0511923		1705.11	7.38889	0.0209157		1829.18	10.1569	0.0674203
1747.64	15.6429	0.0560555		1706.96	11.1111	0.0314522		1831.01	10.183	0.0675938
1749.49	14.381	0.0515335		1708.82	10.7222	0.0303514		1832.84	9.96078	0.0661187
1751.34	12.0476	0.0431721		1710.68	12.9722	0.0367204		1834.67	10.4575	0.069416
1753.18	12.381	0.0443666		1712.54	9.83333	0.0278352		1836.5	10.9281	0.0725397
1755.03	11.5238	0.0412951		1714.39	10.6111	0.0300368		1838.32	10.7974	0.071672
1756.88	12.119	0.0434281		1716.25	8.41667	0.023825		1840.15	10.4118	0.0691123
1758.72	12.5714	0.0450492		1718.1	10.0556	0.0284642		1841.98	10.9477	0.0726698
1760.57	13.5	0.0483767		1719.96	10.8333	0.0306659		1843.8	10.1765	0.0675504
1762.41	12.2857	0.0440254		1721.81	13.0833	0.0370349		1845.63	10.9739	0.0728434
1764.26	10.8571	0.0389061		1723.67	12.1667	0.0344401		1847.45	12.1699	0.0807828
1766.1	15.3095	0.054861		1725.52	10.4722	0.0296437		1849.28	11.0654	0.0734508
1767.94	11.5714	0.0414657		1727.37	10.5556	0.0298796		1851.1	10.3856	0.0689387
1769.79	13.5238	0.048462		1729.23	9.38889	0.0265771		1852.93	11.2353	0.0745788
1771.63	9.28571	0.033275		1731.08	11	0.0311377		1854.75	11.0784	0.0735375
1773.47	11.9524	0.0428309		1732.93	8.83333	0.0250045		1856.57	11.4118	0.0757502
1775.31	13.1429	0.0470969		1734.78	8.5	0.0240609		1858.4	10.8758	0.0721926
1777.16	12.9048	0.0462437		1736.63	9.86111	0.0279138		1860.22	11.5556	0.0767047
1779	14	0.0501684		1738.48	8	0.0226456		1862.04	10.7386	0.0712815
1780.84	11.6905	0.0418923		1740.33	10.8056	0.0305872		1863.86	12.1307	0.0805225
1782.68	12.6667	0.0453905		1742.18	10.5	0.0297223		1865.68	11.2353	0.0745788
1784.52	11.7143	0.0419777		1744.03	9.58333	0.0271275		1867.5	10.366	0.0688086
1786.36	9.83333	0.0352373		1745.88	11.6389	0.0329462		1869.33	11.3529	0.0753597
1788.2	13.7381	0.0492299		1747.73	11.5556	0.0327103		1871.15	12.3203	0.0817807
1790.04	13.7857	0.0494005		1749.58	11.7222	0.033182		1872.96	11.3595	0.0754031
1791.87	13.6905	0.0490593		1751.43	12.8611	0.0364059		1874.78	11.1961	0.0743185
1793.71	14.0476	0.0503391		1753.27	9.13889	0.0258694		1876.6	11.3399	0.0752729
1795.55	12.9762	0.0464996		1755.12	10.0833	0.0285429		1878.42	11.2941	0.0749693
1797.39	12.7143	0.0455611		1756.97	9.75	0.0275993		1880.24	10.6928	0.0709778
1799.22	10.9762	0.0393327		1758.81	8.52778	0.0241395		1882.06	10.9935	0.0729735
1801.06	11.5714	0.0414657		1760.66	9.33333	0.0264198		1883.87	11.634	0.0772253
1802.89	13.119	0.0470116		1762.5	12	0.0339684		1885.69	11.3399	0.0752729
1804.73	11.4524	0.0410391		1764.35	9.5	0.0268916		1887.51	10.0915	0.0669864
1806.56	12.9762	0.0464996		1766.19	9.94444	0.0281497		1889.32	10.5882	0.0702837
1808.4	12.4286	0.0445373		1768.03	9.02778	0.0255549		1891.14	9.57516	0.063559
1810.23	10.381	0.0371997		1769.88	9.5	0.0268916		1892.95	11.634	0.0772253
1812.07	12.2381	0.0438547		1771.72	10.4167	0.0294864		1894.77	11.0915	0.0736243
1813.9	13.5714	0.0486327		1773.56	7.86111	0.0222524		1896.58	10.3595	0.0687652
1815.73	12.6905	0.0454758		1775.41	10.8056	0.0305872		1898.39	10.5621	0.0701101
1817.56	13.3571	0.0478648		1777.25	8.41667	0.023825		1900.21	10.0131	0.0664658
1819.4	12.6429	0.0453052		1779.09	9.88889	0.0279924		1902.02	10.2549	0.068071
1821.23	13	0.046585		1780.93	10.6111	0.0300368		1903.83	11.5621	0.076748
1823.06	14.5476	0.0521308		1782.77	9.72222	0.0275207		1905.64	10.0588	0.0667695
1824.89	11.2857	0.0404419		1784.61	10.1111	0.0286215		1907.46	11.8497	0.078657
1826.72	11.5476	0.0413804		1786.45	7.16667	0.0202867		1909.27	10.5686	0.0701535
1828.55	13.0952	0.0469262		1788.29	8.02778	0.0227242		1911.08	10.5033	0.0697197
1830.38	12.5714	0.0450492		1790.13	11.0833	0.0313735		1912.89	11.1046	0.0737111
1832.21	12.881	0.0461584		1791.96	9.72222	0.0275207		1914.7	9.67974	0.0642532
1834.04	11.2143	0.0401859		1793.8	8.72222	0.02469		1916.51	10.0196	0.0665092
1835.86	14.7381	0.0528134		1795.64	11.3056	0.0320026		1918.32	10.3072	0.0684181
1837.69	13.8095	0.0494859		1797.48	9.16667	0.025948		1920.13	9.93464	0.0659452
1839.52	11.5238	0.0412951		1799.31	9.97222	0.0282283		1921.93	10.2484	0.0680277
1841.35	13.4048	0.0480354		1801.15	10.7222	0.0303514		1923.74	10.0588	0.0667695
1843.17	13.8571	0.0496565		1802.99	10	0.028307		1925.55	9.9281	0.0659018
1845	12.3333	0.044196		1804.82	10.6944	0.0302727		1927.36	9.55556	0.0634288
1846.82	13.2619	0.0475235		1806.66	9.94444	0.0281497		1929.16	9.56209	0.0634722
1848.65	11.9048	0.0426602		1808.49	11.75	0.0332607		1930.97	8.59477	0.0570513
1850.47	14.2381	0.0510216		1810.32	10.9444	0.0309804		1932.78	9.67974	0.0642532
1852.3	16.2381	0.0581885		1812.16	9.83333	0.0278352		1934.58	9.42484	0.0625611
1854.12	15.0714	0.0540078		1813.99	10.1389	0.0287001		1936.39	9.30719	0.0617802
1855.95	12.5	0.0447932		1815.82	8.5	0.0240609		1938.19	9.88235	0.0655981
1857.77	16.7619	0.0600656		1817.66	8.55556	0.0242182		1939.99	10.3399	0.068635
1859.59	16.8333	0.0603216		1819.49	12.0833	0.0342042		1941.8	10.9804	0.0728868
1861.41	15.1429	0.0542638		1821.32	8.66667	0.0245327		1943.6	11.2288	0.0745354
1863.24	17.8095	0.0638197		1823.15	8	0.0226456		1945.4	10.7908	0.0716286
1865.06	16.3571	0.0586151		1824.98	13	0.036799		1947.21	9.94771	0.0660319
1866.88	15.2619	0.0546904		1826.81	8.91667	0.0252404		1949.01	9.5817	0.0636024
1868.7	14.5	0.0519602		1828.64	13.4167	0.0379785		1950.81	10.0719	0.0668563
1870.52	15.0476	0.0539225		1830.47	11.8889	0.0336538		1952.61	10.3333	0.0685917
1872.34	14.1667	0.0507657		1832.3	10.5278	0.0298009		1954.41	10.8235	0.0718455
1874.16	13.3571	0.0478648		1834.13	10.7222	0.0303514		1956.21	9.78431	0.0649473
1875.98	12.9762	0.0464996		1835.96	9.55556	0.0270489		1958.01	10.6601	0.0707609
1877.79	13.7857	0.0494005		1837.78	9.75	0.0275993		1959.81	10.3595	0.0687652
1879.61	15.2857	0.0547757		1839.61	13.0833	0.0370349		1961.61	11.0392	0.0732772
1881.43	14.0476	0.0503391		1841.44	11.9722	0.0338897		1963.41	10.8693	0.0721492
1883.25	13.5	0.0483767		1843.26	10.25	0.0290146		1965.21	10.0196	0.0665092
1885.06	13.4762	0.0482914		1845.09	11.5	0.032553		1967.01	10.3856	0.0689387
1886.88	14.6429	0.0524721		1846.92	10.3056	0.0291719		1968.8	11.5359	0.0765745
1888.7	15.8571	0.0568234		1848.74	13.5	0.0382144		1970.6	9.56863	0.0635156
1890.51	15.2857	0.0547757		1850.57	12.3333	0.0349119		1972.4	9.96078	0.0661187
1892.33	13.3095	0.0476941		1852.39	8.91667	0.0252404		1974.19	10.3007	0.0683747
1894.14	13.4524	0.0482061		1854.21	11.4722	0.0324744		1975.99	11.1046	0.0737111
1895.96	12.7143	0.0455611		1856.04	10.9722	0.031059		1977.79	10.7843	0.0715852
1897.77	11.7143	0.0419777		1857.86	13.6667	0.0386862		1979.58	13.0784	0.0868134
1899.58	13.2619	0.0475235		1859.68	11.9167	0.0337325		1981.38	10.7516	0.0713683
1901.4	13.119	0.0470116		1861.51	11.2778	0.031924		1983.17	10.9477	0.0726698
1903.21	12.4286	0.0445373		1863.33	11.7778	0.0333393		1984.96	11.451	0.0760105
1905.02	12.4524	0.0446226		1865.15	10.2222	0.028936		1986.76	11.1634	0.0741016
1906.83	13.6429	0.0488886		1866.97	8.94444	0.025319		1988.55	10.0392	0.0666393
1908.65	13.0476	0.0467556		1868.79	14.9167	0.0422245		1990.34	11.1176	0.0737979
1910.46	14.6429	0.0524721		1870.61	8.25	0.0233532		1992.14	10.0196	0.0665092
1912.27	15.7857	0.0565675		1872.43	11.8056	0.0334179		1993.93	11.6928	0.0776157
1914.08	11.5476	0.0413804		1874.25	11.0833	0.0313735		1995.72	10.7843	0.0715852
1915.89	15.8571	0.0568234		1876.07	11.2778	0.031924		1997.51	10.8105	0.0717588
1917.7	14.5476	0.0521308		1877.89	12.9722	0.0367204		1999.3	9.51634	0.0631685
1919.5	11.5238	0.0412951		1879.71	11	0.0311377		2001.09	10.6405	0.0706308
1921.31	14.4524	0.0517895		1881.52	10.0556	0.0284642		2002.88	8.71242	0.0578322
1923.12	12.8571	0.046073		1883.34	11.2222	0.0317667		2004.67	9.98693	0.0662923
1924.93	11.4048	0.0408685		1885.16	9.36111	0.0264985		2006.46	10.0588	0.0667695
1926.74	12.381	0.0443666		1886.97	11.0833	0.0313735		2008.25	10.268	0.0681578
1928.54	12.2381	0.0438547		1888.79	8.94444	0.025319		2010.04	9	0.0597411
1930.35	11.8095	0.0423189		1890.61	8.55556	0.0242182		2011.82	10.1895	0.0676372
1932.16	12.7381	0.0456464		1892.42	11.2778	0.031924		2013.61	10.1895	0.0676372
1933.96	13.0952	0.0469262		1894.24	12	0.0339684		2015.4	10.5229	0.0698498
1935.77	11.1429	0.03993		1896.05	10.7222	0.0303514		2017.18	11.9804	0.0795247
1937.57	11.0952	0.0397593		1897.86	10.8333	0.0306659		2018.97	10.3137	0.0684615
1939.38	12.6905	0.0454758		1899.68	9.5	0.0268916		2020.76	10.3595	0.0687652
1941.18	12.5238	0.0448786		1901.49	11.0833	0.0313735		2022.54	10.366	0.0688086
1942.98	10.6905	0.0383089		1903.3	10.5833	0.0299582		2024.33	10.4641	0.0694594
1944.79	10.9286	0.0391621		1905.11	11.6111	0.0328675		2026.11	10.9281	0.0725397
1946.59	15.0238	0.0538372		1906.93	11.0833	0.0313735		2027.89	11.3333	0.0752296
1948.39	15.5238	0.0556289		1908.74	9.97222	0.0282283		2029.68	10.7647	0.0714551
1950.19	12.3095	0.0441107		1910.55	9.66667	0.0273634		2031.46	9.64706	0.0640362
1951.99	12.4524	0.0446226		1912.36	10.8056	0.0305872		2033.24	9.69281	0.0643399
1953.8	9.54762	0.0342135		1914.17	11.0556	0.0312949		2035.03	10.0261	0.0665526
1955.6	13.2619	0.0475235		1915.98	12.1667	0.0344401		2036.81	10.2745	0.0682012
1957.4	12.7857	0.0458171		1917.79	9.16667	0.025948		2038.59	9.24837	0.0613898
1959.2	12.881	0.0461584		1919.6	9.91667	0.0280711		2040.37	10.0131	0.0664658
1961	12.0238	0.0430868		1921.41	12.6667	0.0358555		2042.15	8.48366	0.0563137
1962.79	13.7143	0.0491446		1923.21	10.0833	0.0285429		2043.93	10.6144	0.0704572
1964.59	15.5476	0.0557143		1925.02	10.7222	0.0303514		2045.71	9.52288	0.0632119
1966.39	14.119	0.050595		1926.83	10.0556	0.0284642		2047.49	9.40523	0.062431
1968.19	12.7381	0.0456464		1928.64	9.16667	0.025948		2049.27	10.4118	0.0691123
1969.99	14.1905	0.050851		1930.44	9.19444	0.0260267		2051.05	10.9477	0.0726698
1971.78	13.8333	0.0495712		1932.25	11.5278	0.0326316		2052.83	10.8562	0.0720625
1973.58	11.9286	0.0427455		1934.05	8.58333	0.0242968		2054.61	10.268	0.0681578
1975.38	11.6905	0.0418923		1935.86	10.6667	0.0301941		2056.39	10.0327	0.0665959
1977.17	14.4524	0.0517895		1937.66	9.22222	0.0261053		2058.16	9.11111	0.0604787
1978.97	13.2143	0.0473528		1939.47	8.80556	0.0249259		2059.94	9.58824	0.0636458
1980.76	13.9524	0.0499978		1941.27	12.1389	0.0343615		2061.72	9.45752	0.0627781
1982.56	12.2857	0.0440254		1943.08	8.11111	0.0229601		2063.49	7.95425	0.0527995
1984.35	16.7619	0.0600656		1944.88	8.88889	0.0251617		2065.27	10.9804	0.0728868
1986.14	12.9762	0.0464996		1946.68	8.52778	0.0241395		2067.04	10.2484	0.0680277
1987.94	15.619	0.0559702		1948.48	11.4444	0.0323957		2068.82	10.1895	0.0676372
1989.73	15.4762	0.0554583		1950.29	12.1389	0.0343615		2070.59	10.2222	0.0678541
1991.52	16.2143	0.0581032		1952.09	10.4167	0.0294864		2072.37	9.03922	0.0600014
1993.32	13.5952	0.048718		1953.89	7.27778	0.0206012		2074.14	9.91503	0.065815
1995.11	15.1429	0.0542638		1955.69	12.9722	0.0367204		2075.91	9.80392	0.0650775
1996.9	12.9524	0.0464143		1957.49	8.88889	0.0251617		2077.69	8.59477	0.0570513
1998.69	14.0238	0.0502537		1959.29	12.1944	0.0345188		2079.46	9.66667	0.0641664
2000.48	12.7381	0.0456464		1961.09	8.88889	0.0251617		2081.23	8.8366	0.0586565
2002.27	12.9048	0.0462437		1962.89	8.47222	0.0239823		2083	9.39216	0.0623442
2004.06	12.8095	0.0459024		1964.69	9.66667	0.0273634		2084.77	8.8366	0.0586565
2005.85	14.119	0.050595		1966.49	6.61111	0.018714		2086.54	9.78431	0.0649473
2007.64	14.4762	0.0518748		1968.28	10.0833	0.0285429		2088.31	9.45098	0.0627347
2009.43	12.5952	0.0451345		1970.08	11.0278	0.0312163		2090.08	9.59477	0.0636892
2011.21	15	0.0537519		1971.88	13.1111	0.0371136		2091.85	9.5817	0.0636024
2013	12.119	0.0434281		1973.67	9.86111	0.0279138		2093.62	9.52941	0.0632553
2014.79	12.3095	0.0441107		1975.47	10.5278	0.0298009		2095.39	10	0.066379
2016.57	14.5714	0.0522161		1977.27	10.4444	0.029565		2097.16	10.0588	0.0667695
2018.36	11.1667	0.0400153		1979.06	11.6111	0.0328675		2098.93	9.62092	0.0638627
2020.15	14.4762	0.0518748		1980.86	10.0833	0.0285429		2100.69	10.6863	0.0709344
2021.93	9.42857	0.0337869		1982.65	11.0278	0.0312163		2102.46	9.8366	0.0652944
2023.72	12.1429	0.0435134		1984.45	10.5	0.0297223		2104.23	9.05882	0.0601316
2025.5	11.6667	0.041807		1986.24	9.75	0.0275993		2105.99	8.54902	0.0567476
2027.29	11.6667	0.041807		1988.03	11.7222	0.033182		2107.76	9.97386	0.0662055
2029.07	10.7857	0.0386502		1989.83	7.77778	0.0220165		2109.53	9.76471	0.0648172
2030.85	13.3571	0.0478648		1991.62	13.6111	0.0385289		2111.29	9.43791	0.0626479
2032.64	11.4048	0.0408685		1993.41	11.1667	0.0316094		2113.06	9.64052	0.0639929
2034.42	14.0476	0.0503391		1995.2	12.4722	0.0353051		2114.82	10.2157	0.0678107
2036.2	12.119	0.0434281		1996.99	10.6111	0.0300368		2116.58	8.18954	0.0543614
2037.98	13.9762	0.0500831		1998.78	11.5278	0.0326316		2118.35	9.5098	0.0631252
2039.77	12.3095	0.0441107		2000.57	10.25	0.0290146		2120.11	8.16993	0.0542312
2041.55	13.2619	0.0475235		2002.36	12.5	0.0353837		2121.87	9.24837	0.0613898
2043.33	12.9762	0.0464996		2004.15	10.0556	0.0284642		2123.64	9.78431	0.0649473
2045.11	11.9048	0.0426602		2005.94	10.1944	0.0288574		2125.4	9.01961	0.0598713
2046.89	10.9048	0.0390768		2007.73	11.0833	0.0313735		2127.16	8.69935	0.0577454
2048.67	13.2619	0.0475235		2009.52	11.4167	0.0323171		2128.92	9.83007	0.065251
2050.45	15.2619	0.0546904		2011.31	12.0833	0.0342042		2130.68	8.77778	0.058266
2052.22	10.2381	0.0366878		2013.1	10.6389	0.0301155		2132.44	9.32026	0.061867
2054	12.1667	0.0435987		2014.88	11.8056	0.0334179		2134.2	8.45752	0.0561402
2055.78	11.8333	0.0424043		2016.67	12.5833	0.0356196		2135.96	8.56863	0.0568777
2057.56	12.9524	0.0464143		2018.46	10.6111	0.0300368		2137.72	9.15033	0.060739
2059.33	11.7857	0.0422336		2020.24	11.5	0.032553		2139.48	9.40523	0.062431
2061.11	11.4524	0.0410391		2022.03	11.3333	0.0320812		2141.24	8.03922	0.0533635
2062.89	13.7619	0.0493152		2023.81	11.5278	0.0326316		2143	8.30065	0.0550989
2064.66	12.5714	0.0450492		2025.6	11.7778	0.0333393		2144.75	9.35294	0.0620839
2066.44	11.6905	0.0418923		2027.38	10.9722	0.031059		2146.51	9.82353	0.0652076
2068.21	13.1667	0.0471822		2029.17	9.13889	0.0258694		2148.27	8.0719	0.0535805
2069.99	12.2143	0.0437694		2030.95	10.9444	0.0309804		2150.02	9.04575	0.0600448
2071.76	14.381	0.0515335		2032.73	12.9167	0.0365632		2151.78	9.08497	0.0603051
2073.54	14.119	0.050595		2034.51	11.4167	0.0323171		2153.54	9.15686	0.0607824
2075.31	13.7857	0.0494005		2036.3	12.1944	0.0345188		2155.29	8.86928	0.0588734
2077.08	12.8571	0.046073		2038.08	9.91667	0.0280711		2157.05	8.6732	0.0575719
2078.86	11.619	0.0416364		2039.86	10.1667	0.0287787		2158.8	8	0.0531032
2080.63	12.119	0.0434281		2041.64	8.86111	0.0250831		2160.55	8.96078	0.0594808
2082.4	13.7381	0.0492299		2043.42	10.1944	0.0288574		2162.31	9.42484	0.0625611
2084.17	11.8333	0.0424043		2045.2	11.6667	0.0330248		2164.06	9.43791	0.0626479
2085.94	12.381	0.0443666		2046.98	11.0833	0.0313735		2165.81	8.51634	0.0565306
2087.71	13.7381	0.0492299		2048.76	9.75	0.0275993		2167.57	8.99346	0.0596977
2089.48	11.0238	0.0395034		2050.54	9.55556	0.0270489		2169.32	9.11111	0.0604787
2091.25	12.9048	0.0462437		2052.32	10.2778	0.0290933		2171.07	9.79085	0.0649907
2093.02	11.2381	0.0402713		2054.1	10.6111	0.0300368		2172.82	8.61438	0.0571814
2094.79	13.0238	0.0466703		2055.88	13.1389	0.0371922		2174.57	9.41176	0.0624744
2096.56	10.2619	0.0367731		2057.65	10.0833	0.0285429		2176.32	8.41176	0.0558365
2098.33	10.8095	0.0387355		2059.43	9.30556	0.0263412		2178.07	9.35948	0.0621273
2100.09	12.3571	0.0442813		2061.21	9.61111	0.0272061		2179.82	8.33333	0.0553159
2101.86	12.8333	0.0459877		2062.98	7.88889	0.022331		2181.57	9.31373	0.0618236
2103.63	12.1905	0.0436841		2064.76	12.7222	0.0360127		2183.32	8.59477	0.0570513
2105.4	13.2857	0.0476088		2066.53	10.1667	0.0287787		2185.07	8.37908	0.0556195
2107.16	11.7619	0.0421483		2068.31	9.5	0.0268916		2186.82	9.15033	0.060739
2108.93	11.1429	0.03993		2070.08	10.0278	0.0283856		2188.56	7.6732	0.050934
2110.69	9.97619	0.0357493		2071.86	9.94444	0.0281497		2190.31	9.12418	0.0605654
2112.46	10.3333	0.0370291		2073.63	10.1667	0.0287787		2192.06	9.13072	0.0606088
2114.22	12.1905	0.0436841		2075.41	10.6111	0.0300368		2193.8	8.70588	0.0577888
2115.99	10.8095	0.0387355		2077.18	7.75	0.0219379		2195.55	8.13725	0.0540143
2117.75	10.4762	0.037541		2078.95	12.1389	0.0343615		2197.3	8.96732	0.0595242
2119.51	11.1429	0.03993		2080.72	8.11111	0.0229601		2199.04	8.76471	0.0581793
2121.28	12.0952	0.0433428		2082.5	10.3333	0.0292505		2200.79	8.62092	0.0572248
2123.04	12.6905	0.0454758		2084.27	8.30556	0.0235105		2202.53	10.4706	0.0695027
2124.8	11	0.039418		2086.04	11.25	0.0318453		2204.28	8.19608	0.0544048
2126.56	11.5476	0.0413804		2087.81	10.0833	0.0285429		2206.02	8.62092	0.0572248
2128.32	11.9048	0.0426602		2089.58	10.0278	0.0283856		2207.76	9.20261	0.0610861
2130.09	12.0952	0.0433428		2091.35	8.77778	0.0248472		2209.51	8.95425	0.0594374
2131.85	12.1905	0.0436841		2093.12	10.5833	0.0299582		2211.25	9.68627	0.0642965
2133.61	11.5714	0.0414657		2094.89	9.83333	0.0278352		2212.99	8.8366	0.0586565
2135.37	12.8333	0.0459877		2096.66	10	0.028307		2214.73	8.71242	0.0578322
2137.13	9.59524	0.0343841		2098.42	11.7778	0.0333393		2216.47	10.1111	0.0671166
2138.88	11.119	0.0398446		2100.19	8.16667	0.0231174		2218.21	9.13072	0.0606088
2140.64	12.6667	0.0453905		2101.96	12.6111	0.0356982		2219.95	7.90196	0.0524524
2142.4	13.2857	0.0476088		2103.73	8.97222	0.0253976		2221.7	8.01307	0.05319
2144.16	13.9762	0.0500831		2105.49	10.3611	0.0293292		2223.43	8.79739	0.0583962
2145.92	10.3571	0.0371144		2107.26	10.6667	0.0301941		2225.17	9.10458	0.0604353
2147.67	14.1905	0.050851		2109.02	9.5	0.0268916		2226.91	9.62745	0.0639061
2149.43	9.28571	0.033275		2110.79	9.88889	0.0279924		2228.65	9.47712	0.0629082
2151.19	11.881	0.0425749		2112.55	10.25	0.0290146		2230.39	9.44444	0.0626913
2152.94	14.0952	0.0505097		2114.32	10.0556	0.0284642		2232.13	8.26797	0.054882
2154.7	12.2619	0.04394		2116.08	11.8611	0.0335752		2233.87	9.05229	0.0600882
2156.45	11.2381	0.0402713		2117.85	9.91667	0.0280711		2235.6	9.21569	0.0611728
2158.21	11.2143	0.0401859		2119.61	9.83333	0.0278352		2237.34	9.15033	0.060739
2159.96	10.7143	0.0383942		2121.37	10.8889	0.0308231		2239.08	8.79739	0.0583962
2161.71	11.881	0.0425749		2123.14	8.80556	0.0249259		2240.81	9.15033	0.060739
2163.47	10.6429	0.0381382		2124.9	9.02778	0.0255549		2242.55	9.31373	0.0618236
2165.22	10.8333	0.0388208		2126.66	13.0833	0.0370349		2244.28	9.50327	0.0630818
2166.97	11.5952	0.0415511		2128.42	8.22222	0.0232746		2246.02	8.08497	0.0536672
2168.73	12.2619	0.04394		2130.18	12	0.0339684		2247.75	8.30719	0.0551423
2170.48	8.80952	0.0315686		2131.94	7.36111	0.0208371		2249.48	8.84967	0.0587433
2172.23	11.619	0.0416364		2133.7	10.75	0.03043		2251.22	9.16993	0.0608691
2173.98	11.7381	0.042063		2135.46	10.1944	0.0288574		2252.95	9.43791	0.0626479
2175.73	11.5952	0.0415511		2137.22	10.8333	0.0306659		2254.68	10.3333	0.0685917
2177.48	11.3333	0.0406125		2138.98	9.86111	0.0279138		2256.42	8.5098	0.0564872
2179.23	10.6667	0.0382236		2140.74	10.9167	0.0309018		2258.15	9.67974	0.0642532
2180.98	11.1667	0.0400153		2142.5	6.52778	0.0184782		2259.88	8.94118	0.0593507
2182.73	11.7857	0.0422336		2144.26	9.72222	0.0275207		2261.61	10.1111	0.0671166
2184.48	10.6667	0.0382236		2146.01	9.86111	0.0279138		2263.34	8.7451	0.0580491
2186.23	11.6667	0.041807		2147.77	9.58333	0.0271275		2265.07	9.26797	0.0615199
2187.97	9.35714	0.0335309		2149.53	8.55556	0.0242182		2266.8	8.47712	0.0562703
2189.72	11.619	0.0416364		2151.28	9.02778	0.0255549		2268.53	8.22876	0.0546217
2191.47	11.8571	0.0424896		2153.04	7.66667	0.021702		2270.26	9.05229	0.0600882
2193.22	8.88095	0.0318245		2154.79	8.80556	0.0249259		2271.99	8.91503	0.0591771
2194.96	11.5952	0.0415511		2156.55	10.1944	0.0288574		2273.72	8.61438	0.0571814
2196.71	13.3571	0.0478648		2158.3	13.5556	0.0383717		2275.45	8.75163	0.0580925
2198.45	10.2619	0.0367731		2160.06	9.47222	0.026813		2277.17	9.33987	0.0619971
2200.2	11.8095	0.0423189		2161.81	9.16667	0.025948		2278.9	9.52941	0.0632553
2201.94	10.8333	0.0388208		2163.57	10.2222	0.028936		2280.63	8.84314	0.0586999
2203.69	10.8095	0.0387355		2165.32	8.27778	0.0234319		2282.36	8.69281	0.057702
2205.43	8.92857	0.0319952		2167.07	8.44444	0.0239037		2284.08	8.7451	0.0580491
2207.18	11.9048	0.0426602		2168.82	9.5	0.0268916		2285.81	9.15033	0.060739
2208.92	13	0.046585		2170.58	7.91667	0.0224097		2287.53	8.69281	0.057702
2210.66	10.381	0.0371997		2172.33	9.33333	0.0264198		2289.26	9.73856	0.0646436
2212.4	9.92857	0.0355786		2174.08	12.4722	0.0353051		2290.98	8.38562	0.0556629
2214.15	11.8571	0.0424896		2175.83	8.61111	0.0243754		2292.71	8.63399	0.0573116
2215.89	10.7143	0.0383942		2177.58	10.6389	0.0301155		2294.43	8.1634	0.0541878
2217.63	10.1667	0.0364318		2179.33	9.66667	0.0273634		2296.15	9.38562	0.0623008
2219.37	10.7143	0.0383942		2181.08	8.11111	0.0229601		2297.88	8.55556	0.0567909
2221.11	13.9048	0.0498271		2182.83	9.63889	0.0272848		2299.6	9.11111	0.0604787
2222.85	11.2619	0.0403566		2184.58	7.83333	0.0221738		2301.32	8.94118	0.0593507
2224.59	12.4286	0.0445373		2186.32	9.13889	0.0258694		2303.04	8.88235	0.0589602
2226.33	11.6429	0.0417217		2188.07	8.72222	0.02469		2304.77	8.60784	0.057138
2228.07	14.119	0.050595		2189.82	7.94444	0.0224883		2306.49	9.54902	0.0633855
2229.81	12.5	0.0447932		2191.57	10.6667	0.0301941		2308.21	8.9085	0.0591337
2231.54	12.0238	0.0430868		2193.31	10.0556	0.0284642		2309.93	8.58824	0.0570079
2233.28	12.4048	0.044452		2195.06	11.25	0.0318453		2311.65	8.77778	0.058266
2235.02	12.3095	0.0441107		2196.81	8.5	0.0240609		2313.37	9.05882	0.0601316
2236.76	14.4524	0.0517895		2198.55	7.88889	0.022331		2315.09	8.16993	0.0542312
2238.49	13.9048	0.0498271		2200.3	9.19444	0.0260267		2316.81	8.91503	0.0591771
2240.23	12.7857	0.0458171		2202.04	8.5	0.0240609		2318.52	9.30719	0.0617802
2241.96	12.6667	0.0453905		2203.79	9.72222	0.0275207		2320.24	7.90196	0.0524524
2243.7	14.0952	0.0505097		2205.53	8.27778	0.0234319		2321.96	9.71242	0.0644701
2245.43	11.2619	0.0403566		2207.27	8.5	0.0240609		2323.68	10.4183	0.0691557
2247.17	10.8095	0.0387355		2209.02	8.91667	0.0252404		2325.39	10.0784	0.0668996
2248.9	13.4286	0.0481207		2210.76	10.8056	0.0305872		2327.11	10.9412	0.0726265
2250.64	13.5	0.0483767		2212.5	9.41667	0.0266557		2328.83	14.7124	0.0976596
2252.37	12.2857	0.0440254		2214.24	12.4444	0.0352264		2330.54	21.902	0.145383
2254.1	13.5	0.0483767		2215.99	8.44444	0.0239037		2332.26	32.5359	0.21597
2255.84	11.3571	0.0406979		2217.73	9	0.0254763		2333.97	38.7908	0.25749
2257.57	10.1905	0.0365172		2219.47	11.4444	0.0323957		2335.69	28.6405	0.190113
2259.3	10.881	0.0389914		2221.21	8.25	0.0233532		2337.4	17.1699	0.113972
2261.03	8.88095	0.0318245		2222.95	8.38889	0.0237464		2339.11	8.78431	0.0583094
2262.76	12.1429	0.0435134		2224.69	10.3056	0.0291719		2340.83	8.56863	0.0568777
2264.49	11.9762	0.0429162		2226.43	9.80556	0.0277565		2342.54	9.22876	0.0612596
2266.22	11.5	0.0412098		2228.17	11.4167	0.0323171		2344.25	9.30065	0.0617368
2267.95	12.5714	0.0450492		2229.9	10.7222	0.0303514		2345.97	9.75163	0.0647304
2269.68	9.42857	0.0337869		2231.64	6.41667	0.0181636		2347.68	9.52288	0.0632119
2271.41	10.3571	0.0371144		2233.38	8.13889	0.0230387		2349.39	9.32026	0.061867
2273.14	12.1667	0.0435987		2235.12	8.22222	0.0232746		2351.1	8.94771	0.059394
2274.87	12.5476	0.0449639		2236.85	10.9444	0.0309804		2352.81	8.87582	0.0589168
2276.6	11.0238	0.0395034		2238.59	11.4444	0.0323957		2354.52	9.62745	0.0639061
2278.32	13.6667	0.0489739		2240.33	7.36111	0.0208371		2356.23	8.77778	0.058266
2280.05	11.619	0.0416364		2242.06	9.61111	0.0272061		2357.94	9.7451	0.064687
2281.78	7.64286	0.0273879		2243.8	9.02778	0.0255549		2359.65	9.23529	0.061303
2283.5	9.57143	0.0342988		2245.53	10.8333	0.0306659		2361.36	9.6732	0.0642098
2285.23	10.5476	0.037797		2247.27	9.30556	0.0263412		2363.07	9.20915	0.0611294
2286.96	12.3571	0.0442813		2249	9.63889	0.0272848		2364.78	10.098	0.0670298
2288.68	9.47619	0.0339575		2250.74	6.58333	0.0186354		2366.48	9.81699	0.0651642
2290.41	12.2143	0.0437694		2252.47	11.5	0.032553		2368.19	9.79085	0.0649907
2292.13	13.2381	0.0474382		2254.2	7.44444	0.021073		2369.9	9.0915	0.0603485
2293.85	10.6429	0.0381382		2255.93	10.6944	0.0302727		2371.6	9.26797	0.0615199
2295.58	13.0476	0.0467556		2257.67	9	0.0254763		2373.31	9.26797	0.0615199
2297.3	13.3095	0.0476941		2259.4	7.5	0.0212302		2375.02	10.1503	0.0673769
2299.02	13.7381	0.0492299		2261.13	9.27778	0.0262626		2376.72	9.38562	0.0623008
2300.75	11.6667	0.041807		2262.86	9.02778	0.0255549		2378.43	9.10458	0.0604353
2302.47	12.0476	0.0431721		2264.59	9.55556	0.0270489		2380.13	9.96732	0.0661621
2304.19	13.0238	0.0466703		2266.32	8.63889	0.0244541		2381.84	9.0719	0.0602184
2305.91	12.1905	0.0436841		2268.05	8.77778	0.0248472		2383.54	9.3268	0.0619104
2307.63	12.8571	0.046073		2269.78	11.6944	0.0331034		2385.24	9.59477	0.0636892
2309.35	13.7619	0.0493152		2271.51	10.0833	0.0285429		2386.95	9.50327	0.0630818
2311.07	12.1429	0.0435134		2273.24	8.36111	0.0236678		2388.65	9.20915	0.0611294
2312.79	13.7619	0.0493152		2274.97	9.97222	0.0282283		2390.35	9.84967	0.0653812
2314.51	12.3333	0.044196		2276.7	6.69444	0.0189499		2392.05	10.5556	0.0700667
2316.23	12.4524	0.0446226		2278.42	8.44444	0.0239037		2393.75	9.5817	0.0636024
2317.95	9.35714	0.0335309		2280.15	9.83333	0.0278352		2395.46	9.26797	0.0615199
2319.67	12.3571	0.0442813		2281.88	6.69444	0.0189499		2397.16	9.54248	0.0633421
2321.39	13.7143	0.0491446		2283.6	11.3056	0.0320026		2398.86	9.64706	0.0640362
2323.1	13.0476	0.0467556		2285.33	6.91667	0.019579		2400.56	10.0196	0.0665092
2324.82	13.5238	0.048462		2287.06	9.61111	0.0272061		2402.26	9.56209	0.0634722
2326.54	13.7619	0.0493152		2288.78	8.19444	0.023196		2403.96	9.73856	0.0646436
2328.25	16.2857	0.0583592		2290.51	9.58333	0.0271275		2405.66	10.6471	0.0706741
2329.97	23.5714	0.0844672		2292.23	9.97222	0.0282283		2407.35	9.11111	0.0604787
2331.68	35.1429	0.125933		2293.95	12	0.0339684		2409.05	11.1373	0.073928
2333.4	49.1905	0.176272		2295.68	6.80556	0.0192645		2410.75	9.49673	0.0630384
2335.11	39.5	0.141547		2297.4	9.25	0.0261839		2412.45	10.4575	0.069416
2336.83	22.8571	0.0819076		2299.12	9.80556	0.0277565		2414.14	10.4575	0.069416
2338.54	10.619	0.0380529		2300.85	8.97222	0.0253976		2415.84	10.366	0.0688086
2340.26	11.5	0.0412098		2302.57	11.75	0.0332607		2417.54	10.1307	0.0672467
2341.97	11.0238	0.0395034		2304.29	8.61111	0.0243754		2419.23	10.5359	0.0699366
2343.68	8.57143	0.0307154		2306.01	10.0833	0.0285429		2420.93	10.0784	0.0668996
2345.4	13.4048	0.0480354		2307.73	9.77778	0.0276779		2422.62	11.1961	0.0743185
2347.11	10.2143	0.0366025		2309.45	10.4444	0.029565		2424.32	10.5163	0.0698064
2348.82	12.3095	0.0441107		2311.17	10.3611	0.0293292		2426.01	11.5033	0.0763576
2350.53	11.5238	0.0412951		2312.89	7.83333	0.0221738		2427.71	10.4314	0.0692424
2352.24	10.0238	0.0359199		2314.61	7.44444	0.021073		2429.4	11.7843	0.0782231
2353.95	11.5	0.0412098		2316.33	8.41667	0.023825		2431.09	11.6013	0.0770083
2355.66	12.2619	0.04394		2318.05	9.88889	0.0279924		2432.79	11.281	0.0748825
2357.37	10.9286	0.0391621		2319.77	9.52778	0.0269702		2434.48	11.6993	0.0776591
2359.08	13.2381	0.0474382		2321.49	11.1111	0.0314522		2436.17	11.1699	0.0741449
2360.79	11.4524	0.0410391		2323.2	6.44444	0.0182423		2437.86	10.6797	0.0708911
2362.5	15.0952	0.0540932		2324.92	12	0.0339684		2439.55	13.5229	0.0897635
2364.21	11.8571	0.0424896		2326.64	10.75	0.03043		2441.25	14.1046	0.0936248
2365.92	11.3333	0.0406125		2328.35	12.1111	0.0342829		2442.94	13.6209	0.0904143
2367.62	12.3571	0.0442813		2330.07	20.9444	0.0592874		2444.63	14.6993	0.0975728
2369.33	12.6667	0.0453905		2331.79	25.1111	0.0710819		2446.32	14.8889	0.098831
2371.04	12.3095	0.0441107		2333.5	35.2222	0.0997034		2448.01	17.085	0.113408
2372.74	13.7619	0.0493152		2335.22	33.8056	0.0956933		2449.69	18.7712	0.124602
2374.45	13.381	0.0479501		2336.93	18.25	0.0516602		2451.38	19.5425	0.129721
2376.15	12.6667	0.0453905		2338.64	12.6389	0.0357769		2453.07	20.9869	0.139309
2377.86	14.2619	0.0511069		2340.36	9.27778	0.0262626		2454.76	23.1634	0.153756
2379.56	13	0.046585		2342.07	8.94444	0.025319		2456.45	22.549	0.149678
2381.27	11.1667	0.0400153		2343.78	7.72222	0.0218593		2458.13	23.2157	0.154103
2382.97	14.2619	0.0511069		2345.5	10.0833	0.0285429		2459.82	22.4314	0.148897
2384.68	12.9286	0.046329		2347.21	10.6111	0.0300368		2461.51	23.2614	0.154407
2386.38	15.8333	0.0567381		2348.92	7.83333	0.0221738		2463.19	22.7908	0.151283
2388.08	15.8333	0.0567381		2350.63	7.41667	0.0209943		2464.88	20.8301	0.138268
2389.79	14.0238	0.0502537		2352.34	7.58333	0.0214661		2466.57	20.5556	0.136446
2391.49	14.8095	0.0530693		2354.05	9.66667	0.0273634		2468.25	19.1307	0.126988
2393.19	13.5	0.0483767		2355.76	10.0556	0.0284642		2469.93	19.902	0.132107
2394.89	14.6667	0.0525574		2357.47	6.30556	0.0178491		2471.62	18.7516	0.124472
2396.59	15.5476	0.0557143		2359.18	9.19444	0.0260267		2473.3	17.2418	0.11445
2398.29	12.2857	0.0440254		2360.89	9.61111	0.0272061		2474.99	16.281	0.108072
2399.99	14.0476	0.0503391		2362.6	11.9167	0.0337325		2476.67	16.9608	0.112584
2401.69	12.4762	0.0447079		2364.31	9.47222	0.026813		2478.35	14.5752	0.0967485
2403.39	14.3095	0.0512776		2366.02	10.75	0.03043		2480.03	16.2157	0.107638
2405.09	13.9524	0.0499978		2367.72	8.30556	0.0235105		2481.72	15.0784	0.100089
2406.79	13.3571	0.0478648		2369.43	7.86111	0.0222524		2483.4	15.3922	0.102172
2408.49	13.3333	0.0477795		2371.14	9.25	0.0261839		2485.08	13.9346	0.0924968
2410.19	15.5714	0.0557996		2372.84	10.2778	0.0290933		2486.76	14.8889	0.098831
2411.88	12.4286	0.0445373		2374.55	11.5	0.032553		2488.44	13.366	0.0887223
2413.58	13.1667	0.0471822		2376.26	10.0556	0.0284642		2490.12	12.9739	0.0861192
2415.28	17.0952	0.0612601		2377.96	9.41667	0.0266557		2491.8	13.0915	0.0869001
2416.97	13.4286	0.0481207		2379.67	11.9444	0.0338111		2493.48	13.5163	0.0897201
2418.67	14.3333	0.0513629		2381.37	10.7222	0.0303514		2495.16	14.1307	0.0937983
2420.37	12.619	0.0452198		2383.07	9.02778	0.0255549		2496.84	13.5294	0.0898069
2422.06	13.8333	0.0495712		2384.78	11.1944	0.0316881		2498.52	13.3595	0.0886789
2423.76	15.7619	0.0564821		2386.48	8.75	0.0247686		2500.19	13.1111	0.0870303
2425.45	13.5476	0.0485473		2388.18	11.6389	0.0329462		2501.87	12.1046	0.080349
2427.15	14.9286	0.0534959		2389.89	10.3056	0.0291719		2503.55	12.1503	0.0806527
2428.84	13.0238	0.0466703		2391.59	9.97222	0.0282283		2505.23	12.3922	0.0822579
2430.53	12.5952	0.0451345		2393.29	12.6389	0.0357769		2506.9	12.3595	0.082041
2432.23	14.6905	0.0526427		2394.99	11.1111	0.0314522		2508.58	12.5948	0.0836029
2433.92	13.9048	0.0498271		2396.69	8.86111	0.0250831		2510.25	12.4118	0.0823881
2435.61	15.2381	0.0546051		2398.39	12.5	0.0353837		2511.93	11.5556	0.0767047
2437.3	17.3571	0.0621986		2400.09	11.7778	0.0333393		2513.6	12.2026	0.0809998
2438.99	14.5238	0.0520455		2401.79	11.8056	0.0334179		2515.28	11.6863	0.0775723
2440.69	19	0.0680857		2403.49	12.6944	0.0359341		2516.95	11.2092	0.0744052
2442.38	17.2619	0.0618573		2405.19	9.63889	0.0272848		2518.63	11.4706	0.0761406
2444.07	19.9762	0.0715839		2406.89	13.1111	0.0371136		2520.3	11.3725	0.0754899
2445.76	17.9524	0.0643316		2408.59	10.1667	0.0287787		2521.97	11.8758	0.0788305
2447.45	20.0238	0.0717545		2410.29	10.6944	0.0302727		2523.64	11.2157	0.0744486
2449.14	22.4286	0.0803719		2411.99	9.97222	0.0282283		2525.32	10.6144	0.0704572
2450.82	24.7619	0.0887333		2413.68	9.05556	0.0256335		2526.99	10.634	0.0705874
2452.51	27.9524	0.100166		2415.38	12.8333	0.0363273		2528.66	11.8954	0.0789607
2454.2	30.0238	0.107589		2417.08	11.3889	0.0322385		2530.33	11.2549	0.0747089
2455.89	33.4762	0.119961		2418.77	12.5556	0.035541		2532	9.98039	0.0662489
2457.58	34.0952	0.122179		2420.47	10.8056	0.0305872		2533.67	11.9542	0.0793511
2459.26	34.2857	0.122861		2422.16	10.4444	0.029565		2535.34	11.1307	0.0738846
2460.95	37.8571	0.13566		2423.86	10.8056	0.0305872		2537.01	10.8497	0.0720191
2462.64	35.4762	0.127127		2425.55	10.9167	0.0309018		2538.68	9.91503	0.065815
2464.32	36.1905	0.129687		2427.25	9.55556	0.0270489		2540.35	11.5033	0.0763576
2466.01	33.3571	0.119534		2428.94	11.6667	0.0330248		2542.02	10.4444	0.0693292
2467.69	31.7857	0.113903		2430.64	13	0.036799		2543.69	11.5882	0.0769216
2469.38	28.5	0.102129		2432.33	10.1944	0.0288574		2545.36	12.2092	0.0810431
2471.06	30.1667	0.108101		2434.02	14	0.0396297		2547.02	12.3268	0.0818241
2472.75	29.881	0.107077		2435.71	11.1667	0.0316094		2548.69	11.1373	0.073928
2474.43	27.9286	0.100081		2437.41	11.6667	0.0330248		2550.36	11.3987	0.0756634
2476.11	24.7619	0.0887333		2439.1	11.4167	0.0323171		2552.02	11.2549	0.0747089
2477.8	24.7857	0.0888186		2440.79	13.1944	0.0373495		2553.69	11.7778	0.0781797
2479.48	24.881	0.0891599		2442.48	13.2778	0.0375854		2555.36	10.9608	0.0727566
2481.16	23.4048	0.08387		2444.17	13.8889	0.0393152		2557.02	10.8758	0.0721926
2482.84	21.4286	0.0767884		2445.86	13.25	0.0375067		2558.69	10.3399	0.068635
2484.52	20.9524	0.075082		2447.55	15.9167	0.0450552		2560.35	11.1569	0.0740582
2486.21	22.119	0.0792627		2449.24	15.4167	0.0436399		2562.01	10.915	0.0724529
2487.89	21.5	0.0770444		2450.93	17.25	0.0488295		2563.68	12.2026	0.0809998
2489.57	22.5714	0.0808838		2452.62	19.0833	0.0540191		2565.34	11.2026	0.0743619
2491.25	18.3095	0.0656114		2454.3	20.5	0.0580293		2567	11.8366	0.0785702
2492.93	19.2857	0.0691096		2455.99	23.4167	0.0662855		2568.67	10.7647	0.0714551
2494.61	18	0.0645023		2457.68	24.1944	0.0684871		2570.33	12.0261	0.0798284
2496.28	19.5476	0.0700481		2459.37	26.8889	0.0761143		2571.99	11.9477	0.0793077
2497.96	17.2619	0.0618573		2461.05	28.6944	0.0812253		2573.65	11.5033	0.0763576
2499.64	15.5952	0.0558849		2462.74	25.5278	0.0722614		2575.31	10.7647	0.0714551
2501.32	18.1667	0.0650995		2464.43	25.3333	0.071711		2576.97	10.8301	0.0718889
2503	19.3333	0.0692802		2466.11	25.4167	0.0719469		2578.64	10.5359	0.0699366
2504.67	18.3095	0.0656114		2467.8	22.3889	0.0633761		2580.3	12.1503	0.0806527
2506.35	15.5	0.0555436		2469.48	21.6944	0.0614104		2581.96	11.9412	0.0792644
2508.03	20	0.0716692		2471.17	21.8611	0.0618822		2583.61	11.6275	0.0771819
2509.7	14.119	0.050595		2472.85	18.4722	0.0522892		2585.27	11.0458	0.0733206
2511.38	14.119	0.050595		2474.53	24.4722	0.0692734		2586.93	11.4248	0.075837
2513.05	18.2381	0.0653555		2476.22	19.3333	0.0547268		2588.59	11.6667	0.0774422
2514.73	15.8571	0.0568234		2477.9	18.9167	0.0535473		2590.25	11.3529	0.0753597
2516.4	14.7381	0.0528134		2479.58	16.5	0.0467065		2591.91	10.3856	0.0689387
2518.07	16.8571	0.0604069		2481.26	15.4167	0.0436399		2593.56	11.8235	0.0784834
2519.75	17.8095	0.0638197		2482.95	14.5833	0.041281		2595.22	11.6863	0.0775723
2521.42	17.2619	0.0618573		2484.63	17.9722	0.0508739		2596.88	12.7255	0.0844706
2523.09	15.881	0.0569087		2486.31	16.3056	0.0461561		2598.53	12.0131	0.0797416
2524.77	14.8095	0.0530693		2487.99	20.3889	0.0577147		2600.19	12.4052	0.0823447
2526.44	15.7381	0.0563968		2489.67	15.8889	0.0449766		2601.84	13.2549	0.0879847
2528.11	13.7619	0.0493152		2491.35	16.4722	0.0466279		2603.5	13.6013	0.0902841
2529.78	17.8571	0.0639903		2493.03	17.4444	0.0493799		2605.15	12.3595	0.082041
2531.45	16.9762	0.0608335		2494.71	16.2778	0.0460774		2606.81	14.183	0.0941454
2533.12	14.6667	0.0525574		2496.39	16.5	0.0467065		2608.46	12.9346	0.0858589
2534.79	16.8571	0.0604069		2498.07	16.2222	0.0459202		2610.11	14.1569	0.0939719
2536.46	16.4048	0.0587858		2499.74	13.5833	0.0384503		2611.77	13.7582	0.0913254
2538.13	15	0.0537519		2501.42	15.2222	0.0430895		2613.42	14.4248	0.0957507
2539.8	16.9048	0.0605775		2503.1	14.6944	0.0415955		2615.07	15.5948	0.103517
2541.47	16.7619	0.0600656		2504.78	15.0833	0.0426963		2616.73	14.2484	0.0945793
2543.14	15.5	0.0555436		2506.45	13.9167	0.0393939		2618.38	15.7516	0.104558
2544.81	15.4762	0.0554583		2508.13	12.1667	0.0344401		2620.03	16.8954	0.11215
2546.48	18.1667	0.0650995		2509.81	10.25	0.0290146		2621.68	16.3333	0.108419
2548.14	16.8571	0.0604069		2511.48	14.3056	0.0404947		2623.33	17.2941	0.114797
2549.81	16.0714	0.0575913		2513.16	12.25	0.034676		2624.98	18.6601	0.123864
2551.48	15.5476	0.0557143		2514.83	14.5833	0.041281		2626.63	19.0261	0.126294
2553.14	15.3571	0.0550317		2516.51	11.0833	0.0313735		2628.28	19.2941	0.128072
2554.81	16.8571	0.0604069		2518.18	13.0833	0.0370349		2629.93	20.9673	0.139179
2556.47	13.8333	0.0495712		2519.85	11.5	0.032553		2631.58	21.0458	0.1397
2558.14	15.0714	0.0540078		2521.53	10.9722	0.031059		2633.23	22.9477	0.152325
2559.8	14.8333	0.0531546		2523.2	15.8056	0.0447407		2634.87	24.6993	0.163952
2561.47	15.9048	0.0569941		2524.87	13.4444	0.0380571		2636.52	25.6144	0.170026
2563.13	14.7143	0.052728		2526.54	11.8889	0.0336538		2638.17	29.6667	0.196924
2564.8	15.9286	0.0570794		2528.22	13.1111	0.0371136		2639.82	31.1307	0.206643
2566.46	13.881	0.0497418		2529.89	10.5278	0.0298009		2641.46	33.5098	0.222435
2568.12	16.9524	0.0607482		2531.56	11.0278	0.0312163		2643.11	36.9412	0.245212
2569.78	15.8571	0.0568234		2533.23	12.1389	0.0343615		2644.75	41.0392	0.272414
2571.45	14.6667	0.0525574		2534.9	11.5278	0.0326316		2646.4	45.6471	0.303001
2573.11	15.1667	0.0543491		2536.57	11.8889	0.0336538		2648.05	51.6536	0.342872
2574.77	14.9286	0.0534959		2538.24	11.6944	0.0331034		2649.69	58	0.384998
2576.43	16.3571	0.0586151		2539.91	9.97222	0.0282283		2651.33	65.8693	0.437234
2578.09	14.4286	0.0517042		2541.58	11.8333	0.0334966		2652.98	70.6601	0.469035
2579.75	14.7857	0.052984		2543.24	10.6667	0.0301941		2654.62	81.3007	0.539666
2581.41	15.881	0.0569087		2544.91	14.8889	0.0421459		2656.27	94.5425	0.627564
2583.07	15.0238	0.0538372		2546.58	12.0556	0.0341256		2657.91	105.542	0.700581
2584.73	16.6667	0.0597243		2548.25	9.97222	0.0282283		2659.55	120.98	0.803056
2586.39	14.381	0.0515335		2549.91	12.5833	0.0356196		2661.19	138.542	0.919631
2588.05	15.1905	0.0544344		2551.58	10.7778	0.0305086		2662.84	159.791	1.06068
2589.71	14.881	0.0533253		2553.25	11.1667	0.0316094		2664.48	179.092	1.18879
2591.36	17.9524	0.0643316		2554.91	15.2222	0.0430895		2666.12	205.046	1.36107
2593.02	19.3333	0.0692802		2556.58	12.8056	0.0362486		2667.76	228.66	1.51782
2594.68	17.6429	0.0632225		2558.24	11.7222	0.033182		2669.4	255.582	1.69653
2596.33	15.2857	0.0547757		2559.91	11.2222	0.0317667		2671.04	278.725	1.85015
2597.99	16.881	0.0604922		2561.57	12.2778	0.0347547		2672.68	298.614	1.98217
2599.65	17.0238	0.0610041		2563.24	14.0278	0.0397084		2674.32	319.438	2.1204
2601.3	20.0238	0.0717545		2564.9	10.8333	0.0306659		2675.96	333.804	2.21576
2602.96	16.9286	0.0606628		2566.56	9.36111	0.0264985		2677.6	340.699	2.26153
2604.61	20.2143	0.0724371		2568.23	10.8611	0.0307445		2679.23	341.242	2.26513
2606.27	16.6429	0.059639		2569.89	10.4722	0.0296437		2680.87	332.922	2.2099
2607.92	18.7619	0.0672325		2571.55	9.94444	0.0281497		2682.51	323.49	2.1473
2609.57	20.1429	0.0721811		2573.21	13.8333	0.039158		2684.15	304.98	2.02443
2611.23	19.9048	0.0713279		2574.88	10.9722	0.031059		2685.78	288.614	1.91579
2612.88	20.4286	0.0732049		2576.54	12.8889	0.0364845		2687.42	262.824	1.7446
2614.53	20.2381	0.0725224		2578.2	11.1111	0.0314522		2689.06	238.889	1.58572
2616.19	19.3571	0.0693655		2579.86	12.2778	0.0347547		2690.69	213.922	1.41999
2617.84	22.119	0.0792627		2581.52	16.25	0.0459988		2692.33	192.366	1.27691
2619.49	22.6905	0.0813104		2583.18	12.0556	0.0341256		2693.96	168.843	1.12076
2621.14	22.6429	0.0811397		2584.84	14.4722	0.0409665		2695.6	148.052	0.982757
2622.79	24.5238	0.0878801		2586.5	13.5278	0.038293		2697.23	130.824	0.868394
2624.44	22.619	0.0810544		2588.15	14	0.0396297		2698.87	115.719	0.768131
2626.09	26.5	0.0949617		2589.81	12.6389	0.0357769		2700.5	100.373	0.666263
2627.74	28.4286	0.101873		2591.47	14	0.0396297		2702.13	87.2418	0.579103
2629.39	27.5476	0.0987158		2593.13	10.75	0.03043		2703.77	78.4902	0.52101
2631.04	28.7857	0.103152		2594.78	10.7222	0.0303514		2705.4	71.4248	0.474111
2632.69	28.619	0.102555		2596.44	12.1111	0.0342829		2707.03	61.1699	0.40604
2634.34	32.8571	0.117742		2598.1	13.25	0.0375067		2708.66	57.0719	0.378838
2635.98	32.4286	0.116206		2599.75	16.2222	0.0459202		2710.29	51.9673	0.344954
2637.63	36.5714	0.131052		2601.41	12.5278	0.0354623		2711.92	45.451	0.301699
2639.28	37.2381	0.133441		2603.06	14.5556	0.0412024		2713.56	40.9085	0.271547
2640.93	42.0476	0.150676		2604.72	12.4444	0.0352264		2715.19	38.2288	0.253759
2642.57	44.6905	0.160146		2606.37	14.3889	0.0407306		2716.82	34.9346	0.231893
2644.22	49.1429	0.176101		2608.03	16.9167	0.0478859		2718.45	32.2941	0.214365
2645.86	53.1905	0.190606		2609.68	13.25	0.0375067		2720.07	30.0261	0.199311
2647.51	57.2381	0.20511		2611.33	11.2222	0.0317667		2721.7	28.732	0.19072
2649.15	69.8571	0.25033		2612.99	13.1944	0.0373495		2723.33	26.1961	0.173887
2650.8	78.3571	0.28079		2614.64	15.8056	0.0447407		2724.96	24.4248	0.16213
2652.44	82.9524	0.297256		2616.29	13.8889	0.0393152		2726.59	22.4771	0.149201
2654.09	99.0476	0.354933		2617.94	14.6389	0.0414382		2728.22	22.1961	0.147335
2655.73	109.762	0.393327		2619.6	13.6944	0.0387648		2729.84	20.3856	0.135318
2657.37	130.524	0.467727		2621.25	16.5	0.0467065		2731.47	20.3399	0.135014
2659.02	150.19	0.538201		2622.9	14.8611	0.0420673		2733.1	19.7908	0.13137
2660.66	172.929	0.619682		2624.55	15.6111	0.0441903		2734.72	20.1765	0.133929
2662.3	198.31	0.710634		2626.2	14.7222	0.0416741		2736.35	17.4575	0.115881
2663.94	233.214	0.835714		2627.85	18.5556	0.0525251		2737.97	17.6275	0.117009
2665.58	267.69	0.959258		2629.5	19.8056	0.0560635		2739.6	16.0654	0.10664
2667.23	312.048	1.11821		2631.15	18.1389	0.0513457		2741.22	16.0523	0.106554
2668.87	347.143	1.24397		2632.8	19.6111	0.0555131		2742.85	14.8758	0.0987442
2670.51	400.476	1.43509		2634.44	20.7778	0.0588156		2744.47	15.4183	0.102345
2672.15	443.976	1.59097		2636.09	22.5278	0.0637693		2746.1	12.9935	0.0862493
2673.79	494.357	1.77151		2637.74	26.1389	0.0739913		2747.72	15.281	0.101434
2675.43	521.762	1.86971		2639.39	26.8333	0.075957		2749.34	13.2222	0.0877678
2677.06	552.548	1.98003		2641.03	29.4167	0.0832696		2750.96	13.1634	0.0873774
2678.7	556.262	1.99334		2642.68	28.3611	0.0802817		2752.59	13.1699	0.0874207
2680.34	561.976	2.01382		2644.33	32.1667	0.0910541		2754.21	13.1307	0.0871604
2681.98	540.548	1.93703		2645.97	31.2222	0.0883806		2755.83	11.9608	0.0793945
2683.62	513.357	1.83959		2647.62	37.7778	0.106937		2757.45	13.4837	0.0895032
2685.25	492.643	1.76537		2649.26	39.1944	0.110948		2759.07	13.0065	0.0863361
2686.89	447.952	1.60522		2650.91	43.6667	0.123607		2760.69	12.366	0.0820844
2688.53	405.571	1.45335		2652.55	48.8333	0.138232		2762.31	12.6667	0.0840801
2690.16	364.786	1.30719		2654.19	54.1389	0.153251		2763.93	12.1373	0.0805659
2691.8	324.833	1.16403		2655.84	61.9722	0.175425		2765.55	12.8954	0.0855986
2693.43	292.643	1.04867		2657.48	68.1111	0.192802		2767.17	11.7843	0.0782231
2695.07	254.905	0.913441		2659.12	75.1111	0.212617		2768.79	12.0523	0.0800019
2696.7	220.5	0.790153		2660.77	87.4444	0.247529		2770.41	11.7974	0.0783099
2698.34	189.286	0.678298		2662.41	97.0556	0.274735		2772.02	10.8039	0.0717154
2699.97	165.762	0.594001		2664.05	114.306	0.323564		2773.64	11.3595	0.0754031
2701.6	145.762	0.522332		2665.69	126.139	0.357061		2775.26	11.0458	0.0733206
2703.24	125.429	0.449468		2667.33	148.611	0.420673		2776.88	10.902	0.0723662
2704.87	112	0.401347		2668.97	169.333	0.479331		2778.49	11.4248	0.075837
2706.5	100.667	0.360735		2670.61	193.806	0.548605		2780.11	10.8562	0.0720625
2708.13	86.619	0.310396		2672.25	219.278	0.620709		2781.72	9.69935	0.0643833
2709.76	78.7381	0.282155		2673.89	255.306	0.722692		2783.34	10.5817	0.0702403
2711.4	73.0714	0.261848		2675.53	278.722	0.788978		2784.95	11.5359	0.0765745
2713.03	64.0238	0.229427		2677.17	312.861	0.885615		2786.57	10.915	0.0724529
2714.66	56.4762	0.20238		2678.81	352.222	0.997034		2788.18	10.2353	0.0679409
2716.29	55.5714	0.199138		2680.45	380.806	1.07794		2789.8	11.3333	0.0752296
2717.92	51.5	0.184548		2682.09	391.028	1.10688		2791.41	10.2745	0.0682012
2719.55	45.9524	0.164668		2683.72	405.806	1.14871		2793.02	11.4248	0.075837
2721.18	44.6667	0.160061		2685.36	401.389	1.13621		2794.64	11.2876	0.0749259
2722.81	41.6667	0.149311		2687	388.194	1.09886		2796.25	11.5098	0.076401
2724.43	35.9048	0.128663		2688.63	375.639	1.06332		2797.86	10.8431	0.0719757
2726.06	34.5238	0.123715		2690.27	349.083	0.988149		2799.47	10.3856	0.0689387
2727.69	32.9286	0.117998		2691.91	317.75	0.899454		2801.09	9.73856	0.0646436
2729.32	30.619	0.109722		2693.54	284.278	0.804704		2802.7	10.4379	0.0692858
2730.94	30.2619	0.108442		2695.18	258.222	0.730949		2804.31	9.86928	0.0655113
2732.57	29.4048	0.105371		2696.81	220.5	0.624168		2805.92	10.2353	0.0679409
2734.2	26.0238	0.0932552		2698.44	194.722	0.551199		2807.53	10.1765	0.0675504
2735.82	26.0238	0.0932552		2700.08	164.111	0.464549		2809.14	10.2549	0.068071
2737.45	24.0714	0.086259		2701.71	142.167	0.402431		2810.75	10.1438	0.0673335
2739.07	21.5238	0.0771297		2703.34	128.028	0.362408		2812.36	10.3725	0.068852
2740.7	24.8333	0.0889892		2704.98	110.417	0.312556		2813.97	10.915	0.0724529
2742.32	23.2381	0.0832728		2706.61	93	0.263255		2815.57	10.5359	0.0699366
2743.95	22.7619	0.0815663		2708.24	85.0556	0.240766		2817.18	10.5948	0.0703271
2745.57	21.4524	0.0768737		2709.87	70.5556	0.199721		2818.79	9.53595	0.0632987
2747.19	20.7619	0.0743994		2711.5	69.4167	0.196497		2820.4	8.86275	0.05883
2748.82	20.5476	0.0736315		2713.14	59.6111	0.168741		2822	9.42484	0.0625611
2750.44	18.0238	0.0645876		2714.77	50.1667	0.142007		2823.61	8.76471	0.0581793
2752.06	23.381	0.0837847		2716.4	49.5556	0.140277		2825.22	9.54902	0.0633855
2753.68	18.3571	0.0657821		2718.03	44.4167	0.12573		2826.82	9.55556	0.0634288
2755.31	20.2143	0.0724371		2719.66	37.1111	0.10505		2828.43	9.18301	0.0609559
2756.93	19.9048	0.0713279		2721.28	36.5	0.10332		2830.03	9.22222	0.0612162
2758.55	18.7619	0.0672325		2722.91	34.3611	0.0972659		2831.64	9.94118	0.0659886
2760.17	17.619	0.0631371		2724.54	29.7222	0.0841346		2833.24	9.13725	0.0606522
2761.79	19.2857	0.0691096		2726.17	32.1111	0.0908968		2834.85	10.3333	0.0685917
2763.41	16.5714	0.059383		2727.8	24.6389	0.0697452		2836.45	8.92157	0.0592205
2765.03	16.619	0.0595537		2729.43	26.5	0.0750134		2838.05	8.66667	0.0575285
2766.65	14.6429	0.0524721		2731.05	25.6389	0.0725759		2839.66	10.0196	0.0665092
2768.27	16.6429	0.059639		2732.68	22.1111	0.0625898		2841.26	8.90196	0.0590903
2769.88	16.2381	0.0581885		2734.31	24.3333	0.0688803		2842.86	9.37908	0.0622575
2771.5	16.9524	0.0607482		2735.93	20.2778	0.0574002		2844.47	9.55556	0.0634288
2773.12	17.8095	0.0638197		2737.56	22.8056	0.0645556		2846.07	9.84967	0.0653812
2774.74	13.7857	0.0494005		2739.18	22.6667	0.0641624		2847.67	9.42484	0.0625611
2776.35	14.7619	0.0528987		2740.81	17.9167	0.0507166		2849.27	10.1307	0.0672467
2777.97	15.0714	0.0540078		2742.43	17.5833	0.0497731		2850.87	11.2157	0.0744486
2779.59	16.4762	0.0590417		2744.06	19.8889	0.0562994		2852.47	8.71895	0.0578756
2781.2	17.9524	0.0643316		2745.68	16.5833	0.0469424		2854.07	9.22222	0.0612162
2782.82	15.5238	0.0556289		2747.3	15.9722	0.0452125		2855.67	8.55556	0.0567909
2784.43	15	0.0537519		2748.93	16	0.0452911		2857.27	9.47059	0.0628648
2786.05	15.4524	0.055373		2750.55	15.3056	0.0433254		2858.87	7.3268	0.0486346
2787.66	18.381	0.0658674		2752.17	17.4444	0.0493799		2860.47	8.4183	0.0558799
2789.28	14.6429	0.0524721		2753.79	17	0.0481218		2862.07	8.66013	0.0574851
2790.89	17.4524	0.0625399		2755.42	16.6667	0.0471783		2863.66	9.02614	0.0599147
2792.51	16.381	0.0587005		2757.04	14	0.0396297		2865.26	9.39216	0.0623442
2794.12	13.6667	0.0489739		2758.66	13.6667	0.0386862		2866.86	8.54902	0.0567476
2795.73	15.2619	0.0546904		2760.28	12.2778	0.0347547		2868.45	8.60131	0.0570946
2797.34	15.4048	0.0552023		2761.9	14.9167	0.0422245		2870.05	9.45098	0.0627347
2798.96	16.8333	0.0603216		2763.52	14.2778	0.040416		2871.65	8.20915	0.0544915
2800.57	14.8571	0.05324		2765.14	13.8889	0.0393152		2873.24	8.79085	0.0583528
2802.18	14.9048	0.0534106		2766.76	13.3889	0.0378999		2874.84	8.13725	0.0540143
2803.79	14.9762	0.0536666		2768.38	13.9167	0.0393939		2876.43	8.88889	0.0590036
2805.4	13.0476	0.0467556		2769.99	12.8889	0.0364845		2878.03	8.86928	0.0588734
2807.01	15.6905	0.0562262		2771.61	13.5556	0.0383717		2879.62	8.84314	0.0586999
2808.62	14	0.0501684		2773.23	15.1111	0.042775		2881.22	8.05882	0.0534937
2810.23	13.619	0.0488033		2774.85	12	0.0339684		2882.81	8.14379	0.0540577
2811.84	13.1905	0.0472675		2776.46	12.1944	0.0345188		2884.4	8.62092	0.0572248
2813.45	15.3571	0.0550317		2778.08	12.1667	0.0344401		2886	9.53595	0.0632987
2815.06	15.7619	0.0564821		2779.7	10.1111	0.0286215		2887.59	8.20261	0.0544482
2816.67	15.0952	0.0540932		2781.31	11.2778	0.031924		2889.18	8.45098	0.0560968
2818.27	15.4286	0.0552876		2782.93	13.25	0.0375067		2890.77	8.81046	0.058483
2819.88	15.4048	0.0552023		2784.54	10.2222	0.028936		2892.37	8.87582	0.0589168
2821.49	16.381	0.0587005		2786.16	12.1667	0.0344401		2893.96	7.81046	0.0518451
2823.1	17.9524	0.0643316		2787.77	13.9444	0.0394725		2895.55	8.96732	0.0595242
2824.7	11.4048	0.0408685		2789.39	11.9722	0.0338897		2897.14	8.88235	0.0589602
2826.31	15.619	0.0559702		2791	13.9167	0.0393939		2898.73	9.64706	0.0640362
2827.91	11.8333	0.0424043		2792.62	10.4444	0.029565		2900.32	8.63399	0.0573116
2829.52	12.2143	0.0437694		2794.23	14.1111	0.0399443		2901.91	9.05882	0.0601316
2831.12	13.6429	0.0488886		2795.84	10.8889	0.0308231		2903.5	8.47059	0.0562269
2832.73	14.4286	0.0517042		2797.45	13.9167	0.0393939		2905.09	8.86928	0.0588734
2834.33	14.1429	0.0506803		2799.07	11.6389	0.0329462		2906.67	9.24183	0.0613464
2835.94	14.3571	0.0514482		2800.68	10.4722	0.0296437		2908.26	9.22222	0.0612162
2837.54	14.2619	0.0511069		2802.29	9.63889	0.0272848		2909.85	9.53595	0.0632987
2839.14	14.619	0.0523868		2803.9	12.6389	0.0357769		2911.44	9.03922	0.0600014
2840.75	11.6905	0.0418923		2805.51	10.9722	0.031059
2842.35	11.6667	0.041807		2807.12	12.5278	0.0354623
2843.95	16.0238	0.0574207		2808.73	10.6389	0.0301155
2845.55	15.3333	0.0549464		2810.34	12.7778	0.03617
2847.16	12.7381	0.0456464		2811.95	11.0833	0.0313735
2848.76	13.3571	0.0478648		2813.56	10.5833	0.0299582
2850.36	14.9048	0.0534106		2815.17	10.4722	0.0296437
2851.96	13.2143	0.0473528		2816.78	13.5556	0.0383717
2853.56	14.8571	0.05324		2818.38	12.1111	0.0342829
2855.16	12.6905	0.0454758		2819.99	13.0278	0.0368777
2856.76	12.2619	0.04394		2821.6	12.3611	0.0349905
2858.36	15.5	0.0555436		2823.21	9.88889	0.0279924
2859.96	10.8333	0.0388208		2824.81	10	0.028307
2861.55	13.9048	0.0498271		2826.42	11.7778	0.0333393
2863.15	14.5	0.0519602		2828.02	10.0556	0.0284642
2864.75	13.2381	0.0474382		2829.63	13.3889	0.0378999
2866.35	13.0714	0.0468409		2831.24	8.88889	0.0251617
2867.94	12.9048	0.0462437		2832.84	11.0556	0.0312949
2869.54	11.5714	0.0414657		2834.44	7.58333	0.0214661
2871.14	14.9286	0.0534959		2836.05	9.27778	0.0262626
2872.73	13.3095	0.0476941		2837.65	9.22222	0.0261053
2874.33	11.8571	0.0424896		2839.26	10.5278	0.0298009
2875.92	13.119	0.0470116		2840.86	8.30556	0.0235105
2877.52	12.8095	0.0459024		2842.46	10.6389	0.0301155
2879.11	13.5476	0.0485473		2844.06	12.6111	0.0356982
2880.71	12.4048	0.044452		2845.67	11.9444	0.0338111
2882.3	12.7381	0.0456464		2847.27	10.75	0.03043
				2848.87	9.13889	0.0258694
				2850.47	11.1389	0.0315308
				2852.07	10.5556	0.0298796
				2853.67	11.6111	0.0328675
				2855.27	12.1111	0.0342829
				2856.87	9.55556	0.0270489
				2858.47	11.1667	0.0316094
				2860.07	10.5833	0.0299582
				2861.67	9.80556	0.0277565
				2863.26	10.4444	0.029565
				2864.86	11.6667	0.0330248
				2866.46	7.61111	0.0215447
				2868.06	7.11111	0.0201294
				2869.65	8.61111	0.0243754
				2871.25	12	0.0339684
				2872.84	11.1111	0.0314522
				2874.44	8.80556	0.0249259
				2876.04	9.80556	0.0277565
				2877.63	9.75	0.0275993
				2879.23	7.63889	0.0216234
				2880.82	10.1944	0.0288574
				2882.41	9.72222	0.0275207
				2884.01	10.0833	0.0285429
				2885.6	8.80556	0.0249259
				2887.19	8	0.0226456
				2888.79	11.1667	0.0316094
				2890.38	8.63889	0.0244541
				2891.97	7.61111	0.0215447
				2893.56	9.63889	0.0272848
				2895.15	6.5	0.0183995
				2896.74	10.5556	0.0298796
				2898.33	9.25	0.0261839
				2899.92	10.25	0.0290146
				2901.51	10.5	0.0297223
				2903.1	8.83333	0.0250045
				2904.69	8.94444	0.025319
				2906.28	12.7778	0.03617
				2907.87	8.97222	0.0253976
				2909.46	10.5833	0.0299582
				2911.05	10	0.028307
				2912.63	9.61111	0.0272061

## Sheet: Figure 2
CH3 SAM				F SAM
Raman shift (cm-1)	Intensity (arb. unit)	Normalized intensity (arb. unit)		Raman shift (cm-1)	Intensity (arb. unit)	Normalized intensity (arb. unit)
1158.23	26.3393	0.097792		1068.18	53.6429	0.199149
1160.22	25.9107	0.0962008		1070.19	51.7143	0.191989
1162.2	26.625	0.0988528		1072.19	49.75	0.184697
1164.19	25.1607	0.0934162		1074.2	49.5714	0.184034
1166.17	26.0982	0.0968969		1076.21	46.75	0.17356
1168.16	24.9018	0.0924548		1078.21	43.9286	0.163085
1170.14	24.1964	0.089836		1080.22	43.8571	0.16282
1172.12	25.1518	0.093383		1082.22	44.0714	0.163615
1174.11	22.625	0.0840016		1084.23	41.6786	0.154732
1176.09	23.0446	0.0855597		1086.23	39.4286	0.146379
1178.07	24.3393	0.0903664		1088.23	35.5357	0.131926
1180.05	23.0357	0.0855265		1090.24	39.8571	0.14797
1182.03	22.9911	0.0853608		1092.24	38.6071	0.143329
1184.01	22.5446	0.0837033		1094.24	37.2857	0.138423
1185.99	22.8661	0.0848967		1096.24	40.3929	0.149959
1187.97	23.1786	0.0860569		1098.24	34.5357	0.128214
1189.95	22.3839	0.0831066		1100.24	36.8214	0.1367
1191.93	20.8482	0.0774048		1102.24	32.4286	0.120391
1193.91	20.6875	0.0768081		1104.24	37.4643	0.139086
1195.88	21.7054	0.0805872		1106.24	34.7857	0.129142
1197.86	21.5982	0.0801894		1108.24	32.2857	0.119861
1199.84	21.4732	0.0797253		1110.24	37.8571	0.140545
1201.81	20.6339	0.0766092		1112.24	36.1786	0.134313
1203.79	21.7768	0.0808524		1114.23	32.5357	0.120789
1205.77	19.1518	0.0711064		1116.23	32.8571	0.121982
1207.74	20.3393	0.0755153		1118.23	32.3571	0.120126
1209.71	19.9821	0.0741893		1120.22	32.7857	0.121717
1211.69	19.8214	0.0735926		1122.22	30	0.111375
1213.66	20.0446	0.0744213		1124.21	31.5357	0.117076
1215.63	21	0.0779684		1126.2	32.9286	0.122247
1217.61	19.1339	0.0710401		1128.2	30.0357	0.111508
1219.58	20.2857	0.0753164		1130.19	31.8214	0.118137
1221.55	18.9911	0.0705097		1132.18	29.8214	0.110712
1223.52	17.9286	0.0665648		1134.18	30.0714	0.11164
1225.49	17.5	0.0649736		1136.17	30.1786	0.112038
1227.46	18.5268	0.0687859		1138.16	29.9643	0.111243
1229.43	18.3125	0.0679903		1140.15	31.0714	0.115353
1231.4	18.4375	0.0684544		1142.14	28.1786	0.104613
1233.37	17.9464	0.0666311		1144.13	25.9643	0.0963925
1235.34	19.1161	0.0709738		1146.12	27.2857	0.101298
1237.31	16.5625	0.0614929		1148.11	28.9286	0.107397
1239.27	17.0714	0.0633824		1150.1	27.2143	0.101033
1241.24	16.3304	0.060631		1152.09	25.8571	0.0959947
1243.21	18.25	0.0677582		1154.07	21.8571	0.0811447
1245.17	16.0446	0.0595702		1156.06	25.9643	0.0963925
1247.14	17.2857	0.064178		1158.05	23.5	0.0872438
1249.1	17.8482	0.0662665		1160.03	23.9643	0.0889675
1251.07	17.2679	0.0641117		1162.02	24.3571	0.090426
1253.03	15.1696	0.0563215		1164.01	24.2857	0.0901608
1254.99	15.4554	0.0573823		1165.99	24.3571	0.090426
1256.96	16.4643	0.0611283		1167.97	23.3214	0.0865809
1258.92	15.2946	0.0567856		1169.96	20.7143	0.0769019
1260.88	16.5268	0.0613603		1171.94	22.1429	0.0822054
1262.84	15.2232	0.0565204		1173.92	23.0357	0.0855202
1264.81	16.625	0.061725		1175.91	22.2143	0.0824706
1266.77	16.4554	0.0610951		1177.89	20.1071	0.0746478
1268.73	17.0179	0.0631835		1179.87	24.4286	0.0906912
1270.69	16.8839	0.0626863		1181.85	22.3929	0.0831336
1272.65	14.6875	0.0545314		1183.83	22.1429	0.0822054
1274.6	16.1696	0.0600343		1185.81	21	0.0779626
1276.56	16.0625	0.0596365		1187.79	20.6429	0.0766367
1278.52	15.6518	0.0581116		1189.77	15.25	0.0566157
1280.48	16.0625	0.0596365		1191.75	18.5	0.0686813
1282.44	16.0714	0.0596697		1193.73	19.7857	0.0734545
1284.39	16.5625	0.0614929		1195.7	16.9643	0.06298
1286.35	15.1786	0.0563547		1197.68	18.3571	0.068151
1288.3	16.0446	0.0595702		1199.66	17.0357	0.0632452
1290.26	16.6875	0.061957		1201.63	18.7143	0.0694769
1292.21	14.8571	0.0551613		1203.61	16.1786	0.060063
1294.17	16.6161	0.0616918		1205.59	18.4643	0.0685487
1296.12	15.4643	0.0574155		1207.56	19.7143	0.0731894
1298.08	14.6339	0.0543325		1209.54	18.6071	0.0690791
1300.03	14.75	0.0547635		1211.51	15.9643	0.0592675
1301.98	16.0982	0.0597691		1213.48	17.7857	0.0660295
1303.93	15.8036	0.0586752		1215.46	14.7857	0.054892
1305.88	17.2679	0.0641117		1217.43	13.1071	0.0486603
1307.84	16.0446	0.0595702		1219.4	16.3571	0.060726
1309.79	16.8661	0.06262		1221.37	13.6429	0.0506492
1311.74	15.0893	0.0560232		1223.34	19	0.0705376
1313.69	17	0.0631172		1225.31	14.2143	0.0527706
1315.63	16.5446	0.0614266		1227.28	13.1786	0.0489255
1317.58	15.8929	0.0590067		1229.25	16.6071	0.0616541
1319.53	16.2768	0.0604321		1231.22	16.5357	0.0613889
1321.48	18.5179	0.0687527		1233.19	14.7143	0.0546268
1323.43	18.0446	0.0669958		1235.16	15.9643	0.0592675
1325.37	19.2411	0.0714379		1237.13	16.0714	0.0596652
1327.32	20.2768	0.0752832		1239.1	14.1071	0.0523728
1329.27	23.3571	0.0867199		1241.06	17.7857	0.0660295
1331.21	24.3929	0.0905653		1243.03	14.9286	0.0554224
1333.16	29.0268	0.10777		1245	15.3571	0.0570134
1335.1	34.6518	0.128654		1246.96	14.5357	0.0539639
1337.05	39.9018	0.148147		1248.93	14.0714	0.0522402
1338.99	45.5	0.168931		1250.89	14.1786	0.052638
1340.93	47.8571	0.177683		1252.85	17.2143	0.0639081
1342.88	49.9464	0.18544		1254.82	13.4286	0.0498536
1344.82	47.5625	0.176589		1256.78	15.2143	0.0564831
1346.76	41.8125	0.155241		1258.74	13.1071	0.0486603
1348.7	38.9286	0.144533		1260.71	13.8929	0.0515773
1350.64	35.0179	0.130014		1262.67	17.9286	0.0665599
1352.58	32.9286	0.122257		1264.63	12.7143	0.0472018
1354.52	28.75	0.106742		1266.59	15.25	0.0566157
1356.46	26.7679	0.0993831		1268.55	10.8571	0.0403072
1358.4	22.5268	0.083637		1270.51	14.6786	0.0544943
1360.34	23.6875	0.0879465		1272.47	12.8929	0.0478648
1362.28	21.25	0.0788966		1274.43	12.0357	0.0446826
1364.22	19.3393	0.0718025		1276.39	12.1786	0.045213
1366.15	18.0089	0.0668632		1278.35	11.0357	0.0409701
1368.09	18.0089	0.0668632		1280.3	10.3571	0.0384509
1370.03	17.2232	0.063946		1282.26	15.5	0.0575438
1371.96	16.1786	0.0600675		1284.22	9.32143	0.0346058
1373.9	17.125	0.0635813		1286.17	13.4643	0.0499862
1375.83	18.4107	0.0683549		1288.13	13.25	0.0491907
1377.77	17.7768	0.0660013		1290.09	11.6071	0.0430916
1379.7	17.6339	0.0654709		1292.04	13.7143	0.0509143
1381.64	16.7143	0.0620565		1293.99	13.3214	0.0494559
1383.57	17.4464	0.0647747		1295.95	13.3929	0.049721
1385.5	16.1786	0.0600675		1297.9	11.7857	0.0437545
1387.43	17.2946	0.0642112		1299.86	15.4643	0.0574112
1389.37	16.8304	0.0624874		1301.81	14.0714	0.0522402
1391.3	16.3393	0.0606642		1303.76	14.5714	0.0540965
1393.23	16	0.0594045		1305.71	13.2857	0.0493233
1395.16	14.7589	0.0547966		1307.66	11.4286	0.0424286
1397.09	16.2054	0.0601669		1309.61	13.6071	0.0505166
1399.02	16.1071	0.0598023		1311.56	15.9286	0.0591349
1400.95	15.25	0.0566199		1313.51	13.4643	0.0499862
1402.88	15.7054	0.0583105		1315.46	16.0357	0.0595326
1404.8	13.7857	0.0511833		1317.41	14.8214	0.0550246
1406.73	15.0536	0.0558906		1319.36	13.8571	0.0514447
1408.66	15.5714	0.0578133		1321.31	14.3571	0.0533009
1410.59	15.2232	0.0565204		1323.26	13.7857	0.0511795
1412.51	15.0714	0.0559569		1325.2	14.8214	0.0550246
1414.44	14.8839	0.0552607		1327.15	14.5714	0.0540965
1416.36	14.6518	0.0543988		1329.1	15	0.0556876
1418.29	15.6875	0.0582442		1331.04	13.8929	0.0515773
1420.21	14.2321	0.0528408		1332.99	16.4643	0.0611237
1422.14	15.5982	0.0579127		1334.93	16.2857	0.0604608
1424.06	16.0982	0.0597691		1336.88	15.2143	0.0564831
1425.99	14.3839	0.0534044		1338.82	18.2143	0.0676206
1427.91	15.5268	0.0576475		1340.76	18.1429	0.0673554
1429.83	15.5982	0.0579127		1342.71	14.6429	0.0543617
1431.75	14.1696	0.0526088		1344.65	16.3214	0.0605934
1433.67	16.6696	0.0618907		1346.59	16.9643	0.06298
1435.6	16.1161	0.0598354		1348.53	18.8929	0.0701398
1437.52	16.4732	0.0611614		1350.47	16.8571	0.0625822
1439.44	16.9464	0.0629184		1352.41	15.8571	0.0588697
1441.36	17.5089	0.0650068		1354.35	14.8214	0.0550246
1443.27	16.1607	0.0600012		1356.29	15.6786	0.0582068
1445.19	17.1161	0.0635482		1358.23	18.5714	0.0689465
1447.11	17.7589	0.065935		1360.17	14.6071	0.0542291
1449.03	16.2411	0.0602995		1362.11	16	0.0594001
1450.95	16.5625	0.0614929		1364.05	13.75	0.0510469
1452.86	17.8304	0.0662002		1365.99	11.1071	0.0412353
1454.78	16.1964	0.0601338		1367.92	11.6786	0.0433567
1460.53	18.8304	0.069913		1369.86	15	0.0556876
1462.44	15.4643	0.0574155		1371.8	13.5714	0.050384
1464.36	16.375	0.0607968		1373.73	13.8929	0.0515773
1466.27	15.9911	0.0593713		1375.67	14.5714	0.0540965
1468.18	14.5268	0.0539348		1377.6	13.75	0.0510469
1470.1	16	0.0594045		1379.54	16	0.0594001
1472.01	15.1071	0.0560895		1381.47	14.25	0.0529032
1473.92	15.4464	0.0573492		1383.4	13.8571	0.0514447
1475.83	14.1518	0.0525425		1385.34	15.4286	0.0572786
1477.74	14.1875	0.0526751		1387.27	17.3214	0.0643059
1479.65	14.4911	0.0538022		1389.2	10.8929	0.0404398
1481.56	14.1964	0.0527082		1391.13	17.2143	0.0639081
1483.47	15.0536	0.0558906		1393.06	15.5	0.0575438
1485.38	13.1696	0.048896		1394.99	14.8929	0.0552898
1487.29	14.5804	0.0541336		1396.92	12.1429	0.0450804
1489.2	13.6071	0.0505203		1398.85	14.0714	0.0522402
1491.11	12.3214	0.0457467		1400.78	12.4286	0.0461411
1493.02	14.5893	0.0541668		1402.71	12.6786	0.0470692
1494.92	13.5804	0.0504209		1404.64	10.9643	0.040705
1496.83	12.5982	0.0467744		1406.57	13.6786	0.0507817
1498.74	13.0982	0.0486308		1408.5	11.0714	0.0411027
1500.64	12.8036	0.0475368		1410.42	12.3929	0.0460085
1502.55	12.0804	0.0448517		1412.35	13.2857	0.0493233
1504.45	12.4732	0.0463103		1414.27	12.7857	0.047467
1506.36	14.4286	0.0535701		1416.2	14.2143	0.0527706
1508.26	12.7768	0.0474374		1418.13	12.0357	0.0446826
1510.17	12.8929	0.0478683		1420.05	14.2857	0.0530358
1512.07	11.9732	0.0444539		1421.97	10.3571	0.0384509
1513.97	13.6964	0.0508518		1423.9	11.9643	0.0444175
1515.87	13.0714	0.0485313		1425.82	12.2857	0.0456108
1517.77	12.125	0.0450175		1427.74	11.4643	0.0425612
1519.68	12.6339	0.046907		1429.67	13.5714	0.050384
1521.58	13.8839	0.051548		1431.59	11.75	0.0436219
1523.48	13.5179	0.0501888		1433.51	15.5	0.0575438
1525.38	12.0714	0.0448186		1435.43	11.7143	0.0434893
1527.28	11.6518	0.0432605		1437.35	13.5	0.0501188
1529.18	13.2054	0.0490286		1439.27	16.5	0.0612563
1531.07	13.3304	0.0494927		1441.19	15.3214	0.0568809
1532.97	13.3393	0.0495258		1443.11	14.3929	0.0534335
1534.87	12.8214	0.0476031		1445.03	15.3214	0.0568809
1536.77	14.2143	0.0527745		1446.95	12.6071	0.0468041
1538.67	14.6696	0.0544651		1448.87	14.8214	0.0550246
1540.56	14.8036	0.0549624		1450.79	14.2857	0.0530358
1542.46	12.6161	0.0468407		1452.7	14.1786	0.052638
1544.35	14.5893	0.0541668		1454.62	14	0.0519751
1546.25	13.7143	0.0509181		1456.54	14.5	0.0538313
1548.14	15.2321	0.0565536		1458.45	15.6071	0.0579416
1550.04	15.8929	0.0590067		1460.37	12.1429	0.0450804
1551.93	17.6071	0.0653714		1462.28	14.7857	0.054892
1553.82	19.4107	0.0720677		1464.2	14	0.0519751
1555.72	22.8839	0.084963		1466.11	13.3929	0.049721
1557.61	26.0446	0.096698		1468.02	13.2143	0.0490581
1559.5	25	0.0928195		1469.94	13.1786	0.0489255
1561.39	22.5	0.0835375		1471.85	14.4643	0.0536987
1563.28	22.3571	0.0830071		1473.76	14.5357	0.0539639
1565.18	23.8661	0.0886095		1475.67	13.1429	0.0487929
1567.07	27.5357	0.102234		1477.58	11.4643	0.0425612
1568.96	30.7054	0.114002		1479.49	11.2857	0.0418983
1570.84	38.1429	0.141616		1481.41	13.7143	0.0509143
1572.73	45.3036	0.168202		1483.32	12	0.04455
1574.62	59.6161	0.221341		1485.22	9	0.0334125
1576.51	73.0536	0.271232		1487.13	11.5714	0.042959
1578.4	91.0804	0.338161		1489.04	9.5	0.0352688
1580.29	117.455	0.436086		1490.95	12.1786	0.045213
1582.17	151.589	0.562818		1492.86	12.2143	0.0453456
1584.06	198.688	0.737683		1494.77	13.1429	0.0487929
1585.94	249.857	0.927664		1496.67	12.5	0.0464063
1587.83	273.911	1.01697		1498.58	12.1071	0.0449478
1589.71	255.455	0.948449		1500.48	11.6071	0.0430916
1591.6	191.473	0.710898		1502.39	12.1071	0.0449478
1593.48	130.536	0.48465		1504.29	11.9286	0.0442849
1595.37	86.9554	0.322846		1506.2	10.8214	0.0401746
1597.25	61.9554	0.230027		1508.1	10.3571	0.0384509
1599.13	43.6696	0.162136		1510.01	12.8571	0.0477322
1601.02	36.2946	0.134754		1511.91	12	0.04455
1602.9	30.2589	0.112345		1513.81	11.5714	0.042959
1604.78	26.8214	0.099582		1515.72	10.8571	0.0403072
1606.66	22.5893	0.083869		1517.62	9.89286	0.0367273
1608.54	22.375	0.0830734		1519.52	15	0.0556876
1610.42	20.4286	0.0758468		1521.42	11	0.0408375
1612.3	20.4464	0.0759131		1523.32	8.21429	0.0304956
1614.18	18.0536	0.0670289		1525.22	11.6429	0.0432242
1616.06	18.625	0.0691505		1527.12	10.3571	0.0384509
1617.94	17.1696	0.0637471		1529.02	14.0714	0.0522402
1619.82	18.1875	0.0675262		1530.92	10.6071	0.0393791
1621.69	16.6786	0.0619239		1532.82	13.6786	0.0507817
1623.57	16.5625	0.0614929		1534.71	13.1786	0.0489255
1625.45	17.8214	0.066167		1536.61	14.4643	0.0536987
1627.32	18.8125	0.0698467		1538.51	14.3929	0.0534335
1629.2	16.4196	0.0609625		1540.41	11.4286	0.0424286
1631.07	15.5179	0.0576144		1542.3	13.6429	0.0506492
1632.95	14.125	0.052443		1544.2	12.7857	0.047467
1634.82	14.4375	0.0536033		1546.09	10.4643	0.0388487
1636.7	12.8839	0.0478352		1547.99	12.2857	0.0456108
1638.57	13.8482	0.0514154		1549.88	12.6786	0.0470692
1640.44	12.9286	0.0480009		1551.78	18.3929	0.0682836
1642.32	12.3571	0.0458793		1553.67	17.3571	0.0644385
1644.19	13.5	0.0501225		1555.56	22.7857	0.084592
1646.06	11.4107	0.0423655		1557.46	25.75	0.095597
1647.93	12.5625	0.0466418		1559.35	23.2857	0.0864483
1649.8	11.4196	0.0423986		1561.24	18.7143	0.0694769
1651.67	10.8214	0.0401776		1563.13	18.6071	0.0690791
1653.55	10.1786	0.0377908		1565.02	18.2857	0.0678858
1655.41	9.625	0.0357355		1566.91	22.8214	0.0847246
1657.28	11.4196	0.0423986		1568.8	23.8571	0.0885697
1659.15	13.0714	0.0485313		1570.69	30.6071	0.113629
1661.02	12.6607	0.0470064		1572.58	36.4643	0.135374
1662.89	11.375	0.0422329		1574.47	48.9286	0.181648
1664.76	11.6964	0.0434263		1576.36	64.9286	0.241048
1666.62	10.1161	0.0375587		1578.25	77.8929	0.289178
1668.49	12.2768	0.045581		1580.13	108.679	0.40347
1670.36	10.125	0.0375919		1582.02	145.821	0.541363
1672.22	11.9375	0.0443213		1583.91	190.107	0.705773
1674.09	11.625	0.0431611		1585.79	238.214	0.884371
1675.95	11.5179	0.0427633		1587.68	271.607	1.00834
1677.82	11.7679	0.0436915		1589.56	254.714	0.945628
1679.68	10.9911	0.0408074		1591.45	198.964	0.738656
1681.55	10.7679	0.0399787		1593.33	131.536	0.488327
1683.41	12.2589	0.0455147		1595.22	84.5	0.313707
1685.27	11.2143	0.0416362		1597.1	57	0.211613
1687.13	10.6429	0.0395146		1598.98	40.5	0.150356
1689	12.3839	0.0459788		1600.86	31.3929	0.116546
1690.86	12.9196	0.0479678		1602.75	26	0.0965251
1692.72	11.3125	0.0420008		1604.63	25.3929	0.0942711
1694.58	11.625	0.0431611		1606.51	20.8571	0.0774322
1696.44	10.6071	0.039382		1608.39	22.5714	0.0837965
1698.3	11.5446	0.0428627		1610.27	15	0.0556876
1700.16	11.5446	0.0428627		1612.15	18.8929	0.0701398
1702.02	10.6518	0.0395477		1614.03	16.1429	0.0599304
1703.88	10.9732	0.0407411		1615.91	16.8929	0.0627148
1705.73	10.6607	0.0395809		1617.79	14.8214	0.0550246
1707.59	10.375	0.0385201		1619.67	16.2143	0.0601956
1709.45	11.2232	0.0416693		1621.54	15.2857	0.0567483
1711.31	10.5714	0.0392494		1623.42	13.1786	0.0489255
1713.16	12.5268	0.0465092		1625.3	14.0357	0.0521076
1715.02	11.1339	0.0413378		1627.17	17.25	0.0640407
1716.87	11.3482	0.0421334		1629.05	15.8929	0.0590023
1718.73	12.1696	0.0451832		1630.93	13.1786	0.0489255
1720.58	10.1429	0.0376582		1632.8	10.6786	0.0396442
1722.44	10.1786	0.0377908		1634.68	12.6786	0.0470692
1724.29	12.3482	0.0458462		1636.55	12.1429	0.0450804
1726.15	11.9286	0.0442882		1638.42	12.4643	0.0462737
1728	11.1964	0.0415699		1640.3	13.9286	0.0517099
1729.85	12.625	0.0468738		1642.17	12.1429	0.0450804
1731.7	10.1786	0.0377908		1644.04	10.2143	0.0379206
1733.55	10.0982	0.0374924		1645.91	10.25	0.0380532
1735.41	9.63393	0.0357687		1647.79	10.0714	0.0373902
1737.26	11.0446	0.0410063		1649.66	11.3214	0.0420308
1739.11	12.5268	0.0465092		1651.53	11.4286	0.0424286
1740.96	12.9643	0.0481335		1653.4	12.4643	0.0462737
1742.81	10.9732	0.0407411		1655.27	11.3929	0.042296
1744.66	9.41964	0.0349731		1657.14	10.8214	0.0401746
1746.5	11.6607	0.0432937		1659.01	11.9286	0.0442849
1748.35	10.5893	0.0393157		1660.87	10.1429	0.0376554
1750.2	11.5357	0.0428296		1662.74	10.8929	0.0404398
1752.05	12.2143	0.0453489		1664.61	11.2857	0.0418983
1753.89	10.5804	0.0392825		1666.48	9.57143	0.035534
1755.74	10.6071	0.039382		1668.34	10	0.037125
1757.59	11.6339	0.0431942		1670.21	10.8571	0.0403072
1759.43	9.875	0.0366637		1672.08	12.25	0.0454782
1761.28	11.2321	0.0417025		1673.94	12.3571	0.0458759
1763.12	10.8661	0.0403433		1675.81	9.92857	0.0368599
1764.97	11.1696	0.0414704		1677.67	9.07143	0.0336777
1766.81	10.9911	0.0408074		1679.54	10.3929	0.0385835
1768.65	11.0625	0.0410726		1681.4	9.78571	0.0363295
1770.5	11.7232	0.0435257		1683.26	10.3214	0.0383183
1772.34	11.7054	0.0434594		1685.13	11.25	0.0417657
1774.18	10.1875	0.0378239		1686.99	12.2857	0.0456108
1776.02	11.6875	0.0433931		1688.85	9.78571	0.0363295
1777.87	11.9286	0.0442882		1690.71	11.9286	0.0442849
1779.71	11.8036	0.0438241		1692.57	9.53571	0.0354014
1781.55	11.2143	0.0416362		1694.44	9.21429	0.0342081
1783.39	11.1607	0.0414373		1696.3	11.1786	0.0415005
1785.23	11.7679	0.0436915		1698.16	8.42857	0.0312911
1787.07	11.4107	0.0423655		1700.02	10.2143	0.0379206
1788.91	10.1161	0.0375587		1701.87	8.07143	0.0299652
1790.74	10.7857	0.040045		1703.73	9.53571	0.0354014
1792.58	11.4018	0.0423323		1705.59	8.71429	0.0323518
1794.42	11.2232	0.0416693		1707.45	8.42857	0.0312911
1796.26	10.8036	0.0401113		1709.31	10.1071	0.0375228
1798.09	10.9018	0.0404759		1711.16	11.5	0.0426938
1799.93	11.3304	0.0420671		1713.02	9.60714	0.0356666
1801.77	12.3393	0.045813		1714.88	9.42857	0.0350036
1803.6	11.1071	0.0412384		1716.73	11.3929	0.042296
1805.44	11.8661	0.0440561		1718.59	10.0714	0.0373902
1807.27	11.3482	0.0421334		1720.44	9.03571	0.0335451
1809.11	10.8661	0.0403433		1722.3	10.9643	0.040705
1810.94	11.0714	0.0411058		1724.15	10.6429	0.0395116
1812.77	11.8036	0.0438241		1726	7.28571	0.0270482
1814.61	11.6518	0.0432605		1727.86	11.4643	0.0425612
1816.44	11.7321	0.0435589		1729.71	8.89286	0.0330148
1818.27	11.3214	0.042034		1731.56	13.3214	0.0494559
1820.1	10.3214	0.0383212		1733.41	9.92857	0.0368599
1821.93	9.39286	0.0348736		1735.26	9.82143	0.0364621
1823.76	11.5357	0.0428296		1737.12	11.1071	0.0412353
1825.59	9.52679	0.0353709		1738.97	12.4286	0.0461411
1827.42	11.1339	0.0413378		1740.82	10.8571	0.0403072
1829.25	11.2589	0.0418019		1742.67	13.7857	0.0511795
1831.08	11.1875	0.0415367		1744.51	10.25	0.0380532
1832.91	11.4286	0.0424318		1746.36	10.8214	0.0401746
1834.74	10.5982	0.0393488		1748.21	10.9643	0.040705
1836.57	11.1607	0.0414373		1750.06	11.0714	0.0411027
1838.4	12.8571	0.0477357		1751.91	11.6071	0.0430916
1840.22	11.8393	0.0439567		1753.75	10	0.037125
1842.05	13.1161	0.0486971		1755.6	11.7857	0.0437545
1843.88	12.8036	0.0475368		1757.45	10.4286	0.0387161
1845.7	12.5536	0.0466086		1759.29	9.21429	0.0342081
1847.53	11.5625	0.042929		1761.14	12.2143	0.0453456
1849.35	12.4107	0.0460782		1762.98	9.78571	0.0363295
1851.18	11.5536	0.0428959		1764.83	13.8214	0.0513121
1853	11.625	0.0431611		1766.67	12.6071	0.0468041
1854.82	13.0536	0.048465		1768.52	11.2143	0.0416331
1856.65	13.4464	0.0499236		1770.36	9.53571	0.0354014
1858.47	13.9732	0.0518795		1772.2	9.5	0.0352688
1860.29	13.1161	0.0486971		1774.04	11	0.0408375
1862.12	13.4643	0.0499899		1775.89	11.6071	0.0430916
1863.94	14.0089	0.0520121		1777.73	10.4286	0.0387161
1865.76	13.1339	0.0487634		1779.57	10.7857	0.040042
1867.58	12.8661	0.0477689		1781.41	10.7143	0.0397768
1869.4	12.9196	0.0479678		1783.25	8.78571	0.032617
1871.22	13.1875	0.0489623		1785.09	7.67857	0.0285067
1873.04	12.5179	0.046476		1786.93	8.25	0.0306282
1874.86	13.2857	0.0493269		1788.77	8.5	0.0315563
1876.68	13.5446	0.0502883		1790.61	8.82143	0.0327496
1878.49	12.8571	0.0477357		1792.45	9.5	0.0352688
1880.31	11.6786	0.04336		1794.28	8.67857	0.0322192
1882.13	12.8482	0.0477026		1796.12	9.60714	0.0356666
1883.95	11.2054	0.041603		1797.96	7.71429	0.0286393
1885.76	12.3661	0.0459125		1799.79	9.35714	0.0347384
1887.58	12.5714	0.0466749		1801.63	9.42857	0.0350036
1889.4	13.1429	0.0487965		1803.47	7.46429	0.0277112
1891.21	12.1786	0.0452163		1805.3	9.71429	0.0360643
1893.03	13.125	0.0487302		1807.14	8.21429	0.0304956
1894.84	11.0804	0.0411389		1808.97	11.2143	0.0416331
1896.65	12.1518	0.0451169		1810.8	11.9643	0.0444175
1898.47	10.25	0.038056		1812.64	8.21429	0.0304956
1900.28	11.4554	0.0425312		1814.47	11.1786	0.0415005
1902.09	9.41964	0.0349731		1816.3	10.75	0.0399094
1903.91	12.4018	0.0460451		1818.14	8.42857	0.0312911
1905.72	12.625	0.0468738		1819.97	9.60714	0.0356666
1907.53	11.4643	0.0425644		1821.8	10.3214	0.0383183
1909.34	11.6607	0.0432937		1823.63	13	0.0482625
1911.15	10.8304	0.0402107		1825.46	8.39286	0.0311585
1912.96	12.2054	0.0453158		1827.29	10.7857	0.040042
1914.77	10.7589	0.0399455		1829.12	9.92857	0.0368599
1916.58	11.3214	0.042034		1830.95	10.0714	0.0373902
1918.39	12.9643	0.0481335		1832.78	8.78571	0.032617
1920.2	10.9375	0.0406085		1834.61	10.0357	0.0372576
1922.01	11.3125	0.0420008		1836.43	9.60714	0.0356666
1923.82	11.0714	0.0411058		1838.26	9.53571	0.0354014
1925.62	13.4911	0.0500894		1840.09	12.1071	0.0449478
1927.43	11.8036	0.0438241		1841.92	11.1071	0.0412353
1929.24	11.2321	0.0417025		1843.74	9.10714	0.0338103
1931.04	10.6429	0.0395146		1845.57	10.8571	0.0403072
1932.85	11.0536	0.0410395		1847.39	8.10714	0.0300978
1934.66	10.8571	0.0403102		1849.22	11.0714	0.0411027
1936.46	11.5982	0.0430616		1851.04	10.6786	0.0396442
1938.27	11.125	0.0413047		1852.87	8.46429	0.0314237
1940.07	11.2857	0.0419014		1854.69	12.1786	0.045213
1941.87	9.14286	0.0339454		1856.52	10.7857	0.040042
1943.68	10.5536	0.0391831		1858.34	8.89286	0.0330148
1945.48	12.5625	0.0466418		1860.16	10.5357	0.0391139
1947.28	11.2054	0.041603		1861.98	10.3214	0.0383183
1949.08	12.0625	0.0447854		1863.8	13.4286	0.0498536
1950.89	10.8839	0.0404096		1865.63	11.25	0.0417657
1952.69	10.75	0.0399124		1867.45	15.8214	0.0587371
1954.49	12.7054	0.0471722		1869.27	13.3571	0.0495884
1956.29	10.1964	0.0378571		1871.09	11.75	0.0436219
1958.09	10.2054	0.0378902		1872.91	12.1786	0.045213
1959.89	10.875	0.0403765		1874.73	11.3214	0.0420308
1961.69	11.3393	0.0421003		1876.55	11.1429	0.0413679
1963.49	9.92857	0.0368626		1878.36	10.8214	0.0401746
1965.28	11.7589	0.0436583		1880.18	9.92857	0.0368599
1967.08	12.0893	0.0448849		1882	10.75	0.0399094
1968.88	11.5625	0.042929		1883.82	8.07143	0.0299652
1970.68	10.8661	0.0403433		1885.63	10.1786	0.037788
1972.47	10.3304	0.0383543		1887.45	11.0357	0.0409701
1974.27	11.3839	0.042266		1889.27	12.9643	0.04813
1976.07	12.9464	0.0480672		1891.08	12.75	0.0473344
1977.86	11.3125	0.0420008		1892.9	10	0.037125
1979.66	12.7143	0.0472053		1894.71	11.5357	0.0428264
1981.45	12.1964	0.0452826		1896.53	9.85714	0.0365947
1983.25	12.9732	0.0481667		1898.34	9.89286	0.0367273
1985.04	10.1339	0.037625		1900.15	9.75	0.0361969
1986.83	9.70536	0.0360338		1901.97	9.21429	0.0342081
1988.63	11.9375	0.0443213		1903.78	9.42857	0.0350036
1990.42	12.0089	0.0445865		1905.59	10.1786	0.037788
1992.21	11.4911	0.0426638		1907.4	9.53571	0.0354014
1994	12.2232	0.0453821		1909.21	11.5714	0.042959
1995.8	11.1161	0.0412715		1911.02	10.6429	0.0395116
1997.59	12.1786	0.0452163		1912.83	11.5	0.0426938
1999.38	11.3125	0.0420008		1914.64	8.28571	0.0307607
2001.17	12.1518	0.0451169		1916.45	11.6786	0.0433567
2002.96	12.2411	0.0454484		1918.26	12.3214	0.0457433
2004.75	12.8661	0.0477689		1920.07	10.9643	0.040705
2006.54	11.0804	0.0411389		1921.88	11.5	0.0426938
2008.32	11.8482	0.0439898		1923.69	11.2857	0.0418983
2010.11	10.7768	0.0400118		1925.5	7.75	0.0287719
2011.9	13.0357	0.0483987		1927.3	8.85714	0.0328822
2013.69	11.1786	0.0415036		1929.11	10.1071	0.0375228
2015.47	12.7054	0.0471722		1930.92	9.89286	0.0367273
2017.26	11.5357	0.0428296		1932.72	10.2857	0.0381858
2019.05	13.5893	0.050454		1934.53	9.78571	0.0363295
2020.83	11.6071	0.0430948		1936.33	10.9643	0.040705
2022.62	11.1964	0.0415699		1938.14	7.60714	0.0282415
2024.4	12.2857	0.0456141		1939.94	8.89286	0.0330148
2026.19	12.8839	0.0478352		1941.75	9.64286	0.0357991
2027.97	10.7411	0.0398792		1943.55	9.25	0.0343407
2029.76	10.7321	0.0398461		1945.35	8.53571	0.0316889
2031.54	10.6518	0.0395477		1947.16	7.46429	0.0277112
2033.32	10.5893	0.0393157		1948.96	9.14286	0.0339429
2035.1	11.8125	0.0438572		1950.76	12.4643	0.0462737
2036.89	11.3839	0.042266		1952.56	10.5714	0.0392465
2038.67	11.4107	0.0423655		1954.36	10.25	0.0380532
2040.45	10.8839	0.0404096		1956.16	12.2857	0.0456108
2042.23	10.6518	0.0395477		1957.96	10.6429	0.0395116
2044.01	11.3571	0.0421666		1959.76	9.5	0.0352688
2045.79	10.4375	0.0387521		1961.56	14.0357	0.0521076
2047.57	11.5446	0.0428627		1963.36	9.53571	0.0354014
2049.35	10.4821	0.0389179		1965.16	11.9286	0.0442849
2051.13	11.0179	0.0409069		1966.96	10.4286	0.0387161
2052.91	9.58929	0.0356029		1968.76	7.82143	0.0290371
2054.69	10.2054	0.0378902		1970.55	9.28571	0.0344732
2056.46	10.3125	0.038288		1972.35	10.2143	0.0379206
2058.24	10.875	0.0403765		1974.15	10.6429	0.0395116
2060.02	9.89286	0.03673		1975.94	11.0714	0.0411027
2061.79	10.5714	0.0392494		1977.74	10.1071	0.0375228
2063.57	11.3929	0.0422992		1979.53	10.9286	0.0405724
2065.35	10.7232	0.0398129		1981.33	8.46429	0.0314237
2067.12	10.7857	0.040045		1983.12	9.75	0.0361969
2068.9	12.0268	0.0446528		1984.92	10.9643	0.040705
2070.67	10.1964	0.0378571		1986.71	9.10714	0.0338103
2072.44	10.2411	0.0380228		1988.5	12.2143	0.0453456
2074.22	9.64286	0.0358018		1990.3	9.28571	0.0344732
2075.99	11.0714	0.0411058		1992.09	10.1071	0.0375228
2077.76	10.5179	0.0390505		1993.88	11.0714	0.0411027
2079.54	11.0268	0.04094		1995.67	9.96429	0.0369924
2081.31	10.8125	0.0401444		1997.46	13.3214	0.0494559
2083.08	11.1696	0.0414704		1999.25	11.3929	0.042296
2084.85	10.6518	0.0395477		2001.05	14.6786	0.0544943
2086.62	10.5179	0.0390505		2002.84	9.67857	0.0359317
2088.39	9.70536	0.0360338		2004.62	10.75	0.0399094
2090.16	9.96429	0.0369952		2006.41	11.7143	0.0434893
2091.93	10.5268	0.0390836		2008.2	12.0357	0.0446826
2093.7	12.0625	0.0447854		2009.99	11.6429	0.0432242
2095.47	9.13393	0.0339123		2011.78	9.64286	0.0357991
2097.24	12.0446	0.0447191		2013.57	11.1429	0.0413679
2099.01	11.2411	0.0417356		2015.35	9.5	0.0352688
2100.77	11.6607	0.0432937		2017.14	12.5357	0.0465389
2102.54	11.1875	0.0415367		2018.93	9.67857	0.0359317
2104.31	11.8304	0.0439235		2020.71	13.5	0.0501188
2106.07	9.51786	0.0353377		2022.5	11.4643	0.0425612
2107.84	11.8661	0.0440561		2024.28	10.6071	0.0393791
2109.61	11.1071	0.0412384		2026.07	8.64286	0.0320866
2111.37	10.7679	0.0399787		2027.85	10.3214	0.0383183
2113.14	9.58929	0.0356029		2029.64	9.17857	0.0340755
2114.9	10.7143	0.0397798		2031.42	8.78571	0.032617
2116.66	10.9196	0.0405422		2033.2	11.25	0.0417657
2118.43	11.9911	0.0445202		2034.98	11.1071	0.0412353
2120.19	9.40179	0.0349068		2036.77	8.57143	0.0318215
2121.95	9.00893	0.0334482		2038.55	10.3929	0.0385835
2123.72	9.83929	0.0365311		2040.33	8.92857	0.0331474
2125.48	11.5893	0.0430285		2042.11	9.82143	0.0364621
2127.24	9.54464	0.0354372		2043.89	10.7857	0.040042
2129	9.84821	0.0365642		2045.67	10.3571	0.0384509
2130.76	9.39286	0.0348736		2047.45	8.75	0.0324844
2132.52	10.8929	0.0404428		2049.23	8.10714	0.0300978
2134.28	9.41964	0.0349731		2051.01	11.7143	0.0434893
2136.04	11	0.0408406		2052.79	6.78571	0.025192
2137.8	10.5714	0.0392494		2054.57	10	0.037125
2139.56	10.2589	0.0380891		2056.35	10.25	0.0380532
2141.32	8.91964	0.0331167		2058.12	11	0.0408375
2143.08	9.58929	0.0356029		2059.9	9.32143	0.0346058
2144.83	9.36607	0.0347742		2061.68	9.17857	0.0340755
2146.59	9.08036	0.0337134		2063.45	9.07143	0.0336777
2148.35	9.15179	0.0339786		2065.23	10.1071	0.0375228
2150.1	10.3393	0.0383875		2067	9.07143	0.0336777
2151.86	10.5982	0.0393488		2068.78	7.57143	0.028109
2153.62	11.2411	0.0417356		2070.55	6.14286	0.0228054
2155.37	10.2321	0.0379897		2072.33	10.1071	0.0375228
2157.13	11.0446	0.0410063		2074.1	10	0.037125
2158.88	9.99107	0.0370946		2075.87	7.14286	0.0265179
2160.63	10.1786	0.0377908		2077.65	8.71429	0.0323518
2162.39	11.0536	0.0410395		2079.42	8.17857	0.030363
2164.14	10.125	0.0375919		2081.19	11.4643	0.0425612
2165.89	9.625	0.0357355		2082.96	9.10714	0.0338103
2167.65	9.22321	0.0342438		2084.73	10	0.037125
2169.4	10.9286	0.0405754		2086.51	10.3214	0.0383183
2171.15	9.80357	0.0363985		2088.28	9.10714	0.0338103
2172.9	10.0625	0.0373598		2090.05	11.1429	0.0413679
2174.65	11.2321	0.0417025		2091.82	8	0.0297
2176.4	11.6161	0.0431279		2093.59	9.96429	0.0369924
2178.15	9.11607	0.033846		2095.35	10.8214	0.0401746
2179.9	7.75893	0.0288072		2097.12	7.85714	0.0291697
2181.65	10.9286	0.0405754		2098.89	8.42857	0.0312911
2183.4	8.25	0.0306304		2100.66	10.3214	0.0383183
2185.15	9.44643	0.0350725		2102.43	9.71429	0.0360643
2186.9	9.13393	0.0339123		2104.19	10.9643	0.040705
2188.64	10.0179	0.0371941		2105.96	7.39286	0.027446
2190.39	9.67857	0.0359344		2107.73	7.25	0.0269157
2192.14	10.3036	0.0382549		2109.49	8.82143	0.0327496
2193.89	9.92857	0.0368626		2111.26	8.78571	0.032617
2195.63	10.9554	0.0406748		2113.02	6.57143	0.0243965
2197.38	10.5089	0.0390173		2114.79	9.96429	0.0369924
2199.12	9.39286	0.0348736		2116.55	11.9286	0.0442849
2200.87	8.33036	0.0309288		2118.31	6.42857	0.0238661
2202.61	11.0536	0.0410395		2120.08	9.07143	0.0336777
2204.36	9.9375	0.0368957		2121.84	8.17857	0.030363
2206.1	11.1964	0.0415699		2123.6	10.2857	0.0381858
2207.84	8.54464	0.0317244		2125.36	9.78571	0.0363295
2209.59	9.66071	0.0358681		2127.13	7.03571	0.0261201
2211.33	10.3304	0.0383543		2128.89	10.2143	0.0379206
2213.07	9.19643	0.0341443		2130.65	8.78571	0.032617
2214.81	8.86607	0.0329178		2132.41	7.89286	0.0293023
2216.55	10.4643	0.0388516		2134.17	8.5	0.0315563
2218.3	10.0179	0.0371941		2135.93	7.17857	0.0266505
2220.04	10.7321	0.0398461		2137.69	8.78571	0.032617
2221.78	9.90179	0.0367631		2139.45	10.8571	0.0403072
2223.52	11.0625	0.0410726		2141.21	9.96429	0.0369924
2225.26	9.21429	0.0342106		2142.96	10.6786	0.0396442
2226.99	10.1161	0.0375587		2144.72	8.82143	0.0327496
2228.73	10.3571	0.0384538		2146.48	9.75	0.0361969
2230.47	11.7411	0.043592		2148.24	6.71429	0.0249268
2232.21	10.7946	0.0400781		2149.99	9.35714	0.0347384
2233.95	10.8036	0.0401113		2151.75	11.4286	0.0424286
2235.68	10.4286	0.038719		2153.5	8.60714	0.031954
2237.42	10.5268	0.0390836		2155.26	8.60714	0.031954
2239.16	9.91964	0.0368294		2157.01	7.67857	0.0285067
2240.89	10.7321	0.0398461		2158.77	9.57143	0.035534
2242.63	9.03571	0.0335476		2160.52	9.14286	0.0339429
2244.36	10.8125	0.0401444		2162.28	10.2143	0.0379206
2246.1	9.08929	0.0337465		2164.03	10.9286	0.0405724
2247.83	9.83929	0.0365311		2165.78	11.8929	0.0441523
2249.57	8.99107	0.0333819		2167.54	9.96429	0.0369924
2251.3	8.74107	0.0324537		2169.29	7.89286	0.0293023
2253.03	9.91071	0.0367963		2171.04	6.96429	0.0258549
2254.77	9.98214	0.0370615		2172.79	10.7857	0.040042
2256.5	9.61607	0.0357024		2174.54	9.53571	0.0354014
2258.23	10.25	0.038056		2176.29	8.25	0.0306282
2259.96	11.0536	0.0410395		2178.04	9.25	0.0343407
2261.69	10.6339	0.0394814		2179.79	9.78571	0.0363295
2263.42	9.11607	0.033846		2181.54	11.0357	0.0409701
2265.15	11.1696	0.0414704		2183.29	4.85714	0.0180322
2266.89	8.53571	0.0316912		2185.04	9	0.0334125
2268.61	10.125	0.0375919		2186.79	11.75	0.0436219
2270.34	10.4643	0.0388516		2188.54	9.21429	0.0342081
2272.07	9.33036	0.0346416		2190.28	8.03571	0.0298326
2273.8	8.55357	0.0317575		2192.03	8.64286	0.0320866
2275.53	10.2321	0.0379897		2193.78	7.60714	0.0282415
2277.26	9.71429	0.036067		2195.52	7.64286	0.0283741
2278.98	11.2768	0.0418682		2197.27	8.28571	0.0307607
2280.71	8.4375	0.0313266		2199.02	7.03571	0.0261201
2282.44	10.5625	0.0392162		2200.76	9.46429	0.0351362
2284.16	10.0804	0.0374261		2202.5	8.42857	0.0312911
2285.89	10.2411	0.0380228		2204.25	7.42857	0.0275786
2287.62	9.875	0.0366637		2205.99	6.28571	0.0233357
2289.34	10.0446	0.0372935		2207.74	10.0714	0.0373902
2291.07	9.75	0.0361996		2209.48	8.53571	0.0316889
2292.79	10.4911	0.038951		2211.22	10.6786	0.0396442
2294.51	10.1607	0.0377245		2212.96	9.35714	0.0347384
2296.24	10.7054	0.0397466		2214.71	9.39286	0.034871
2297.96	10.5179	0.0390505		2216.45	8.32143	0.0308933
2299.68	9.24107	0.0343101		2218.19	9.53571	0.0354014
2301.41	8.79464	0.0326526		2219.93	7.32143	0.0271808
2303.13	10.1161	0.0375587		2221.67	7.78571	0.0289045
2304.85	9.26786	0.0344095		2223.41	9.07143	0.0336777
2306.57	10.0982	0.0374924		2225.15	10.2143	0.0379206
2308.29	9.86607	0.0366305		2226.89	9.82143	0.0364621
2310.01	10.6875	0.0396803		2228.63	7.5	0.0278438
2311.73	9.44643	0.0350725		2230.37	9.10714	0.0338103
2313.45	10.6339	0.0394814		2232.1	9.46429	0.0351362
2315.17	10.0714	0.037393		2233.84	12.3571	0.0458759
2316.89	11.6071	0.0430948		2235.58	8.03571	0.0298326
2318.61	9.83929	0.0365311		2237.32	10.5357	0.0391139
2320.33	10.4375	0.0387521		2239.05	6.78571	0.025192
2322.04	9.375	0.0348073		2240.79	10	0.037125
2323.76	11.1875	0.0415367		2242.52	8.42857	0.0312911
2325.48	11.5536	0.0428959		2244.26	8.17857	0.030363
2327.19	12.7411	0.0473048		2245.99	8	0.0297
2328.91	15.9643	0.0592719		2247.73	8.89286	0.0330148
2330.63	23.7589	0.0882117		2249.46	8.10714	0.0300978
2332.34	36.4018	0.135152		2251.2	8.82143	0.0327496
2334.06	39.1607	0.145395		2252.93	7.14286	0.0265179
2335.77	26.6696	0.0990185		2254.66	11.1071	0.0412353
2337.48	12.8482	0.0477026		2256.4	8.64286	0.0320866
2339.2	9.83929	0.0365311		2258.13	8.67857	0.0322192
2340.91	10.4911	0.038951		2259.86	10.2143	0.0379206
2342.63	11.2946	0.0419345		2261.59	10.25	0.0380532
2344.34	11.5357	0.0428296		2263.32	6.28571	0.0233357
2346.05	11.4554	0.0425312		2265.05	8.89286	0.0330148
2347.76	10.7946	0.0400781		2266.78	9.96429	0.0369924
2349.47	9.46429	0.0351388		2268.51	9.89286	0.0367273
2351.18	10.7143	0.0397798		2270.24	7.25	0.0269157
2352.9	11.3839	0.042266		2271.97	10.6429	0.0395116
2354.61	10.9375	0.0406085		2273.7	7.60714	0.0282415
2356.32	9.3125	0.0345753		2275.43	9.96429	0.0369924
2358.03	10.1607	0.0377245		2277.16	8.57143	0.0318215
2359.73	9.44643	0.0350725		2278.88	11.2143	0.0416331
2361.44	10	0.0371278		2280.61	10.0714	0.0373902
2363.15	9.66964	0.0359013		2282.34	5.89286	0.0218773
2364.86	11	0.0408406		2284.06	7.92857	0.0294349
2366.57	10.4196	0.0386858		2285.79	12.3214	0.0457433
2368.28	11.1964	0.0415699		2287.51	9.39286	0.034871
2369.98	12.2143	0.0453489		2289.24	8.78571	0.032617
2371.69	11.5268	0.0427964		2290.96	8.03571	0.0298326
2373.4	10.4732	0.0388847		2292.69	11.6071	0.0430916
2375.1	11.8482	0.0439898		2294.41	10.3571	0.0384509
2376.81	11.4018	0.0423323		2296.14	10.7857	0.040042
2378.51	11.3393	0.0421003		2297.86	7.96429	0.0295674
2380.22	10.1875	0.0378239		2299.58	7.92857	0.0294349
2381.92	12.4107	0.0460782		2301.31	7.85714	0.0291697
2383.62	12.1429	0.0450837		2303.03	8.07143	0.0299652
2385.33	12.0982	0.044918		2304.75	8.67857	0.0322192
2387.03	11.4196	0.0423986		2306.47	9.89286	0.0367273
2388.73	11.0089	0.0408737		2308.19	7	0.0259875
2390.44	9.60714	0.0356692		2309.91	8.89286	0.0330148
2392.14	12.125	0.0450175		2311.63	7.71429	0.0286393
2393.84	12.2232	0.0453821		2313.35	7.07143	0.0262527
2395.54	10.7232	0.0398129		2315.07	6.60714	0.024529
2397.24	11.9732	0.0444539		2316.79	8.46429	0.0314237
2398.94	11.8036	0.0438241		2318.51	6.42857	0.0238661
2400.64	11.7232	0.0435257		2320.23	9.71429	0.0360643
2402.34	11.3929	0.0422992		2321.94	8.17857	0.030363
2404.04	12.0089	0.0445865		2323.66	10.5714	0.0392465
2405.74	13.0179	0.0483324		2325.38	7.64286	0.0283741
2407.44	11.125	0.0413047		2327.1	9.96429	0.0369924
2409.14	12.8125	0.04757		2328.81	12.7143	0.0472018
2410.84	12.5357	0.0465423		2330.53	20.4643	0.0759737
2412.53	12.9464	0.0480672		2332.24	28.5714	0.106072
2414.23	12.125	0.0450175		2333.96	37.7857	0.14028
2415.93	12.6964	0.047139		2335.67	28.1429	0.10448
2417.62	13.0179	0.0483324		2337.39	16.8929	0.0627148
2419.32	12.0089	0.0445865		2339.1	10.1429	0.0376554
2421.01	11.1429	0.041371		2340.82	9.03571	0.0335451
2422.71	12.1339	0.0450506		2342.53	10.6786	0.0396442
2424.4	12.8393	0.0476694		2344.24	10.5714	0.0392465
2426.1	13.1339	0.0487634		2345.95	5.89286	0.0218773
2427.79	12.4554	0.046244		2347.67	10.3214	0.0383183
2429.49	11.3482	0.0421334		2349.38	11.5	0.0426938
2431.18	12.2143	0.0453489		2351.09	8.28571	0.0307607
2432.87	13.3214	0.0494595		2352.8	8.53571	0.0316889
2434.56	13.6071	0.0505203		2354.51	12.7143	0.0472018
2436.26	15.7589	0.0585094		2356.22	9.89286	0.0367273
2437.95	15.8214	0.0587415		2357.93	8.57143	0.0318215
2439.64	17.3571	0.0644432		2359.64	11.2857	0.0418983
2441.33	16.7054	0.0620233		2361.35	10.5357	0.0391139
2443.02	17.4286	0.0647084		2363.06	10	0.037125
2444.71	18.7679	0.0696809		2364.77	9.60714	0.0356666
2446.4	21.0357	0.078101		2366.47	8.53571	0.0316889
2448.09	21.1607	0.0785651		2368.18	11.5357	0.0428264
2449.78	23.3214	0.0865873		2369.89	10.3571	0.0384509
2451.47	27.8839	0.103527		2371.59	9.96429	0.0369924
2453.16	29.0625	0.107903		2373.3	8.64286	0.0320866
2454.85	30.0714	0.111649		2375.01	9.28571	0.0344732
2456.53	31.6071	0.11735		2376.71	9.39286	0.034871
2458.22	30.9375	0.114864		2378.42	7.78571	0.0289045
2459.91	31.3036	0.116223		2380.12	9.78571	0.0363295
2461.59	30.5625	0.113472		2381.83	9.17857	0.0340755
2463.28	30.2768	0.112411		2383.53	9.92857	0.0368599
2464.97	29.6161	0.109958		2385.23	10.1786	0.037788
2466.65	27.5804	0.1024		2386.94	9.46429	0.0351362
2468.34	26.2589	0.0974936		2388.64	8.10714	0.0300978
2470.02	25.0893	0.093151		2390.34	10.8929	0.0404398
2471.71	23.6429	0.0877807		2392.05	12.3929	0.0460085
2473.39	25.5536	0.0948748		2393.75	12.7857	0.047467
2475.07	23.1339	0.0858912		2395.45	11.8929	0.0441523
2476.76	22.6786	0.0842005		2397.15	9.5	0.0352688
2478.44	21.9732	0.0815817		2398.85	11.8929	0.0441523
2480.12	21.9107	0.0813496		2400.55	10.1071	0.0375228
2481.8	20.3839	0.075681		2402.25	9.07143	0.0336777
2483.48	20.5357	0.0762446		2403.95	12.4286	0.0461411
2485.17	19.7768	0.0734268		2405.65	12.1071	0.0449478
2486.85	18.75	0.0696146		2407.35	11.5357	0.0428264
2488.53	18.1875	0.0675262		2409.05	10.5357	0.0391139
2490.21	19.0268	0.0706423		2410.74	9.71429	0.0360643
2491.89	18.4643	0.0685538		2412.44	9.35714	0.0347384
2493.57	16.7768	0.0622885		2414.14	10.6429	0.0395116
2495.25	16.9911	0.0630841		2415.84	13.4286	0.0498536
2496.92	16.6429	0.0617913		2417.53	11.6071	0.0430916
2498.6	16.1071	0.0598023		2419.23	11.5	0.0426938
2500.28	15.4375	0.057316		2420.92	9.78571	0.0363295
2501.96	14.2143	0.0527745		2422.62	9.89286	0.0367273
2503.64	14.7589	0.0547966		2424.31	9.92857	0.0368599
2505.31	15.1339	0.0561889		2426.01	12.5	0.0464063
2506.99	15.6161	0.057979		2427.7	9.46429	0.0351362
2508.66	13.7143	0.0509181		2429.4	9.21429	0.0342081
2510.34	15.9375	0.0591724		2431.09	12.3571	0.0458759
2512.02	14.7232	0.054664		2432.78	12.0714	0.0448152
2513.69	16.0268	0.0595039		2434.48	11.75	0.0436219
2515.37	14.1875	0.0526751		2436.17	14.3929	0.0534335
2517.04	14.7857	0.0548961		2437.86	13.6071	0.0505166
2518.71	13.4911	0.0500894		2439.55	17.2857	0.0641733
2520.39	14.3571	0.0533049		2441.24	14.8929	0.0552898
2522.06	13.4554	0.0499568		2442.93	14.5714	0.0540965
2523.73	14.8036	0.0549624		2444.62	15.4286	0.0572786
2525.4	13.5268	0.050222		2446.31	16.8929	0.0627148
2527.08	13.625	0.0505866		2448	12.8214	0.0475996
2528.75	13.5446	0.0502883		2449.69	19.3214	0.0717309
2530.42	14.9018	0.055327		2451.38	23.1786	0.0860505
2532.09	14.2768	0.0530066		2453.07	24.1429	0.0896304
2533.76	13.5446	0.0502883		2454.76	22.5	0.0835313
2535.43	12.8036	0.0475368		2456.45	24.9643	0.09268
2537.1	13.9196	0.0516806		2458.13	28.7143	0.106602
2538.77	14.625	0.0542994		2459.82	25.2143	0.0936081
2540.44	12.875	0.047802		2461.51	24.6786	0.0916193
2542.11	11.75	0.0436252		2463.19	23.5	0.0872438
2543.78	12.9554	0.0481004		2464.88	20.5714	0.0763715
2545.44	12.9821	0.0481998		2466.56	22.9286	0.0851224
2547.11	14.2143	0.0527745		2468.25	20.6429	0.0766367
2548.78	14.0089	0.0520121		2469.93	18.8214	0.0698746
2550.45	14.2054	0.0527414		2471.62	17.9643	0.0666925
2552.11	11.9375	0.0443213		2473.3	23	0.0853876
2553.78	13.4643	0.0499899		2474.99	18.8571	0.0700072
2555.44	12.625	0.0468738		2476.67	15.9643	0.0592675
2557.11	14.9018	0.055327		2478.35	17.1786	0.0637755
2558.77	13.3571	0.0495921		2480.03	19.2857	0.0715983
2560.44	15.375	0.057084		2481.72	21.1071	0.0783603
2562.1	12.4196	0.0461114		2483.4	15.3929	0.057146
2563.77	14.4018	0.0534707		2485.08	16.6071	0.0616541
2565.43	12.6071	0.0468075		2486.76	17.4643	0.0648362
2567.09	14.3482	0.0532718		2488.44	14.5357	0.0539639
2568.76	12.4554	0.046244		2490.12	16.25	0.0603282
2570.42	13.6161	0.0505535		2491.8	13.7143	0.0509143
2572.08	13.875	0.0515148		2493.48	16.3571	0.060726
2573.74	13.9464	0.05178		2495.16	13.3929	0.049721
2575.4	13.2321	0.049128		2496.84	16.4286	0.0609911
2577.06	14.7768	0.0548629		2498.52	15	0.0556876
2578.72	13.5893	0.050454		2500.2	14.2143	0.0527706
2580.38	14.3661	0.0533381		2501.87	12.2143	0.0453456
2582.04	13.375	0.0496584		2503.55	10.3214	0.0383183
2583.7	15.2768	0.0567193		2505.23	13.5714	0.050384
2585.36	14.2411	0.052874		2506.9	12.1429	0.0450804
2587.02	15.3393	0.0569514		2508.58	13.3929	0.049721
2588.68	13.0982	0.0486308		2510.26	14.25	0.0529032
2590.34	15.2054	0.0564541		2511.93	14.8214	0.0550246
2592	15.2143	0.0564873		2513.61	13.2857	0.0493233
2593.65	14.9911	0.0556585		2515.28	11.9286	0.0442849
2595.31	14.4821	0.053769		2516.96	12.75	0.0473344
2596.97	14.9107	0.0553602		2518.63	10.8929	0.0404398
2598.62	15.875	0.0589404		2520.3	12.4643	0.0462737
2600.28	14.7232	0.054664		2521.98	11.9286	0.0442849
2601.93	16.4018	0.0608962		2523.65	10.6071	0.0393791
2603.59	14.5625	0.0540673		2525.32	10.2857	0.0381858
2605.24	16.125	0.0598686		2526.99	14.8571	0.0551572
2606.9	17.5625	0.0652057		2528.67	10.1071	0.0375228
2608.55	15.9821	0.0593382		2530.34	12.75	0.0473344
2610.2	16.6339	0.0617581		2532.01	11.7857	0.0437545
2611.86	18.4732	0.068587		2533.68	10.3929	0.0385835
2613.51	20.1339	0.0747528		2535.35	11.1786	0.0415005
2615.16	18.7321	0.0695483		2537.02	10.5357	0.0391139
2616.82	20.2321	0.0751175		2538.69	12.7857	0.047467
2618.47	18.7589	0.0696478		2540.36	10.7143	0.0397768
2620.12	21.7232	0.0806535		2542.03	11.1429	0.0413679
2621.77	20.3393	0.0755153		2543.69	13.2857	0.0493233
2623.42	22.9018	0.0850293		2545.36	12.0714	0.0448152
2625.07	23.2232	0.0862227		2547.03	11.6786	0.0433567
2626.72	24.8393	0.0922228		2548.7	10.2857	0.0381858
2628.37	26.6696	0.0990185		2550.36	10.5	0.0389813
2630.02	28.1518	0.104521		2552.03	10.8929	0.0404398
2631.67	28.7857	0.106875		2553.7	10.7857	0.040042
2633.32	31.5268	0.117052		2555.36	12.7143	0.0472018
2634.96	33.4821	0.124312		2557.03	10.6429	0.0395116
2636.61	35.5625	0.132036		2558.69	11.8571	0.0440197
2638.26	37.4464	0.13903		2560.36	13.1429	0.0487929
2639.91	41.6786	0.154743		2562.02	9.89286	0.0367273
2641.55	43.75	0.162434		2563.69	10.75	0.0399094
2643.2	50.4643	0.187363		2565.35	9.10714	0.0338103
2644.85	56.4196	0.209474		2567.01	9.89286	0.0367273
2646.49	60.5714	0.224888		2568.68	10.3214	0.0383183
2648.14	67.2589	0.249718		2570.34	13.75	0.0510469
2649.78	77.4554	0.287575		2572	11.9643	0.0444175
2651.43	85.9464	0.3191		2573.66	12.3214	0.0457433
2653.07	95.0357	0.352847		2575.32	8.17857	0.030363
2654.71	110.83	0.411489		2576.98	10.8929	0.0404398
2656.36	125.268	0.465092		2578.65	10.7143	0.0397768
2658	142.83	0.530298		2580.31	13.3214	0.0494559
2659.64	165.161	0.613205		2581.97	9.60714	0.0356666
2661.28	188.768	0.700853		2583.63	14.4286	0.0535661
2662.93	216.071	0.802226		2585.28	12.7857	0.047467
2664.57	243.848	0.905355		2586.94	13.6071	0.0505166
2666.21	281.929	1.04674		2588.6	12.3214	0.0457433
2667.85	319.598	1.1866		2590.26	13.8571	0.0514447
2669.49	354.616	1.31661		2591.92	12.75	0.0473344
2671.13	394.821	1.46588		2593.57	13.0714	0.0485277
2672.77	435.188	1.61576		2595.23	12.5	0.0464063
2674.41	463.482	1.72081		2596.89	12.7143	0.0472018
2676.05	493.893	1.83372		2598.54	13.2143	0.0490581
2677.69	508.277	1.88712		2600.2	17.0357	0.0632452
2679.33	522.17	1.9387		2601.86	13.7857	0.0511795
2680.96	515.098	1.91245		2603.51	13.6786	0.0507817
2682.6	503.866	1.87074		2605.17	13.7143	0.0509143
2684.24	477.241	1.77189		2606.82	14.2857	0.0530358
2685.88	455.348	1.69061		2608.47	14.5357	0.0539639
2687.51	415.027	1.5409		2610.13	13.2857	0.0493233
2689.15	382.464	1.42001		2611.78	13.3571	0.0495884
2690.78	342.866	1.27299		2613.43	13.75	0.0510469
2692.42	305.946	1.13591		2615.09	16.1071	0.0597978
2694.05	271.152	1.00673		2616.74	18.9286	0.0702724
2695.69	241.473	0.896537		2618.39	16.1786	0.060063
2697.32	209.348	0.777264		2620.04	17.8214	0.0661621
2698.96	183.821	0.682488		2621.69	20.2143	0.0750456
2700.59	160.875	0.597293		2623.34	22.3929	0.0831336
2702.22	140.554	0.521844		2624.99	18.2143	0.0676206
2703.86	121.679	0.451766		2626.64	18.8214	0.0698746
2705.49	109.83	0.407776		2628.29	23.4286	0.0869787
2707.12	97.2321	0.361001		2629.94	20.8929	0.0775648
2708.75	88.0625	0.326957		2631.59	20.3214	0.0754434
2710.39	77.7857	0.288801		2633.24	29.5357	0.109651
2712.02	71.7232	0.266292		2634.89	26.6429	0.0989117
2713.65	65.9018	0.244679		2636.54	29.1786	0.108326
2715.28	59.8929	0.222369		2638.18	29.5714	0.109784
2716.91	53.5625	0.198866		2639.83	35.6786	0.132457
2718.54	51.7411	0.192103		2641.48	36.3214	0.134843
2720.17	48.5446	0.180236		2643.13	40.6071	0.150754
2721.8	45.3661	0.168434		2644.77	42.7857	0.158842
2723.42	43.4286	0.161241		2646.42	47.3929	0.175946
2725.05	40.8661	0.151727		2648.06	49.0357	0.182045
2726.68	36.1518	0.134224		2649.71	55.7857	0.207105
2728.31	35.4732	0.131704		2651.35	63.8929	0.237202
2729.94	32.5714	0.120931		2653	70.5357	0.261864
2731.56	31.5357	0.117085		2654.64	80.5	0.298857
2733.19	29.4821	0.109461		2656.28	92.4643	0.343274
2734.81	30.4286	0.112975		2657.93	100.714	0.373902
2736.44	27.7411	0.102996		2659.57	115.321	0.428131
2738.07	26.5804	0.098687		2661.21	131.893	0.489653
2739.69	23.7768	0.088278		2662.85	147.107	0.546136
2741.32	24.1786	0.0897697		2664.5	169.179	0.628076
2742.94	22.1429	0.0822115		2666.14	187.786	0.697155
2744.56	21.3304	0.0791949		2667.78	213.429	0.792354
2746.19	19.6161	0.0728301		2669.42	250.821	0.931175
2747.81	21.2679	0.0789629		2671.06	273.643	1.0159
2749.43	19.9107	0.0739241		2672.7	304.107	1.129
2751.06	19.3661	0.071902		2674.34	332.571	1.23467
2752.68	18.0179	0.0668963		2675.98	347	1.28824
2754.3	17.5893	0.0653051		2677.62	368.964	1.36978
2755.92	16.8125	0.0624211		2679.25	372.893	1.38437
2757.54	16.9196	0.0628189		2680.89	375.5	1.39405
2759.16	17.0357	0.0632498		2682.53	370.464	1.37535
2760.78	15.75	0.0584763		2684.17	348.071	1.29222
2762.4	17.0536	0.0633161		2685.8	327.25	1.21492
2764.02	17.0804	0.0634156		2687.44	303.036	1.12502
2765.64	15.9821	0.0593382		2689.08	274.964	1.02081
2767.26	15	0.0556917		2690.71	253.714	0.941915
2768.88	14.4821	0.053769		2692.35	222.179	0.824839
2770.5	14.3036	0.053106		2693.98	198.071	0.735341
2772.12	14.3393	0.0532386		2695.62	179.107	0.664936
2773.74	14.1339	0.0524762		2697.25	160.143	0.594531
2775.35	13.5357	0.0502551		2698.89	139.821	0.519088
2776.97	14.2143	0.0527745		2700.52	135.357	0.502514
2778.59	13.4196	0.0498242		2702.15	122.643	0.455312
2780.2	14.7589	0.0547966		2703.79	110.107	0.408773
2781.82	13.9196	0.0516806		2705.42	103.679	0.384907
2783.43	13.5982	0.0504872		2707.05	92.9643	0.34513
2785.05	13.4018	0.0497579		2708.68	87.2857	0.324049
2786.66	14	0.0519789		2710.32	81.5357	0.302702
2788.28	13.4464	0.0499236		2711.95	80.6786	0.299519
2789.89	13.5804	0.0504209		2713.58	72.2857	0.268361
2791.51	13.2768	0.0492938		2715.21	67.6071	0.250992
2793.12	12.9107	0.0479346		2716.84	61.7143	0.229115
2794.73	12.5536	0.0466086		2718.47	57.5357	0.213602
2796.34	13.3571	0.0495921		2720.1	56.1786	0.208563
2797.96	12.3482	0.0458462		2721.73	55.7857	0.207105
2799.57	13.2321	0.049128		2723.36	50.4286	0.187216
2801.18	12.6875	0.0471059		2724.98	50.4286	0.187216
2802.79	14.0089	0.0520121		2726.61	45.9643	0.170643
2804.4	13.2321	0.049128		2728.24	41.0714	0.152478
2806.01	12.1339	0.0450506		2729.87	39.8214	0.147837
2807.62	12.8125	0.04757		2731.49	33.1429	0.123043
2809.23	13.0446	0.0484319		2733.12	36.3214	0.134843
2810.84	12.2679	0.0455478		2734.75	29.7143	0.110314
2812.45	12.125	0.0450175		2736.37	33.6786	0.125032
2814.06	12.4732	0.0463103		2738	29.9286	0.11111
2815.67	12.2768	0.045581		2739.62	26.0357	0.0966577
2817.28	11.9375	0.0443213		2741.25	28	0.10395
2818.88	13.375	0.0496584		2742.87	24.25	0.0900282
2820.49	12.2946	0.0456473		2744.5	23.7143	0.0880394
2822.1	13.1607	0.0488628		2746.12	22.7857	0.084592
2823.71	12.8839	0.0478352		2747.74	23.9643	0.0889675
2825.31	13.2411	0.0491612		2749.37	16.6786	0.0619193
2826.92	10.6339	0.0394814		2750.99	18.2857	0.0678858
2828.52	10.9464	0.0406417		2752.61	17.8571	0.0662947
2830.13	13.3929	0.0497247		2754.23	18.0714	0.0670902
2831.73	11.125	0.0413047		2755.86	12.8571	0.0477322
2833.34	10.8661	0.0403433		2757.48	16.8214	0.0624496
2834.94	13.75	0.0510507		2759.1	13.75	0.0510469
2836.55	10.3571	0.0384538		2760.72	13.8214	0.0513121
2838.15	12.4107	0.0460782		2762.34	13.0714	0.0485277
2839.75	11.25	0.0417688		2763.96	12.9286	0.0479974
2841.36	12.2321	0.0454152		2765.58	11.4643	0.0425612
2842.96	11.2054	0.041603		2767.2	13.3571	0.0495884
2844.56	12.4821	0.0463434		2768.82	15.3214	0.0568809
2846.16	11.5714	0.0429622		2770.44	12.8571	0.0477322
2847.76	12.0625	0.0447854		2772.05	11.6429	0.0432242
2849.36	12.1964	0.0452826		2773.67	16.5	0.0612563
2850.97	11.8393	0.0439567		2775.29	11.4643	0.0425612
2852.57	11.9554	0.0443876		2776.91	12.7143	0.0472018
2854.17	13.2054	0.0490286		2778.52	12.6071	0.0468041
2855.77	12.0625	0.0447854		2780.14	13.25	0.0491907
2857.36	11.6786	0.04336		2781.75	13.8571	0.0514447
2858.96	12.1696	0.0451832		2783.37	11.2143	0.0416331
2860.56	11.6696	0.0433268		2784.99	11.8929	0.0441523
2862.16	11.9643	0.0444208		2786.6	11.7143	0.0434893
2863.76	11.3393	0.0421003		2788.21	12.4286	0.0461411
2865.36	10.7411	0.0398792		2789.83	13.1071	0.0486603
2866.95	12.25	0.0454815		2791.44	11.4643	0.0425612
2868.55	12.2946	0.0456473		2793.06	12.3214	0.0457433
2870.15	11.1786	0.0415036		2794.67	11.3929	0.042296
2871.74	10.1161	0.0375587		2796.28	11.9643	0.0444175
2873.34	11.5179	0.0427633		2797.89	11.1786	0.0415005
2874.93	10.8214	0.0401776		2799.51	12.8214	0.0475996
				2801.12	13.6429	0.0506492
				2802.73	11.8929	0.0441523
				2804.34	11.0714	0.0411027
				2805.95	10.2857	0.0381858
				2807.56	8.28571	0.0307607
				2809.17	10.8929	0.0404398
				2810.78	8.10714	0.0300978
				2812.39	13.3214	0.0494559
				2814	9.03571	0.0335451
				2815.61	10.25	0.0380532
				2817.22	12.6786	0.0470692
				2818.82	11.1429	0.0413679
				2820.43	9.82143	0.0364621
				2822.04	11.8929	0.0441523
				2823.64	11.4643	0.0425612
				2825.25	8.75	0.0324844
				2826.86	9.82143	0.0364621
				2828.46	10.5	0.0389813
				2830.07	8.85714	0.0328822
				2831.67	8.82143	0.0327496
				2833.28	10.25	0.0380532
				2834.88	10.0714	0.0373902
				2836.49	11.2857	0.0418983
				2838.09	12.2143	0.0453456
				2839.69	10.3214	0.0383183
				2841.3	8.82143	0.0327496
				2842.9	12.3571	0.0458759
				2844.5	14.0357	0.0521076
				2846.1	10.6429	0.0395116
				2847.7	11.2857	0.0418983
				2849.31	11.1786	0.0415005
				2850.91	8.64286	0.0320866
				2852.51	9.10714	0.0338103
				2854.11	12.6786	0.0470692
				2855.71	11.7857	0.0437545
				2857.31	8.21429	0.0304956
				2858.91	8.89286	0.0330148
				2860.5	10.8929	0.0404398
				2862.1	9.32143	0.0346058
				2863.7	8.60714	0.031954
				2865.3	9.67857	0.0359317
				2866.9	8.03571	0.0298326
				2868.49	8.64286	0.0320866
				2870.09	8.46429	0.0314237
				2871.69	8.57143	0.0318215
				2873.28	8.53571	0.0316889
				2874.88	9.17857	0.0340755
				2876.47	9.17857	0.0340755
				2878.07	8.53571	0.0316889
				2879.66	9.82143	0.0364621
				2881.26	7.85714	0.0291697
				2882.85	7.75	0.0287719
				2884.44	9.5	0.0352688
				2886.04	8.67857	0.0322192
				2887.63	8.92857	0.0331474
				2889.22	12.7143	0.0472018
				2890.81	11	0.0408375
				2892.41	9.60714	0.0356666
				2894	8.89286	0.0330148
				2895.59	9	0.0334125
				2897.18	11.6429	0.0432242
				2898.77	12.0357	0.0446826
				2900.36	6.85714	0.0254572
				2901.95	9.78571	0.0363295
				2903.54	7.5	0.0278438
				2905.13	7.71429	0.0286393
				2906.72	8.78571	0.032617
				2908.31	11	0.0408375
				2909.89	8.53571	0.0316889
				2911.48	10.3571	0.0384509
				2913.07	9.89286	0.0367273
				2914.66	9.10714	0.0338103
				2916.24	12.3571	0.0458759
				2917.83	7.82143	0.0290371
				2919.41	8.57143	0.0318215
				2921	8.89286	0.0330148

## Sheet: Figure 3b
CH3 SAM			F SAM
Uncorrected Omega_G (cm-1)	Uncorrected Delta(D/G)		Uncorrected Omega_G (cm-1)	Uncorrected Delta(D/G)
1585.46	0.0335839		1585.89	0.08865
1582.94	0.061566		1586.61	0.056552
1586.17	0.0532563		1592.94	0.032578
1587.34	0.0521819		1593.08	0
1586.3	0.160493		1592.78	0.00578709
1587.24	0.0357449		1592.77	0.0157846
1585.92	0.0516618		1589.87	-0.00944191
1586.58	0.0149888
1588.3	0.0373694

## Sheet: Figure 3c
CH3 SAM			F SAM
Omega_G (cm-1)	Omega_2D (cm-1)		Omega_G (cm-1)	Omega_2D (cm-1)
1585.46	2676.87		1585.89	2679.27
1582.94	2672.31		1586.61	2680.48
1586.17	2678.51		1592.94	2684.72
1587.34	2679.75		1593.08	2684.41
1586.3	2680.79		1592.78	2684.51
1587.24	2681.1		1592.77	2683.75
1585.92	2680.22		1589.87	2682.85
1586.58	2678.8
1588.3	2679.73

## Sheet: Figure 3d
CH3 SAM			F SAM
Corrected Omega_G (cm-1)	Corrected Delta(D/G)		Corrected Omega_G (cm-1)	Corrected Delta(D/G)
1582.41	0.0260394		1581.53	0.062946
1581.82	0.0437856		1581.76	0.0281179
1582.36	0.0346927		1587.63	0.0201653
1583.17	0.0414306		1588	0
1581.16	0.108		1587.54	0.00301451
1582.22	0.0180357		1587.99	0.0092836
1580.99	0.0516618		1584.67	-0.00874573
1582.74	0.00948362
1584.46	0.025853

## Sheet: Figure S1
Wavelength (nm)	Relative radiation irradiance (%)
200.4	1.70132
200.8	1.70132
202.4	3.02458
202.8	3.02458
203.6	3.11909
204	2.93006
204.4	3.59168
206	1.32325
206.8	2.26843
209.6	1.51229
210	1.32325
210.8	1.79584
211.2	1.79584
211.6	1.60681
214.4	1.89036
214.8	1.98488
215.2	1.89036
217.6	1.32325
222.8	1.32325
228.4	1.22873
228.8	1.22873
233.2	1.79584
235.2	1.22873
235.6	1.32325
236	1.32325
238.4	1.89036
238.8	1.60681
239.2	1.41777
239.6	1.22873
242	1.79584
242.4	1.60681
242.8	1.60681
243.2	1.32325
246	1.70132
246.4	1.60681
247.2	2.93006
248.8	2.45747
249.2	1.89036
249.6	1.89036
250	1.98488
252.8	1.22873
253.2	1.13422
253.6	1.13422
255.2	2.17391
256	1.79584
256.4	1.0397
256.8	1.0397
257.2	1.0397
258.8	1.41777
260	1.41777
260.4	1.51229
260.8	1.51229
263.2	1.13422
263.6	1.22873
264	1.22873
264.4	1.79584
266.8	1.60681
267.2	1.51229
267.6	1.41777
269.2	1.70132
270.4	1.0397
270.8	1.0397
271.2	1.0397
274	1.0397
274.4	1.0397
274.8	1.13422
277.2	1.22873
277.6	1.13422
278	1.13422
280.8	1.51229
281.2	1.51229
281.6	1.51229
284.4	1.0397
284.8	1.0397
285.2	1.0397
288	1.13422
288.4	1.41777
288.8	1.89036
291.6	1.32325
292	1.22873
294.4	2.36295
294.8	2.74102
295.2	3.6862
295.6	4.06427
298.4	3.87524
298.8	3.6862
299.2	3.6862
299.6	1.70132
300	2.36295
300.8	5.19849
302	6.52174
302.4	6.61626
302.8	6.42722
303.6	4.44234
304.4	3.78072
305.6	2.83554
306	2.74102
306.4	2.55199
308.8	2.45747
309.2	2.93006
309.6	3.21361
310	4.44234
310.8	9.64083
311.2	12.0983
312.4	18.9036
312.8	19.3762
313.2	19.2817
314	15.0284
314.8	9.26276
315.6	6.71077
316	5.86011
316.4	4.7259
316.8	4.15879
319.6	2.17391
320	2.17391
320.4	2.07939
323.2	1.70132
323.6	1.79584
326.4	1.70132
326.8	1.70132
327.2	1.79584
330	1.79584
330.4	1.98488
330.8	1.98488
331.6	2.6465
332.4	6.52174
332.8	8.79017
333.2	9.64083
333.6	9.64083
334	10.2079
334.4	9.92439
336	9.92439
336.8	6.80529
337.2	3.78072
337.6	3.59168
338	3.6862
339.2	5.7656
339.6	5.48204
340.4	3.11909
340.8	2.83554
341.2	2.74102
342.8	3.6862
344	2.55199
344.4	2.36295
344.8	2.26843
347.6	2.55199
348	2.55199
348.4	2.55199
350	1.60681
350.4	1.32325
350.8	1.32325
351.2	2.6465
351.6	2.6465
352	2.6465
352.8	3.96975
353.6	4.91493
354.4	4.44234
354.8	4.44234
358	4.82042
358.4	5.38752
358.8	6.04915
360	9.64083
360.4	11.0586
360.8	13.8941
361.2	16.2571
361.6	22.6843
362	27.4102
362.4	37.7127
362.8	51.2287
363.2	64.9338
364	100
364.4	98.1096
364.8	99.1493
365.2	94.4234
365.6	93.1947
366	91.5879
366.8	63.327
367.2	46.7864
367.6	45.3686
368.4	29.8677
368.8	28.7335
369.2	25.6144
369.6	18.62
370	16.6352
371.2	11.9093
372	10.4915
372.4	9.92439
372.8	10.397
374.8	8.97921
375.2	8.79017
375.6	6.42722
376	6.14367
376.4	6.04915
378.8	7.65595
379.2	5.86011
379.6	5.48204
380	5.19849
381.6	5.95463
382	5.95463
382.4	5.57656
382.8	4.15879
383.2	4.06427
383.6	3.96975
385.2	4.82042
386	3.59168
386.4	3.40265
386.8	3.40265
389.6	3.30813
390	3.30813
390.4	3.30813
393.2	3.02458
393.6	3.02458
394	3.02458
396.8	3.21361
397.2	3.30813
397.6	3.30813
400	3.6862
400.4	3.49716
400.8	4.06427
401.2	5.95463
402	10.8696
402.4	21.7391
402.8	26.6541
403.6	29.8677
404	30.3403
404.4	30.3403
404.8	22.8733
405.2	22.4008
406.4	12.1928
406.8	12.0983
407.2	10.4915
407.6	9.16824
408	8.03403
410.4	4.82042
410.8	3.87524
411.2	3.6862
411.6	3.49716
414.4	2.6465
414.8	2.6465
415.2	2.6465
417.6	2.55199
418	2.55199
421.2	2.36295
421.6	2.36295
422	2.26843
424.8	2.55199
425.2	2.55199
425.6	2.55199
428.4	3.02458
428.8	3.11909
429.2	3.30813
430.8	4.63138
431.6	6.04915
432	7.56144
432.4	9.26276
432.8	15.7845
433.2	22.9679
433.6	31.9471
434	38.7524
434.4	42.344
434.8	42.344
435.2	42.2495
435.6	42.2495
436	42.4386
436.4	28.7335
437.2	17.7694
437.6	14.8393
438	13.8941
438.4	9.92439
438.8	9.82987
439.2	8.50662
439.6	8.79017
440.4	4.91493
442	5.48204
442.4	3.6862
442.8	3.49716
443.2	3.30813
444.4	2.55199
444.8	3.6862
446	2.26843
446.4	2.07939
449.2	1.79584
449.6	1.79584
450	1.79584
450.8	1.70132
451.2	1.32325
452.8	1.41777
453.2	1.41777
453.6	1.32325
456.4	1.0397
456.8	1.0397
457.2	1.0397
460	0.661626
460.4	0.661626
460.8	0.756144
463.2	0.661626
463.6	0.661626
464	0.661626
466.8	0.567108
467.2	0.567108
467.6	0.567108
470.4	0.378072
470.8	0.378072
471.2	0.378072
474	0.378072
474.4	0.378072
474.8	0.378072
477.2	0.378072
477.6	0.378072
478	0.378072
480.8	0.378072
481.2	0.378072
481.6	0.378072
484.4	0.378072
484.8	0.378072
485.2	0.378072
488	0.378072
488.4	0.378072
488.8	0.378072
491.6	0.378072
492	0.378072
494.8	0.378072
495.2	0.378072
495.6	0.378072
498.4	0.378072
498.8	0.378072
499.2	0.378072
502.8	0.378072
504	0.283554
505.6	0.283554
506	0.283554
506.4	0.283554
508	0.283554
508.4	0.283554
508.8	0.283554
509.2	0.283554
509.6	0.283554
512.4	0.283554
512.8	0.283554
513.2	0.283554
516	0.283554
516.4	0.283554
516.8	0.283554
519.6	0.283554
520	0.283554
520.4	0.283554
522	0.283554
523.2	0.283554
523.6	0.283554
526.4	0.283554
526.8	0.283554
527.2	0.283554
530	0.283554
530.4	0.283554
530.8	0.283554
533.6	0.283554
534	0.283554
534.4	0.283554
534.8	0.189036
535.2	0.189036
535.6	0.189036
537.2	0.283554
537.6	0.283554
538	0.283554
538.4	0.189036
538.8	0.189036
540.4	0.47259
540.8	0.567108
541.2	0.756144
541.6	1.41777
542.4	2.74102
542.8	3.59168
543.2	3.87524
543.6	4.25331
544	4.06427
544.4	3.96975
544.8	3.78072
545.2	3.21361
547.6	1.89036
548	1.70132
548.4	1.51229
551.6	0.661626
554.4	0.283554
554.8	0.283554
555.2	0.283554
558	0.283554
558.4	0.283554
558.8	0.283554
561.6	0.283554
562	0.283554
562.4	0.283554
565.2	0.283554
565.6	0.283554
566	0.283554
566.8	0.283554
567.2	0.283554
568.8	0.283554
569.2	0.283554
570.8	0.661626
572	0.94518
572.8	1.51229
575.6	2.36295
576	2.36295
576.4	2.36295
579.2	1.41777
579.6	1.22873
580	1.22873
582.8	0.756144
583.2	0.661626
583.6	0.661626
586	0.567108
586.4	0.567108
586.8	0.567108
589.6	0.47259
590	0.47259
590.4	0.47259
590.8	0.378072
591.6	0.378072
593.2	0.47259
593.6	0.47259
594	0.47259
594.4	0.378072
594.8	0.378072
596.8	0.47259
597.2	0.47259
597.6	0.47259
598	0.378072
598.4	0.378072
599.2	0.378072

## Sheet: Figure S2
C1				C2				C3				C4				C5				C6				C7				C8				C9
Before		After		Before		After		Before		After		Before		After		Before		After		Before		After		Before		After		Before		After		Before		After
Raman shift (cm-1)	Intensity (arb. Unit)	Raman shift (cm-1)	Intensity (arb. Unit)	Raman shift (cm-1)	Intensity (arb. Unit)	Raman shift (cm-1)	Intensity (arb. Unit)	Raman shift (cm-1)	Intensity (arb. Unit)	Raman shift (cm-1)	Intensity (arb. Unit)	Raman shift (cm-1)	Intensity (arb. Unit)	Raman shift (cm-1)	Intensity (arb. Unit)	Raman shift (cm-1)	Intensity (arb. Unit)	Raman shift (cm-1)	Intensity (arb. Unit)	Raman shift (cm-1)	Intensity (arb. Unit)	Raman shift (cm-1)	Intensity (arb. Unit)	Raman shift (cm-1)	Intensity (arb. Unit)	Raman shift (cm-1)	Intensity (arb. Unit)	Raman shift (cm-1)	Intensity (arb. Unit)	Raman shift (cm-1)	Intensity (arb. Unit)	Raman shift (cm-1)	Intensity (arb. Unit)	Raman shift (cm-1)	Intensity (arb. Unit)
1206.88	18.772	1172.96	28.0287	1145.1	27.25	1151.44	29.6	1136.01	29.5741	1132.12	33.9659	1141.55	35.5476	1151.78	32.8571	1166.12	64.7857	1158.23	26.3393	1124.78	36.75	1118.22	31.15	1145.26	30.8333	1095.19	33.7143	1059.85	60.075	1111.59	35.8929	1107.97	40.1042	1126.2	29.9875
1208.85	17.5106	1174.94	29.2644	1147.09	32.375	1153.42	30.45	1138	29.1574	1134.11	34.9545	1143.54	36.6667	1153.77	32.7381	1168.11	61.9196	1160.22	25.9107	1126.78	34.075	1120.22	32.35	1147.25	29.8333	1097.19	37.5	1061.86	60.775	1113.58	33.8571	1109.97	36.0833	1128.2	34.725
1210.83	18.7447	1176.92	28.4655	1149.08	26.125	1155.41	27.975	1139.99	30.5741	1136.1	33.0568	1145.53	37.0238	1155.76	30.6667	1170.09	62.5	1162.2	26.625	1128.77	34.55	1122.21	31.85	1149.24	30.0833	1099.19	33	1063.87	60.825	1115.58	33.2857	1111.96	41.0625	1130.19	32.775
1212.8	17.1307	1178.91	26.0862	1151.06	29.6875	1157.4	27.3	1141.98	26.8611	1138.09	32.3295	1147.52	35.2619	1157.75	28.5952	1172.07	61.4018	1164.19	25.1607	1130.77	35	1124.21	31.875	1151.23	30.5833	1101.19	31.2857	1065.88	61.2125	1117.58	33.2321	1113.96	38.1875	1132.18	32.6125
1214.77	17.6322	1180.89	27.5057	1153.05	31.1875	1159.39	24.6	1143.97	26.7593	1140.08	31.6136	1149.51	31.7857	1159.73	29.5476	1174.06	62.2857	1166.17	26.0982	1132.76	32.4	1126.2	29.825	1153.21	35.0833	1103.19	31.6429	1067.89	60.3625	1119.57	34.8929	1115.96	38.6458	1134.18	30.15
1216.75	17.5714	1182.87	26.9598	1155.04	24.25	1161.37	27.75	1145.96	27.9074	1142.07	30.5341	1151.5	30.6667	1161.72	29.2381	1176.04	59.9196	1168.16	24.9018	1134.75	33	1128.19	31.025	1155.2	32.8333	1105.19	36.4286	1069.9	61.6875	1121.57	31.9107	1117.95	36.6458	1136.17	32.2625
1218.72	17.3982	1184.85	26.1954	1157.03	24.8125	1163.36	26.775	1147.95	27	1144.06	32.1136	1153.49	34.4524	1163.7	28.619	1178.02	59.1518	1170.14	24.1964	1136.74	32.775	1130.19	32.125	1157.19	25.75	1107.18	34.1429	1071.9	59.3875	1123.56	33.1429	1119.95	38.125	1138.16	28.9125
1220.69	16.3191	1186.83	25.3276	1159.01	29.25	1165.34	26.675	1149.94	27.1296	1146.05	30.2614	1155.47	32.8571	1165.69	30	1180	60.3661	1172.12	25.1518	1138.73	34.075	1132.18	31.25	1159.17	28.9167	1109.18	33.7143	1073.91	56.8875	1125.56	34.1786	1121.95	36.1042	1140.15	28.25
1222.66	16.6991	1188.81	25.4885	1161	28.8125	1167.33	25.1	1151.93	26.6667	1148.04	29.5227	1157.46	30.1667	1167.67	31.1667	1181.98	59.0536	1174.11	22.625	1140.72	32.175	1134.17	30.2	1161.16	29.4167	1111.18	31.5	1075.92	54.525	1127.55	31.5179	1123.94	35.9792	1142.14	28.625
1224.63	16.4195	1190.79	26.2011	1162.98	23.8125	1169.31	23.2	1153.92	25.2778	1150.03	30.3636	1159.45	31.6905	1169.66	26.9286	1183.96	58.5446	1176.09	23.0446	1142.71	29.175	1136.16	30.75	1163.15	29.8333	1113.18	31.5714	1077.92	54.375	1129.55	31.2857	1125.93	36.1667	1144.13	28.775
1226.6	17.3374	1192.76	24.6839	1164.97	25.5	1171.29	22.875	1155.9	26.2407	1152.02	28.0568	1161.43	30.5238	1171.64	27.8571	1185.94	60.5089	1178.07	24.3393	1144.7	34.425	1138.15	30.2	1165.13	30.9167	1115.17	32.7143	1079.93	52.4	1131.54	31.75	1127.93	35.8542	1146.12	25.15
1228.57	16.8967	1194.74	23.6609	1166.95	27.4375	1173.28	27.2	1157.89	22.7685	1154.01	28.0909	1163.42	30.1667	1173.62	26.2381	1187.92	60.1786	1180.05	23.0357	1146.69	31.6	1140.15	28.05	1167.11	22.1667	1117.17	27.7857	1081.93	52.275	1133.53	29.9286	1129.92	38.3125	1148.11	29.1625
1230.54	16.4195	1196.72	25.4425	1168.94	24.75	1175.26	22.325	1159.88	24.2037	1155.99	28.0341	1165.4	28.119	1175.6	27.6905	1189.9	59.1071	1182.03	22.9911	1148.68	27.425	1142.14	29.1	1169.1	20	1119.17	31.4286	1083.94	48.4	1135.52	30.3393	1131.91	35.7083	1150.1	29.6625
1232.51	15.0304	1198.7	25.0172	1170.92	31.125	1177.24	24.2	1161.86	24.3519	1157.98	27.625	1167.39	26.3333	1177.59	27.0238	1191.88	60.0982	1184.01	22.5446	1150.67	27.9	1144.13	29.925	1171.08	19.4167	1121.16	30.7857	1085.94	49.5125	1137.51	29.25	1133.91	35.8125	1152.08	24.1125
1234.48	15.4681	1200.67	25.4885	1172.9	24.375	1179.22	22.875	1163.85	21.8981	1159.97	26.3523	1169.37	29.0238	1179.57	25.2143	1193.86	59.9732	1185.99	22.8661	1152.66	28.85	1146.11	28.225	1173.07	28.6667	1123.16	27.7857	1087.94	47.1625	1139.5	30.5536	1135.9	35.4583	1154.07	24.0625
1236.45	15.0122	1202.65	24.4368	1174.89	23.75	1181.2	23.425	1165.83	19.9259	1161.95	25.6705	1171.35	25.1667	1181.55	24.119	1195.84	60.125	1187.97	23.1786	1154.65	25.25	1148.1	24.625	1175.05	24.1667	1125.15	27.1429	1089.95	43.7	1141.5	28.25	1137.89	35.6458	1156.06	27.2875
1238.41	15.6109	1204.62	23.7931	1176.87	27.0625	1183.18	21.15	1167.82	22.537	1163.94	25.3182	1173.34	26.881	1183.53	24.381	1197.81	58.6071	1189.95	22.3839	1156.63	28.85	1150.09	23.9	1177.03	24.4167	1127.15	26.8571	1091.95	43.8375	1143.49	30.9107	1139.88	31.7083	1158.05	24.7375
1240.38	15.6687	1206.6	24.1954	1178.85	29.1875	1185.16	22	1169.8	23.5185	1165.92	26.4432	1175.32	28.0714	1185.51	26.9524	1199.79	59.4196	1191.93	20.8482	1158.62	26.375	1152.08	27.6	1179.01	22.9167	1129.14	31.5	1093.95	40.0125	1145.48	28.2143	1141.87	31.9167	1160.03	23.475
1242.35	15.6839	1208.57	24.4138	1180.83	25.8125	1187.14	20.525	1171.78	22.7222	1167.91	25.2955	1177.3	27.2857	1187.49	26.0714	1201.77	59.5268	1193.91	20.6875	1160.6	26.75	1154.07	26.5	1180.99	30	1131.13	33.7857	1095.95	41.85	1147.46	26.3036	1143.86	34.9167	1162.02	25.225
1244.31	14.4407	1210.55	21.4253	1182.81	25.25	1189.12	20.9	1173.77	20.3889	1169.89	25.2045	1179.28	27.381	1189.47	23.7381	1203.74	58.1696	1195.88	21.7054	1162.59	26	1156.05	25.3	1182.97	23.25	1133.12	26.9286	1097.95	40.3125	1149.45	25.5893	1145.85	30.1875	1164	26.825
1246.28	15.0851	1212.52	23.1667	1184.79	22.4375	1191.1	18.325	1175.75	21.1481	1171.87	25.6705	1181.26	27.3095	1191.45	23.881	1205.72	58.7946	1197.86	21.5982	1164.58	28.05	1158.04	21.95	1184.95	23.1667	1135.12	29.2857	1099.95	39.025	1151.44	28.8929	1147.84	32.1042	1165.99	22.1375
1248.25	14.231	1214.5	22.3621	1186.77	27.8125	1193.08	21.025	1177.73	22.5185	1173.86	26.8636	1183.24	23.5	1193.42	23.4524	1207.69	57.7946	1199.84	21.4732	1166.56	25.925	1160.03	20.575	1186.93	21.1667	1137.11	30.6429	1101.95	39.975	1153.43	25.9821	1149.83	31.8333	1167.97	22.6625
1250.21	14.7842	1216.47	22.7644	1188.75	19.75	1195.06	21.325	1179.71	19.8889	1175.84	23.9773	1185.22	25.0714	1195.4	24.7857	1209.67	56.8929	1201.81	20.6339	1168.54	26.4	1162.01	24.375	1188.91	21.9167	1139.1	27.7857	1103.95	38.975	1155.42	26.9643	1151.82	32.3542	1169.96	23.325
1252.17	13.7508	1218.44	22.8103	1190.73	26.6875	1197.04	21.925	1181.69	19.3148	1177.82	23.6023	1187.2	23.3571	1197.38	22.8095	1211.64	58.9464	1203.79	21.7768	1170.53	25.05	1164	22.85	1190.89	19.9167	1141.09	21.2143	1105.95	37.15	1157.4	27	1153.8	27.875	1171.94	23.2
1254.14	14.1611	1220.41	21.9425	1192.71	25	1199.01	21.625	1183.67	20.2963	1179.8	22.6477	1189.18	25.619	1199.36	22.5	1213.61	59.2321	1205.77	19.1518	1172.51	26.975	1165.98	20.2	1192.87	19.6667	1143.08	24.7143	1107.95	39.2875	1159.39	25.7321	1155.79	30.5208	1173.92	21.2875
1256.1	14.0608	1222.38	21.9885	1194.69	23.9375	1200.99	19.075	1185.65	19.5833	1181.78	24.375	1191.16	23.7381	1201.33	23.7619	1215.59	57.7411	1207.74	20.3393	1174.49	24.325	1167.97	23.375	1194.85	24.75	1145.07	26.9286	1109.95	38.875	1161.37	24.6964	1157.78	29.9583	1175.9	22.6625
1258.06	14.7812	1224.35	22.1149	1196.66	19.4375	1202.96	19.575	1187.63	22.1389	1183.76	24.2955	1193.14	27.619	1203.31	21.8333	1217.56	56.5089	1209.71	19.9821	1176.48	23.925	1169.95	22.175	1196.82	24.25	1147.06	26.7857	1111.95	41.3125	1163.36	23.5536	1159.76	26.2292	1177.89	20.95
1260.03	14.8602	1226.32	20.9368	1198.64	18.8125	1204.94	22.35	1189.61	19.1481	1185.74	23.2955	1195.12	26.1429	1205.28	23.6667	1219.53	57.6875	1211.69	19.8214	1178.46	24.85	1171.93	22.6	1198.8	20.8333	1149.05	23.8571	1113.94	39.6875	1165.34	22.375	1161.75	29.3958	1179.87	18.9125
1261.99	14.8176	1228.29	22.6724	1200.62	21.875	1206.92	18.15	1191.59	18.8333	1187.72	23.2159	1197.09	25.6667	1207.26	22.5	1221.5	58.0625	1213.66	20.0446	1180.44	22.95	1173.92	22.15	1200.78	20.8333	1151.04	22.9286	1115.94	36.7375	1167.33	23.5714	1163.74	25.7708	1181.85	20.525
1263.95	14.155	1230.26	21.5747	1202.59	19.875	1208.89	20.525	1193.57	20.5185	1189.7	21.3523	1199.07	24.4286	1209.23	23	1223.47	55.7857	1215.63	21	1182.42	22	1175.9	20.725	1202.75	26.0833	1153.02	23.1429	1117.94	39.1375	1169.31	21.5714	1165.72	26.8542	1183.83	22.5625
1265.91	14.2888	1232.23	22.0747	1204.57	24.875	1210.86	19.15	1195.55	18.1204	1191.68	22.5682	1201.05	24.619	1211.21	24.0238	1225.44	55.2857	1217.61	19.1339	1184.4	23.25	1177.88	23.15	1204.73	24.8333	1155.01	25.7143	1119.93	39.3625	1171.3	24.0536	1167.7	25.2292	1185.81	19.25
1267.87	13.7052	1234.2	20.5345	1206.54	23.1875	1212.84	18.2	1197.52	17.4074	1193.66	22.3523	1203.02	23.5714	1213.18	22.0476	1227.41	54.9464	1219.58	20.2857	1186.38	21.925	1179.86	20.625	1206.7	24.25	1157	20.6429	1121.93	37.95	1173.28	21.2321	1169.69	26.6458	1187.79	19.9625
1269.83	14.8784	1236.17	20.4195	1208.52	24.9375	1214.81	18.3	1199.5	19.2963	1195.64	21.9545	1205	22.7143	1215.15	23.7381	1229.38	58.2232	1221.55	18.9911	1188.36	19.025	1181.84	20.425	1208.68	21.3333	1158.98	21.8571	1123.92	35.35	1175.26	24.3214	1171.67	27.25	1189.77	22.4875
1271.79	13.1976	1238.14	21.3161	1210.49	24.0625	1216.78	18.175	1201.48	21.0556	1197.61	21.75	1206.97	24.2619	1217.13	24.6905	1231.35	53.7143	1223.52	17.9286	1190.34	21.15	1183.82	21.35	1210.65	20.8333	1160.97	22.9286	1125.92	36.8	1177.24	21.5893	1173.65	22.7917	1191.75	18.75
1273.75	14.3739	1240.1	22.5172	1212.47	19.375	1218.76	19.55	1203.45	19.2222	1199.59	20.4432	1208.95	25.5238	1219.1	24.3333	1233.32	56.9554	1225.49	17.5	1192.32	23.425	1185.8	18.35	1212.63	20.5	1162.96	27.8571	1127.91	37.15	1179.23	21.7857	1175.64	23.75	1193.72	18.2625
1275.71	13.5167	1242.07	19.8621	1214.44	19.125	1220.73	21.45	1205.43	15.9167	1201.57	21.5341	1210.92	23.2857	1221.07	21.1667	1235.29	55.0357	1227.46	18.5268	1194.29	20.775	1187.78	19.1	1214.6	21.3333	1164.94	18.4286	1129.9	37.6125	1181.21	19.6964	1177.62	21.7292	1195.7	19.775
1277.67	14.7872	1244.04	21.1724	1216.41	18.125	1222.7	18.55	1207.4	17.4444	1203.54	21.5227	1212.9	21.5238	1223.04	22.381	1237.26	55.125	1229.43	18.3125	1196.27	19.375	1189.76	20.95	1216.57	23.0833	1166.92	20.8571	1131.9	38.075	1183.19	21.7857	1179.6	21.8958	1197.68	16.65
1279.63	13.2249	1246	19.8161	1218.39	18.3125	1224.67	17.9	1209.38	18.6019	1205.52	21.1591	1214.87	20.9286	1225.01	21.5	1239.23	56.2857	1231.4	18.4375	1198.25	21.925	1191.74	18.375	1218.55	20.1667	1168.91	22.4286	1133.89	38.225	1185.17	20.2143	1181.58	21.1667	1199.66	17.2625
1281.58	14.1398	1247.97	20.8563	1220.36	23.1875	1226.64	18.8	1211.35	17.5833	1207.49	20.2614	1216.84	24.2381	1226.98	22.619	1241.19	56.2143	1233.37	17.9464	1200.23	23.425	1193.72	20.85	1220.52	18.3333	1170.89	20.2857	1135.88	35.5625	1187.15	19.6071	1183.56	22.9375	1201.63	17.3875
1283.54	13.3678	1249.93	20.9598	1222.33	17.25	1228.61	17.4	1213.33	16.3796	1209.47	20.9318	1218.81	20.5476	1228.95	21.619	1243.16	56.7679	1235.34	19.1161	1202.2	18.35	1195.7	19.275	1222.49	20.75	1172.88	16.6429	1137.87	35.175	1189.13	19.9464	1185.54	21.375	1203.61	17.3625
1285.5	14.3739	1251.9	20.0345	1224.3	18.6875	1230.58	17.225	1215.3	17.5926	1211.44	19.1932	1220.79	19.7619	1230.92	21.2857	1245.12	56.3571	1237.31	16.5625	1204.18	21.025	1197.67	17.2	1224.46	18	1174.86	20.9286	1139.86	31.875	1191.11	22.2143	1187.52	22.2708	1205.58	16.4125
1287.45	13.0699	1253.86	19.5287	1226.27	23.9375	1232.55	17.45	1217.27	15.9907	1213.42	20.5	1222.76	22.0238	1232.89	22.4762	1247.09	55.3036	1239.27	17.0714	1206.15	19.425	1199.65	19.4	1226.43	20.25	1176.84	22.0714	1141.85	32.9	1193.08	19.8571	1189.5	22.5	1207.56	16.05
1289.41	13.69	1255.82	20.9655	1228.24	15	1234.52	13.575	1219.24	17.0185	1215.39	18.875	1224.73	21.1905	1234.86	19.4048	1249.06	54.5357	1241.24	16.3304	1208.13	20.75	1201.63	15.6	1228.4	22.75	1178.82	23.2857	1143.84	32.05	1195.06	20.4821	1191.48	21.2708	1209.53	18.0875
1291.36	13.3313	1257.79	18.7241	1230.21	16.5	1236.48	19	1221.21	16.8426	1217.36	19.7386	1226.7	20.4048	1236.83	21.0238	1251.02	54.2054	1243.21	18.25	1210.1	18.075	1203.6	17.925	1230.37	23.4167	1180.8	21.9286	1145.83	33.4	1197.04	18.4821	1193.46	22.5417	1211.51	17.6375
1293.32	13.9362	1259.75	19.9943	1232.18	19.6875	1238.45	20	1223.19	16.6944	1219.33	18.4773	1228.67	20.7619	1238.79	21.8333	1252.98	55.0804	1245.17	16.0446	1212.08	18.65	1205.58	17.15	1232.34	19	1182.78	17.1429	1147.82	30.6375	1199.02	19.375	1195.44	21.25	1213.48	16.6
1295.27	13.9453	1261.71	19.3793	1234.15	20.3125	1240.42	18.9	1225.16	14.713	1221.3	19.0341	1230.64	19.619	1240.76	20.9524	1254.95	54.0714	1247.14	17.2857	1214.05	18.275	1207.55	15.825	1234.31	19.3333	1184.76	18.9286	1149.81	32.025	1200.99	18.6786	1197.41	22.6042	1215.45	17.7
1297.23	13.3951	1263.67	19.5517	1236.11	20.9375	1242.39	16.35	1227.13	16.5926	1223.28	17.9205	1232.61	20.2381	1242.73	19.6905	1256.91	52.1161	1249.1	17.8482	1216.02	17.15	1209.53	19.85	1236.27	22.0833	1186.74	24.7143	1151.8	30.875	1202.97	19.4107	1199.39	18.8958	1217.43	17.4
1299.18	13.3161	1265.64	20.3046	1238.08	21.625	1244.35	17.775	1229.1	17.1574	1225.25	17.8182	1234.57	17.3095	1244.69	22.0476	1258.87	54.9464	1251.07	17.2679	1217.99	17.45	1211.5	18.225	1238.24	15.25	1188.72	17.5714	1153.79	30.7875	1204.94	16.6429	1201.37	21.2708	1219.4	15.2
1301.13	13.2219	1267.6	18.9023	1240.05	20.625	1246.32	17.1	1231.07	15.3796	1227.22	17.2273	1236.54	19.2143	1246.66	16.9524	1260.84	55.0625	1253.03	15.1696	1219.97	17.8	1213.47	15.375	1240.21	15.0833	1190.7	16.0714	1155.77	29.7125	1206.92	17.7679	1203.34	20.6875	1221.37	15.1125
1303.08	13.231	1269.56	18.546	1242.02	21.125	1248.28	18.375	1233.03	14.4907	1229.19	18.0682	1238.51	19.3571	1248.62	20.119	1262.8	53.6875	1254.99	15.4554	1221.94	17.95	1215.45	16.45	1242.18	14.3333	1192.68	22.4286	1157.76	29.2625	1208.89	17.2679	1205.32	17.6875	1223.34	18.05
1305.04	13.304	1271.52	20.1897	1243.98	15.1875	1250.25	15.425	1235	15.9167	1231.16	17.2955	1240.48	18.5952	1250.59	21.6667	1264.76	56.6429	1256.96	16.4643	1223.91	17.3	1217.42	15.875	1244.14	16.25	1194.66	24.5	1159.75	26.075	1210.87	16.0536	1207.29	17.7708	1225.31	16.15
1306.99	13.1945	1273.47	17.8736	1245.95	17.1875	1252.21	14.675	1236.97	15.3333	1233.12	17.3523	1242.44	19.881	1252.55	19.4762	1266.72	56.7232	1258.92	15.2946	1225.88	17.6	1219.39	16.875	1246.11	14.25	1196.64	21.2143	1161.73	28.4	1212.84	17.4464	1209.27	17.2083	1227.28	14.575
1308.94	14.1976	1275.43	20.408	1247.91	21.125	1254.18	14.725	1238.94	14.5648	1235.09	16.0682	1244.41	16.381	1254.52	16.3095	1268.68	56.4821	1260.88	16.5268	1227.85	16.8	1221.36	17.05	1248.07	18.5	1198.61	15.8571	1163.72	28.6375	1214.81	17.3036	1211.24	17.5	1229.25	16.4625
1310.89	13.5897	1277.39	18.7414	1249.88	16.9375	1256.14	16.875	1240.91	15.5648	1237.06	16.625	1246.38	18.8333	1256.48	18.5714	1270.64	55.2054	1262.84	15.2232	1229.82	15.975	1223.33	14.5	1250.04	19.8333	1200.59	18.6429	1165.7	28.175	1216.79	16.5179	1213.21	19	1231.22	15.0625
1312.84	13.1277	1279.35	18.8391	1251.84	17.625	1258.1	16.05	1242.87	15.8426	1239.03	17.625	1248.34	17.8095	1258.44	19.119	1272.6	53.1518	1264.81	16.625	1231.79	16.725	1225.3	16.275	1252	13.1667	1202.56	16.5714	1167.69	25.65	1218.76	14.5179	1215.19	18.3125	1233.19	13.2625
1314.79	12.228	1281.31	19.6207	1253.81	18.5625	1260.06	15.75	1244.84	13.6667	1240.99	18.8977	1250.3	19.1905	1260.4	19.6905	1274.56	55.9821	1266.77	16.4554	1233.76	18.725	1227.27	14.5	1253.97	20	1204.54	15.7857	1169.67	28.2875	1220.73	17.6607	1217.16	22.4792	1235.16	14.95
1316.74	13.2705	1283.26	18.0115	1255.77	15.3125	1262.03	16.625	1246.8	13.3333	1242.96	16.1818	1252.27	17.4524	1262.37	17.2619	1276.52	55.6696	1268.73	17.0179	1235.72	16.35	1229.24	15.675	1255.93	24.8333	1206.52	15.1429	1171.65	24.8875	1222.7	19.3036	1219.13	16.0833	1237.12	15.925
1318.69	12.1489	1285.22	20.0977	1257.73	14.9375	1263.99	15.725	1248.77	13.6481	1244.93	17.0568	1254.23	17.881	1264.33	18.5238	1278.47	51.3571	1270.69	16.8839	1237.69	15.45	1231.21	16.175	1257.89	16.6667	1208.49	16.5714	1173.64	25.85	1224.67	18.0357	1221.1	17.7083	1239.09	14.8125
1320.63	13.2219	1287.18	19.8851	1259.7	20.6875	1265.95	14.425	1250.73	13.7315	1246.89	14.9205	1256.2	20.0238	1266.29	18.9048	1280.43	53.7946	1272.65	14.6875	1239.66	16.925	1233.18	13.15	1259.85	14.9167	1210.46	21	1175.62	23.1875	1226.64	14.6964	1223.07	18.625	1241.06	12.475
1322.58	12.0608	1289.13	18.4023	1261.66	17.125	1267.91	15.475	1252.7	14.4074	1248.86	17.1818	1258.16	15.5476	1268.25	19.4524	1282.39	54.0893	1274.6	16.1696	1241.63	15.375	1235.15	14.45	1261.82	11.1667	1212.44	18.1429	1177.6	24.3875	1228.61	16.7857	1225.05	15.5833	1243.03	16.0875
1324.53	13.9149	1291.09	19.3851	1263.62	16.5625	1269.87	15.025	1254.66	15.4352	1250.82	17.2614	1260.12	20.6667	1270.21	18.6667	1284.35	55.6696	1276.56	16.0625	1243.59	14.5	1237.12	16.225	1263.78	17.0833	1214.41	18.0714	1179.58	24.8125	1230.58	16.3393	1227.02	16.4375	1244.99	13.9
1326.48	12.6839	1293.04	17.7529	1265.58	16.875	1271.83	13.525	1256.62	13.5648	1252.79	17.0455	1262.08	18.381	1272.17	19.3333	1286.3	53.4286	1278.52	15.6518	1245.56	15.875	1239.09	14.075	1265.74	14.9167	1216.38	14.3571	1181.56	24.6125	1232.55	16.3571	1228.99	18.7292	1246.96	13.875
1328.42	12.6565	1295	18.977	1267.54	16.625	1273.79	15.75	1258.59	11.7685	1254.75	17.6591	1264.04	18.2381	1274.13	19.5238	1288.26	56.2946	1280.48	16.0625	1247.52	18.025	1241.05	14.3	1267.7	17	1218.36	16.0714	1183.54	23.875	1234.52	15.1607	1230.95	16.1875	1248.92	14.5
1330.37	13.1003	1296.95	19.3793	1269.5	18.5625	1275.75	16.275	1260.55	14.8981	1256.71	16.7727	1266.01	16	1276.08	18.4286	1290.21	54.5179	1282.44	16.0714	1249.49	15.425	1243.02	12.2	1269.66	17.5833	1220.33	12.9286	1185.52	23.9875	1236.49	14.9821	1232.92	17.8125	1250.89	15.375
1332.31	13.0061	1298.9	18.8908	1271.46	15.5625	1277.7	14.65	1262.51	15.9074	1258.68	15.2841	1267.97	16.6905	1278.04	19.119	1292.17	53.125	1284.39	16.5625	1251.45	14.8	1244.99	12.775	1271.62	18.6667	1222.3	13.8571	1187.5	22.975	1238.45	16.6071	1234.89	16.7292	1252.85	12.725
1334.26	12.2067	1300.86	18.6092	1273.42	22.3125	1279.66	13.75	1264.47	14.037	1260.64	16.7614	1269.93	17.1429	1280	17.9524	1294.12	55.9643	1286.35	15.1786	1253.42	14.325	1246.95	14.6	1273.58	22.75	1224.27	16.1429	1189.48	22.7875	1240.42	15.6429	1236.86	16.3542	1254.81	12.25
1336.2	13.6079	1302.81	18.6552	1275.38	16	1281.62	18.65	1266.43	16.0556	1262.6	17.1364	1271.89	18.9524	1281.96	21.1905	1296.08	57.3839	1288.3	16.0446	1255.38	14.625	1248.92	14.075	1275.54	17	1226.24	15.2857	1191.46	22.4625	1242.39	14.7679	1238.83	18.2917	1256.78	15.2
1338.15	13.5137	1304.76	18.3046	1277.34	16.8125	1283.58	17	1268.39	14.4259	1264.56	17.1023	1273.84	16.2381	1283.91	16.881	1298.03	55.5982	1290.26	16.6875	1257.34	15.525	1250.88	15.775	1277.5	17.75	1228.21	13	1193.44	23.225	1244.35	16.9464	1240.79	15.5	1258.74	15.35
1340.09	13.7964	1306.71	19.3218	1279.3	17.5625	1285.53	14.3	1270.35	16.3519	1266.52	14.9659	1275.8	15.4762	1285.87	19.1905	1299.98	56.4375	1292.21	14.8571	1259.31	14	1252.84	13.425	1279.45	17.3333	1230.18	11	1195.42	21.0625	1246.32	17.5179	1242.76	15.0625	1260.7	12.5
1342.03	13.4164	1308.66	17.5977	1281.25	14.375	1287.49	15.425	1272.31	13.4259	1268.48	16.3068	1277.76	16.0714	1287.83	17.3333	1301.93	54.4554	1294.17	16.6161	1261.27	14.975	1254.81	14.075	1281.41	17.1667	1232.15	14.2857	1197.39	22.2875	1248.28	13.8929	1244.73	14.5625	1262.66	14.125
1343.98	13.7872	1310.61	19.069	1283.21	13.125	1289.44	17.75	1274.27	14.3611	1270.44	16.8409	1279.72	18.3095	1289.78	21.119	1303.89	54.1696	1296.12	15.4643	1263.23	15.3	1256.77	17.325	1283.37	14.6667	1234.12	18	1199.37	20.95	1250.25	16.1786	1246.69	15.1875	1264.63	12.5
1345.92	13.2948	1312.56	18.1437	1285.17	16.8125	1291.4	16.55	1276.23	13.8333	1272.4	16.0341	1281.68	16.0952	1291.74	19.3095	1305.84	54.3036	1298.08	14.6339	1265.19	13.825	1258.73	14.2	1285.32	13.75	1236.09	14.0714	1201.35	22.1625	1252.21	12.2857	1248.66	14.9375	1266.59	12.9
1347.86	13.1854	1314.51	18.046	1287.12	14.9375	1293.35	14.3	1278.19	12.0093	1274.36	15.9318	1283.63	18.2619	1293.69	16.619	1307.79	55.3304	1300.03	14.75	1267.15	14.625	1260.7	13.925	1287.28	19.8333	1238.05	11.8571	1203.32	20.8125	1254.18	15.5536	1250.62	14.875	1268.55	14.5
1349.8	13.459	1316.46	19.2414	1289.08	13.6875	1295.31	14.825	1280.15	14.1111	1276.32	15.6932	1285.59	15.5238	1295.64	18.0238	1309.74	55.3125	1301.98	16.0982	1269.11	13.025	1262.66	14.775	1289.24	17.75	1240.02	12.4286	1205.3	21.45	1256.14	16.2143	1252.59	14.5625	1270.51	13.6125
1351.74	13.9422	1318.41	19.1494	1291.03	16.3125	1297.26	16.95	1282.1	14.537	1278.28	16.0114	1287.55	17.5238	1297.6	20.5238	1311.69	56.0357	1303.93	15.8036	1271.07	13.2	1264.62	12.125	1291.19	17.4167	1241.99	13.1429	1207.27	21.4	1258.1	14.5714	1254.55	14.1875	1272.47	13.4125
1353.68	13.0486	1320.36	18.1379	1292.99	20.3125	1299.22	17.525	1284.06	13.1296	1280.24	16.7841	1289.5	16.9762	1299.55	20.0476	1313.64	54.4196	1305.88	17.2679	1273.03	12.175	1266.58	13.05	1293.15	16.5	1243.95	13.8571	1209.25	20.675	1260.07	14.375	1256.51	13.9792	1274.42	12.6375
1355.62	13.1581	1322.31	20.0517	1294.94	16.3125	1301.17	17.775	1286.02	12.8056	1282.19	15.25	1291.46	15.381	1301.5	19.119	1315.59	55.1071	1307.84	16.0446	1274.99	14.375	1268.54	15.725	1295.1	14.6667	1245.92	14.0714	1211.22	18.9875	1262.03	14.1071	1258.48	15.8125	1276.38	14.5375
1357.56	13.2128	1324.25	18.6724	1296.9	14.5	1303.12	16.5	1287.97	13.3981	1284.15	16.5341	1293.41	15.7143	1303.46	18.5952	1317.54	53.9375	1309.79	16.8661	1276.95	13.675	1270.5	12.825	1297.05	15.8333	1247.88	12.2857	1213.2	20.2875	1263.99	13.9107	1260.44	13.2083	1278.34	12.5125
1359.5	13.4833	1326.2	19.5747	1298.85	20.25	1305.07	16.8	1289.93	13.713	1286.11	16.2159	1295.36	14.9762	1305.41	19.3095	1319.49	53.8571	1311.74	15.0893	1278.91	13.9	1272.46	17.175	1299.01	14.5833	1249.85	16.7857	1215.17	17.9	1265.95	13.1429	1262.4	13.7292	1280.3	11.7375
1361.44	12.8541	1328.15	19.9195	1300.8	14	1307.02	15.9	1291.88	13.6296	1288.06	18.3068	1297.32	17.5	1307.36	16.881	1321.43	58.2589	1313.69	17	1280.86	11.3	1274.42	14.375	1300.96	14.1667	1251.81	13.3571	1217.14	20.5	1267.91	14.5714	1264.36	14.0625	1282.26	14.2625
1363.38	13.1337	1330.09	18.7816	1302.75	16.0625	1308.97	16.575	1293.84	15.4352	1290.02	15.9659	1299.27	16.3333	1309.31	19.3571	1323.38	56.0982	1315.63	16.5446	1282.82	10.5	1276.38	12.9	1302.91	15.5833	1253.78	11.9286	1219.11	19.7	1269.87	16.2321	1266.32	13.75	1284.21	14.2875
1365.31	12.9271	1332.04	19.7414	1304.71	13.3125	1310.92	15.475	1295.79	12.7593	1291.97	16.2159	1301.22	16.5238	1311.26	17.2857	1325.33	54.1071	1317.58	15.8929	1284.78	12.425	1278.34	12.2	1304.86	19.5833	1255.74	14.2857	1221.09	19.3375	1271.83	13.6429	1268.28	15.1042	1286.17	11.2625
1367.25	13.9301	1333.98	22.7816	1306.66	17.9375	1312.87	14.7	1297.75	12.3704	1293.93	16.3523	1303.18	18	1313.21	19.8333	1327.28	55.2946	1319.53	16.2768	1286.73	13.3	1280.29	12.725	1306.82	15.3333	1257.7	15.2143	1223.06	17.55	1273.79	15.8929	1270.24	13.3125	1288.13	11.775
1369.19	12.9757	1335.93	21.523	1308.61	14.5625	1314.82	16.25	1299.7	12.5648	1295.88	16.8068	1305.13	16.119	1315.16	17.1429	1329.22	55.5536	1321.48	18.5179	1288.69	12.375	1282.25	13.325	1308.77	15.8333	1259.67	12.9286	1225.03	19.775	1275.75	15.3393	1272.2	13.0833	1290.08	12.8625
1371.12	13.5015	1337.87	24.3103	1310.56	13.1875	1316.77	15.225	1301.65	13.3519	1297.83	15.4432	1307.08	17.0238	1317.11	18.9762	1331.17	55.4375	1323.43	18.0446	1290.64	12.15	1284.21	15.3	1310.72	16.0833	1261.63	14.4286	1227	17.8875	1277.71	15.5714	1274.16	12.7292	1292.04	13.4625
1373.06	12.9635	1339.81	23.1667	1312.51	22.1875	1318.72	15.05	1303.6	12.5926	1299.79	15.4318	1309.03	14.4048	1319.06	19.5952	1333.11	56.1339	1325.37	19.2411	1292.6	12.3	1286.16	11.6	1312.67	11.1667	1263.59	16.9286	1228.97	17.4875	1279.66	13.4464	1276.12	17.6042	1293.99	12.8375
1375	13.7964	1341.76	25.2069	1314.46	13.8125	1320.67	16.475	1305.56	14.213	1301.74	16.75	1310.98	17.0952	1321	19.2619	1335.06	56.7768	1327.32	20.2768	1294.55	14.675	1288.12	16.2	1314.62	12.0833	1265.55	8.78571	1230.94	15.425	1281.62	14.1786	1278.08	14.125	1295.94	14.4625
1376.93	12.6809	1343.7	23.4885	1316.41	16.3125	1322.62	16.525	1307.51	12.9352	1303.69	16.1705	1312.93	16.119	1322.95	18.2143	1337	55.6161	1329.27	23.3571	1296.51	12.125	1290.07	9.3	1316.57	16.5833	1267.51	15	1232.91	18.1625	1283.58	12.7321	1280.04	16.0417	1297.9	13.825
1378.86	14.2462	1345.64	21.6322	1318.36	15.125	1324.56	15.75	1309.46	11.7407	1305.64	17.0341	1314.88	17.4524	1324.9	19.4286	1338.94	59.3661	1331.21	24.3929	1298.46	14.525	1292.03	10.9	1318.51	14.9167	1269.47	13.3571	1234.87	17.8375	1285.54	11.8929	1281.99	13.6042	1299.85	11.7875
1380.8	12.9027	1347.58	21.4713	1320.3	16.8125	1326.51	17.275	1311.41	11.0556	1307.6	17.4659	1316.83	16.9524	1326.85	19.8333	1340.89	60.4196	1333.16	29.0268	1300.41	14.325	1293.98	15.475	1320.46	11.3333	1271.43	7.57143	1236.84	19.45	1287.49	13.0714	1283.95	15.3542	1301.8	13.825
1382.73	13.7325	1349.53	23.2069	1322.25	15.5	1328.46	16.4	1313.36	12.787	1309.55	14.4773	1318.78	15.4286	1328.79	19.5	1342.83	59.9375	1335.1	34.6518	1302.37	11.9	1295.94	14.375	1322.41	14.75	1273.39	11.1429	1238.81	17.4875	1289.45	15.3036	1285.91	15.2292	1303.75	13.5875
1384.67	13.8723	1351.47	20.8046	1324.2	17.9375	1330.4	20.175	1315.31	14.1296	1311.5	14.1932	1320.73	17.5	1330.74	25.3571	1344.77	58.2679	1337.05	39.9018	1304.32	14.525	1297.89	13.6	1324.36	12.6667	1275.35	15.2857	1240.78	16.6	1291.4	13.0179	1287.86	14.7292	1305.71	12.125
1386.6	14.4985	1353.41	21.8678	1326.15	19.3125	1332.35	20.725	1317.26	12.5093	1313.45	15.2386	1322.67	15.5714	1332.68	26.2857	1346.72	61.3929	1338.99	45.5	1306.27	12.9	1299.84	11.75	1326.3	14	1277.31	7.78571	1242.74	14.8	1293.36	13.6964	1289.82	12.6667	1307.66	10.9875
1388.53	13.0486	1355.35	19.0632	1328.09	13.8125	1334.29	19.775	1319.2	10.7222	1315.4	14.7841	1324.62	17.381	1334.63	28.1667	1348.66	58.1875	1340.93	47.8571	1308.22	15.2	1301.8	10.725	1328.25	15.8333	1279.27	10.7857	1244.71	16.5875	1295.31	12.8571	1291.77	13.875	1309.61	14.825
1390.46	13.6322	1357.29	20.7989	1330.04	15.75	1336.24	22.375	1321.15	14.4815	1317.34	14.9886	1326.57	16.0476	1336.57	31.5952	1350.6	57.0446	1342.88	49.9464	1310.17	12.45	1303.75	12.9	1330.2	15.25	1281.22	15.5714	1246.67	16.5375	1297.26	13.5893	1293.73	11.8542	1311.56	11.725
1392.39	14.3921	1359.23	20.8678	1331.98	18.3125	1338.18	22.625	1323.1	15.0648	1319.29	16.6591	1328.51	17.5476	1338.52	31.9048	1352.54	54.8125	1344.82	47.5625	1312.12	11.775	1305.7	11.9	1332.14	16.0833	1283.18	17.5	1248.64	14.5125	1299.22	13.8571	1295.68	15.2917	1313.51	11.25
1394.32	13.8024	1361.16	19.0862	1333.93	18.125	1340.13	24.275	1325.05	11.7593	1321.24	16.9773	1330.46	18.6667	1340.46	35.3571	1354.48	58.4018	1346.76	41.8125	1314.07	15.425	1307.65	13.6	1334.09	11.9167	1285.14	9.85714	1250.6	17.375	1301.17	15.7143	1297.63	11.5417	1315.46	13.65
1396.25	12.7964	1363.1	18.8621	1335.87	22.375	1342.07	23.7	1326.99	13.1204	1323.19	17.2045	1332.4	16.7619	1342.4	36.5714	1356.42	55.4554	1348.7	38.9286	1316.02	13.95	1309.6	13.625	1336.03	17.25	1287.09	10.8571	1252.57	17.1	1303.12	11.9286	1299.59	13.7917	1317.41	13.75
1398.18	13.3313	1365.04	20.6437	1337.82	18.875	1344.01	22.025	1328.94	14.3981	1325.14	17.1932	1334.35	16.4286	1344.34	34.2143	1358.36	56.1161	1350.64	35.0179	1317.97	14.475	1311.55	10.275	1337.97	18.1667	1289.05	12.7143	1254.53	17.25	1305.07	13.2143	1301.54	12.7917	1319.35	10.6375
1400.11	12.9362	1366.98	19.4368	1339.76	18.5	1345.95	22	1330.89	14.5463	1327.08	18.6477	1336.29	16.6429	1346.29	33.3571	1360.3	55.1071	1352.58	32.9286	1319.92	13.075	1313.5	11.45	1339.92	15.6667	1291	10.2143	1256.5	16.3	1307.02	12.125	1303.49	13.6458	1321.3	12.075
1402.04	13.3556	1368.91	19.0977	1341.7	21.8125	1347.89	24.075	1332.83	15.537	1329.03	17.2386	1338.24	19.2143	1348.23	30.1667	1362.23	57.4196	1354.52	28.75	1321.86	11.15	1315.45	13.65	1341.86	14.1667	1292.96	7	1258.46	15.75	1308.98	12.6071	1305.44	13.9583	1323.25	13.8125
1403.97	12.4043	1370.85	18.0115	1343.65	19.5625	1349.84	22.3	1334.78	16.1574	1330.97	17.3636	1340.18	18.1429	1350.17	31.0476	1364.17	54.6964	1356.46	26.7679	1323.81	13.4	1317.4	11.2	1343.8	16.75	1294.91	10.2857	1260.42	16.4875	1310.93	13.7143	1307.4	12.6042	1325.2	12.55
1405.9	12.9422	1372.79	20.2586	1345.59	22.3125	1351.78	19.975	1336.72	13.4259	1332.92	20.6818	1342.12	20.7381	1352.11	29.2143	1366.11	55.4732	1358.4	22.5268	1325.76	14.2	1319.35	14.275	1345.75	14.75	1296.87	10.9286	1262.38	14.3875	1312.88	13.4286	1309.35	14.4792	1327.14	11.3
1407.83	12.6261	1374.72	19.408	1347.53	15.875	1353.72	19.875	1338.66	13.8241	1334.86	23.7955	1344.07	19.8571	1354.05	27.2381	1368.05	54.0536	1360.34	23.6875	1327.71	14.475	1321.3	12.175	1347.69	16.0833	1298.82	10.7143	1264.34	14.8375	1314.83	11.0714	1311.3	14.5	1329.09	14.6
1409.75	13.3343	1376.66	19.7759	1349.47	17.4375	1355.66	19.775	1340.61	15.0556	1336.81	21.9091	1346.01	18.2619	1355.99	24.8333	1369.98	55.1875	1362.28	21.25	1329.65	14.1	1323.24	13.2	1349.63	15.9167	1300.77	11.4286	1266.31	15.325	1316.77	11.9286	1313.25	11.8125	1331.04	17.1625
1411.68	12.5684	1378.59	20.7184	1351.41	24	1357.6	20.1	1342.55	15.1204	1338.75	27.2955	1347.95	18.1429	1357.93	22.1905	1371.92	54.0179	1364.22	19.3393	1331.6	15.025	1325.19	13.325	1351.57	17.0833	1302.72	12.2857	1268.27	16.0875	1318.72	11.875	1315.2	15.125	1332.98	11.95
1413.61	14.0821	1380.52	20.7529	1353.35	23.5	1359.54	20.775	1344.49	15.6111	1340.7	26.2727	1349.89	19.119	1359.87	23.5714	1373.85	54.9375	1366.15	18.0089	1333.54	17.1	1327.14	15.725	1353.51	15.25	1304.68	16.7857	1270.23	13.8375	1320.67	14.3929	1317.15	11.7083	1334.93	13.575
1415.53	12.9392	1382.46	20.0805	1355.29	17.75	1361.47	17.175	1346.44	15.0648	1342.64	28.1364	1351.83	17.4524	1361.81	24.1667	1375.79	54.8482	1368.09	18.0089	1335.49	15	1329.08	14.8	1355.45	19.9167	1306.63	11	1272.19	15.1375	1322.62	12.3036	1319.09	14.3542	1336.87	17.7875
1417.46	13.0699	1384.39	20.3563	1357.23	18.3125	1363.41	17.65	1348.38	15.9815	1344.58	27.0227	1353.77	17.9762	1363.74	20.9524	1377.72	56.4911	1370.03	17.2232	1337.43	15.725	1331.03	17.1	1357.39	16.4167	1308.58	10.2143	1274.14	15.4125	1324.57	14.5536	1321.04	12.9583	1338.81	15.7875
1419.38	12.8754	1386.32	18.4253	1359.17	19.5625	1365.35	18.15	1350.32	14.25	1346.52	27.1477	1355.71	15.2857	1365.68	20.8095	1379.66	55.8929	1371.96	16.1786	1339.37	16.45	1332.97	16.05	1359.33	15.5	1310.53	9.14286	1276.1	13.15	1326.51	15.0714	1322.99	15.3125	1340.76	15.9375
1421.31	13.8085	1388.26	20.3448	1361.11	16.75	1367.29	18.35	1352.26	15.1944	1348.46	24.6818	1357.65	15.9524	1367.62	21.5	1381.59	55.3036	1373.9	17.125	1341.32	17.575	1334.92	19.775	1361.27	16.1667	1312.48	12.3571	1278.06	14.6	1328.46	12.2857	1324.94	13.3125	1342.7	16.475
1423.23	12.7416	1390.19	21.0805	1363.05	19.9375	1369.22	18.6	1354.2	15.3519	1350.41	21.7159	1359.59	16.0952	1369.55	21.9048	1383.52	55.8125	1375.83	18.4107	1343.26	17.175	1336.86	19.175	1363.21	15.1667	1314.43	12.5714	1280.02	15.5375	1330.4	12.5	1326.88	14.7083	1344.64	17.4125
1425.15	13.0578	1392.12	18.8333	1364.99	21.125	1371.16	17.625	1356.14	15.2407	1352.35	23.9545	1361.53	16.1667	1371.49	20.2619	1385.46	56.1518	1377.77	17.7768	1345.2	17.375	1338.81	21.725	1365.14	18.25	1316.38	8.92857	1281.98	15.9125	1332.35	13.6429	1328.83	13.9792	1346.58	14.6625
1427.08	13.2371	1394.05	19.2644	1366.92	18.0625	1373.1	17.375	1358.08	13.7593	1354.29	19.9886	1363.47	17.5714	1373.43	20.2143	1387.39	58.2232	1379.7	17.6339	1347.14	20.05	1340.75	21.175	1367.08	16.8333	1318.33	8.71429	1283.93	13.7875	1334.29	14.6786	1330.77	14.875	1348.53	15.725
1429	14.5198	1395.98	18.3678	1368.86	15	1375.03	16.225	1360.02	12.4907	1356.23	18.9205	1365.4	16.4048	1375.36	22.5952	1389.32	56.6518	1381.64	16.7143	1349.09	17.15	1342.69	20.825	1369.02	20.1667	1320.27	10.4286	1285.89	14.1	1336.24	16.4286	1332.72	13.8125	1350.47	16.625
1430.92	13.3617	1397.91	20.069	1370.8	17.375	1376.97	18.4	1361.96	13.1019	1358.17	20.5227	1367.34	15.7381	1377.3	21.7143	1391.25	54.4821	1383.57	17.4464	1351.03	13.525	1344.64	19.7	1370.95	17	1322.22	14.3571	1287.85	13.6375	1338.18	16.0893	1334.66	18.625	1352.41	15.2625
1432.84	13.4802	1399.84	20.0977	1372.73	14.0625	1378.9	16.075	1363.89	14.8333	1360.1	17.1136	1369.28	19.5952	1379.23	21.9524	1393.18	58.3571	1385.5	16.1786	1352.97	15.45	1346.58	18.95	1372.89	17.1667	1324.17	14.7857	1289.8	13.925	1340.13	18.6964	1336.61	17.75	1354.35	12.275
1434.77	12.8906	1401.77	18.2529	1374.67	16.8125	1380.83	16.45	1365.83	13.6111	1362.04	19.5114	1371.21	16.7381	1381.16	21.8571	1395.12	56.7857	1387.43	17.2946	1354.91	15.9	1348.52	19.625	1374.82	17.3333	1326.12	11.2143	1291.76	14.8	1342.07	15.9464	1338.55	18.1458	1356.29	16.1125
1436.69	13.8815	1403.7	17.8276	1376.6	15.5625	1382.77	17.15	1367.77	13.8148	1363.98	17	1373.15	17.2619	1383.1	20.9048	1397.05	56.5714	1389.37	16.8304	1356.85	16	1350.46	21.4	1376.76	17.75	1328.06	13.2143	1293.71	15.3625	1344.01	17.3929	1340.5	18.75	1358.23	13.6875
1438.61	13.1854	1405.63	19.8736	1378.54	21.5625	1384.7	16.225	1369.7	12.7315	1365.92	17.0455	1375.08	16.0714	1385.03	20.8571	1398.97	56.8839	1391.3	16.3393	1358.79	14.25	1352.4	17.375	1378.69	19.4167	1330.01	10.9286	1295.66	15.1125	1345.95	15.8929	1342.44	16.7083	1360.17	12.7625
1440.53	13.8997	1407.55	18.0747	1380.47	17.25	1386.63	16.625	1371.64	12.6481	1367.85	15.2045	1377.02	16.0952	1386.96	19.9286	1400.9	57.4018	1393.23	16	1360.72	14.525	1354.34	16.05	1380.63	13.4167	1331.95	9.71429	1297.62	15.35	1347.9	16.625	1344.38	18.2708	1362.1	13.2875
1442.45	13.1094	1409.48	19.2931	1382.41	16.25	1388.57	16.825	1373.58	14.6574	1369.79	16.75	1378.95	16.8571	1388.89	19	1402.83	56.3036	1395.16	14.7589	1362.66	13.975	1356.28	17.025	1382.56	18.5	1333.9	10.5	1299.57	17.15	1349.84	14.4643	1346.32	16.125	1364.04	13.6875
1444.37	14.5106	1411.41	18.8678	1384.34	18	1390.5	15.4	1375.51	14.7315	1371.73	18	1380.89	16.6667	1390.83	21.881	1404.76	54.3661	1397.09	16.2054	1364.6	14.825	1358.22	15.75	1384.49	14.6667	1335.84	10.5	1301.52	14.95	1351.78	17.1607	1348.27	15.3125	1365.98	10.0375
1446.28	14.1003	1413.33	17.3851	1386.27	18.5	1392.43	14.575	1377.45	12.6389	1373.66	17.5341	1382.82	18.4048	1392.76	18.8333	1406.69	55.8214	1399.02	16.1071	1366.54	14.375	1360.16	14.3	1386.43	17.5	1337.79	10.7143	1303.48	13.8	1353.72	12.5179	1350.21	14.6042	1367.92	12.8375
1448.2	14.1337	1415.26	19.023	1388.2	15.5	1394.36	15	1379.38	13.8704	1375.6	16.9545	1384.75	20.0952	1394.69	19.381	1408.62	56.5179	1400.95	15.25	1368.47	13.325	1362.1	14.025	1388.36	17	1339.73	13.2143	1305.43	13.7375	1355.66	13.1071	1352.15	14.4583	1369.85	14.175
1450.12	13.3799	1417.18	16.2759	1390.14	18	1396.29	16.2	1381.31	12.9907	1377.53	17.6932	1386.69	19.2619	1396.62	19.2857	1410.54	53.6696	1402.88	15.7054	1370.41	14.4	1364.03	13.1	1390.29	18.4167	1341.67	13.1429	1307.38	14.175	1357.6	15.0179	1354.09	15.8333	1371.79	12.8
1452.04	13.8116	1419.11	18.4195	1392.07	22.5625	1398.22	13.75	1383.25	13.6389	1379.47	17.5909	1388.62	18.2857	1398.55	19.4048	1412.47	54.5804	1404.8	13.7857	1372.35	12.275	1365.97	17.4	1392.22	15.3333	1343.62	15.6429	1309.33	13.1625	1359.54	12.7857	1356.03	13.6042	1373.72	11.5
1453.95	13.7477	1421.03	18.5057	1394	17.3125	1400.15	13.725	1385.18	13.5463	1381.4	17.1818	1390.55	17.8095	1400.48	19.9048	1414.4	55.1696	1406.73	15.0536	1374.28	13.875	1367.91	13.825	1394.15	15.1667	1345.56	15.9286	1311.28	13.0625	1361.47	12.4107	1357.97	13.7917	1375.66	15.025
1455.87	13.6991	1422.96	18.0287	1395.93	15.1875	1402.08	15.275	1387.11	13.5556	1383.33	13.8409	1392.48	19.0238	1402.41	18.381	1416.32	53.5446	1408.66	15.5714	1376.22	13.725	1369.84	11.525	1396.08	19.4167	1347.5	13.6429	1313.23	14.3	1363.41	11.0357	1359.91	13.2917	1377.59	13.9375
1457.79	14.4195	1424.88	17.2184	1397.86	14.875	1404.01	14.5	1389.05	13.1667	1385.27	16.9659	1394.41	17.9048	1404.33	15.5476	1418.25	55.6607	1410.59	15.2232	1378.15	14.2	1371.78	12.725	1398.01	15.9167	1349.44	14.7857	1315.18	14.8625	1365.35	12.2679	1361.84	13.625	1379.53	11.275
1459.7	13.6109	1426.8	18.8506	1399.79	16.25	1405.93	10.725	1390.98	13.2037	1387.2	15.5455	1396.34	18.2143	1406.26	18.9286	1420.17	57.9196	1412.51	15.0714	1380.09	13.875	1373.72	13.975	1399.94	13.8333	1351.38	13.7143	1317.13	15.3625	1367.29	14.75	1363.78	13.4375	1381.46	11.6625
1461.62	13.9544	1428.73	18.7011	1401.72	12.0625	1407.86	14.05	1392.91	13.5833	1389.13	15.4318	1398.27	17.6667	1408.19	17.6667	1422.1	56.3661	1414.44	14.8839	1382.02	12.05	1375.65	13.075	1401.87	16.5833	1353.32	16.1429	1319.08	15.4875	1369.22	13.2857	1365.72	13.3542	1383.4	13.775
1463.53	13.9027	1430.65	19.1149	1403.65	16.375	1409.79	14.225	1394.84	15.7407	1391.06	16.0227	1400.2	15.5714	1410.12	17.9762	1424.02	56.8036	1416.36	14.6518	1383.95	11.975	1377.59	10.35	1403.8	14.9167	1355.26	12	1321.02	14.9125	1371.16	13.0357	1367.66	15.4792	1385.33	12.7
1465.45	13.2371	1432.57	18.0747	1405.57	16.75	1411.72	15.225	1396.77	13.0833	1392.99	15.4545	1402.13	15.9048	1412.04	17.119	1425.94	56.0446	1418.29	15.6875	1385.89	13.175	1379.52	9.975	1405.73	11.9167	1357.2	8.5	1322.97	13.975	1373.1	12.9464	1369.59	14.6042	1387.26	11.3375
1467.36	14.1854	1434.49	18.3736	1407.5	14.25	1413.64	12.725	1398.7	14.1574	1394.92	15.7727	1404.06	17.381	1413.97	18.381	1427.86	56.6875	1420.21	14.2321	1387.82	13.4	1381.45	14.55	1407.66	13.75	1359.14	11.6429	1324.92	13.2125	1375.03	14.9821	1371.53	12.7917	1389.19	13.8625
1469.27	13.6626	1436.41	19.0057	1409.43	20.0625	1415.57	16.75	1400.63	15.2037	1396.86	14.0682	1405.99	15.5952	1415.89	16.5238	1429.79	56.7232	1422.14	15.5982	1389.75	11.55	1383.39	11.475	1409.58	16	1361.08	13.3571	1326.87	14.9	1376.97	10.8929	1373.47	14.1458	1391.12	13.0625
1471.19	13.4073	1438.33	19.408	1411.36	15	1417.49	15.925	1402.56	13.6759	1398.78	13.9318	1407.91	16.3571	1417.82	17.4524	1431.71	56.0625	1424.06	16.0982	1391.68	13.625	1385.32	12.1	1411.51	15.8333	1363.02	12.1429	1328.81	15.225	1378.9	13.3393	1375.4	13.6667	1393.05	10.675
1473.1	13.1793	1440.25	19.7241	1413.28	16.75	1419.42	16.125	1404.49	13.5833	1400.71	15.0909	1409.84	16.0238	1419.74	19.3571	1433.63	56.1696	1425.99	14.3839	1393.61	13.9	1387.25	11.075	1413.44	17.6667	1364.95	8.92857	1330.76	15.6375	1380.83	13.8036	1377.34	13.8333	1394.99	11.75
1475.01	12.9453	1442.17	19.0862	1415.21	13.8125	1421.34	14.7	1406.41	13.7407	1402.64	14.1705	1411.77	16.3571	1421.67	20.0476	1435.55	55.4643	1427.91	15.5268	1395.54	13.05	1389.18	10.4	1415.36	15	1366.89	14.8571	1332.7	16.625	1382.77	13.1071	1379.27	14.1458	1396.92	13.9625
1476.92	12.9362	1444.09	20.5115	1417.13	17.375	1423.27	15.3	1408.34	13.2037	1404.57	14.0341	1413.69	15.5238	1423.59	17.3333	1437.47	55.8214	1429.83	15.5982	1397.47	12.775	1391.12	13.1	1417.29	11.8333	1368.83	12.4286	1334.65	15.8875	1384.7	13.7321	1381.2	14.25	1398.85	13.5
1478.83	12.6413	1446.01	18.9885	1419.06	15.9375	1425.19	15.425	1410.27	13.8519	1406.5	15.1136	1415.62	16.7143	1425.52	22.7619	1439.39	58.1786	1431.75	14.1696	1399.4	14.15	1393.05	11.1	1419.21	15.8333	1370.77	12.7143	1336.59	16.475	1386.63	12.625	1383.14	15	1400.77	10.9875
1480.74	12.3283	1447.93	18.1954	1420.98	14.9375	1427.11	14.725	1412.19	11.4352	1408.43	14.25	1417.54	16.5952	1427.44	18	1441.31	58.1339	1433.67	16.6696	1401.33	11.925	1394.98	12.475	1421.14	15	1372.7	12.7857	1338.54	18.65	1388.57	14.9464	1385.07	13.75	1402.7	14.7375
1482.65	12.7994	1449.85	20.6092	1422.91	17.375	1429.03	15.475	1414.12	13.6481	1410.35	15.8409	1419.47	16.4762	1429.36	18.1667	1443.23	56.4464	1435.6	16.1161	1403.26	12.05	1396.91	13.175	1423.06	14.9167	1374.64	13.9286	1340.48	18.225	1390.5	13.9643	1387	14.6042	1404.63	12.125
1484.56	11.9088	1451.76	18.9368	1424.83	16.125	1430.96	16.225	1416.05	13.3426	1412.28	14.75	1421.39	17.5	1431.28	17.619	1445.15	56.6339	1437.52	16.4732	1405.19	11.775	1398.84	13.325	1424.98	15.3333	1376.57	11.6429	1342.42	16.6625	1392.43	12.9643	1388.93	14.0833	1406.56	11.0125
1486.47	12.5319	1453.68	18.7529	1426.75	16.25	1432.88	16.7	1417.97	13.1204	1414.21	14.3182	1423.32	17.0952	1433.2	18.9286	1447.07	56.8036	1439.44	16.9464	1407.12	11.625	1400.77	11.975	1426.91	15.0833	1378.51	11.0714	1344.36	14.525	1394.36	14.8214	1390.87	14.3125	1408.49	12.3375
1488.38	12.1672	1455.6	18.6782	1428.68	16.8125	1434.8	17.475	1419.9	14.4074	1416.13	14.0455	1425.24	15.6667	1435.13	19.7619	1448.99	58.0179	1441.36	17.5089	1409.04	10.825	1402.7	11.05	1428.83	17.25	1380.44	12.0714	1346.31	18.9625	1396.29	14.6607	1392.8	14.3125	1410.41	14.25
1490.29	11.4772	1457.51	19.3678	1430.6	15.1875	1436.72	14.65	1421.82	12.5741	1418.06	15.4205	1427.16	14.5714	1437.05	20.5476	1450.9	58.6429	1443.27	16.1607	1410.97	13.025	1404.62	11	1430.75	10.6667	1382.37	12.7857	1348.25	16.075	1398.22	13.3929	1394.73	12.9167	1412.34	10.15
1492.2	11.1459	1459.43	19.0632	1432.52	17.875	1438.64	14.575	1423.74	12.5	1419.98	16.25	1429.09	16.4048	1438.97	20.8333	1452.82	58.1964	1445.19	17.1161	1412.9	13.575	1406.55	12.525	1432.67	15.5	1384.31	11.4286	1350.19	17.3125	1400.15	13.3393	1396.66	14.6042	1414.27	11.8875
1494.1	12.7903	1461.34	20.3448	1434.44	15	1440.56	17.65	1425.67	14.9167	1421.91	15.2841	1431.01	15.5714	1440.89	19.2381	1454.74	60.625	1447.11	17.7589	1414.82	13.225	1408.48	12	1434.6	12.25	1386.24	11.1429	1352.13	16.0875	1402.08	15.0893	1398.59	13.5417	1416.19	13.4125
1496.01	12.4742	1463.26	16.8908	1436.36	20.5	1442.48	16.125	1427.59	13.3796	1423.83	16.6818	1432.93	13.619	1442.81	19.4286	1456.65	56.1875	1449.03	16.2411	1416.75	11.95	1410.41	12.125	1436.52	16.5	1388.17	12	1354.07	15.8625	1404.01	11.8393	1400.52	13.5625	1418.12	10.9625
1497.92	12.2462	1465.17	18.7701	1438.28	20.625	1444.4	14.7	1429.51	11.6574	1425.75	16.0227	1434.85	16.119	1444.72	18.4286	1458.57	58.7232	1450.95	16.5625	1418.67	14.35	1412.33	13.125	1438.44	17.3333	1390.1	15.6429	1356.01	14.075	1405.93	14.8393	1402.45	14.5	1420.04	10
1499.82	11.924	1467.09	17.8218	1440.2	14.375	1446.32	18.075	1431.44	13.0926	1427.68	16.4545	1436.77	16.2857	1446.64	20.2143	1460.48	57.5179	1452.86	17.8304	1420.6	12.275	1414.26	10.725	1440.36	15.9167	1392.03	16.4286	1357.95	15.375	1407.86	12.9821	1404.37	12.75	1421.97	12.175
1501.73	12.1429	1469	18.2816	1442.12	16.375	1448.24	16.15	1433.36	14.0278	1429.6	15.125	1438.69	17.9762	1448.56	17.8333	1462.4	56.7321	1454.78	16.1964	1422.52	13.95	1416.18	11.225	1442.28	17.5833	1393.96	13.2143	1359.89	13.875	1409.79	13.375	1406.3	12.3958	1423.89	12.5625
1503.63	11.7447	1470.91	18.6322	1444.04	15.375	1450.15	14.95	1435.28	14.2222	1431.52	16.4432	1440.61	14.7619	1450.48	21.619	1464.31	57.0714	1456.7	25.0625	1424.45	13.2	1418.11	11.875	1444.19	15.5833	1395.9	12.6429	1361.83	13.5625	1411.72	12.375	1408.23	14.2708	1425.81	11.05
1505.54	11.5653	1472.83	17.7874	1445.96	17.9375	1452.07	15.475	1437.2	12.5185	1433.44	14.5114	1442.53	17.8571	1452.4	22.2381	1466.23	57.0625	1458.61	120.402	1426.37	16.2	1420.03	12.425	1446.11	14.5833	1397.83	13.5714	1363.76	13.575	1413.64	13.1429	1410.16	12.6667	1427.74	10.3625
1507.44	11.7143	1474.74	17.0402	1447.88	18.5625	1453.99	15.875	1439.12	14.1019	1435.36	15.3409	1444.45	17.4048	1454.31	22.7381	1468.14	55.0179	1460.53	18.8304	1428.29	13.25	1421.96	11.225	1448.03	16	1399.75	15.2857	1365.7	15.4875	1415.57	11.5714	1412.08	11.2708	1429.66	15.05
1509.35	12.6322	1476.65	18.0747	1449.8	14.9375	1455.9	18.525	1441.04	14.3889	1437.28	14.9773	1446.37	17.119	1456.23	19.119	1470.05	56.2768	1462.44	15.4643	1430.21	13.15	1423.88	9.325	1449.95	15.8333	1401.68	14.3571	1367.64	16.25	1417.49	13.3393	1414.01	10.0208	1431.58	12.5375
1511.25	11.7325	1478.56	17	1451.71	18.6875	1457.82	14.25	1442.96	13.2222	1439.2	16.0795	1448.29	18.5714	1458.14	18.1667	1471.97	56.1964	1464.36	16.375	1432.14	14.45	1425.81	9.725	1451.87	16	1403.61	12.2143	1369.58	14.7125	1419.42	13.6607	1415.94	12.6875	1433.5	11.9875
1513.15	11.7264	1480.47	17.2989	1453.63	15.5	1459.74	13.45	1444.88	15.0926	1441.12	16.4091	1450.21	20.3333	1460.06	19.4048	1473.88	56.9464	1466.27	15.9911	1434.06	14.775	1427.73	14.725	1453.78	14.0833	1405.54	8.92857	1371.51	13.4	1421.34	15.2321	1417.86	13.9583	1435.42	12.4875
1515.06	11.1003	1482.38	16.1954	1455.55	20.1875	1461.65	14.975	1446.8	15.037	1443.04	15.8636	1452.12	17.6429	1461.97	20.0714	1475.79	54.2411	1468.18	14.5268	1435.98	13.325	1429.65	12.4	1455.7	16.25	1407.47	12.4286	1373.45	15.5875	1423.27	12.6429	1419.79	13.7708	1437.34	11.7125
1516.96	11.7477	1484.29	17.3908	1457.46	16.6875	1463.57	14.425	1448.71	14.75	1444.96	16.7273	1454.04	18.381	1463.89	19.9286	1477.7	55.0268	1470.1	16	1437.9	14.325	1431.57	13.525	1457.62	19.75	1409.4	13	1375.38	15.0125	1425.19	14.1786	1421.71	10.4167	1439.26	12.225
1518.86	11.2857	1486.2	18.1494	1459.38	18.1875	1465.48	16	1450.63	14.6019	1446.88	17.3523	1455.96	14.5476	1465.8	17.2857	1479.61	54.0268	1472.01	15.1071	1439.82	15.625	1433.49	10.375	1459.53	16.6667	1411.32	8.85714	1377.32	15.15	1427.11	14.2321	1423.63	14.875	1441.18	13.825
1520.76	11.5106	1488.11	16.8678	1461.29	15.8125	1467.39	13.125	1452.55	15.25	1448.8	16.6136	1457.87	17.5476	1467.72	18.2857	1481.52	52.0804	1473.92	15.4464	1441.74	13.2	1435.42	14.45	1461.45	15.8333	1413.25	14.7143	1379.25	13.8625	1429.03	13.75	1425.56	14.1667	1443.1	14.1625
1522.66	11.6201	1490.02	17.7241	1463.21	21.875	1469.31	15.275	1454.47	14.1481	1450.72	16.4091	1459.79	13.2857	1469.63	19.2857	1483.43	53.3661	1475.83	14.1518	1443.66	13.075	1437.34	12.15	1463.36	10.6667	1415.17	11.0714	1381.19	14.8875	1430.96	13.8571	1427.48	13.75	1445.02	12.7375
1524.56	12.1672	1491.92	17.6092	1465.12	16.125	1471.22	13.975	1456.38	15.3333	1452.63	14.3068	1461.7	19.7143	1471.54	20.9286	1485.34	55.1161	1477.74	14.1875	1445.58	13.225	1439.26	13.45	1465.28	15.1667	1417.1	17.5	1383.12	13.7	1432.88	13.0357	1429.4	13.8125	1446.94	12.7
1526.46	11.538	1493.83	14.8046	1467.04	11.4375	1473.13	12.55	1458.3	14.2222	1454.55	16.5341	1463.62	17.6667	1473.45	17.6905	1487.25	53.7679	1479.65	14.4911	1447.49	12.7	1441.18	11.2	1467.19	18.1667	1419.02	8.78571	1385.05	15.725	1434.8	12.9643	1431.32	11.75	1448.86	15.5375
1528.36	12.0638	1495.74	17.2759	1468.95	16.625	1475.04	14.225	1460.21	13.3333	1456.47	16.0341	1465.53	16.8095	1475.37	14.9524	1489.16	51.375	1481.56	14.1964	1449.41	12.9	1443.1	15.65	1469.1	18.5	1420.95	12.3571	1386.98	15.7125	1436.72	12.7321	1433.25	10.7083	1450.78	12.6125
1530.26	11.0213	1497.65	16.6494	1470.86	17.875	1476.95	12.95	1462.13	13	1458.38	16.8864	1467.44	15.9762	1477.28	17.119	1491.07	53.0893	1483.47	15.0536	1451.33	13.3	1445.01	10.125	1471.01	14.3333	1422.87	15	1388.92	13.75	1438.64	14.125	1435.17	13.5208	1452.69	12.4875
1532.16	12.7508	1499.55	16.8793	1472.77	15.625	1478.87	13.325	1464.04	14.7222	1460.3	15.4545	1469.36	17.1429	1479.19	17.4524	1492.97	54.7054	1485.38	13.1696	1453.25	13.25	1446.93	11.65	1472.93	15.4167	1424.8	12.5	1390.85	13.7	1440.56	15.3929	1437.09	12.5	1454.61	13.6625
1534.06	12.2006	1501.46	17.5345	1474.69	17.8125	1480.78	16.375	1465.96	13.0926	1462.21	16.1477	1471.27	14.9524	1481.1	15.8095	1494.88	54.625	1487.29	14.5804	1455.16	13.275	1448.85	12.675	1474.84	14.5833	1426.72	12.2143	1392.78	14.525	1442.48	12.3929	1439.01	13.625	1456.53	15.6
1535.95	12.3526	1503.36	17.3391	1476.6	18.6875	1482.69	14.6	1467.87	14.2315	1464.13	14.7273	1473.18	14.619	1483.01	17.6667	1496.79	52.3125	1489.2	13.6071	1457.08	13.9	1450.77	11.7	1476.75	15.1667	1428.64	11.0714	1394.71	14.6625	1444.4	14.5893	1440.93	12.9167	1458.44	13.3125
1537.85	12.155	1505.27	16.1034	1478.51	17.0625	1484.6	14.275	1469.78	11.9907	1466.04	14.2614	1475.09	15.9048	1484.92	17.7619	1498.69	53.6429	1491.11	12.3214	1458.99	12.075	1452.68	13.85	1478.66	18.25	1430.56	10.3571	1396.64	14.2625	1446.32	13.9107	1442.85	13.4375	1460.36	13.325
1539.75	12.4407	1507.17	17.2586	1480.42	16.4375	1486.5	13.175	1471.7	13.5093	1467.95	12.7614	1477	15.881	1486.83	15.4286	1500.6	53.8929	1493.02	14.5893	1460.91	12.85	1454.6	12.5	1480.57	18.3333	1432.49	11.7857	1398.57	15.7125	1448.24	14.6071	1444.77	14.1875	1462.27	14.5125
1541.64	12.3283	1509.07	15.8046	1482.33	15.625	1488.41	15.45	1473.61	13.6667	1469.87	16.2841	1478.92	17.3095	1488.73	15.8571	1502.51	51.2679	1494.92	13.5804	1462.82	12.75	1456.52	13.025	1482.48	15	1434.41	11.4286	1400.5	15.775	1450.15	14.3393	1446.68	13.1042	1464.19	12.3125
1543.54	12.8541	1510.98	16.9425	1484.24	18.125	1490.32	11.1	1475.52	11.8704	1471.78	13.7386	1480.83	16.2619	1490.64	15.3333	1504.41	51.0714	1496.83	12.5982	1464.74	13.6	1458.43	12.35	1484.39	13	1436.33	10.7857	1402.43	12.5625	1452.07	12.7679	1448.6	12.2917	1466.1	9.5125
1545.44	12.5076	1512.88	16.4598	1486.15	13	1492.23	14.65	1477.43	12.5	1473.69	15.5568	1482.74	13.0238	1492.55	16.6905	1506.32	54.5089	1498.74	13.0982	1466.65	12.1	1460.35	11.1	1486.3	10.75	1438.25	13.2143	1404.36	15	1453.99	13.9821	1450.52	15.3333	1468.01	13.9875
1547.33	14.0486	1514.78	17.454	1488.06	14.1875	1494.14	14.7	1479.34	12.7222	1475.6	15.8636	1484.65	16.619	1494.46	16.3095	1508.22	53.75	1500.64	12.8036	1468.57	10.25	1462.26	14.125	1488.21	15.4167	1440.17	8.42857	1406.28	15.55	1455.9	13.5179	1452.44	12.7292	1469.93	13.425
1549.22	13.8389	1516.69	17.7471	1489.97	17.0625	1496.04	13.25	1481.25	11.3519	1477.52	14.8182	1486.55	15.5	1496.36	17.1429	1510.12	51.3304	1502.55	12.0804	1470.48	11.375	1464.18	11.55	1490.12	17.75	1442.09	9.71429	1408.21	13.2125	1457.82	13.4286	1454.35	12.6875	1471.84	10.625
1551.12	14.8754	1518.59	15.7874	1491.87	13.6875	1497.95	12.7	1483.16	11.9722	1479.43	13.1591	1488.46	15.8095	1498.27	14.9524	1512.03	52.7946	1504.45	12.4732	1472.39	13.275	1466.09	12.55	1492.03	16	1444.01	8.28571	1410.14	15.7	1459.74	13.9286	1456.27	12.8333	1473.75	13.075
1553.01	16.7568	1520.49	16.7471	1493.78	20.0625	1499.86	12.075	1485.07	12.5185	1481.34	14.2159	1490.37	16.1429	1500.18	15.2143	1513.93	52.3571	1506.36	14.4286	1474.3	11.45	1468	12.95	1493.93	14.5833	1445.93	15.7143	1412.07	15.15	1461.65	11.9286	1458.19	15.7083	1475.66	12.5
1554.91	19.8815	1522.39	18.6207	1495.69	13.4375	1501.76	12.85	1486.98	11.7222	1483.25	14.5795	1492.28	15.1429	1502.08	16.8095	1515.83	52.25	1508.26	12.7768	1476.21	11.65	1469.92	9.45	1495.84	6.91667	1447.84	13.8571	1413.99	13.6	1463.56	12.9286	1460.1	15.7917	1477.57	10.6375
1556.8	23.0821	1524.29	16.046	1497.6	17.5	1503.67	12.925	1488.89	9.72222	1485.16	15.875	1494.19	12.381	1503.99	15.619	1517.73	51.7143	1510.17	12.8929	1478.13	12.075	1471.83	12.325	1497.75	15.75	1449.76	14.5714	1415.92	15.675	1465.48	13.9821	1462.02	14.0833	1479.48	10.6875
1558.69	25.6505	1526.19	18.4195	1499.5	15.1875	1505.57	14.05	1490.8	11.5185	1487.06	13.6136	1496.09	16.3095	1505.89	15.5714	1519.63	52.2946	1512.07	11.9732	1480.04	12.05	1473.74	13.625	1499.65	14.9167	1451.68	11.5714	1417.84	14.3625	1467.39	14.1429	1463.93	12.0208	1481.4	13.0125
1560.58	23.1672	1528.09	16.6322	1501.41	16.5	1507.48	13.925	1492.71	11.2222	1488.97	13.6023	1498	15	1507.8	15.5714	1521.54	51.7143	1513.97	13.6964	1481.95	11.65	1475.65	11.45	1501.56	13.1667	1453.6	15.2857	1419.77	14.625	1469.31	10.75	1465.85	13.8125	1483.31	11.8875
1562.47	21.4103	1529.99	17.2414	1503.31	17	1509.38	14.45	1494.61	12.6389	1490.88	14.0114	1499.91	16.381	1509.7	16.5952	1523.44	52.1875	1515.87	13.0714	1483.86	12.675	1477.57	12.55	1503.46	15.25	1455.51	10.7143	1421.69	13.6	1471.22	11.9107	1467.76	14.6667	1485.21	9.8375
1564.37	21.6018	1531.89	16.8161	1505.22	9.0625	1511.28	14.325	1496.52	13.1574	1492.79	14.0455	1501.81	13.381	1511.6	14.5476	1525.34	52.6429	1517.77	12.125	1485.77	12.775	1479.48	11.85	1505.37	11.5	1457.43	9.42857	1423.62	14.8875	1473.13	11.7321	1469.67	11.1667	1487.12	12.975
1566.26	25.5106	1533.78	16.7931	1507.12	13.625	1513.19	12.75	1498.43	12.6389	1494.7	13.5909	1503.72	12.3333	1513.51	17.4048	1527.24	53.1518	1519.68	12.6339	1487.67	11.85	1481.39	11.4	1507.27	17.4167	1459.34	11.7143	1425.54	15.6	1475.04	12.75	1471.58	12.3542	1489.03	10.9875
1568.15	28.2219	1535.68	17.8218	1509.03	18.3125	1515.09	13.875	1500.33	10.0185	1496.6	14.9205	1505.62	12.5238	1515.41	16.5	1529.13	51.4107	1521.58	13.8839	1489.58	11.475	1483.3	13.775	1509.18	15.0833	1461.26	9.07143	1427.46	15.5125	1476.95	10.7143	1473.5	12.4375	1490.94	10.675
1570.04	33.8085	1537.58	18.3793	1510.93	14.8125	1516.99	11.825	1502.24	11.6111	1498.51	13.7955	1507.53	15.9762	1517.31	18.5714	1531.03	55.6875	1523.48	13.5179	1491.49	12.925	1485.21	11.225	1511.08	16.3333	1463.17	12.0714	1429.39	15.275	1478.86	10.5357	1475.41	12.375	1492.85	10.025
1571.92	40.7508	1539.48	17.0057	1512.83	16.125	1518.89	14.15	1504.14	12.7778	1500.42	14.7614	1509.43	15.7857	1519.21	18.0952	1532.93	55	1525.38	12.0714	1493.4	11.475	1487.11	10.475	1512.98	11.0833	1465.09	8.28571	1431.31	14.9375	1480.78	13.5	1477.32	13.2083	1494.76	13.625
1573.81	51.8267	1541.37	18.0977	1514.73	16.4375	1520.79	12.375	1506.05	12.6204	1502.32	12.4318	1511.33	14.6429	1521.11	18.5238	1534.83	52.3839	1527.28	11.6518	1495.31	11.125	1489.02	13.65	1514.89	16.4167	1467	13.2857	1433.23	13.6375	1482.69	14.2857	1479.23	12.5	1496.66	10.225
1575.7	66.4286	1543.27	16.7701	1516.64	15.1875	1522.69	11.625	1507.95	10.0278	1504.23	14.2386	1513.24	10.0952	1523.01	18.3333	1536.73	53.3036	1529.18	13.2054	1497.21	10.425	1490.93	8.425	1516.79	15.75	1468.91	13.2857	1435.15	13.5	1484.59	13.7679	1481.14	13.625	1498.57	10.35
1577.59	89.1155	1545.16	19.2759	1518.54	14.75	1524.59	11.9	1509.85	12.2037	1506.13	12.2273	1515.14	13.3095	1524.91	18.5952	1538.62	53.5536	1531.07	13.3304	1499.12	12.05	1492.84	10.5	1518.69	15	1470.83	10.4286	1437.07	13.35	1486.5	11.8036	1483.05	14.3333	1500.47	12.275
1579.48	118.246	1547.06	18.2241	1520.44	13.3125	1526.49	12.975	1511.76	12.75	1508.03	13.1932	1517.04	15.0714	1526.81	16.0238	1540.52	55.5179	1532.97	13.3393	1501.02	9.65	1494.75	12.525	1520.59	15.75	1472.74	9.21429	1438.99	14.1125	1488.41	10.6607	1484.96	13.1042	1502.38	12.4
1581.36	158.742	1548.95	18.8276	1522.34	15.75	1528.39	12.05	1513.66	10.3519	1509.94	14.6477	1518.94	11.5238	1528.71	16.8095	1542.42	54.2946	1534.87	12.8214	1502.93	12	1496.65	12.15	1522.49	14.3333	1474.65	14.1429	1440.91	13.55	1490.32	11.6429	1486.87	10.7083	1504.28	9.3875
1583.25	203.872	1550.85	20.523	1524.24	13.875	1530.29	13.3	1515.56	12.3241	1511.84	14.7386	1520.84	14.3095	1530.61	15.3095	1544.31	53.8839	1536.77	14.2143	1504.83	9.5	1498.56	14.25	1524.39	13.0833	1476.56	8.85714	1442.83	13.7	1492.23	11.875	1488.78	12.2083	1506.19	10.375
1585.14	230.207	1552.74	22.3448	1526.14	16.4375	1532.19	10.75	1517.47	12.5926	1513.74	13.4545	1522.74	16.381	1532.51	18.619	1546.21	56.1429	1538.67	14.6696	1506.74	12.925	1500.46	12.3	1526.29	15.5	1478.47	10.3571	1444.75	14.2	1494.14	11.5536	1490.69	11.3125	1508.09	11.7
1587.02	224.264	1554.63	23.8391	1528.04	16.4375	1534.09	13.625	1519.37	10.787	1515.65	12.6477	1524.64	13.0476	1534.41	17	1548.1	54.2857	1540.56	14.8036	1508.64	10.525	1502.37	10.475	1528.19	10.8333	1480.38	11.4286	1446.67	13.975	1496.04	11.1964	1492.59	11.4583	1510	11.2875
1588.91	183.307	1556.53	28.6839	1529.94	17.375	1535.99	14.725	1521.27	12.6481	1517.55	12.7386	1526.54	11.2619	1536.3	17.8095	1550	55.3839	1542.46	12.6161	1510.55	13.8	1504.28	11.6	1530.09	17.9167	1482.29	9.5	1448.59	15.3125	1497.95	12.1429	1494.5	12.9583	1511.9	9.1
1590.79	130.608	1558.42	31.6092	1531.84	15.875	1537.88	14.75	1523.17	11.0278	1519.45	13.3523	1528.44	13.2381	1538.2	19.5476	1551.89	57.0714	1544.35	14.5893	1512.45	11.575	1506.18	11.9	1531.99	13	1484.2	6.07143	1450.5	16.025	1499.86	13.4286	1496.41	11.3542	1513.8	12.525
1592.68	89.4802	1560.31	32.2759	1533.74	13.875	1539.78	12.925	1525.07	12.8148	1521.35	14.2386	1530.34	13.619	1540.1	17.881	1553.78	60.25	1546.25	13.7143	1514.35	11.525	1508.08	12.375	1533.89	16.6667	1486.11	13.2857	1452.42	14.9125	1501.76	11.5179	1498.31	12.5417	1515.7	8.475
1594.56	62.459	1562.2	27.1034	1535.63	17.3125	1541.68	15.25	1526.97	12.1204	1523.25	15.6477	1532.24	13.0714	1541.99	17.3571	1555.68	61.6696	1548.14	15.2321	1516.25	13.125	1509.99	11.85	1535.78	13.75	1488.02	7.28571	1454.34	14.6625	1503.67	11.125	1500.22	10.4792	1517.61	9.65
1596.45	46.3131	1564.09	27.5057	1537.53	16.625	1543.57	14.1	1528.87	10.8056	1525.15	14.3182	1534.14	14.3095	1543.89	22.9286	1557.57	67.5	1550.04	15.8929	1518.16	11.825	1511.89	9.45	1537.68	18.5833	1489.93	9.42857	1456.25	14.55	1505.57	11.3393	1502.13	11.9375	1519.51	11.625
1598.33	35.8906	1565.99	32.6264	1539.43	20.3125	1545.47	17.55	1530.77	11.8426	1527.05	13.7273	1536.03	13.7619	1545.78	20.0238	1559.46	69.9643	1551.93	17.6071	1520.06	11.65	1513.79	10.45	1539.58	15.25	1491.84	11.0714	1458.17	15.35	1507.47	11.875	1504.03	11.4375	1521.41	11.6
1600.21	29.0973	1567.88	36.9885	1541.32	17.6875	1547.36	15.825	1532.67	12.8981	1528.95	14.5682	1537.93	14.0952	1547.68	20.619	1561.35	66.375	1553.82	19.4107	1521.96	11.825	1515.7	9.9	1541.47	17.3333	1493.75	9.85714	1460.08	13.85	1509.38	10.6607	1505.94	10.0625	1523.31	10.525
1602.09	24.8602	1569.76	43.3103	1543.22	15.75	1549.26	17.125	1534.56	11.6944	1530.85	13.2727	1539.83	14.4048	1549.57	21.9048	1563.24	63.7946	1555.72	22.8839	1523.86	12.475	1517.6	10.575	1543.37	16.0833	1495.65	6.21429	1462	13.475	1511.28	10.8036	1507.84	9.97917	1525.21	11.075
1603.97	22.4498	1571.65	51.954	1545.12	17.5625	1551.15	16.8	1536.46	13.7315	1532.75	13.8182	1541.72	14.5476	1551.47	22.0238	1565.13	64.3929	1557.61	26.0446	1525.76	12	1519.5	11.575	1545.27	18.8333	1497.56	6.92857	1463.91	14.1875	1513.18	11.1429	1509.74	10.375	1527.11	12.0125
1605.86	19.9666	1573.54	64.046	1547.01	17.4375	1553.04	22.425	1538.36	10.3704	1534.65	15.25	1543.62	14.2619	1553.36	25.4048	1567.02	66.2768	1559.5	25	1527.66	10.875	1521.4	9.225	1547.16	20	1499.47	12.8571	1465.83	13.4875	1515.09	11	1511.65	10.2083	1529.01	10.5375
1607.74	19.4255	1575.43	82.4598	1548.9	19.25	1554.94	22.475	1540.25	10.4259	1536.54	13.7273	1545.52	15.5	1555.25	31.2857	1568.91	69.1429	1561.39	22.5	1529.56	11.8	1523.3	10.425	1549.05	22.6667	1501.37	15.5714	1467.74	13.15	1516.99	10.875	1513.55	10.3542	1530.91	9.05
1609.62	17.2401	1577.32	104.655	1550.8	25.25	1556.83	26.425	1542.15	13.8333	1538.44	14.625	1547.41	15.3095	1557.15	36.9524	1570.8	74.3571	1563.28	22.3571	1531.46	12.675	1525.2	10.45	1550.95	23.5833	1503.28	12	1469.65	14.3375	1518.89	12.2321	1515.45	11.3333	1532.81	11.4625
1611.5	16.3161	1579.21	136.713	1552.69	30.375	1558.72	30.9	1544.05	12.8519	1540.34	15.1477	1549.31	18.7857	1559.04	37.7857	1572.69	80.4554	1565.18	23.8661	1533.35	13.175	1527.1	12.2	1552.84	24.5833	1505.18	14.2143	1471.57	12.575	1520.79	10.5179	1517.35	11.5625	1534.7	12.25
1613.38	16.1976	1581.09	178.247	1554.59	30.5	1560.61	29.85	1545.94	11.8241	1542.23	16.3295	1551.2	17.7381	1560.93	33.4048	1574.58	88.3482	1567.07	27.5357	1535.25	10.625	1529	10.9	1554.74	22.1667	1507.09	12.8571	1473.48	13.85	1522.69	9.17857	1519.26	10.9792	1536.6	9.825
1615.26	15.003	1582.98	224.529	1556.48	35.5625	1562.51	27.125	1547.84	12.6759	1544.13	14.0909	1553.09	21	1562.82	37.4048	1576.47	102.589	1568.96	30.7054	1537.15	11.5	1530.9	9.925	1556.63	27.0833	1508.99	14.1429	1475.39	14.4125	1524.59	12.375	1521.16	11.0208	1538.5	10.375
1617.14	14.4438	1584.87	261.575	1558.37	39.1875	1564.4	31.8	1549.73	15.1389	1546.02	15.5227	1554.99	24.5476	1564.71	41.4524	1578.36	123.902	1570.84	38.1429	1539.05	11.225	1532.8	9.975	1558.52	31.4167	1510.89	5.92857	1477.3	13.8125	1526.49	10.0893	1523.06	10.1458	1540.39	11.25
1619.01	14.4924	1586.75	272.569	1560.26	38.9375	1566.29	34.075	1551.62	14.5556	1547.92	14.0568	1556.88	24.7619	1566.6	46.7857	1580.24	144.107	1572.73	45.3036	1540.94	13.05	1534.69	10.675	1560.41	32.25	1512.8	11.7857	1479.21	13.6625	1528.39	11.1786	1524.96	11.1875	1542.29	10.8375
1620.89	14.0395	1588.64	241.132	1562.15	34.3125	1568.18	45.75	1553.52	14.5093	1549.81	15.25	1558.77	30.8095	1568.49	53.3095	1582.13	172.134	1574.62	59.6161	1542.84	13.275	1536.59	9.925	1562.3	22.1667	1514.7	10.5	1481.12	12	1530.29	10.0893	1526.86	11.2292	1544.19	11.2375
1622.77	14.2584	1590.52	185.132	1564.05	44	1570.07	55.125	1555.41	22.8519	1551.71	16.9659	1560.66	29.6429	1570.38	65.8333	1584.02	201.768	1576.51	73.0536	1544.73	13.25	1538.49	9.55	1564.2	20.8333	1516.6	8.78571	1483.03	14.1125	1532.19	11.5893	1528.76	10.3125	1546.08	10.1625
1624.65	13.9271	1592.41	130.523	1565.94	49.6875	1571.96	67.075	1557.3	26.3333	1553.6	19.0795	1562.55	22.6905	1572.27	82.7381	1585.9	221.661	1578.4	91.0804	1546.63	11.35	1540.39	9.55	1566.09	26.75	1518.5	7.71429	1484.94	14.2625	1534.09	10.1964	1530.66	12.7917	1547.98	12.1
1626.52	13.7933	1594.29	86.4368	1567.83	64.5	1573.85	89.25	1559.2	23.463	1555.49	21.25	1564.44	26.3333	1574.16	103.31	1587.79	223.768	1580.29	117.455	1548.52	16.675	1542.28	10.45	1567.98	35.0833	1520.4	7.85714	1486.85	13.65	1535.98	12.4464	1532.55	10.7708	1549.87	9.425
1628.4	13.1216	1596.17	62.8276	1569.72	76.6875	1575.73	110.175	1561.09	20.287	1557.39	26.9318	1566.34	27.5952	1576.05	130.143	1589.67	196.446	1582.17	151.589	1550.42	15.375	1544.18	10.875	1569.87	40.0833	1522.3	7.85714	1488.76	12.15	1537.88	10.625	1534.45	12.5625	1551.76	13.5125
1630.27	12.6049	1598.06	50.1667	1571.61	94.5	1577.62	150.9	1562.98	20.4259	1559.28	26.6364	1568.23	29.7381	1577.94	169.714	1591.56	154.679	1584.06	198.688	1552.31	16.125	1546.07	9.725	1571.76	39.5833	1524.2	9.78571	1490.67	13.5625	1539.78	10.5893	1536.35	11.875	1553.66	16.8125
1632.15	11.3982	1599.94	39.2011	1573.49	127.75	1579.51	192.75	1564.87	20.037	1561.17	24.125	1570.11	33.6667	1579.82	212.833	1593.44	122.875	1585.94	249.857	1554.21	17.325	1547.97	11.275	1573.64	55.5833	1526.1	10.3571	1492.58	12.2625	1541.67	12.7321	1538.25	11.1875	1555.55	16.9625
1634.02	12.0365	1601.82	34.3966	1575.38	149.5	1581.4	246.7	1566.76	26.8981	1563.06	20.5	1572	43.5952	1581.71	267	1595.33	97.3214	1587.83	273.911	1556.1	22.475	1549.86	12.25	1575.53	69.5833	1528	9.28571	1494.48	12.2	1543.57	12.1964	1540.14	11.375	1557.44	20.9125
1635.9	11.7082	1603.7	28.546	1577.27	198.25	1583.28	280.825	1568.65	27.6296	1564.95	23.4886	1573.89	50.4762	1583.6	347.714	1597.21	86.625	1589.71	255.455	1557.99	26.55	1551.76	13.475	1577.42	93.1667	1529.9	10.3571	1496.39	14.3	1545.47	12.1786	1542.04	12.25	1559.34	20.75
1637.77	11.1398	1605.59	26.5747	1579.16	266.375	1585.17	284.4	1570.54	31.8981	1566.84	25.3068	1575.78	65.8333	1585.48	426.333	1599.09	74.0268	1591.6	191.473	1559.88	23.3	1553.65	14.325	1579.31	121.75	1531.8	8.42857	1498.3	13.8375	1547.36	12.6071	1543.93	13.375	1561.23	15.65
1639.65	11.462	1607.47	25.6034	1581.05	330.438	1587.05	238.025	1572.43	40.8148	1568.73	29.625	1577.67	84.619	1587.37	450.238	1600.98	72.3661	1593.48	130.536	1561.77	19.275	1555.54	15.625	1581.19	153.667	1533.7	10.8571	1500.2	13.4625	1549.26	11.6964	1545.83	11.8542	1563.12	14.825
1641.52	11.9392	1609.35	22.7701	1582.93	352.438	1588.94	173.775	1574.32	50.5741	1570.62	37.6477	1579.56	107.976	1589.25	398.476	1602.86	68.3571	1595.37	86.9554	1563.67	16.625	1557.43	19.025	1583.08	189.25	1535.6	9.5	1502.11	12.3	1551.15	15.4286	1547.72	13.25	1565.01	16.8
1643.39	10.9453	1611.23	23.2184	1584.82	342.188	1590.82	112.6	1576.21	65.0185	1572.51	46.4318	1581.44	146.405	1591.14	296.905	1604.74	65.6161	1597.25	61.9554	1565.56	19.25	1559.33	21.975	1584.97	214.833	1537.49	13.0714	1504.01	12.6875	1553.04	13.3571	1549.62	13.5833	1566.9	18.775
1645.26	11.4681	1613.11	20.4885	1586.7	279.75	1592.71	78.85	1578.09	83.5741	1574.4	54.2614	1583.33	193.714	1593.02	199.31	1606.62	63.1964	1599.13	43.6696	1567.45	22.85	1561.22	15.95	1586.85	215	1539.39	13.7143	1505.92	12.2	1554.94	18.2321	1551.51	11.75	1568.79	16.8
1647.14	11.307	1614.99	20.1552	1588.59	198.625	1594.59	59.575	1579.98	105.056	1576.29	65.4659	1585.22	243.69	1594.91	134.167	1608.5	61.4911	1601.02	36.2946	1569.34	22.65	1563.11	14.775	1588.74	199.583	1541.29	10.9286	1507.82	13.05	1556.83	20.9643	1553.41	15.6667	1570.68	23.675
1649.01	11	1616.87	19.3218	1590.47	148.125	1596.48	45.825	1581.87	138.981	1578.18	82.6477	1587.1	279.952	1596.79	97.9524	1610.38	63.1071	1602.9	30.2589	1571.23	27.25	1565	16.85	1590.62	156.333	1543.18	10.7857	1509.73	13	1558.72	23.5893	1555.3	17.2917	1572.57	28.6125
1650.88	11.1884	1618.74	19.1494	1592.36	107.875	1598.36	34.775	1583.75	168.213	1580.06	106.693	1588.99	276.286	1598.67	74.6667	1612.26	58.5714	1604.78	26.8214	1573.11	29.275	1566.89	16.875	1592.51	114.667	1545.08	14.2143	1511.63	12.075	1560.61	20.2679	1557.19	24.8958	1574.46	34.3125
1652.75	10.8967	1620.62	20.6494	1594.24	76.625	1600.24	30.025	1585.64	198.481	1581.95	138.852	1590.87	217.095	1600.56	59.8333	1614.14	58.5982	1606.66	22.5893	1575	39.85	1568.78	17.35	1594.39	83.8333	1546.97	16.9286	1513.53	12.3	1562.5	18.4643	1559.08	24.625	1576.35	41.875
1654.62	10.4255	1622.5	19.9943	1596.13	61.3125	1602.12	27.525	1587.53	197.778	1583.84	183.75	1592.76	152.929	1602.44	48.1905	1616.02	59.25	1608.54	22.375	1576.89	49.675	1570.67	19.05	1596.28	66.3333	1548.87	10.2857	1515.44	12.575	1564.4	16.3393	1560.98	19.0833	1578.23	55.7125
1656.49	10.9666	1624.38	17.1724	1598.01	49.625	1604.01	22.8	1589.41	167.454	1585.72	231.682	1594.64	102.667	1604.32	43.3333	1617.9	59.0804	1610.42	20.4286	1578.78	57.075	1572.56	22.35	1598.16	53.75	1550.76	14.0714	1517.34	12.925	1566.29	19.875	1562.87	17.9792	1580.12	66.325
1658.36	10.0881	1626.25	18.3966	1599.89	35.9375	1605.89	23.15	1591.3	123.528	1587.61	265.58	1596.52	70.6429	1606.2	36.4762	1619.78	56.8929	1612.3	20.4464	1580.67	72.975	1574.45	30.65	1600.04	47.6667	1552.66	16.6429	1519.24	12.95	1568.18	22.6786	1564.76	17.4583	1582.01	84.1375
1660.23	11.8237	1628.13	18.6494	1601.77	35.875	1607.77	20.075	1593.18	86.3333	1589.49	257.83	1598.41	52.3571	1608.08	33.2619	1621.65	59.5357	1614.18	18.0536	1582.55	90.95	1576.34	33.45	1601.92	35.8333	1554.55	20.7857	1521.14	12.3	1570.07	23.1964	1566.65	17.8958	1583.89	115.6
1662.09	11.1854	1630	17.5402	1603.66	35.0625	1609.65	17.875	1595.06	60.5093	1591.38	208.364	1600.29	39.9048	1609.96	28.7143	1623.53	57.9732	1616.06	18.625	1584.44	106.225	1578.22	43.525	1603.81	31.3333	1556.44	24.3571	1523.04	13.8875	1571.95	28.7321	1568.54	19.625	1585.78	160.863
1663.96	11.2188	1631.88	17.7529	1605.54	30.375	1611.53	16.025	1596.95	46.1389	1593.26	144.795	1602.17	34.7857	1611.84	30.8571	1625.41	56.9286	1617.94	17.1696	1586.32	122.975	1580.11	56.325	1605.69	30	1558.33	24.7143	1524.94	12.35	1573.84	36.4464	1570.43	20.5417	1587.67	189.4
1665.83	10.2097	1633.75	16.2931	1607.42	28.5	1613.41	18	1598.83	33.6111	1595.15	95.9545	1604.05	30.619	1613.72	26.619	1627.28	57.6339	1619.82	18.1875	1588.21	127.075	1582	73	1607.57	25	1560.23	28.5714	1526.84	12.2875	1575.73	44.1964	1572.32	29.5	1589.55	189.887
1667.7	10.3891	1635.63	16.6322	1609.3	31.375	1615.29	14.975	1600.71	28.2037	1597.03	65.4205	1605.93	27	1615.6	25.6905	1629.16	57.0536	1621.69	16.6786	1590.1	113.65	1583.88	88.25	1609.45	26.1667	1562.12	28.9286	1528.74	12.2375	1577.62	56	1574.21	31.3542	1591.43	158.512
1669.56	10	1637.5	16.4253	1611.18	28.125	1617.17	14.275	1602.6	25.5556	1598.91	49.2386	1607.81	22.0714	1617.48	21.9048	1631.03	58.1339	1623.57	16.5625	1591.98	92.7	1585.77	104.375	1611.33	26.5	1564.01	22.5	1530.64	13.8125	1579.51	74.3393	1576.1	39.9792	1593.32	108.25
1671.43	10.4468	1639.38	15.408	1613.06	20.8125	1619.04	15.55	1604.48	22.7407	1600.79	37.6364	1609.69	21.9048	1619.36	20.619	1632.91	56.4732	1625.45	17.8214	1593.86	70.725	1587.65	119.975	1613.21	24.0833	1565.9	21.2857	1532.54	12.275	1581.39	96.75	1577.98	51	1595.2	64.4625
1673.29	10.2401	1641.25	16.4713	1614.94	22	1620.92	17.55	1606.36	19.0278	1602.68	31.8409	1611.57	17.1905	1621.23	25.8571	1634.78	56.6071	1627.32	18.8125	1595.75	56.425	1589.54	127.5	1615.09	19.4167	1567.79	25.2857	1534.43	11.5375	1583.28	128.286	1579.87	63.4167	1597.09	46.45
1675.16	10.6079	1643.12	16.408	1616.82	20.9375	1622.8	14.85	1608.24	17.75	1604.56	26.7045	1613.45	19.9048	1623.11	22.3095	1636.66	56.875	1629.2	16.4196	1597.63	39.225	1591.42	119.525	1616.97	22.6667	1569.68	36.5	1536.33	12.1625	1585.17	174.375	1581.76	90.9375	1598.97	33.025
1677.02	10.3739	1644.99	15.5517	1618.7	22.3125	1624.68	15.925	1610.12	15.1204	1606.44	25.7045	1615.33	17.3095	1624.99	22.8333	1638.53	57.2679	1631.07	15.5179	1599.51	29.375	1593.31	104.125	1618.84	19.75	1571.57	45.2143	1538.23	12.725	1587.05	215	1583.64	125.812	1600.85	25.025
1678.89	10.228	1646.87	15.2184	1620.57	16.125	1626.55	14.65	1612	16.9259	1608.32	22.7159	1617.21	18.1667	1626.86	22.3333	1640.41	56.2054	1632.95	14.125	1601.4	25.8	1595.19	84.575	1620.72	17.3333	1573.46	54.0714	1540.13	12.5	1588.94	229.607	1585.53	178.125	1602.73	21.9125
1680.75	10.4772	1648.74	15.7989	1622.45	21.25	1628.43	16.775	1613.88	15.9167	1610.2	20.2727	1619.09	17.2381	1628.74	20.119	1642.28	58.1429	1634.82	14.4375	1603.28	20.95	1597.08	58.45	1622.6	12	1575.35	73.2143	1542.02	13.9875	1590.82	192.554	1587.42	219.146	1604.62	19.5625
1682.62	10.7568	1650.61	16.8506	1624.33	19.75	1630.3	15.075	1615.76	15.1481	1612.08	18.7841	1620.97	15.5714	1630.62	20.8333	1644.15	54.7143	1636.7	12.8839	1605.16	18.675	1598.96	44.55	1624.48	14.1667	1577.23	94.4286	1543.92	12.575	1592.71	137.911	1589.3	222.188	1606.5	16.625
1684.48	10.2979	1652.48	16.1839	1626.2	18.1875	1632.18	15.15	1617.64	13.2685	1613.96	19.4318	1622.85	16.9762	1632.49	17.881	1646.02	57.2589	1638.57	13.8482	1607.04	19.875	1600.84	30.55	1626.35	15	1579.12	114.214	1545.81	13.3	1594.59	85.1607	1591.19	182.688	1608.38	13.9875
1686.34	10.4559	1654.35	14.3793	1628.08	15.1875	1634.05	13.525	1619.52	14.0926	1615.84	17.7614	1624.72	15.119	1634.37	17.5952	1647.89	57.9286	1640.44	12.9286	1608.92	17.2	1602.72	21.45	1628.23	21.75	1581.01	145.357	1547.71	12.925	1596.47	58.3929	1593.07	126.208	1610.26	15.85
1688.2	9.55015	1656.22	15.8621	1629.96	22.9375	1635.93	13.225	1621.39	14.6944	1617.72	16.75	1626.6	13.5714	1636.24	17.381	1649.76	57.0714	1642.32	12.3571	1610.8	17	1604.6	23.35	1630.1	20.0833	1582.89	164.143	1549.6	16.025	1598.36	39.3393	1594.95	79.7917	1612.14	13.5625
1690.07	10.3556	1658.09	14.7816	1631.83	16.875	1637.8	12.875	1623.27	13.1481	1619.6	17.0568	1628.47	15.5238	1638.11	18.7381	1651.64	57.9107	1644.19	13.5	1612.68	14.325	1606.49	17.775	1631.98	12.1667	1584.78	178	1551.5	14.55	1600.24	30.6071	1596.84	51	1614.02	11.575
1691.93	10.4195	1659.96	14.6724	1633.71	13.8125	1639.68	13.8	1625.15	13.0185	1621.47	18.4205	1630.35	16.4048	1639.99	17.3333	1653.51	59.0268	1646.06	11.4107	1614.56	13.275	1608.37	15.975	1633.85	11	1586.67	168.5	1553.39	16.5875	1602.12	24.9107	1598.72	37.3958	1615.9	13.1625
1693.79	10.5137	1661.82	14.5402	1635.58	15.8125	1641.55	12.65	1627.02	14.6852	1623.35	17.0455	1632.23	12.7857	1641.86	15.4048	1655.38	59.6964	1647.93	12.5625	1616.44	13.725	1610.25	15.2	1635.73	18.6667	1588.55	142.857	1555.28	19.6875	1604	21.7857	1600.6	28.4167	1617.77	13.6375
1695.65	9.99088	1663.69	13.9023	1637.46	14.125	1643.42	12.75	1628.9	12.4074	1625.23	17.7045	1634.1	14	1643.73	12.9286	1657.24	58.5268	1649.8	11.4196	1618.32	11.725	1612.13	12.025	1637.6	18	1590.44	113.071	1557.18	24.775	1605.89	21.1786	1602.48	25.7708	1619.65	12.3375
1697.51	10.2584	1665.56	16.2184	1639.33	11.625	1645.29	11.8	1630.78	11.0741	1627.1	13.7614	1635.97	15.8095	1645.6	14.8095	1659.11	57.6964	1651.67	10.8214	1620.2	15.375	1614.01	14.675	1639.48	15.25	1592.32	88.9286	1559.07	23.6375	1607.77	18.375	1604.37	20.75	1621.53	11.1875
1699.37	9.69605	1667.43	16.0517	1641.2	12.4375	1647.17	15.95	1632.65	12.1944	1628.98	15.2841	1637.85	13.1429	1647.48	15.5714	1660.98	59.1964	1653.55	10.1786	1622.07	14.95	1615.89	12.025	1641.35	14.0833	1594.21	66.2857	1560.96	21.95	1609.65	16.1964	1606.25	18.4375	1623.41	13.9125
1701.23	10.8207	1669.29	14.6322	1643.07	17.6875	1649.04	10.3	1634.52	12.9352	1630.86	14.5341	1639.72	14.119	1649.35	15.1667	1662.85	57.1161	1655.41	9.625	1623.95	14.2	1617.76	11.2	1643.22	12.3333	1596.09	50.5714	1562.85	19.975	1611.53	17	1608.13	15.9375	1625.28	10.9375
1703.09	9.76596	1671.16	14.5977	1644.95	11.625	1650.91	13.125	1636.4	11.25	1632.73	16.0114	1641.59	14.3095	1651.22	17.3095	1664.72	56.3929	1657.28	11.4196	1625.83	14.725	1619.64	12.375	1645.09	14.8333	1597.97	34.2143	1564.74	17.6625	1613.41	14.9107	1610.01	15.5625	1627.16	11.0375
1704.95	10.6109	1673.03	15.5862	1646.82	12.9375	1652.78	11.15	1638.27	11.6944	1634.61	13.5114	1643.47	15.1429	1653.09	14.8571	1666.59	57.3661	1659.15	13.0714	1627.7	15.575	1621.52	12.525	1646.97	11.5833	1599.85	31.3571	1566.63	21.25	1615.28	13.3929	1611.89	16.375	1629.04	12.7875
1706.8	9.62614	1674.89	14.4655	1648.69	14.9375	1654.65	11.425	1640.15	12.75	1636.48	12.6591	1645.34	12.6667	1654.96	14.8333	1668.45	56.1339	1661.02	12.6607	1629.58	15	1623.4	15.3	1648.84	16.4167	1601.74	26.6429	1568.52	24.4125	1617.16	12.6607	1613.77	14.1458	1630.91	12.4625
1708.66	11.0608	1676.76	15.6667	1650.56	15	1656.52	11.725	1642.02	11.9722	1638.35	13.7955	1647.21	11.6667	1656.83	16.2143	1670.32	55.7589	1662.89	11.375	1631.45	11.75	1625.27	13.9	1650.71	11.4167	1603.62	23.5714	1570.41	28.375	1619.04	14.6964	1615.65	13.3125	1632.79	11
1710.52	10.5745	1678.62	14.6264	1652.43	13	1658.39	13.825	1643.89	13.0463	1640.23	13.2614	1649.08	13.5952	1658.7	14.3571	1672.18	56.0268	1664.76	11.6964	1633.33	12.975	1627.15	12.5	1652.58	12	1605.5	24.7143	1572.3	31	1620.92	13.0357	1617.53	14.2083	1634.66	10.4
1712.37	10.2462	1680.48	15.4368	1654.3	13	1660.26	12.4	1645.76	12.2685	1642.1	11.25	1650.95	16.2619	1660.56	16.1905	1674.05	58.5179	1666.62	10.1161	1635.2	13.325	1629.03	12.05	1654.45	11.5833	1607.38	22.7857	1574.19	39.9	1622.8	12.1071	1619.4	10.2292	1636.54	11.85
1714.23	10.2675	1682.35	14.8966	1656.17	11.375	1662.12	10.625	1647.64	11.5648	1643.97	13.1818	1652.82	13.5	1662.43	16.0238	1675.91	54.5179	1668.49	12.2768	1637.08	11.75	1630.9	11.7	1656.32	18.9167	1609.26	20.2857	1576.08	50.825	1624.67	12.6786	1621.28	12.75	1638.41	9.9125
1716.09	10.5836	1684.21	13.8736	1658.04	13.625	1663.99	9.85	1649.51	11.0648	1645.84	11.6705	1654.69	12.4048	1664.3	14.1905	1677.78	55.5893	1670.36	10.125	1638.95	12.3	1632.78	11.175	1658.19	10.75	1611.14	12.4286	1577.97	66.25	1626.55	11.3571	1623.16	12.8958	1640.28	9.4375
1717.94	10.6809	1686.07	15.0057	1659.91	7.1875	1665.86	9.6	1651.38	11.4907	1647.72	13.875	1656.56	13.5238	1666.17	13.5476	1679.64	54.8125	1672.22	11.9375	1640.82	11.5	1634.65	12.3	1660.06	16.75	1613.02	11	1579.85	84.125	1628.43	11.5357	1625.04	14.3958	1642.16	10.9875
1719.8	10.8906	1687.94	14.8046	1661.78	13.125	1667.73	12.7	1653.25	10.6296	1649.59	12.2273	1658.43	12.6667	1668.03	15.9048	1681.51	53.25	1674.09	11.625	1642.7	10.525	1636.52	8.8	1661.92	10.1667	1614.9	17.4286	1581.74	108.6	1630.3	13.2143	1626.91	13.4375	1644.03	10.1625
1721.65	11.0547	1689.8	15.092	1663.65	11.5625	1669.59	10.35	1655.12	10.9537	1651.46	13.5568	1660.3	13.4286	1669.9	16.2143	1683.37	53.0804	1675.95	11.5179	1644.57	12.9	1638.4	11.3	1663.79	11.9167	1616.78	15.0714	1583.63	140.8	1632.18	9.55357	1628.79	12.2917	1645.9	10.7625
1723.51	10.2705	1691.66	15.6379	1665.51	11.6875	1671.46	12.325	1656.99	11.2778	1653.33	11.6932	1662.17	13.9048	1671.77	14.7381	1685.23	54.8839	1677.82	11.7679	1646.44	13.275	1640.27	12.575	1665.66	11.8333	1618.66	8.42857	1585.51	162.875	1634.05	12.4286	1630.66	11.6042	1647.77	9.5125
1725.36	10.6809	1693.52	13.7874	1667.38	15.5625	1673.32	12.475	1658.86	10.2407	1655.2	10.2159	1664.04	16.0714	1673.63	17.6905	1687.1	52.7143	1679.68	10.9911	1648.31	11.275	1642.14	9.625	1667.53	10.5	1620.54	16.0714	1587.4	173.512	1635.93	12.0536	1632.54	11.0208	1649.64	11.175
1727.21	10.5562	1695.38	14.9713	1669.25	9.6875	1675.19	12.5	1660.72	10.2685	1657.07	12.7841	1665.9	15.8095	1675.5	15.5714	1688.96	54.2946	1681.55	10.7679	1650.18	11.125	1644.02	15.9	1669.39	13.5	1622.41	13.0714	1589.28	149.938	1637.8	10.6429	1634.41	9.72917	1651.51	8.25
1729.06	10.2918	1697.24	16.4195	1671.11	13.8125	1677.05	12.575	1662.59	9.81481	1658.94	13.3068	1667.77	10.1667	1677.36	14.6667	1690.82	55.7946	1683.41	12.2589	1652.05	9.3	1645.89	10.525	1671.26	13.5	1624.29	10.2857	1591.17	116.138	1639.67	10.5	1636.29	13.1667	1653.38	7.95
1730.92	10.5289	1699.1	15.8276	1672.98	8.125	1678.92	11.475	1664.46	12.6481	1660.8	12.4205	1669.64	12.7857	1679.23	14.5	1692.68	54.7232	1685.27	11.2143	1653.92	11.95	1647.76	10.025	1673.13	10.5	1626.17	15.4286	1593.05	83.5625	1641.55	10.7857	1638.16	10.1667	1655.25	11.5125
1732.77	9.31915	1700.96	16.5517	1674.84	12.6875	1680.78	11.9	1666.33	11.1852	1662.67	12.1818	1671.5	10.4524	1681.09	14.4524	1694.54	55.2946	1687.13	10.6429	1655.79	11.375	1649.63	8.95	1674.99	13.5	1628.04	13.7857	1594.94	60.1	1643.42	10.4821	1640.03	10.5625	1657.12	9.7
1734.62	10.7447	1702.82	15.431	1676.71	12.5	1682.65	14.875	1668.2	10.0833	1664.54	11.5909	1673.37	11.7857	1682.95	16.1905	1696.4	54.9732	1689	12.3839	1657.66	9.45	1651.5	8.25	1676.86	13.5833	1629.92	17.5714	1596.82	43.825	1645.29	10.5714	1641.91	9.08333	1658.99	7.9
1736.47	10.8541	1704.68	13.9655	1678.57	12.4375	1684.51	11.375	1670.06	10.213	1666.41	12.0568	1675.23	11.1905	1684.82	14.4048	1698.26	53.3482	1690.86	12.9196	1659.53	12.325	1653.37	11.075	1678.72	9.41667	1631.79	12.8571	1598.7	34.525	1647.16	9.41071	1643.78	10.5833	1660.86	10.3375
1738.32	10.3252	1706.53	15.1609	1680.44	14.75	1686.37	12.575	1671.93	13.0093	1668.27	13.3182	1677.1	11.6429	1686.68	14.2857	1700.12	55.75	1692.72	11.3125	1661.4	11.75	1655.24	10.025	1680.58	12.4167	1633.67	9.71429	1600.59	27.1875	1649.03	10.4286	1645.65	11.7083	1662.73	12.0125
1740.17	9.76596	1708.39	13.9138	1682.3	13.3125	1688.23	12.675	1673.79	9.0463	1670.14	11.1705	1678.96	11.5	1688.54	15.4048	1701.98	53.3214	1694.58	11.625	1663.27	8.45	1657.11	8.925	1682.45	11.6667	1635.54	12.6429	1602.47	22.9125	1650.91	11.9464	1647.52	9.8125	1664.6	10.3875
1742.02	10.9422	1710.25	16.1149	1684.16	13.1875	1690.1	11.35	1675.66	10.5741	1672.01	11.7273	1680.83	14.4762	1690.4	14.619	1703.84	51.8661	1696.44	10.6071	1665.14	10.925	1658.98	11.225	1684.31	16.1667	1637.42	12.1429	1604.35	20.025	1652.78	10	1649.4	10.7917	1666.46	10.025
1743.87	9.14894	1712.11	15.9483	1686.03	8.4375	1691.96	14.525	1677.52	10.2778	1673.87	12.1705	1682.69	11.5476	1692.26	12.3095	1705.7	54.4286	1698.3	11.5446	1667	12.425	1660.85	10.225	1686.17	19.8333	1639.29	7	1606.23	20.3625	1654.65	9.67857	1651.27	11.8333	1668.33	12.0375
1745.72	10.2918	1713.96	14.5	1687.89	14.1875	1693.82	11.475	1679.39	10.6574	1675.74	12.5227	1684.55	14.0476	1694.12	16.8571	1707.55	54.6161	1700.16	11.5446	1668.87	12.475	1662.72	11.4	1688.04	12.75	1641.16	6.5	1608.11	18.6125	1656.52	11.4643	1653.14	12.5417	1670.2	9.2875
1747.57	10.3222	1715.82	15.1667	1689.75	11.8125	1695.68	10.875	1681.25	11.1296	1677.6	12.7045	1686.42	14.1667	1695.98	13.9286	1709.41	53.3125	1702.02	10.6518	1670.74	11.975	1664.58	8.375	1689.9	11.1667	1643.04	9.14286	1609.99	14.85	1658.38	8.53571	1655.01	11.1667	1672.06	8.8625
1749.42	10.228	1717.67	15.5115	1691.61	12.625	1697.54	11.825	1683.11	11.1759	1679.47	11.3636	1688.28	10.6667	1697.84	15.8571	1711.27	55.4107	1703.88	10.9732	1672.6	11.775	1666.45	10.95	1691.76	13	1644.91	14.0714	1611.87	14.425	1660.25	10.9821	1656.88	9.97917	1673.93	9.6125
1751.26	9.90274	1719.53	14.7874	1693.47	15.0625	1699.4	13.45	1684.98	9.77778	1681.33	12.9432	1690.14	13.7143	1699.7	12.4048	1713.12	54.3661	1705.73	10.6607	1674.47	9.225	1668.32	8.95	1693.62	12	1646.78	9.78571	1613.75	14.575	1662.12	10.6607	1658.74	10.3958	1675.79	10.325
1753.11	11.3404	1721.38	15.7529	1695.33	9.6875	1701.26	11.525	1686.84	10.5741	1683.19	10.2614	1692	12.0476	1701.56	12.4286	1714.98	53.4196	1707.59	10.375	1676.33	10.375	1670.19	8.875	1695.48	17.5833	1648.65	7.71429	1615.63	16.475	1663.99	10.8036	1660.61	9.72917	1677.66	9.45
1754.96	10.2249	1723.24	15.0632	1697.19	8	1703.12	12.3	1688.7	10.5648	1685.06	12.3409	1693.86	11.1905	1703.42	16.7381	1716.84	54.4196	1709.45	11.2232	1678.2	13	1672.05	11.4	1697.34	14.25	1650.52	12	1617.51	14.15	1665.86	9.83929	1662.48	8.66667	1679.52	9.9
1756.81	10.2948	1725.09	16.1954	1699.05	14.1875	1704.97	10.9	1690.56	12.7315	1686.92	12.125	1695.72	12.7381	1705.28	16	1718.69	51.9464	1711.31	10.5714	1680.06	9.325	1673.92	13.1	1699.2	12.3333	1652.39	12.9286	1619.39	15.375	1667.72	9.05357	1664.35	10.0417	1681.39	10.2
1758.65	10.5319	1726.94	16.5115	1700.91	13.6875	1706.83	13.225	1692.43	10.2685	1688.78	13.0114	1697.58	11.9286	1707.14	15.881	1720.55	56.6786	1713.16	12.5268	1681.92	9.1	1675.78	7.95	1701.06	11	1654.26	14.5	1621.26	15.3	1669.59	8.98214	1666.22	11.3125	1683.25	9.4375
1760.5	10.8815	1728.8	16.5977	1702.77	9.5625	1708.69	13.25	1694.29	11.1111	1690.64	12.2614	1699.44	13.0952	1708.99	13.5714	1722.4	53.2054	1715.02	11.1339	1683.79	11.7	1677.65	9.225	1702.92	13.6667	1656.13	10	1623.14	14.175	1671.46	10.375	1668.08	8.47917	1685.11	10.05
1762.34	10.9027	1730.65	16.6437	1704.63	10.375	1710.55	12.625	1696.15	11.5833	1692.5	13.2045	1701.3	11.5476	1710.85	13.5	1724.25	53.5357	1716.87	11.3482	1685.65	11.75	1679.51	9.65	1704.78	17.1667	1658	10.2143	1625.02	14.125	1673.32	10.6429	1669.95	9.14583	1686.97	11.9625
1764.19	10.2857	1732.5	15.2184	1706.49	13.125	1712.4	11.45	1698.01	10.3056	1694.37	12.2614	1703.16	13.5952	1712.71	16.7143	1726.11	54.7768	1718.73	12.1696	1687.51	10.5	1681.37	9.175	1706.63	15.25	1659.87	13.5	1626.9	14.0625	1675.19	10.9821	1671.82	8.64583	1688.84	10.85
1766.03	10.4529	1734.35	14.8851	1708.35	12.5	1714.26	13.8	1699.87	8.75926	1696.23	12.9545	1705.02	11.3333	1714.56	15.1667	1727.96	55.2411	1720.58	10.1429	1689.37	10.55	1683.24	11.375	1708.49	10.4167	1661.74	9.57143	1628.77	14.125	1677.05	9.23214	1673.68	11.3958	1690.7	10.775
1767.87	10.9574	1736.2	14.8333	1710.2	9.25	1716.12	11.2	1701.73	11.7037	1698.09	10.8864	1706.88	11.119	1716.42	15.2619	1729.81	56.1429	1722.44	10.1786	1691.24	12.25	1685.1	9.225	1710.35	9.75	1663.61	6.92857	1630.65	12.025	1678.92	10.125	1675.55	9.47917	1692.56	10.3375
1769.72	10.5957	1738.05	13.7414	1712.06	11.8125	1717.97	11.625	1703.58	11.7963	1699.94	11.8636	1708.73	10.0476	1718.28	12.3571	1731.66	56.1964	1724.29	12.3482	1693.1	11.475	1686.96	10.75	1712.21	11.9167	1665.47	9.57143	1632.52	12.45	1680.78	10.4821	1677.41	10.7083	1694.42	11.05
1771.56	10.1459	1739.9	15.7414	1713.92	11.25	1719.83	11.55	1705.44	10.0648	1701.8	12.5227	1710.59	12.4762	1720.13	14.7619	1733.52	54.7768	1726.15	11.9286	1694.96	9.9	1688.82	11.15	1714.06	14.9167	1667.34	9.85714	1634.4	12.65	1682.64	10.6071	1679.28	7.4375	1696.28	9.1625
1773.4	9.72948	1741.75	15.569	1715.77	12.625	1721.68	12.225	1707.3	8.7963	1703.66	11.6818	1712.45	11.0476	1721.98	12.6667	1735.37	55.3393	1728	11.1964	1696.82	12.025	1690.69	9.65	1715.92	8.16667	1669.21	8.28571	1636.27	12.8625	1684.51	8.32143	1681.14	10.7917	1698.14	8.975
1775.25	10.2128	1743.6	14.6034	1717.63	12.0625	1723.53	10.85	1709.16	10.213	1705.52	12.4318	1714.3	13.5714	1723.84	13.5	1737.22	58.1339	1729.85	12.625	1698.68	8.775	1692.55	11.625	1717.77	13.5	1671.07	6.57143	1638.14	12.9125	1686.37	9.26786	1683	8.75	1700	9.6875
1777.09	10.4347	1745.45	14.5287	1719.48	13.3125	1725.39	13.3	1711.01	11.4907	1707.38	12.5455	1716.16	13.4048	1725.69	14.2143	1739.07	53.8125	1731.7	10.1786	1700.54	11.05	1694.41	9.725	1719.63	14.25	1672.94	8.78571	1640.02	13.4	1688.23	10.4464	1684.87	10.4375	1701.86	8.6
1778.93	10.4681	1747.3	15	1721.34	12.4375	1727.24	11.55	1712.87	9.40741	1709.24	12.7045	1718.01	11.7381	1727.54	13.6905	1740.92	53.5	1733.55	10.0982	1702.4	13.5	1696.27	10.125	1721.48	12.6667	1674.8	8.42857	1641.89	11.4	1690.09	10.1964	1686.73	9.375	1703.72	8.6875
1780.77	10.0729	1749.15	14.7126	1723.19	10	1729.09	10.475	1714.73	9.90741	1711.09	11.0455	1719.87	11.5476	1729.4	14.5	1742.77	55.9196	1735.41	9.63393	1704.25	13.45	1698.13	8.7	1723.34	12.3333	1676.67	8.78571	1643.76	12.0375	1691.95	8.03571	1688.59	10.9375	1705.58	9.7375
1782.61	10.6839	1751	15.6667	1725.05	11	1730.95	12.35	1716.58	10.9907	1712.95	11.4205	1721.72	14.2619	1731.25	14.2381	1744.62	56.5089	1737.26	11.0446	1706.11	10.725	1699.99	7.85	1725.19	13.4167	1678.53	7.42857	1645.64	12.325	1693.81	10.6607	1690.45	9.625	1707.43	10.075
1784.45	10.3222	1752.84	13.7069	1726.9	13.6875	1732.8	13.4	1718.44	9.58333	1714.81	12.2273	1723.58	12.2619	1733.1	14.0238	1746.47	53.9911	1739.11	12.5268	1707.97	10.225	1701.85	10.525	1727.04	15.4167	1680.4	8.71429	1647.51	12	1695.68	11.0179	1692.31	12.7083	1709.29	9.2
1786.29	10.3191	1754.69	15.3793	1728.75	10.25	1734.65	10.325	1720.29	11.9074	1716.66	11.9886	1725.43	14.7143	1734.95	15	1748.31	54	1740.96	12.9643	1709.83	13.175	1703.71	13.125	1728.9	7.5	1682.26	12.9286	1649.38	11.95	1697.54	11.2679	1694.17	12.0833	1711.15	8.575
1788.13	10.0152	1756.54	13.477	1730.6	15	1736.5	12.25	1722.15	9.60185	1718.52	11.6023	1727.28	13.1905	1736.8	14.5	1750.16	54.3304	1742.81	10.9732	1711.68	10.9	1705.56	7.95	1730.75	12.75	1684.12	9.71429	1651.25	13.3375	1699.39	8.96429	1696.03	11.3958	1713	9.9375
1789.97	10.4863	1758.38	15.4425	1732.46	16.1875	1738.35	11.45	1724	9.59259	1720.37	11.0568	1729.14	10.4286	1738.65	14.4286	1752.01	54.6429	1744.66	9.41964	1713.54	9.95	1707.42	8.05	1732.6	14.3333	1685.99	11.5714	1653.12	12.4	1701.25	11.0536	1697.89	9.10417	1714.86	10.1
1791.81	9.61094	1760.23	14.8448	1734.31	9.0625	1740.2	14.525	1725.85	10.1481	1722.23	12.0455	1730.99	12.6429	1740.5	12.119	1753.86	52.3929	1746.5	11.6607	1715.4	12.725	1709.28	8.9	1734.45	18.75	1687.85	5.42857	1654.99	12.075	1703.11	10.3929	1699.75	9.25	1716.72	9.55
1793.64	10.8389	1762.07	15.6092	1736.16	11.75	1742.05	12.125	1727.71	11.3333	1724.08	12.0341	1732.84	10.2857	1742.35	15.9048	1755.7	53.6161	1748.35	10.5893	1717.25	11.6	1711.14	9.575	1736.3	18.25	1689.71	11.2857	1656.86	10.8625	1704.97	11.3929	1701.61	9.52083	1718.57	10.3625
1795.48	9.95745	1763.92	14.8908	1738.01	16.8125	1743.9	12.25	1729.56	10.6389	1725.93	13.2159	1734.69	13.9762	1744.2	13.5714	1757.55	54.6964	1750.2	11.5357	1719.11	10.05	1712.99	10.275	1738.15	14.9167	1691.57	9.64286	1658.73	12.6625	1706.83	9.5	1703.47	10.1458	1720.43	9.15
1797.32	10.8845	1765.76	16.1207	1739.86	13.4375	1745.75	11.575	1731.41	10.2685	1727.79	12.5114	1736.54	10.4762	1746.05	14.2143	1759.4	55.1696	1752.05	12.2143	1720.96	10.625	1714.85	11.425	1740	14.25	1693.43	10.2143	1660.6	11.4125	1708.69	11.3036	1705.33	10.7292	1722.28	8.725
1799.15	10.5988	1767.61	13.5115	1741.71	10.375	1747.6	11.85	1733.26	10	1729.64	11.3409	1738.39	14.4286	1747.9	15.4048	1761.24	51.9107	1753.89	10.5804	1722.82	11.1	1716.7	9.125	1741.85	14	1695.29	11.9286	1662.46	10.0875	1710.54	10.8036	1707.19	9.625	1724.13	10.8
1800.99	10.5289	1769.45	16.454	1743.56	12.9375	1749.45	14.7	1735.12	11.5648	1731.49	11.6932	1740.24	15.7857	1749.75	13.6667	1763.09	53.4643	1755.74	10.6071	1724.67	10.35	1718.56	10.85	1743.7	13.9167	1697.15	13.2143	1664.33	11.375	1712.4	9.60714	1709.05	9.5	1725.99	11.1625
1802.83	9.72644	1771.29	14.8391	1745.41	14.8125	1751.29	12.35	1736.97	9.55556	1733.34	12.0909	1742.09	10.7857	1751.6	13.119	1764.93	54.6071	1757.59	11.6339	1726.52	9.825	1720.41	9.65	1745.55	15	1699.01	10.8571	1666.2	12.3	1714.26	8.75	1710.9	11.1458	1727.84	11.0375
1804.66	10.9422	1773.14	15.5517	1747.26	10.375	1753.14	12.675	1738.82	9.7037	1735.19	13.3068	1743.94	13.8333	1753.44	12.1905	1766.77	52.3661	1759.43	9.875	1728.38	11.525	1722.27	11.65	1747.4	14.4167	1700.87	11.2857	1668.07	11.225	1716.11	10.5536	1712.76	10.5	1729.69	9.1875
1806.5	9.48328	1774.98	15.9253	1749.1	14.4375	1754.99	12.325	1740.67	11.8333	1737.04	13.1364	1745.79	14.2857	1755.29	13.4286	1768.62	54.2768	1761.28	11.2321	1730.23	9.9	1724.12	9.175	1749.25	14.75	1702.73	8.42857	1669.93	11.4875	1717.97	12.1964	1714.62	10.1042	1731.54	11.8125
1808.33	9.8997	1776.82	14.4368	1750.95	10.4375	1756.83	11.85	1742.52	12.0185	1738.9	10.625	1747.64	15.6429	1757.13	13.0952	1770.46	53.625	1763.12	10.8661	1732.08	9.025	1725.98	8.6	1751.1	15.9167	1704.59	10.2857	1671.8	12.5	1719.82	10.375	1716.47	11.2917	1733.4	10.5875
1810.17	10.6596	1778.66	15.431	1752.8	12.75	1758.68	12.3	1744.37	10.2593	1740.75	12.4659	1749.49	14.381	1758.98	13.9048	1772.3	54.4554	1764.97	11.1696	1733.93	11.25	1727.83	10.675	1752.94	16.8333	1706.45	10	1673.66	11.9875	1721.68	8.16071	1718.33	8.45833	1735.25	9.175
1812	10.5106	1780.5	15.954	1754.65	10	1760.53	12.55	1746.22	10.6204	1742.59	12.1932	1751.34	12.0476	1760.83	14.1667	1774.15	53.7143	1766.81	10.9911	1735.78	12.625	1729.68	9.3	1754.79	13.75	1708.31	12.5	1675.53	11.725	1723.53	11.7143	1720.18	11.2083	1737.1	11.2375
1813.83	10.1033	1782.34	14.3736	1756.49	15.125	1762.37	12.5	1748.06	9.75926	1744.44	12.0909	1753.18	12.381	1762.67	15.7381	1775.99	52.0625	1768.65	11.0625	1737.63	9.55	1731.53	11.525	1756.64	17.1667	1710.16	9.57143	1677.39	11.525	1725.38	10.5179	1722.04	9.54167	1738.95	9.7
1815.67	10.8024	1784.18	15.0977	1758.34	9.875	1764.22	12.125	1749.91	10.4444	1746.29	11.6932	1755.03	11.5238	1764.52	14.1667	1777.83	53.4643	1770.5	11.7232	1739.48	9.175	1733.38	9.975	1758.48	13.25	1712.02	14.7143	1679.26	8.075	1727.24	11.3036	1723.89	10.2917	1740.8	7.6375
1817.5	9.87538	1786.02	15.3736	1760.18	9.25	1766.06	12.575	1751.76	10.1296	1748.14	11.1932	1756.88	12.119	1766.36	11.3095	1779.67	51.9286	1772.34	11.7054	1741.33	12.275	1735.24	9.55	1760.33	10.9167	1713.88	14.5	1681.12	9.7375	1729.09	10.3036	1725.74	9.54167	1742.65	9.825
1819.33	10.4073	1787.86	15.0057	1762.03	12.1875	1767.9	11.75	1753.61	11.6019	1749.99	11.5455	1758.72	12.5714	1768.2	12.7619	1781.51	54.3036	1774.18	10.1875	1743.18	10.975	1737.09	10.725	1762.17	17.4167	1715.73	9.07143	1682.99	10.3125	1730.94	9.75	1727.6	8.41667	1744.5	12.0375
1821.16	10.3131	1789.7	15.0057	1763.87	15.6875	1769.75	11.45	1755.45	9.73148	1751.84	10.1818	1760.57	13.5	1770.05	13.1429	1783.35	54.1161	1776.02	11.6875	1745.03	11.125	1738.94	11.5	1764.02	14.4167	1717.59	9	1684.85	13.6375	1732.79	8.32143	1729.45	9.70833	1746.35	10.4
1822.99	10.3252	1791.54	15.0862	1765.72	9.0625	1771.59	9.725	1757.3	10.5	1753.68	11.0341	1762.41	12.2857	1771.89	14.6429	1785.19	51.5446	1777.87	11.9286	1746.88	13.525	1740.79	9	1765.86	12.1667	1719.44	10.7857	1686.71	10.675	1734.65	10.0536	1731.3	11.5625	1748.19	7.8125
1824.82	10.4316	1793.38	14.4828	1767.56	13.25	1773.43	10.7	1759.14	10.6296	1755.53	11.6023	1764.26	10.8571	1773.73	12.7143	1787.03	52.3839	1779.71	11.8036	1748.73	11.1	1742.64	9.225	1767.71	15.25	1721.3	10.2857	1688.57	11.7125	1736.5	10.3214	1733.15	9.02083	1750.04	10.725
1826.65	10.9149	1795.21	15.3448	1769.41	16.125	1775.27	9.95	1760.99	10.8333	1757.38	11.8068	1766.1	15.3095	1775.57	14.8095	1788.87	53.4196	1781.55	11.2143	1750.58	10.65	1744.49	10.725	1769.55	13.5833	1723.15	7.85714	1690.44	9.9625	1738.35	10.9643	1735	10.0417	1751.89	9.3125
1828.48	10.2644	1797.05	14.523	1771.25	13.125	1777.12	12.9	1762.84	10.3241	1759.22	13.4205	1767.94	11.5714	1777.42	12.4524	1790.71	52.9196	1783.39	11.1607	1752.42	9.1	1746.33	8.75	1771.39	13.6667	1725	14.4286	1692.3	11.3	1740.2	10.3571	1736.86	8.8125	1753.74	9.525
1830.31	10.5562	1798.89	15.8046	1773.09	11.625	1778.96	10.6	1764.68	11.3704	1761.07	10.8068	1769.79	13.5238	1779.26	13.5952	1792.55	52.5	1785.23	11.7679	1754.27	9.625	1748.18	10.875	1773.23	18.4167	1726.86	13.5714	1694.16	10.375	1742.05	9.51786	1738.71	10.625	1755.58	9.2125
1832.14	11.0881	1800.72	14.3908	1774.93	11.5625	1780.8	13.05	1766.52	10.4167	1762.91	11.2727	1771.63	9.28571	1781.1	13.5238	1794.38	56.1875	1787.07	11.4107	1756.12	11.525	1750.03	6.675	1775.08	10	1728.71	13.2857	1696.02	12.1125	1743.9	9.82143	1740.56	10.125	1757.43	11.4875
1833.97	10.8359	1802.56	16.1149	1776.78	13.4375	1782.64	9.9	1768.37	11.5278	1764.76	10.8182	1773.47	11.9524	1782.94	12.7143	1796.22	54.1964	1788.91	10.1161	1757.96	9.15	1751.88	9.575	1776.92	10.5833	1730.56	11.0714	1697.88	11.175	1745.75	11.1071	1742.41	9.89583	1759.28	10.2625
1835.8	10.31	1804.4	15.6494	1778.62	11.125	1784.48	10.875	1770.21	10.3981	1766.6	9.68182	1775.31	13.1429	1784.78	14.7143	1798.06	52.6161	1790.74	10.7857	1759.81	11.675	1753.73	11.35	1778.76	14.8333	1732.42	8.35714	1699.74	10.5375	1747.59	10.1786	1744.25	9.52083	1761.12	8.4375
1837.63	10.8967	1806.23	13.9713	1780.46	12.0625	1786.32	10.55	1772.05	11.4907	1768.45	11.9205	1777.16	12.9048	1786.62	14.5	1799.89	54.3036	1792.58	11.4018	1761.66	11.675	1755.57	9.95	1780.6	10.3333	1734.27	10.2143	1701.6	9.6375	1749.44	12.8393	1746.1	8.1875	1762.97	10.3125
1839.45	10.2796	1808.07	14.6724	1782.3	15.1875	1788.16	12.95	1773.9	8.31481	1770.29	11.2159	1779	14	1788.46	14.5476	1801.73	54.1786	1794.42	11.2232	1763.5	12.625	1757.42	10	1782.44	14.8333	1736.12	11.4286	1703.46	11.6	1751.29	10.4464	1747.95	10.0625	1764.81	11.35
1841.28	11.7204	1809.9	16.0402	1784.14	13.6875	1790	10.075	1775.74	8.84259	1772.13	11.5227	1780.84	11.6905	1790.29	13.381	1803.56	54.1161	1796.26	10.8036	1765.34	12.425	1759.26	9.35	1784.28	16.0833	1737.97	8	1705.31	12.4875	1753.14	9.64286	1749.8	10.2083	1766.65	7.825
1843.11	11.9818	1811.73	13.8506	1785.98	14.1875	1791.83	14.125	1777.58	10.1574	1773.97	12.5	1782.68	12.6667	1792.13	13.1667	1805.4	53.2232	1798.09	10.9018	1767.19	9.425	1761.11	10.425	1786.12	11.25	1739.82	8.28571	1707.17	10.8	1754.98	9.57143	1751.65	9.02083	1768.5	11.225
1844.93	11.3769	1813.57	15.3793	1787.82	8.3125	1793.67	10.875	1779.42	11.8704	1775.82	10.7841	1784.52	11.7143	1793.97	15.119	1807.23	52.9821	1799.93	11.3304	1769.03	10.825	1762.95	12.075	1787.96	11.3333	1741.67	10.5714	1709.03	8.825	1756.83	9.85714	1753.49	11.5833	1770.34	10.35
1846.76	11.0091	1815.4	15.2759	1789.66	12.5	1795.51	10.2	1781.26	8.89815	1777.66	12.1136	1786.36	9.83333	1795.81	12.4286	1809.07	53.1696	1801.77	12.3393	1770.88	8.875	1764.8	9.55	1789.8	13.0833	1743.52	14.5714	1710.89	11.1375	1758.68	8.69643	1755.34	11.3333	1772.18	8.9
1848.58	11.9544	1817.23	15.6552	1791.49	12.6875	1797.35	10.55	1783.1	10.9537	1779.5	11.1705	1788.2	13.7381	1797.64	11.9048	1810.9	52.7679	1803.6	11.1071	1772.72	11.9	1766.64	9.55	1791.64	16.1667	1745.37	12.7143	1712.74	9.9625	1760.52	8.64286	1757.19	10.0833	1774.03	10.5375
1850.41	11.3617	1819.06	14.4195	1793.33	15.1875	1799.18	11.3	1784.94	8.59259	1781.34	12.3636	1790.04	13.7857	1799.48	13.381	1812.74	55.75	1805.44	11.8661	1774.56	12.925	1768.49	10.225	1793.48	11.6667	1747.22	9.71429	1714.6	12.6375	1762.37	9.73214	1759.03	9.02083	1775.87	10.775
1852.23	12.2036	1820.89	14.2701	1795.17	11	1801.02	11.975	1786.78	9.9537	1783.18	11.1023	1791.87	13.6905	1801.32	14.7381	1814.57	54.125	1807.27	11.3482	1776.4	10.2	1770.33	8.35	1795.31	12.5833	1749.06	16.9286	1716.45	11.7125	1764.21	9.58929	1760.88	9.85417	1777.71	9.2625
1854.06	12.3982	1822.73	15.5632	1797.01	11.9375	1802.85	12.125	1788.62	10.6019	1785.02	11.5568	1793.71	14.0476	1803.15	12.4524	1816.4	52.8571	1809.11	10.8661	1778.24	9.175	1772.17	9.75	1797.15	11.0833	1750.91	12.1429	1718.31	11.6625	1766.05	10.5893	1762.72	8.9375	1779.55	7.6
1855.88	13.6413	1824.56	16.9598	1798.84	10.5	1804.69	10.425	1790.46	11.4722	1786.86	9.46591	1795.55	12.9762	1804.99	13.0714	1818.23	55.5893	1810.94	11.0714	1780.08	12.25	1774.01	12.35	1798.99	12	1752.76	11.5	1720.16	9.725	1767.9	9.14286	1764.57	9.1875	1781.39	11.3125
1857.7	12.7629	1826.39	14.9885	1800.68	15.3125	1806.52	11.85	1792.3	9.39815	1788.7	10.9886	1797.39	12.7143	1806.82	14.3095	1820.07	53.6071	1812.77	11.8036	1781.92	9.575	1775.86	9.7	1800.82	13.75	1754.61	11.2857	1722.02	12.925	1769.74	8.94643	1766.41	11.1458	1783.23	12.7875
1859.53	13.8207	1828.22	15.1839	1802.52	9.875	1808.36	12.025	1794.14	10.4815	1790.54	14.0114	1799.22	10.9762	1808.66	12.6429	1821.9	53.6518	1814.61	11.6518	1783.76	9.325	1777.7	8.475	1802.66	14.4167	1756.45	11	1723.87	10.2375	1771.58	9.17857	1768.26	8.95833	1785.07	8.6375
1861.35	13.2249	1830.05	13.8621	1804.35	11.625	1810.19	12.75	1795.97	10.963	1792.37	10.8182	1801.06	11.5714	1810.49	14.6667	1823.73	53.6875	1816.44	11.7321	1785.6	11.475	1779.54	8.475	1804.49	7.58333	1758.3	10.6429	1725.73	11.9625	1773.43	8.92857	1770.1	10.6458	1786.91	9.2
1863.17	12.5684	1831.88	15.8046	1806.19	12.5625	1812.03	7.9	1797.81	10.3519	1794.21	12.6932	1802.89	13.119	1812.32	11.9048	1825.56	55.2054	1818.27	11.3214	1787.44	10.125	1781.38	10.05	1806.33	8.66667	1760.14	11.5714	1727.58	11.3625	1775.27	9.55357	1771.94	12	1788.75	10.1375
1864.99	12.3921	1833.7	16	1808.02	12.625	1813.86	9.45	1799.65	8.37963	1796.05	11.3523	1804.73	11.4524	1814.16	13.3095	1827.39	54.5893	1820.1	10.3214	1789.28	8.775	1783.22	10.2	1808.16	11.6667	1761.99	8.57143	1729.43	11.1125	1777.11	9.35714	1773.78	9.35417	1790.59	10.35
1866.81	12.7234	1835.53	15.3908	1809.86	10.5	1815.69	11.35	1801.48	9.40741	1797.89	10.6705	1806.56	12.9762	1815.99	14.7619	1829.22	54.9196	1821.93	9.39286	1791.12	10.975	1785.06	10.675	1810	8.33333	1763.83	11.9286	1731.28	10.8125	1778.95	10.5714	1775.63	11.6875	1792.43	8.9
1868.63	11.8693	1837.36	17.3448	1811.69	13	1817.53	9.975	1803.32	11.5093	1799.72	11.8068	1808.4	12.4286	1817.82	15.0714	1831.05	55.0982	1823.76	11.5357	1792.96	8.55	1786.9	10.1	1811.83	13.5	1765.68	12.7143	1733.14	11.275	1780.79	9.60714	1777.47	11.7083	1794.26	10.6625
1870.45	11.9726	1839.19	16.092	1813.52	10.4375	1819.36	9.65	1805.15	10.5741	1801.56	10.2955	1810.23	10.381	1819.65	11.7619	1832.88	55.8214	1825.59	9.52679	1794.8	7.975	1788.74	8.475	1813.66	13.3333	1767.52	11.6429	1734.99	12.8625	1782.63	9.41071	1779.31	11.2083	1796.1	9.1125
1872.27	11.0243	1841.01	15.6552	1815.36	8.1875	1821.19	12.8	1806.99	10.6389	1803.39	10.6136	1812.07	12.2381	1821.48	14.9524	1834.7	53.3125	1827.42	11.1339	1796.63	10.05	1790.58	7.95	1815.5	7.75	1769.36	14.2143	1736.84	11.6875	1784.47	9.39286	1781.15	10.5417	1797.94	9.975
1874.09	11.0669	1842.84	17.5	1817.19	9.875	1823.02	12.975	1808.82	13.0648	1805.23	10.3295	1813.9	13.5714	1823.32	14.619	1836.53	53.3214	1829.25	11.2589	1798.47	10.025	1792.41	12.975	1817.33	14.4167	1771.21	10.5714	1738.69	9.075	1786.31	9.91071	1782.99	11.8958	1799.78	10.075
1875.91	11.0851	1844.67	16.4253	1819.02	10.5625	1824.85	13.475	1810.66	8.88889	1807.06	11.3068	1815.73	12.6905	1825.15	13	1838.36	55.6964	1831.08	11.1875	1800.31	10.3	1794.25	7.6	1819.16	12.9167	1773.05	16.2857	1740.54	12	1788.15	11.1071	1784.83	11.125	1801.61	9.875
1877.73	11.7933	1846.49	15.431	1820.85	14.125	1826.68	10.4	1812.49	10.0926	1808.9	11.9545	1817.56	13.3571	1826.98	13.1429	1840.19	54.5357	1832.91	11.4286	1802.14	9.95	1796.09	9.95	1820.99	12	1774.89	11.4286	1742.39	11.1375	1789.99	9.625	1786.67	9.27083	1803.45	7.0875
1879.55	11.3009	1848.32	15.7586	1822.68	8.3125	1828.51	11.225	1814.32	10.1667	1810.73	11.0795	1819.4	12.6429	1828.81	13.4762	1842.01	55.3839	1834.74	10.5982	1803.98	10.125	1797.93	11.05	1822.82	16.0833	1776.73	9.5	1744.24	11.9	1791.83	9.78571	1788.51	9.9375	1805.28	8.175
1881.37	11.8085	1850.14	15.5517	1824.51	11.375	1830.34	10.35	1816.16	11.7315	1812.57	11.8409	1821.23	13	1830.64	15.5714	1843.84	54.7857	1836.57	11.1607	1805.81	9.175	1799.76	8.775	1824.65	11	1778.58	10.1429	1746.09	10.6125	1793.67	9.73214	1790.35	9.58333	1807.12	9.0375
1883.18	11.4073	1851.97	17.2816	1826.34	16.3125	1832.17	11.375	1817.99	11.4074	1814.4	10.6477	1823.06	14.5476	1832.46	14.2143	1845.67	54.5	1838.4	12.8571	1807.65	9.425	1801.6	8.625	1826.49	11.75	1780.42	15.2143	1747.94	12.85	1795.5	7.73214	1792.19	12.0625	1808.95	8.8875
1885	11.5653	1853.79	17.0747	1828.17	11.5	1834	11.7	1819.82	10.2778	1816.23	10.9886	1824.89	11.2857	1834.29	14.381	1847.49	57.4554	1840.22	11.8393	1809.48	9.025	1803.43	10.425	1828.31	11.5	1782.26	9.35714	1749.78	11.5	1797.34	9.33929	1794.02	10.5208	1810.78	7.9875
1886.82	10.4255	1855.62	16.6897	1830	14	1835.83	11.15	1821.65	11.4167	1818.06	12.2841	1826.72	11.5476	1836.12	14.381	1849.32	53.8482	1842.05	13.1161	1811.32	10.475	1805.27	9.2	1830.14	14.3333	1784.1	11.2857	1751.63	10.5875	1799.18	9.51786	1795.86	10.375	1812.62	11.2
1888.63	11.2158	1857.44	16.2586	1831.83	14	1837.65	13.975	1823.48	10.1296	1819.9	10.75	1828.55	13.0952	1837.95	17.5238	1851.14	57.1339	1843.88	12.8036	1813.15	10.875	1807.1	9.725	1831.97	16.5833	1785.94	12.3571	1753.48	11.675	1801.01	9.76786	1797.7	9.79167	1814.45	10.575
1890.45	10.4347	1859.26	15.7644	1833.66	11.0625	1839.48	12.2	1825.31	7.67593	1821.73	11.7273	1830.38	12.5714	1839.78	15.881	1852.97	57.0982	1845.7	12.5536	1814.98	10.375	1808.94	10.225	1833.8	13.75	1787.78	14.5	1755.32	10.975	1802.85	8.91071	1799.53	11.2292	1816.28	8.05
1892.26	10.6748	1861.08	17.1149	1835.49	11.8125	1841.31	10.35	1827.14	10.1296	1823.56	11.0341	1832.21	12.881	1841.6	15.7381	1854.79	55.2411	1847.53	11.5625	1816.81	9.425	1810.77	9.95	1835.63	11.6667	1789.61	9.42857	1757.17	10.425	1804.68	8.60714	1801.37	10.125	1818.12	9.0625
1894.08	10.7629	1862.91	17.6954	1837.32	13.6875	1843.13	14.675	1828.97	10.463	1825.39	10.2273	1834.04	11.2143	1843.43	16.6667	1856.61	58.6607	1849.35	12.4107	1818.65	10.9	1812.61	10.8	1837.46	16.25	1791.45	8.28571	1759.02	13.3625	1806.52	10.7857	1803.21	8	1819.95	10.1375
1895.89	11.2249	1864.73	16.7644	1839.14	15.1875	1844.96	11.775	1830.8	10.3333	1827.22	9.98864	1835.86	14.7381	1845.25	15.619	1858.44	56.3304	1851.18	11.5536	1820.48	9.8	1814.44	9.55	1839.29	14.3333	1793.29	7.64286	1760.86	11.1125	1808.35	9.46429	1805.04	9.39583	1821.78	9.875
1897.71	10.5198	1866.55	16.0402	1840.97	15.375	1846.79	14.85	1832.63	10.7963	1829.05	10.9886	1837.69	13.8095	1847.08	15.4048	1860.26	57.2321	1853	11.625	1822.31	9.725	1816.27	9.7	1841.11	14.0833	1795.13	9.42857	1762.71	12.125	1810.19	9.28571	1806.88	10.5	1823.61	8.2375
1899.52	10.8146	1868.37	17.7874	1842.8	17.1875	1848.61	12.375	1834.46	9.19444	1830.88	11.8182	1839.52	11.5238	1848.9	16.8095	1862.08	57.8571	1854.82	13.0536	1824.14	10.625	1818.1	9.675	1842.94	16.8333	1796.96	11.7857	1764.55	10.975	1812.02	10.5893	1808.71	11.0833	1825.44	10.3375
1901.33	9.94833	1870.19	15.046	1844.62	17.25	1850.44	11.75	1836.29	10.2593	1832.71	11.1705	1841.35	13.4048	1850.73	18.4524	1863.9	56.2054	1856.65	13.4464	1825.97	8.925	1819.94	7.675	1844.76	13.5	1798.8	9.07143	1766.4	13.35	1813.86	12.1786	1810.54	11.2917	1827.27	9.5125
1903.15	10.8906	1872.01	17.6609	1846.45	10.5625	1852.26	13.35	1838.12	10.6111	1834.54	10.4432	1843.17	13.8571	1852.55	19.0238	1865.72	57.5	1858.47	13.9732	1827.8	8.575	1821.77	9.975	1846.59	13.75	1800.64	8.85714	1768.24	11.35	1815.69	10.125	1812.38	8.97917	1829.1	8.8375
1904.96	10.0517	1873.83	14.3448	1848.28	15.875	1854.08	15.4	1839.94	10.2778	1836.36	13.4886	1845	12.3333	1854.38	17.381	1867.54	56.3393	1860.29	13.1161	1829.63	10.825	1823.6	7.05	1848.42	14.3333	1802.47	9.71429	1770.08	10.8125	1817.52	10.8036	1814.21	10.2917	1830.93	9.3125
1906.77	10.8541	1875.65	17.3333	1850.1	18.625	1855.91	13.775	1841.77	10.0185	1838.19	11.9205	1846.82	13.2619	1856.2	20.0238	1869.36	57.5714	1862.12	13.4643	1831.46	10.375	1825.43	9.975	1850.24	13.25	1804.31	4.64286	1771.93	10.8375	1819.35	10.375	1816.04	8.5625	1832.76	11.075
1908.58	10.3131	1877.47	16.454	1851.92	15.375	1857.73	11.75	1843.6	9.42593	1840.02	10.875	1848.65	11.9048	1858.02	18.1429	1871.18	56.0714	1863.94	14.0089	1833.29	10.9	1827.26	9.475	1852.07	17.9167	1806.14	7.92857	1773.77	11.7875	1821.18	8.35714	1817.88	8.72917	1834.59	8.9125
1910.39	11.0973	1879.28	15.6322	1853.75	17.375	1859.55	13.175	1845.42	11.2778	1841.85	11.2955	1850.47	14.2381	1859.85	19.7381	1873	56.3929	1865.76	13.1339	1835.12	10.2	1829.09	9.875	1853.89	13.6667	1807.98	8.21429	1775.61	11.1	1823.01	9.46429	1819.71	10.6458	1836.42	8.4375
1912.2	10.1854	1881.1	14.9598	1855.57	17.8125	1861.38	15.35	1847.25	12.1574	1843.67	13.0114	1852.3	16.2381	1861.67	16.119	1874.82	55.375	1867.58	12.8661	1836.94	10.575	1830.92	10.05	1855.71	12.75	1809.81	11.6429	1777.45	9.6625	1824.85	9.69643	1821.54	10.1667	1838.24	9.3125
1914.01	10.2067	1882.92	17.2759	1857.4	19.8125	1863.2	12.075	1849.07	10.1667	1845.5	11.9773	1854.12	15.0714	1863.49	17.8095	1876.64	57.7589	1869.4	12.9196	1838.77	10.85	1832.75	8.375	1857.54	13	1811.65	13.2143	1779.29	11.9375	1826.68	10.2321	1823.37	12.8542	1840.07	10.2125
1915.82	9.8693	1884.74	15.4483	1859.22	16.125	1865.02	14.5	1850.9	10.4074	1847.32	13.1818	1855.95	12.5	1865.31	16.8333	1878.46	55.9196	1871.22	13.1875	1840.6	10.675	1834.57	10.9	1859.36	15.5	1813.48	4.92857	1781.13	12.2875	1828.51	9.39286	1825.2	9.25	1841.9	9.075
1917.63	10.4134	1886.55	15.5632	1861.04	18.0625	1866.84	11.55	1852.72	13.9815	1849.15	12.2614	1857.77	16.7619	1867.13	20.8571	1880.28	56.1964	1873.04	12.5179	1842.43	11.95	1836.4	10.7	1861.18	17.0833	1815.31	7	1782.97	9.3375	1830.33	10.1071	1827.03	9.22917	1843.72	10.8
1919.44	10.2188	1888.37	14.9655	1862.86	15.4375	1868.66	13.375	1854.55	11.8241	1850.97	14.5	1859.59	16.8333	1868.95	18.2619	1882.09	56.7232	1874.86	13.2857	1844.25	10.85	1838.23	8.5	1863	14.8333	1817.14	8	1784.81	11.6	1832.16	9.76786	1828.86	11.1042	1845.55	11.45
1921.25	11.2158	1890.18	16.2356	1864.68	12.75	1870.48	12.55	1856.37	12.8148	1852.8	14.4318	1861.41	15.1429	1870.77	19.4524	1883.91	57.7768	1876.68	13.5446	1846.08	10.975	1840.06	9.9	1864.82	14.6667	1818.98	10.4286	1786.65	11.95	1833.99	9.98214	1830.69	10.5625	1847.37	8.1625
1923.06	10.845	1892	15.2011	1866.51	17	1872.3	15.425	1858.19	12.6852	1854.62	12.2727	1863.24	17.8095	1872.59	18.1429	1885.73	54.9107	1878.49	12.8571	1847.9	10.75	1841.88	10.725	1866.65	14.1667	1820.81	8.14286	1788.49	11.475	1835.82	8.05357	1832.52	10.3958	1849.2	10.3375
1924.87	10.6778	1893.81	15.0172	1868.33	15.0625	1874.12	12.5	1860.01	12.25	1856.44	12.0341	1865.06	16.3571	1874.41	17.3571	1887.54	56.9196	1880.31	11.6786	1849.73	12.525	1843.71	10.375	1868.47	12.75	1822.64	9.07143	1790.33	10.325	1837.65	9.73214	1834.35	10.6667	1851.02	11.4375
1926.68	10.8541	1895.63	14.0172	1870.15	15.125	1875.94	13.3	1861.84	12.2963	1858.27	13.8182	1866.88	15.2619	1876.23	17.2381	1889.36	56.8482	1882.13	12.8482	1851.55	10.125	1845.54	10.175	1870.29	11.4167	1824.47	7.5	1792.17	12.575	1839.48	10.0714	1836.18	11.75	1852.85	9.125
1928.48	10.5167	1897.44	14.6724	1871.97	13.125	1877.76	9.975	1863.66	12.6019	1860.09	13.9091	1868.7	14.5	1878.05	18	1891.18	56.4286	1883.95	11.2054	1853.38	11.75	1847.36	9.9	1872.11	11.9167	1826.3	9.21429	1794.01	11.3375	1841.3	11.3036	1838	11.8542	1854.67	9.65
1930.29	9.86626	1899.26	13.3793	1873.79	14.875	1879.58	13.175	1865.48	12.2685	1861.91	14.0795	1870.52	15.0476	1879.87	16.5714	1892.99	57.4821	1885.76	12.3661	1855.2	13.275	1849.19	8.475	1873.93	15.9167	1828.13	8.21429	1795.84	10.275	1843.13	10.3929	1839.83	10.0625	1856.5	11
1932.09	10.5684	1901.07	16.0575	1875.6	19.0625	1881.39	11.95	1867.3	14.213	1863.73	13.5	1872.34	14.1667	1881.68	17.8571	1894.81	55.9643	1887.58	12.5714	1857.02	10.275	1851.01	9.8	1875.74	16.4167	1829.96	8.78571	1797.68	11.275	1844.95	10.4464	1841.66	10.125	1858.32	11.7125
1933.9	10.459	1902.88	15.3563	1877.42	16.25	1883.21	11.9	1869.12	11.1667	1865.56	11.3523	1874.16	13.3571	1883.5	12.119	1896.62	54.3304	1889.4	13.1429	1858.85	10.925	1852.83	7.3	1877.56	15.3333	1831.79	9.57143	1799.52	12.925	1846.78	11.3214	1843.48	12.7917	1860.14	9.2875
1935.71	10.8875	1904.69	15.2356	1879.24	13.125	1885.03	12.9	1870.94	11.9352	1867.38	11.5227	1875.98	12.9762	1885.32	14.7381	1898.43	55.7768	1891.21	12.1786	1860.67	11.65	1854.66	10.85	1879.38	11.5	1833.62	12.7857	1801.35	10.9125	1848.61	11.9286	1845.31	9.54167	1861.96	12.5375
1937.51	10.7629	1906.51	15.6034	1881.06	20.5	1886.84	11.475	1872.76	10.5741	1869.2	13.1023	1877.79	13.7857	1887.13	16.8095	1900.25	57.1518	1893.03	13.125	1862.49	12.1	1856.48	11.775	1881.2	15.4167	1835.45	11.1429	1803.19	12.2875	1850.43	9.875	1847.14	13.875	1863.78	12.525
1939.31	10.997	1908.32	14.4943	1882.88	13	1888.66	11.025	1874.58	11.5278	1871.02	13.0909	1879.61	15.2857	1888.95	16.881	1902.06	56.8125	1894.84	11.0804	1864.31	10.475	1858.31	10.475	1883.02	15.9167	1837.27	9.35714	1805.03	9.4625	1852.25	12.9464	1848.96	12.7708	1865.61	9.1125
1941.12	10.3587	1910.13	14.7299	1884.69	14	1890.48	12.375	1876.4	11.6574	1872.84	13.9205	1881.43	14.0476	1890.77	14.2381	1903.87	54.5089	1896.65	12.1518	1866.13	10.55	1860.13	12.25	1884.83	12.4167	1839.1	9.57143	1806.86	9.625	1854.08	10.9643	1850.79	13.0417	1867.43	9.7
1942.92	10.8875	1911.94	16.1322	1886.51	12.3125	1892.29	10.95	1878.22	10.8611	1874.66	12.5682	1883.25	13.5	1892.58	15.0476	1905.68	56.6429	1898.47	10.25	1867.95	15.25	1861.95	10.175	1886.65	12.3333	1840.93	10.6429	1808.69	11.5375	1855.9	11.4286	1852.61	12.9792	1869.25	13.5875
1944.73	10.9271	1913.75	15.5287	1888.33	15.1875	1894.11	14.375	1880.04	9.9537	1876.47	13.0114	1885.06	13.4762	1894.4	15.3095	1907.5	56.3929	1900.28	11.4554	1869.77	12.9	1863.77	9.35	1888.47	15.3333	1842.75	8.28571	1810.53	12.925	1857.73	9.26786	1854.43	12.3333	1871.07	10.675
1946.53	10.9818	1915.56	16.4655	1890.14	10.8125	1895.92	11.625	1881.85	10.6574	1878.29	12.2273	1886.88	14.6429	1896.21	13.8095	1909.31	56.6964	1902.09	9.41964	1871.59	11.925	1865.59	11.925	1890.28	15.4167	1844.58	6.5	1812.36	11.7	1859.55	11.6429	1856.26	9.72917	1872.89	8.9875
1948.33	10.5745	1917.37	14.0287	1891.96	12	1897.73	11.2	1883.67	11.2685	1880.11	10.875	1888.7	15.8571	1898.02	14.9762	1911.12	55.5268	1903.91	12.4018	1873.41	12.575	1867.41	9.025	1892.1	10.25	1846.41	9.92857	1814.19	11.025	1861.37	10.5714	1858.08	13.375	1874.71	11.8875
1950.13	10.2492	1919.18	16.3391	1893.77	11	1899.55	10.1	1885.49	12.0278	1881.93	13.6932	1890.51	15.2857	1899.84	13.9286	1912.93	56.8839	1905.72	12.625	1875.23	10.775	1869.23	10.375	1893.91	16.6667	1848.23	12	1816.03	9.625	1863.19	12.2321	1859.9	10.5	1876.53	10.5625
1951.93	10.6353	1920.99	15.1897	1895.59	13.375	1901.36	10	1887.3	9.76852	1883.75	12.625	1892.33	13.3095	1901.65	12.8095	1914.74	57.2054	1907.53	11.4643	1877.05	12.35	1871.05	8.025	1895.73	12.1667	1850.06	11.5	1817.86	10.425	1865.01	10.625	1861.73	12.1875	1878.34	11.05
1953.74	10.3678	1922.8	15.0805	1897.4	12.1875	1903.17	11.575	1889.12	12.5833	1885.56	11.2273	1894.14	13.4524	1903.46	15.1905	1916.55	57.6786	1909.34	11.6607	1878.87	13.725	1872.87	8.525	1897.54	15.0833	1851.88	10.2857	1819.69	10.9	1866.83	10.1964	1863.55	12.4792	1880.16	10.0375
1955.54	10.1368	1924.6	15.0172	1899.21	16.8125	1904.99	11.85	1890.94	12.2593	1887.38	11.4318	1895.96	12.7143	1905.28	14.1667	1918.36	54.4375	1911.15	10.8304	1880.69	12.075	1874.69	11.325	1899.35	14.6667	1853.7	11.8571	1821.52	11.575	1868.65	10.4821	1865.37	13.875	1881.98	10.8875
1957.34	11.2705	1926.41	15.7931	1901.03	15.9375	1906.8	11.375	1892.75	9.57407	1889.19	11.5568	1897.77	11.7143	1907.09	13.8333	1920.17	57.75	1912.96	12.2054	1882.51	11.9	1876.51	11.35	1901.17	12.5833	1855.53	12.3571	1823.35	11.8375	1870.48	12.1964	1867.19	10.3125	1883.8	11.65
1959.14	9.35562	1928.22	15.6839	1902.84	14.25	1908.61	11.925	1894.57	9.63889	1891.01	12.2955	1899.58	13.2619	1908.9	14.9762	1921.97	57	1914.77	10.7589	1884.32	10	1878.33	10.025	1902.98	9	1857.35	11.3571	1825.18	11.1375	1872.29	12.4821	1869.01	13.5625	1885.61	9.0125
1960.94	10.1337	1930.02	16.4655	1904.65	13.0625	1910.42	10.875	1896.38	12.8148	1892.83	11.3523	1901.4	13.119	1910.71	16.619	1923.78	56.9107	1916.58	11.3214	1886.14	12.725	1880.15	11.025	1904.79	9.25	1859.17	7.21429	1827.02	9.8125	1874.11	11.4107	1870.83	11.6458	1887.43	10.15
1962.74	10.5532	1931.83	13.9483	1906.46	14.5625	1912.23	12.2	1898.19	9.2037	1894.64	11.3636	1903.21	12.4286	1912.52	11.8333	1925.59	55.6607	1918.39	12.9643	1887.96	12.925	1881.97	9.15	1906.6	12.9167	1861	14.1429	1828.84	11.8625	1875.93	11.4286	1872.65	12.2083	1889.25	9.3875
1964.53	10.5836	1933.64	16.2069	1908.28	12.4375	1914.04	11.425	1900.01	11.3056	1896.45	10.1364	1905.02	12.4524	1914.33	15.9048	1927.4	55.0357	1920.2	10.9375	1889.77	11.45	1883.78	10.125	1908.41	13.5	1862.82	10.2143	1830.67	11.5125	1877.75	9.03571	1874.47	11.0625	1891.06	8.5
1966.33	9.8693	1935.44	14.9713	1910.09	16.125	1915.85	12.475	1901.82	9.71296	1898.27	12.8977	1906.83	13.6429	1916.14	15.0952	1929.2	55.3393	1922.01	11.3125	1891.59	12.925	1885.6	10.075	1910.23	11.9167	1864.64	7.14286	1832.5	10.3625	1879.57	10.1607	1876.29	11.9583	1892.88	9.825
1968.13	11.6687	1937.25	13.8621	1911.9	15.8125	1917.66	13.3	1903.63	9.89815	1900.08	12.8523	1908.65	13.0476	1917.95	17.3333	1931.01	57.0893	1923.82	11.0714	1893.4	13.375	1887.42	9.025	1912.04	9	1866.46	10.9286	1834.33	10.9625	1881.39	11.0536	1878.11	11.2708	1894.69	10.075
1969.93	11.0274	1939.05	15.2874	1913.71	10.1875	1919.47	11.725	1905.44	11.0926	1901.89	11.3182	1910.46	14.6429	1919.76	11.881	1932.82	57.0179	1925.62	13.4911	1895.22	11.2	1889.23	9.625	1913.85	13.9167	1868.28	10.0714	1836.16	11.4875	1883.2	12.7679	1879.92	10.7917	1896.5	10.1875
1971.72	11.7234	1940.85	14.2931	1915.52	14.1875	1921.28	13.3	1907.26	13.1019	1903.71	13.1591	1912.27	15.7857	1921.57	14.881	1934.62	57.2232	1927.43	11.8036	1897.03	14.05	1891.05	8.175	1915.66	13.4167	1870.1	11.3571	1837.99	12.275	1885.02	8.89286	1881.74	11.4583	1898.32	8.3375
1973.52	11.5532	1942.66	15.7529	1917.33	16.5625	1923.09	11.725	1909.07	10.0926	1905.52	12.7727	1914.08	11.5476	1923.37	14.5714	1936.43	55.6429	1929.24	11.2321	1898.84	12.825	1892.86	8.175	1917.47	12.3333	1871.92	8.5	1839.81	12.3125	1886.84	11.2679	1883.56	9.97917	1900.13	10.35
1975.32	11.6109	1944.46	16.977	1919.14	14	1924.89	10.2	1910.88	10.4907	1907.33	10.6705	1915.89	15.8571	1925.18	13.3095	1938.23	56.4107	1931.04	10.6429	1900.66	12.3	1894.68	11.275	1919.28	12.9167	1873.74	7.92857	1841.64	12.05	1888.65	10.8036	1885.38	11.4167	1901.94	8.575
1977.11	10.7842	1946.26	15.2184	1920.95	13.8125	1926.7	10.25	1912.69	10.7037	1909.14	10.9886	1917.7	14.5476	1926.99	15.5238	1940.04	57.2054	1932.85	11.0536	1902.47	10	1896.49	10.4	1921.08	9.25	1875.56	8.57143	1843.47	13.2	1890.47	11.0714	1887.19	11	1903.76	7.3375
1978.91	11.5319	1948.07	15.908	1922.75	13.4375	1928.51	11.9	1914.5	11.3796	1910.95	11.7273	1919.5	11.5238	1928.8	14.6905	1941.84	55.9196	1934.66	10.8571	1904.28	12.625	1898.3	12.775	1922.89	17.1667	1877.38	9.42857	1845.29	11.15	1892.28	10.7857	1889.01	10.75	1905.57	8.8
1980.7	11.5258	1949.87	15	1924.56	15.4375	1930.31	11.875	1916.31	9.87037	1912.76	13.1818	1921.31	14.4524	1930.6	13.1905	1943.64	58.6875	1936.46	11.5982	1906.09	9.825	1900.12	10.025	1924.7	15.75	1879.2	5.21429	1847.12	11.8875	1894.1	10.5357	1890.82	10.2708	1907.38	11.25
1982.5	12.6109	1951.67	15.9368	1926.37	9.125	1932.12	12.7	1918.12	10	1914.57	11.2955	1923.12	12.8571	1932.41	17.4524	1945.45	56.6161	1938.27	11.125	1907.91	9.85	1901.93	9.25	1926.51	12.75	1881.01	8.64286	1848.94	13.175	1895.91	11.0179	1892.64	9.75	1909.19	9.1625
1984.29	11.5289	1953.47	14.8276	1928.18	11.375	1933.93	12.625	1919.93	11.1389	1916.38	12.4318	1924.93	11.4048	1934.21	12.8571	1947.25	55.0446	1940.07	11.2857	1909.72	11.45	1903.74	11.05	1928.31	14.5833	1882.83	8.28571	1850.77	12.5	1897.73	8.125	1894.45	11.1667	1911	9.5
1986.09	11.9544	1955.27	14.6494	1929.98	15.375	1935.73	12.375	1921.74	10.7222	1918.19	10.1818	1926.74	12.381	1936.02	15.2381	1949.05	56.8661	1941.87	9.14286	1911.53	11.7	1905.56	9.125	1930.12	14.6667	1884.65	12.5	1852.59	13.025	1899.54	10.8393	1896.27	10.3958	1912.81	10.5875
1987.88	11.1763	1957.07	14.6552	1931.79	15	1937.54	10.025	1923.54	10.3981	1920	11.4091	1928.54	12.2381	1937.82	13.0476	1950.85	56.1964	1943.68	10.5536	1913.34	10.25	1907.37	7.1	1931.93	8.25	1886.47	11.0714	1854.42	13.3625	1901.35	10.1964	1898.08	11.6667	1914.62	9.9375
1989.67	11.4316	1958.87	16.2931	1933.59	11.5625	1939.34	10.95	1925.35	10.5093	1921.81	12.7614	1930.35	11.8095	1939.63	13.2619	1952.65	56.7054	1945.48	12.5625	1915.15	9.35	1909.18	11.375	1933.73	14.0833	1888.28	6.42857	1856.24	12.15	1903.17	11.3929	1899.9	12.5833	1916.43	7.3
1991.47	11.3739	1960.67	14.5115	1935.4	12.375	1941.14	14.4	1927.16	11.4444	1923.62	12.4318	1932.16	12.7381	1941.43	14.4286	1954.45	53.0982	1947.28	11.2054	1916.96	11.75	1910.99	7.975	1935.54	13.0833	1890.1	8.78571	1858.06	12.3375	1904.98	10.5536	1901.71	12.7708	1918.24	11.125
1993.26	12.1702	1962.47	16.023	1937.2	16.3125	1942.95	12.675	1928.97	10.5741	1925.43	12.0795	1933.96	13.0952	1943.23	12.0952	1956.25	58.3214	1949.08	12.0625	1918.77	12.225	1912.8	10.95	1937.34	16.4167	1891.91	8.85714	1859.89	13.3	1906.79	11.6429	1903.52	9.5625	1920.05	9.75
1995.05	11.4286	1964.27	16.0115	1939.01	10.8125	1944.75	11.275	1930.77	9.44444	1927.23	11.1364	1935.77	11.1429	1945.04	13.8571	1958.05	54.0714	1950.89	10.8839	1920.58	10.7	1914.61	9.175	1939.15	11.1667	1893.73	8.71429	1861.71	12.575	1908.6	10.3571	1905.33	10.4375	1921.86	8.6375
1996.84	12.4316	1966.07	15.092	1940.81	10.375	1946.55	9.975	1932.58	12.25	1929.04	11.9432	1937.57	11.0952	1946.84	15.6429	1959.85	57.0179	1952.69	10.75	1922.38	10.825	1916.42	9.8	1940.95	12.1667	1895.54	8.85714	1863.53	12.4	1910.41	9.92857	1907.14	10.1042	1923.67	8.375
1998.63	10.7143	1967.87	15.3678	1942.62	14.625	1948.36	11.825	1934.38	10.2963	1930.85	11.9091	1939.38	12.6905	1948.64	13.5952	1961.65	58.2589	1954.49	12.7054	1924.19	9.225	1918.23	10.05	1942.75	14.4167	1897.36	10.2857	1865.35	12.9375	1912.22	10.4643	1908.96	11.0833	1925.48	11.125
2000.42	11.9909	1969.66	14.3218	1944.42	14	1950.16	12.7	1936.19	11.5093	1932.65	9.98864	1941.18	12.5238	1950.44	11.4762	1963.45	58.4464	1956.29	10.1964	1926	8.95	1920.04	12.8	1944.56	12.75	1899.17	9.42857	1867.17	14.4125	1914.03	9.26786	1910.77	12.2083	1927.28	8.8125
2002.21	11.6748	1971.46	15.5	1946.22	14.125	1951.96	13.25	1937.99	8.81481	1934.46	11.8636	1942.98	10.6905	1952.25	10.8095	1965.25	55.9732	1958.09	10.2054	1927.81	10.725	1921.85	9.525	1946.36	12.75	1900.98	6	1868.99	12.125	1915.84	9.08929	1912.58	11.5417	1929.09	9.15
2004	12.1216	1973.26	16.2701	1948.03	14.0625	1953.76	11.475	1939.8	10.7778	1936.26	10.9773	1944.79	10.9286	1954.05	12.619	1967.05	55.9196	1959.89	10.875	1929.61	11.575	1923.65	10.7	1948.16	8.08333	1902.8	7.07143	1870.81	12.8	1917.65	11.0357	1914.39	9.97917	1930.9	10.7375
2005.79	10.5927	1975.05	15.977	1949.83	9.3125	1955.56	11.85	1941.6	8.77778	1938.07	11.3295	1946.59	15.0238	1955.85	16.3095	1968.85	54.9464	1961.69	11.3393	1931.42	10.9	1925.46	9.325	1949.97	11.6667	1904.61	9.42857	1872.63	14.825	1919.46	10.75	1916.2	10.125	1932.7	9.8625
2007.58	12.1915	1976.85	17.1667	1951.63	12.3125	1957.36	9.2	1943.41	11.1759	1939.87	11.0227	1948.39	15.5238	1957.65	14.1429	1970.64	57.4018	1963.49	9.92857	1933.22	10.225	1927.27	8.575	1951.77	14.0833	1906.42	12.2857	1874.45	12.475	1921.27	10.6964	1918.01	12.0208	1934.51	8.45
2009.37	11.7933	1978.65	16.0977	1953.43	9.9375	1959.16	13.925	1945.21	9.73148	1941.68	10.9318	1950.19	12.3095	1959.45	11.5476	1972.44	58.0446	1965.28	11.7589	1935.03	10.975	1929.07	7.95	1953.57	14.9167	1908.23	8.07143	1876.27	12.4875	1923.08	10.5	1919.82	10.2083	1936.31	9.725
2011.16	11.5562	1980.44	15.7069	1955.23	13.1875	1960.96	12.525	1947.01	10.1759	1943.48	11.6364	1951.99	12.4524	1961.25	15.381	1974.24	58.4554	1967.08	12.0893	1936.84	11.425	1930.88	7.675	1955.37	17.8333	1910.04	8.85714	1878.09	12.675	1924.89	11.6964	1921.62	10.8958	1938.12	10.825
2012.94	11.2948	1982.23	14.6207	1957.03	12.75	1962.76	10.6	1948.81	10.5278	1945.28	11.9545	1953.8	9.54762	1963.05	14.2857	1976.03	56.4375	1968.88	11.5625	1938.64	8.925	1932.69	10.5	1957.17	11.1667	1911.85	10.2143	1879.91	13.1375	1926.69	9.125	1923.43	12.0833	1939.92	8.7875
2014.73	10.7325	1984.03	15.6149	1958.83	12.1875	1964.56	14.05	1950.62	12.2037	1947.08	10.6932	1955.6	13.2619	1964.84	14.8571	1977.83	58.3661	1970.68	10.8661	1940.44	9.625	1934.49	10.2	1958.97	10.5	1913.66	15.7143	1881.73	11.4625	1928.5	10.4821	1925.24	8.33333	1941.72	7.2375
2016.52	10.5258	1985.82	16.9195	1960.63	16.5625	1966.36	11.5	1952.42	10.2685	1948.89	12.7386	1957.4	12.7857	1966.64	16.3095	1979.62	58.2768	1972.47	10.3304	1942.25	10.025	1936.3	8.35	1960.77	12.8333	1915.47	14.5	1883.54	10.7	1930.31	9.17857	1927.05	10.0625	1943.53	11.4
2018.3	11.0426	1987.62	17.2299	1962.43	12.375	1968.15	12.6	1954.22	10.3241	1950.69	10.375	1959.2	12.881	1968.44	15.381	1981.42	57.0268	1974.27	11.3839	1944.05	10.775	1938.1	8.8	1962.57	14.25	1917.28	11.5714	1885.36	11.425	1932.11	9.28571	1928.85	8.35417	1945.33	9.675
2020.09	11.3313	1989.41	15.5747	1964.23	11.875	1969.95	12.425	1956.02	10.4352	1952.49	11.4205	1961	12.0238	1970.24	15.5952	1983.21	58.9286	1976.07	12.9464	1945.85	9.675	1939.91	9.675	1964.37	11.5833	1919.09	10.5	1887.18	12.35	1933.92	9.83929	1930.66	10.1875	1947.13	7.0375
2021.88	10.8389	1991.2	16.4425	1966.03	14.375	1971.75	13.35	1957.82	11.3889	1954.29	10.5795	1962.79	13.7143	1972.03	15.4286	1985.01	58.7768	1977.86	11.3125	1947.66	11.85	1941.71	11.925	1966.16	15.5	1920.9	11.3571	1888.99	11.95	1935.72	9.08929	1932.47	13.0208	1948.94	9.4875
2023.66	10.9787	1992.99	16.0747	1967.83	11.375	1973.55	10.65	1959.62	9.91667	1956.09	13.1136	1964.59	15.5476	1973.83	16.9524	1986.8	58.9554	1979.66	12.7143	1949.46	10	1943.51	8.825	1967.96	13.3333	1922.71	8.71429	1890.81	12.1	1937.53	9.07143	1934.27	11.3125	1950.74	9.4625
2025.45	10.8055	1994.79	15.6667	1969.62	17.4375	1975.34	11.5	1961.42	10.787	1957.89	9.26136	1966.39	14.119	1975.63	18.5238	1988.59	59.7411	1981.45	12.1964	1951.26	7.725	1945.32	10.075	1969.76	14.6667	1924.52	8.07143	1892.62	12	1939.33	11.8036	1936.08	10.4583	1952.54	8.9625
2027.23	9.95137	1996.58	16.1724	1971.42	12.75	1977.14	13.225	1963.22	10.3148	1959.69	12.2386	1968.19	12.7381	1977.42	16.7857	1990.39	56.6786	1983.25	12.9732	1953.06	10.2	1947.12	11.15	1971.56	12.6667	1926.32	10.4286	1894.44	11.6875	1941.14	9.32143	1937.88	8.83333	1954.34	9.575
2029.01	10.5684	1998.37	16.5345	1973.22	16.3125	1978.93	12.75	1965.02	10.463	1961.49	12.2841	1969.99	14.1905	1979.22	18.119	1992.18	61.8036	1985.04	10.1339	1954.86	13.175	1948.92	10.225	1973.35	10.75	1928.13	9.5	1896.25	12.1375	1942.94	9.875	1939.69	10.4375	1956.14	10.1375
2030.8	10.5046	2000.16	16.3276	1975.01	16.375	1980.73	9.85	1966.81	9.94444	1963.29	11.2045	1971.78	13.8333	1981.01	15.4762	1993.97	59.1964	1986.83	9.70536	1956.66	9.95	1950.72	9.225	1975.15	11.9167	1929.94	9.92857	1898.07	13.0625	1944.74	9.78571	1941.49	12.1875	1957.94	11.9
2032.58	11.4286	2001.95	17.8391	1976.81	17.0625	1982.52	12.1	1968.61	10.8056	1965.09	10.7386	1973.58	11.9286	1982.81	16.0714	1995.76	56.6607	1988.63	11.9375	1958.46	10.85	1952.52	10.775	1976.95	16.5833	1931.74	8.35714	1899.88	12.2	1946.55	9.28571	1943.29	11	1959.74	9.25
2034.36	10.5562	2003.74	14.3046	1978.6	17.5	1984.32	13.575	1970.41	12.2963	1966.89	11.1591	1975.38	11.6905	1984.6	19.8095	1997.55	57.5893	1990.42	12.0089	1960.26	10.725	1954.33	5.675	1978.74	13.8333	1933.55	9.64286	1901.69	10.775	1948.35	8.76786	1945.1	12.2083	1961.54	10.4625
2036.15	10.4407	2005.53	16.0115	1980.4	17.8125	1986.11	11.675	1972.21	11.6481	1968.68	11.6591	1977.17	14.4524	1986.39	17.1429	1999.34	58.8214	1992.21	11.4911	1962.06	11.025	1956.13	10.4	1980.54	14.25	1935.35	9.28571	1903.5	11.4125	1950.15	9.82143	1946.9	11.5208	1963.34	10.2625
2037.93	10.459	2007.32	16.2299	1982.19	15.8125	1987.9	11.475	1974	10.3611	1970.48	12.5114	1978.97	13.2143	1988.19	15.9286	2001.13	59.6161	1994	12.2232	1963.86	10.55	1957.93	9.025	1982.33	17.9167	1937.16	10.9286	1905.32	12.25	1951.95	8.17857	1948.7	12.125	1965.14	9.1125
2039.71	11.1915	2009.1	16.3276	1983.99	16.375	1989.7	13.075	1975.8	11.0556	1972.28	11.4318	1980.76	13.9524	1989.98	17.9524	2002.92	57.1518	1995.8	11.1161	1965.66	12.825	1959.73	10.4	1984.12	13.8333	1938.96	8.28571	1907.13	11.975	1953.75	9.39286	1950.5	10.7708	1966.94	10.6375
2041.49	9.89058	2010.89	16.0805	1985.78	11.375	1991.49	12.7	1977.59	11.2685	1974.08	12.9318	1982.56	12.2857	1991.77	19.881	2004.71	57.5179	1997.59	12.1786	1967.46	11.425	1961.53	11.725	1985.92	18.1667	1940.77	10.1429	1908.94	11.45	1955.55	10.8214	1952.31	10.8333	1968.73	11.8125
2043.27	9.66261	2012.68	16.2241	1987.58	17.4375	1993.28	11.6	1979.39	11.4444	1975.87	11.6364	1984.35	16.7619	1993.56	18.5	2006.5	59.6071	1999.38	11.3125	1969.25	11.575	1963.32	10.325	1987.71	13.9167	1942.57	13.4286	1910.75	11.35	1957.35	9.19643	1954.11	10.2292	1970.53	9.225
2045.05	10.4772	2014.47	16.0575	1989.37	14.125	1995.07	13.375	1981.18	11.5093	1977.67	12.4773	1986.14	12.9762	1995.36	16.119	2008.29	59.0536	2001.17	12.1518	1971.05	10.45	1965.12	7.925	1989.51	11.5833	1944.37	6.85714	1912.56	11.575	1959.15	9.125	1955.91	8.6875	1972.33	9
2046.83	9.97872	2016.25	15.7069	1991.16	18.9375	1996.86	11.8	1982.98	11.6019	1979.46	11.8523	1987.94	15.619	1997.15	18.5476	2010.08	58.0804	2002.96	12.2411	1972.85	12.625	1966.92	10.075	1991.3	17.1667	1946.18	7.28571	1914.37	10.075	1960.95	8.92857	1957.71	6.75	1974.12	10.55
2048.61	11.0395	2018.04	14.5575	1992.95	13.375	1998.66	14.875	1984.77	10.6852	1981.26	12.1591	1989.73	15.4762	1998.94	18.619	2011.87	59.6071	2004.75	12.8661	1974.64	12.275	1968.72	8.3	1993.09	16.5833	1947.98	10.5	1916.18	12.625	1962.75	10.6786	1959.51	8.3125	1975.92	12.5
2050.39	11.3343	2019.83	16.0575	1994.75	14.875	2000.45	12.375	1986.57	10.9444	1983.05	11.9545	1991.52	16.2143	2000.73	19	2013.65	59.9911	2006.54	11.0804	1976.44	12.975	1970.52	9.925	1994.88	14.0833	1949.78	16.1429	1917.99	11.5375	1964.55	8.71429	1961.31	9.52083	1977.72	8.75
2052.17	10.1733	2021.61	15.3448	1996.54	13.125	2002.24	12.825	1988.36	10.3148	1984.85	11.6477	1993.32	13.5952	2002.52	16.7381	2015.44	57.3304	2008.32	11.8482	1978.24	12.8	1972.31	11.9	1996.67	13.5833	1951.58	8.5	1919.8	11.75	1966.35	8.25	1963.11	11.25	1979.51	11.7
2053.95	10.4195	2023.4	14.4828	1998.33	17.875	2004.03	11.775	1990.15	9.94444	1986.64	13.0682	1995.11	15.1429	2004.31	17.2143	2017.23	59.2232	2010.11	10.7768	1980.03	9.8	1974.11	8.425	1998.46	13.8333	1953.38	8.28571	1921.61	11.15	1968.15	11.875	1964.9	9.89583	1981.31	11.525
2055.73	10.1155	2025.18	16.6724	2000.12	18.6875	2005.81	11.95	1991.95	11.3519	1988.43	13.5227	1996.9	12.9524	2006.1	17.881	2019.01	57.9107	2011.9	13.0357	1981.83	10.15	1975.91	11.95	2000.25	17.6667	1955.19	10.9286	1923.42	11.55	1969.95	9.16071	1966.7	11.5833	1983.1	10.2375
2057.5	9.99088	2026.97	15.0977	2001.91	13.25	2007.6	13.25	1993.74	12.3056	1990.23	11.6364	1998.69	14.0238	2007.89	17.5476	2020.8	57.6429	2013.69	11.1786	1983.62	11.95	1977.7	10.55	2002.04	14.9167	1956.99	13.7857	1925.22	10.9375	1971.74	10.2679	1968.5	11.5208	1984.89	9.5125
2059.28	9.71429	2028.75	15.8851	2003.7	14.8125	2009.39	11.95	1995.53	11.0185	1992.02	12.7955	2000.48	12.7381	2009.67	17.9286	2022.59	58.4821	2015.47	12.7054	1985.41	12.15	1979.5	10.275	2003.83	13.5833	1958.79	6.57143	1927.03	10.7	1973.54	12.0179	1970.3	10.4375	1986.69	12.4
2061.06	9.53191	2030.54	16.0345	2005.49	14.9375	2011.18	11.975	1997.32	10.2037	1993.81	11.4886	2002.27	12.9048	2011.46	17.5476	2024.37	59.2321	2017.26	11.5357	1987.21	12.15	1981.29	10.725	2005.62	13.4167	1960.59	7.57143	1928.84	11.7125	1975.33	9.53571	1972.09	10.2292	1988.48	10.625
2062.83	10.465	2032.32	15.0345	2007.28	13.25	2012.97	12.075	1999.11	12.2778	1995.6	12.0341	2004.06	12.8095	2013.25	17.9286	2026.16	58.2679	2019.05	13.5893	1989	13.775	1983.09	9.175	2007.41	13.9167	1962.38	6.57143	1930.64	11.75	1977.13	10.8929	1973.89	10.2292	1990.27	10
2064.61	10.4468	2034.1	15.3966	2009.06	13.375	2014.76	11.875	2000.9	11.713	1997.39	13.7045	2005.85	14.119	2015.04	15.9048	2027.94	58.2589	2020.83	11.6071	1990.79	12.975	1984.88	10.325	2009.2	22.3333	1964.18	12.5714	1932.45	10.25	1978.93	12.5536	1975.69	11.125	1992.07	11.6
2066.38	9.91489	2035.88	14.908	2010.85	13.625	2016.54	12.25	2002.69	9.14815	1999.18	13.875	2007.64	14.4762	2016.82	13.7857	2029.72	59.625	2022.62	11.1964	1992.59	13.2	1986.67	8.975	2010.99	15.1667	1965.98	8.5	1934.26	12.65	1980.72	10.5893	1977.48	10.9375	1993.86	10.75
2068.16	11.1216	2037.67	15.4425	2012.64	11.3125	2018.33	12.5	2004.48	11.8704	2000.97	12.8409	2009.43	12.5952	2018.61	16.3095	2031.51	58.0446	2024.4	12.2857	1994.38	12.3	1988.47	10.275	2012.78	10.0833	1967.78	10.5714	1936.06	12.825	1982.52	11.25	1979.28	9.77083	1995.65	10.4125
2069.93	9.93313	2039.45	15.3161	2014.43	11.6875	2020.11	12	2006.27	11.8889	2002.76	13.125	2011.21	15	2020.39	12.2619	2033.29	55.9375	2026.19	12.8839	1996.17	9.9	1990.26	12.075	2014.56	12.8333	1969.58	11.6429	1937.87	10.9625	1984.31	10.9286	1981.07	11.3542	1997.44	10.9625
2071.71	10.0729	2041.23	15.977	2016.21	11.125	2021.9	14.9	2008.06	11.5278	2004.55	13.3977	2013	12.119	2022.18	16.2381	2035.07	60.9196	2027.97	10.7411	1997.96	13.55	1992.05	9.775	2016.35	16.25	1971.37	8.42857	1939.67	11.3125	1986.1	12.0893	1982.87	11.2292	1999.23	10.75
2073.48	10.2523	2043.01	14.7011	2018	11.9375	2023.69	11.575	2009.85	11.037	2006.34	12.7955	2014.79	12.3095	2023.97	15.6429	2036.85	59.2946	2029.76	10.7321	1999.75	11	1993.84	10.95	2018.14	11.75	1973.17	10.2857	1941.47	11.1	1987.9	9.875	1984.66	13.6667	2001.02	11.375
2075.26	10.2553	2044.79	16.0345	2019.79	10.625	2025.47	10.15	2011.64	9.93519	2008.13	13.3295	2016.57	14.5714	2025.75	16.2857	2038.64	58.3661	2031.54	10.6518	2001.54	13	1995.63	10.475	2019.92	16.5	1974.97	7.42857	1943.28	11.975	1989.69	9.10714	1986.46	11	2002.81	10.5875
2077.03	9.5228	2046.57	13.7644	2021.57	15.75	2027.25	11.875	2013.42	11.1944	2009.92	13.4545	2018.36	11.1667	2027.53	15.5238	2040.42	57.4732	2033.32	10.5893	2003.33	12.125	1997.43	10	2021.71	17.3333	1976.76	10.6429	1945.08	11.1125	1991.48	10.625	1988.25	12.4167	2004.6	10.625
2078.8	10.2918	2048.35	14.5287	2023.36	12.3125	2029.04	12.2	2015.21	9.53704	2011.71	11.8977	2020.15	14.4762	2029.32	15.4762	2042.2	58.7946	2035.1	11.8125	2005.12	12.175	1999.22	11.1	2023.49	10	1978.56	9.78571	1946.88	10.9125	1993.27	11.5357	1990.04	12.9167	2006.39	10.3
2080.57	10.1641	2050.13	13.9655	2025.14	12.4375	2030.82	10.6	2017	10.9167	2013.49	12.8636	2021.93	9.42857	2031.1	15.2143	2043.98	60.2321	2036.89	11.3839	2006.91	9.475	2001.01	9.075	2025.28	13.5	1980.35	10.0714	1948.69	12.0875	1995.07	10.125	1991.83	12.875	2008.18	8.55
2082.35	10.0091	2051.91	14.6034	2026.93	18.3125	2032.6	10.875	2018.78	11.3241	2015.28	11.8182	2023.72	12.1429	2032.88	14.2381	2045.76	57.4375	2038.67	11.4107	2008.7	11	2002.8	9.75	2027.06	9.83333	1982.15	10.2857	1950.49	10.625	1996.86	12.7857	1993.63	10.1667	2009.97	10.475
2084.12	9.68693	2053.69	14.5632	2028.71	11.625	2034.39	10.55	2020.57	9.06481	2017.07	12.8409	2025.5	11.6667	2034.67	13.5952	2047.54	58.1071	2040.45	10.8839	2010.49	11.975	2004.59	12.525	2028.85	14.0833	1983.94	7	1952.29	11.0625	1998.65	10.8571	1995.42	12.2083	2011.76	12.35
2085.89	9.8845	2055.46	13.3851	2030.5	11.3125	2036.17	11.475	2022.35	9.86111	2018.85	12.0568	2027.29	11.6667	2036.45	14.1905	2049.32	60.7054	2042.23	10.6518	2012.27	10.6	2006.37	10.6	2030.63	12.4167	1985.74	11.9286	1954.09	12.125	2000.44	10.0536	1997.21	11.2708	2013.54	9.4875
2087.66	10.1064	2057.24	15.431	2032.28	12.1875	2037.95	14	2024.14	9.14815	2020.64	11.5909	2029.07	10.7857	2038.23	14.4762	2051.1	57.1875	2044.01	11.3571	2014.06	8.225	2008.16	9.175	2032.41	8.33333	1987.53	7.64286	1955.89	10.4625	2002.23	11.0536	1999	10.2708	2015.33	9.7625
2089.43	9.82675	2059.02	15.6552	2034.06	11.125	2039.73	11.875	2025.92	10.4537	2022.43	11.9318	2030.85	13.3571	2040.01	14.3571	2052.88	60.1339	2045.79	10.4375	2015.85	10.525	2009.95	13.6	2034.2	8.83333	1989.32	9.92857	1957.69	9.1375	2004.02	10.8929	2000.79	10.2083	2017.12	12.2875
2091.2	9.89666	2060.79	14.8218	2035.84	16.375	2041.51	13.725	2027.71	9.77778	2024.21	11.2727	2032.64	11.4048	2041.79	15.7857	2054.65	60.7679	2047.57	11.5446	2017.63	9.5	2011.74	8.35	2035.98	12.1667	1991.11	12	1959.49	12.1125	2005.81	10.7321	2002.58	10.0833	2018.9	11.1
2092.97	10.4438	2062.57	15.6839	2037.63	9.5	2043.3	11.375	2029.49	11.1574	2026	11.4659	2034.42	14.0476	2043.57	13.1429	2056.43	59.375	2049.35	10.4821	2019.42	11.725	2013.53	9.725	2037.76	12.75	1992.91	10.2857	1961.29	12.4125	2007.6	11.5179	2004.37	10.2083	2020.69	9.7875
2094.74	9.69605	2064.35	15.4253	2039.41	13.4375	2045.08	12.725	2031.28	9.91667	2027.78	12.4318	2036.2	12.119	2045.35	13.5	2058.21	60.6071	2051.13	11.0179	2021.21	12.775	2015.31	8.95	2039.54	11.9167	1994.7	10.2857	1963.09	13.1125	2009.38	9.92857	2006.16	11.8125	2022.47	12.6
2096.51	10.1854	2066.12	17	2041.19	12.875	2046.86	12.025	2033.06	9.7963	2029.56	12.3523	2037.98	13.9762	2047.13	16.9762	2059.99	61.5089	2052.91	9.58929	2022.99	11.375	2017.1	10.5	2041.32	11.9167	1996.49	7.57143	1964.89	11.3875	2011.17	11.375	2007.95	11.1458	2024.26	10.5875
2098.27	9.39818	2067.9	14.7471	2042.97	12.0625	2048.63	10.225	2034.84	10.2037	2031.35	11.5341	2039.77	12.3095	2048.91	16.1429	2061.76	58.4286	2054.69	10.2054	2024.78	10.45	2018.89	9.95	2043.1	11.3333	1998.28	7.85714	1966.69	13.4625	2012.96	10.2321	2009.74	12.2917	2026.04	9.9625
2100.04	9.95137	2069.67	14.8563	2044.75	10.8125	2050.41	9.95	2036.62	11.6111	2033.13	11.1591	2041.55	13.2619	2050.69	14.0714	2063.54	58.8929	2056.46	10.3125	2026.56	9.6	2020.67	9.4	2044.88	11.25	2000.07	11	1968.48	11.975	2014.75	9.41071	2011.52	10.9167	2027.83	9.65
2101.81	9.58663	2071.45	15.1494	2046.53	12.8125	2052.19	10.5	2038.41	12.2222	2034.91	11.0795	2043.33	12.9762	2052.47	14.4762	2065.31	59.7054	2058.24	10.875	2028.35	11.125	2022.46	6.775	2046.66	13.5	2001.86	8.14286	1970.28	13.4125	2016.53	8.26786	2013.31	10.8333	2029.61	11.275
2103.58	10.0821	2073.22	15.6034	2048.31	12	2053.97	11.2	2040.19	9.97222	2036.7	11.4886	2045.11	11.9048	2054.25	15.4762	2067.09	61.9018	2060.02	9.89286	2030.13	9.5	2024.24	11.45	2048.44	20	2003.65	9.5	1972.08	13.55	2018.32	11.4107	2015.1	11.9167	2031.39	11.0625
2105.34	9.86322	2074.99	14.4828	2050.09	13.125	2055.75	11.75	2041.97	10.0926	2038.48	11.375	2046.89	10.9048	2056.03	15.381	2068.86	60.3214	2061.79	10.5714	2031.91	11.075	2026.03	8.925	2050.22	13.4167	2005.44	9.78571	1973.87	13.65	2020.11	9.26786	2016.88	11.125	2033.18	8.6
2107.11	10.2067	2076.77	14.8908	2051.87	10.25	2057.53	10.15	2043.75	10.6296	2040.26	11.2273	2048.67	13.2619	2057.8	14.0714	2070.64	59.125	2063.57	11.3929	2033.7	12.125	2027.81	10.825	2052	11.25	2007.23	10.4286	1975.67	12.9625	2021.89	11.3393	2018.67	10.7083	2034.96	11.325
2108.88	9.45897	2078.54	14.2759	2053.65	12.0625	2059.3	11.2	2045.53	9.73148	2042.04	11.1364	2050.45	15.2619	2059.58	14.3571	2072.41	59.6518	2065.35	10.7232	2035.48	12.975	2029.6	10.325	2053.78	8.58333	2009.02	8	1977.47	11.675	2023.68	9.75	2020.46	12.0625	2036.74	10.5375
2110.64	10.1307	2080.31	14.5862	2055.42	11.9375	2061.08	10.875	2047.31	10.8889	2043.82	12.0114	2052.22	10.2381	2061.36	15.8333	2074.19	61.0893	2067.12	10.7857	2037.26	9.05	2031.38	8.425	2055.56	13.9167	2010.81	12.3571	1979.26	12.3125	2025.46	10.125	2022.24	9.66667	2038.52	8.65
2112.41	10.1246	2082.08	13.8908	2057.2	11.3125	2062.86	9.825	2049.09	10.5833	2045.6	10.9318	2054	12.1667	2063.13	14.3571	2075.96	57.4732	2068.9	12.0268	2039.04	10.575	2033.16	10.425	2057.34	14.1667	2012.59	9.71429	1981.06	13.425	2027.25	12.3571	2024.03	11.8333	2040.31	10.9875
2114.17	10.3252	2083.86	14.7874	2058.98	12.3125	2064.63	11.5	2050.87	8.64815	2047.38	11.0682	2055.78	11.8333	2064.91	14.0476	2077.73	59.75	2070.67	10.1964	2040.82	11.375	2034.94	9.775	2059.11	17.4167	2014.38	12.3571	1982.85	13.375	2029.03	10.0357	2025.81	10.0833	2042.09	10.65
2115.94	8.79635	2085.63	15.2701	2060.76	12	2066.41	13.5	2052.65	11.0463	2049.16	10.625	2057.56	12.9524	2066.68	14.3571	2079.5	61.5446	2072.44	10.2411	2042.6	11.375	2036.73	9.6	2060.89	13.1667	2016.17	7.14286	1984.65	12.875	2030.81	9.25	2027.6	10.1875	2043.87	9.2
2117.7	9.82067	2087.4	15.7011	2062.53	12.6875	2068.18	12.25	2054.42	10.9815	2050.94	10.7386	2059.33	11.7857	2068.46	15.0714	2081.28	58.9107	2074.22	9.64286	2044.38	10.25	2038.51	12.65	2062.67	11.8333	2017.95	7.78571	1986.44	11.35	2032.6	10.2143	2029.38	9.52083	2045.65	8.825
2119.46	9.81459	2089.17	14.546	2064.31	12.125	2069.96	12.125	2056.2	9.94444	2052.72	11.5	2061.11	11.4524	2070.23	13.2857	2083.05	58.5179	2075.99	11.0714	2046.16	11.675	2040.29	7.825	2064.44	13.0833	2019.74	8.92857	1988.23	12.95	2034.38	10.1071	2031.16	9.77083	2047.43	11.275
2121.23	10.4681	2090.94	14.8851	2066.08	13.375	2071.73	10.1	2057.98	9.47222	2054.5	9.75	2062.89	13.7619	2072.01	15	2084.82	59.8571	2077.76	10.5179	2047.94	11.925	2042.07	11.525	2066.22	16.4167	2021.53	4.92857	1990.02	13.8375	2036.16	10.4821	2032.95	10.4167	2049.21	9.425
2122.99	9.34043	2092.71	14.2069	2067.86	9.875	2073.51	11.9	2059.76	9.85185	2056.27	11.2273	2064.66	12.5714	2073.78	15	2086.59	60.1875	2079.54	11.0268	2049.72	10.325	2043.85	9.325	2067.99	14.3333	2023.31	10.7143	1991.82	14.075	2037.94	8.85714	2034.73	10.4375	2050.99	10.1875
2124.75	10.3131	2094.48	15.2586	2069.63	9.625	2075.28	13.15	2061.53	10.3148	2058.05	10.6136	2066.44	11.6905	2075.56	15.7619	2088.36	59.1071	2081.31	10.8125	2051.5	13.925	2045.63	9.525	2069.77	13.1667	2025.1	8	1993.61	12.8125	2039.73	11.1429	2036.51	9.20833	2052.76	11.3125
2126.51	9.67477	2096.24	15.8851	2071.41	13.4375	2077.05	12.5	2063.31	9	2059.83	11.0341	2068.21	13.1667	2077.33	11.7143	2090.13	58.0357	2083.08	11.1696	2053.28	10.45	2047.41	11.35	2071.54	13.4167	2026.88	10.1429	1995.4	11.85	2041.51	10.0357	2038.29	9.89583	2054.54	10.625
2128.27	10.538	2098.01	14.069	2073.18	7.25	2078.82	13.575	2065.09	11.1481	2061.6	10.3295	2069.99	12.2143	2079.1	14.119	2091.9	58.4911	2084.85	10.6518	2055.06	11.225	2049.19	10.275	2073.32	14.75	2028.66	9.5	1997.19	11.625	2043.29	10.2857	2040.08	9.3125	2056.32	8.2625
2130.03	9.2766	2099.78	15.931	2074.96	13.3125	2080.6	11.5	2066.86	11.2315	2063.38	12.7273	2071.76	14.381	2080.87	12.6667	2093.67	60.5	2086.62	10.5179	2056.84	14.3	2050.97	9.325	2075.09	14.6667	2030.45	10.2857	1998.98	13.475	2045.07	9.57143	2041.86	10.1458	2058.1	8.9
2131.8	10.1155	2101.55	14.9195	2076.73	9.9375	2082.37	10.25	2068.64	9.10185	2065.16	11.1136	2073.54	14.119	2082.64	17.4524	2095.44	59.8482	2088.39	9.70536	2058.61	11.15	2052.75	9.7	2076.86	14.1667	2032.23	6.21429	2000.77	12.1125	2046.85	9.60714	2043.64	11.1875	2059.87	11.2
2133.56	9.54711	2103.32	14.4483	2078.5	11.5	2084.14	10.6	2070.41	9	2066.93	12.3068	2075.31	13.7857	2084.42	15.7143	2097.21	58.9018	2090.16	9.96429	2060.39	9.625	2054.53	8.7	2078.63	11.9167	2034.01	6.07143	2002.56	12.5625	2048.63	9.35714	2045.42	8.0625	2061.65	11.0875
2135.32	9.28875	2105.08	15.1552	2080.27	10.5625	2085.91	9.225	2072.18	10.8519	2068.71	11.5795	2077.08	12.8571	2086.19	13.9048	2098.97	60.8661	2091.93	10.5268	2062.17	8.925	2056.3	7.525	2080.41	11.5	2035.8	9.71429	2004.35	13.3	2050.41	9.66071	2047.2	9.39583	2063.43	7.875
2137.07	9.21277	2106.85	13.8678	2082.05	15.375	2087.68	10.975	2073.96	11.4074	2070.48	12.8523	2078.86	11.619	2087.96	12.7143	2100.74	61.9375	2093.7	12.0625	2063.94	11.15	2058.08	9.175	2082.18	9.16667	2037.58	12.6429	2006.14	11.75	2052.18	11.2321	2048.98	10.9167	2065.2	9.8625
2138.83	9.64742	2108.61	15.2414	2083.82	10.1875	2089.45	7.85	2075.73	10	2072.25	10.5795	2080.63	12.119	2089.73	13.6429	2102.51	60.6875	2095.47	9.13393	2065.72	11.475	2059.86	8.125	2083.95	12.6667	2039.36	12.5714	2007.93	12.7	2053.96	8.69643	2050.76	10.9583	2066.98	9.525
2140.59	9.37082	2110.38	15.3276	2085.59	11.6875	2091.22	11.35	2077.5	9.38889	2074.03	10.0341	2082.4	13.7381	2091.5	15.3571	2104.28	57.0446	2097.24	12.0446	2067.49	10.325	2061.63	9.325	2085.72	9.33333	2041.14	5.92857	2009.72	11.625	2055.74	8.71429	2052.53	10.7708	2068.75	7.925
2142.35	11.2249	2112.14	13.931	2087.36	11.8125	2092.99	10.05	2079.28	10.1667	2075.8	10.3636	2084.17	11.8333	2093.27	13.5714	2106.04	59.2232	2099.01	11.2411	2069.27	10.175	2063.41	8.45	2087.49	13.8333	2042.92	10.2857	2011.51	12.3375	2057.52	8.26786	2054.31	12.3333	2070.53	10.1375
2144.11	9.18237	2113.91	15.0115	2089.13	14.25	2094.76	10.75	2081.05	10.1296	2077.57	11.9545	2085.94	12.381	2095.04	14.1667	2107.81	60.4732	2100.77	11.6607	2071.04	9.125	2065.19	9.975	2089.26	10.1667	2044.7	12.0714	2013.29	13.1	2059.29	9.64286	2056.09	9.79167	2072.3	11.525
2145.87	9.34347	2115.67	14.2356	2090.9	11	2096.53	10.925	2082.82	9.56481	2079.35	9.70455	2087.71	13.7381	2096.8	17.0476	2109.57	58.9018	2102.54	11.1875	2072.82	12.2	2066.96	8.9	2091.03	11	2046.48	7.21429	2015.08	11.025	2061.07	9.58929	2057.87	8.8125	2074.08	7.9875
2147.62	9.53799	2117.44	13.8333	2092.67	15.3125	2098.3	11.675	2084.59	10.4444	2081.12	11.6023	2089.48	11.0238	2098.57	12.7381	2111.34	57.0268	2104.31	11.8304	2074.59	11.55	2068.74	10.775	2092.8	12	2048.26	8.35714	2016.87	12.5375	2062.85	9.57143	2059.64	8.95833	2075.85	9.275
2149.38	9.92401	2119.2	15.5575	2094.44	9.125	2100.06	11.425	2086.36	10.5	2082.89	10.6136	2091.25	12.9048	2100.34	13.2857	2113.1	58.8304	2106.07	9.51786	2076.36	9	2070.51	12.25	2094.57	12.6667	2050.04	12.1429	2018.66	12.0625	2064.62	11.3929	2061.42	10.0833	2077.62	10.925
2151.14	9.45593	2120.96	12.977	2096.21	12.0625	2101.83	10.25	2088.13	9.87963	2084.66	11.875	2093.02	11.2381	2102.11	12.5238	2114.87	61.8393	2107.84	11.8661	2078.14	9.975	2072.29	9.3	2096.34	9.83333	2051.82	13.7143	2020.44	12.075	2066.4	9.98214	2063.2	10.1042	2079.39	9.525
2152.89	9.62006	2122.73	15.3448	2097.97	12.75	2103.6	10.875	2089.9	11.2963	2086.43	11.2614	2094.79	13.0238	2103.87	14.0476	2116.63	61.4375	2109.61	11.1071	2079.91	10	2074.06	9.8	2098.11	11.8333	2053.6	12.8571	2022.23	12.3	2068.17	8.98214	2064.97	8.8125	2081.17	9.4125
2154.65	8.86322	2124.49	14.2874	2099.74	8.6875	2105.37	11.25	2091.67	11.1759	2088.2	12.625	2096.56	10.2619	2105.64	12.0952	2118.4	57.2589	2111.37	10.7679	2081.68	10.2	2075.83	7.775	2099.88	11	2055.38	8.07143	2024.01	11.4875	2069.95	10.6786	2066.75	10.4375	2082.94	10.925
2156.4	9.6079	2126.25	12.6782	2101.51	17.6875	2107.13	9.55	2093.44	10.1204	2089.97	11.25	2098.33	10.8095	2107.41	13.1905	2120.16	60.8661	2113.14	9.58929	2083.45	10.95	2077.61	8.675	2101.64	16.5	2057.15	14.2143	2025.8	11.3875	2071.72	10.6786	2068.52	8.95833	2084.71	10.3
2158.16	9.90274	2128.01	14.4023	2103.28	8.5	2108.9	10.625	2095.21	11.7778	2091.74	11.8409	2100.09	12.3571	2109.17	12.4524	2121.92	60.6696	2114.9	10.7143	2085.22	11	2079.38	10.175	2103.41	18.75	2058.93	10.4286	2027.58	10.9375	2073.5	9.51786	2070.3	11.6042	2086.48	9.2
2159.91	10.1915	2129.77	15.0057	2105.04	12.8125	2110.66	11.55	2096.98	10.1111	2093.51	10.7955	2101.86	12.8333	2110.94	12.7143	2123.68	59.2768	2116.66	10.9196	2086.99	9.7	2081.15	9.275	2105.18	12.5	2060.71	9.71429	2029.36	10	2075.27	11.6071	2072.07	11.375	2088.25	8.675
2161.67	9.54103	2131.53	13.5517	2106.81	11.8125	2112.43	10.925	2098.75	8.75926	2095.28	11.625	2103.63	12.1905	2112.7	12.5	2125.45	58.3304	2118.43	11.9911	2088.76	10.8	2082.92	8.725	2106.94	11.9167	2062.48	6.85714	2031.15	12.475	2077.04	10.3929	2073.85	10.0417	2090.02	10.1125
2163.42	9.81763	2133.29	15.5862	2108.58	7.1875	2114.19	8.675	2100.52	8.50926	2097.05	10.0795	2105.4	13.2857	2114.47	12.5714	2127.21	61.7679	2120.19	9.40179	2090.53	11.45	2084.69	10.775	2108.71	13.1667	2064.26	9.78571	2032.93	11	2078.82	9.91071	2075.62	10.4375	2091.79	9.2125
2165.17	8.85106	2135.05	13.1782	2110.34	8.5625	2115.96	9.825	2102.28	10.7407	2098.82	12.2727	2107.16	11.7619	2116.23	15.2619	2128.97	60.6786	2121.95	9.00893	2092.3	8.5	2086.46	11.15	2110.47	9.41667	2066.03	10.0714	2034.71	13.025	2080.59	8.53571	2077.39	10.6042	2093.56	7.825
2166.93	9.46809	2136.81	14.6034	2112.11	13.75	2117.72	8.425	2104.05	11.537	2100.59	10.6477	2108.93	11.1429	2117.99	14.2143	2130.73	61.1964	2123.72	9.83929	2094.07	11.4	2088.23	10.125	2112.24	11.8333	2067.81	7.78571	2036.5	9.9375	2082.36	11.75	2079.17	9.5	2095.33	9.75
2168.68	8.65046	2138.57	14.7184	2113.87	12.8125	2119.48	13	2105.82	8.35185	2102.35	10.8636	2110.69	9.97619	2119.76	12.9762	2132.49	60.1518	2125.48	11.5893	2095.84	10.9	2090	7.35	2114	12.8333	2069.58	7.57143	2038.28	11.8125	2084.13	9.14286	2080.94	11.0208	2097.1	10.2
2170.43	9.77812	2140.33	13.9713	2115.64	12.25	2121.25	11.3	2107.58	9.5	2104.12	10.75	2112.46	10.3333	2121.52	13.2857	2134.25	59.4554	2127.24	9.54464	2097.61	10.125	2091.77	8.775	2115.77	14.0833	2071.36	11.2143	2040.06	12.0625	2085.9	9.66071	2082.71	10.4167	2098.86	9.55
2172.18	9.11246	2142.09	14.2989	2117.4	9.1875	2123.01	12.8	2109.35	10.5	2105.89	10.4205	2114.22	12.1905	2123.28	13.3095	2136.01	58.7589	2129	9.84821	2099.38	8.975	2093.54	8.6	2117.53	13.75	2073.13	11.6429	2041.84	11.9625	2087.67	10.1071	2084.48	11.7708	2100.63	8.3125
2173.93	9.83587	2143.85	14.1149	2119.16	10.75	2124.77	10.75	2111.11	10.7685	2107.65	10.5682	2115.99	10.8095	2125.04	14.2381	2137.77	61.2768	2130.76	9.39286	2101.15	8.375	2095.31	10.5	2119.3	12.6667	2074.91	10.2143	2043.62	10.0375	2089.44	8.51786	2086.25	9.77083	2102.4	10.4375
2175.68	9.76596	2145.61	13.8046	2120.93	10.75	2126.53	12.075	2112.88	8.31481	2109.42	9.90909	2117.75	10.4762	2126.81	15.7381	2139.53	62.4107	2132.52	10.8929	2102.91	10.825	2097.08	8.875	2121.06	9.58333	2076.68	7.5	2045.4	12.7875	2091.21	8.78571	2088.02	9.4375	2104.17	9.375
2177.43	9.43161	2147.36	15.2816	2122.69	10.625	2128.3	11.15	2114.64	10.2315	2111.18	11.2159	2119.51	11.1429	2128.57	13.0714	2141.29	59.3482	2134.28	9.41964	2104.68	9.675	2098.85	8.725	2122.82	11.8333	2078.45	9.85714	2047.18	10.975	2092.98	9.96429	2089.79	11.25	2105.93	7.025
2179.18	9.46201	2149.12	13.1437	2124.45	14.625	2130.06	9.075	2116.41	8.01852	2112.95	11.1705	2121.28	12.0952	2130.33	15.1667	2143.05	59.9821	2136.04	11	2106.45	11.825	2100.62	9.95	2124.58	10.0833	2080.22	10.0714	2048.96	9.625	2094.75	10.3393	2091.56	11.75	2107.7	9.2875
2180.93	9.83891	2150.88	15.023	2126.21	7.6875	2131.82	9.025	2118.17	10.0463	2114.71	11.9886	2123.04	12.6905	2132.09	13.9048	2144.8	61.0536	2137.8	10.5714	2108.21	10.775	2102.38	9.4	2126.35	9.41667	2082	8.64286	2050.74	10.425	2096.52	8.94643	2093.33	11.0208	2109.46	9.65
2182.68	9.02128	2152.63	14.0345	2127.97	13.75	2133.58	9.55	2119.94	10.25	2116.48	9.53409	2124.8	11	2133.85	11.7619	2146.56	61.1429	2139.56	10.2589	2109.98	8.775	2104.15	8.75	2128.11	14.5	2083.77	10.2143	2052.52	12.1	2098.29	9.67857	2095.1	9.52083	2111.23	7.6875
2184.43	9.21581	2154.39	13.6264	2129.74	11.5	2135.34	11.075	2121.7	9.93519	2118.24	10.875	2126.56	11.5476	2135.61	10.119	2148.32	59.9911	2141.32	8.91964	2111.74	11.175	2105.92	9.175	2129.87	12.9167	2085.54	8.71429	2054.3	12.8375	2100.06	10.4464	2096.87	9.54167	2113	9.2375
2186.18	9.37386	2156.14	14.3966	2131.5	9.5	2137.1	11.125	2123.46	9.85185	2120	9.77273	2128.32	11.9048	2137.37	12.5476	2150.07	59.2232	2143.08	9.58929	2113.51	11.2	2107.68	9.6	2131.63	15.4167	2087.31	13.4286	2056.07	11.975	2101.82	10.6786	2098.64	12.7708	2114.76	9.9
2187.93	9.59574	2157.9	13.7356	2133.26	8.0625	2138.86	9.975	2125.22	8.93519	2121.77	9.78409	2130.09	12.0952	2139.13	13.0714	2151.83	61.9821	2144.83	9.36607	2115.27	10.75	2109.45	8.8	2133.39	8.91667	2089.08	8	2057.85	12.2125	2103.59	8.92857	2100.4	10.2292	2116.52	8.0875
2189.67	9.92097	2159.65	13.592	2135.02	10.625	2140.61	9.825	2126.98	9.18519	2123.53	11.6591	2131.85	12.1905	2140.89	10.9048	2153.59	59.4643	2146.59	9.08036	2117.04	9.125	2111.21	7.525	2135.15	9.25	2090.85	7.78571	2059.63	10.0375	2105.36	8.875	2102.17	9.5625	2118.29	7.9375
2191.42	9.47112	2161.41	14.023	2136.78	15.5	2142.37	7.575	2128.75	9.38889	2125.29	10.2273	2133.61	11.5714	2142.64	12.6429	2155.34	59.875	2148.35	9.15179	2118.8	10.85	2112.98	9.975	2136.91	12.1667	2092.62	8.21429	2061.41	10.2625	2107.12	10.3571	2103.94	10.4167	2120.05	8.875
2193.17	9.72036	2163.16	13.8103	2138.54	9.625	2144.13	12.025	2130.51	10.0278	2127.05	11	2135.37	12.8333	2144.4	12.5	2157.1	60.7589	2150.1	10.3393	2120.56	11.425	2114.74	8.1	2138.67	11.5833	2094.39	14.1429	2063.18	11.3125	2108.89	9.66071	2105.71	8.54167	2121.81	8.4875
2194.91	9.74468	2164.91	15.2471	2140.29	12	2145.89	9.3	2132.27	11.9907	2128.82	9.92045	2137.13	9.59524	2146.16	14.6667	2158.85	59.8571	2151.86	10.5982	2122.33	8.95	2116.51	9.25	2140.43	14.5833	2096.16	10.2143	2064.96	11.6875	2110.65	9.125	2107.47	9	2123.58	8.1875
2196.66	9.12462	2166.66	13.3276	2142.05	14.9375	2147.65	12.775	2134.03	7.67593	2130.58	10.1136	2138.88	11.119	2147.92	12.3095	2160.6	57.6161	2153.62	11.2411	2124.09	10.4	2118.27	9.95	2142.18	10.9167	2097.93	5.92857	2066.73	12.0875	2112.42	8.125	2109.24	7.8125	2125.34	9.475
2198.41	9.83587	2168.42	12.8391	2143.81	15.6875	2149.4	9.2	2135.79	8.47222	2132.34	10.0455	2140.64	12.6667	2149.67	11.5714	2162.36	59.7679	2155.37	10.2321	2125.85	14.175	2120.03	7.025	2143.94	11.1667	2099.69	9.14286	2068.51	9.575	2114.18	10.4821	2111	8.70833	2127.1	8
2200.15	9.3465	2170.17	14.1839	2145.57	12.375	2151.16	8.775	2137.55	8.93519	2134.1	10.5682	2142.4	13.2857	2151.43	12.7619	2164.11	59.8839	2157.13	11.0446	2127.61	7.5	2121.8	9.3	2145.7	8	2101.46	9.64286	2070.28	11.7625	2115.95	10.0714	2112.77	11.3125	2128.86	7.475
2201.9	9.55319	2171.92	13.5632	2147.33	14.4375	2152.91	8.6	2139.31	10.1574	2135.86	11.25	2144.16	13.9762	2153.18	13.7619	2165.86	59.7589	2158.88	9.99107	2129.37	10.95	2123.56	6.875	2147.46	11.5	2103.23	10.2857	2072.06	10.3875	2117.71	9.58929	2114.53	9.125	2130.62	8.4625
2203.64	9.66565	2173.67	13.9425	2149.08	14.1875	2154.67	10.825	2141.06	10.8704	2137.62	11.1136	2145.92	10.3571	2154.94	13.4524	2167.62	60.0625	2160.63	10.1786	2131.13	11.85	2125.32	8.425	2149.21	12.8333	2104.99	7.92857	2073.83	11.8125	2119.48	9.98214	2116.3	10.3333	2132.38	9.35
2205.38	9.86626	2175.42	14.8161	2150.84	9.875	2156.42	8.55	2142.82	9.77778	2139.37	8.96591	2147.67	14.1905	2156.69	16.0714	2169.37	58.9732	2162.39	11.0536	2132.89	10.15	2127.08	10	2150.97	14.1667	2106.76	12.2143	2075.6	10.425	2121.24	9.07143	2118.06	10.2083	2134.14	8.25
2207.13	8.95441	2177.17	14.4138	2152.59	10.9375	2158.18	11.2	2144.58	9.11111	2141.13	10.9432	2149.43	9.28571	2158.45	12.0714	2171.12	61.0268	2164.14	10.125	2134.65	10.7	2128.84	7.55	2152.73	10.25	2108.53	10.6429	2077.38	11.525	2123	8.91071	2119.82	8.20833	2135.9	6.35
2208.87	9.61702	2178.92	14.1322	2154.35	14.25	2159.93	9.175	2146.34	10.4167	2142.89	10.2727	2151.19	11.881	2160.2	13.5238	2172.87	60.0625	2165.89	9.625	2136.41	11.875	2130.6	8.45	2154.48	14	2110.29	7.57143	2079.15	10.725	2124.76	10.2321	2121.59	7.95833	2137.66	8.7375
2210.61	8.41945	2180.67	13.9195	2156.1	9.9375	2161.69	10.375	2148.09	10.0833	2144.65	11.8068	2152.94	14.0952	2161.96	13.5238	2174.62	59.625	2167.65	9.22321	2138.17	10.55	2132.37	10.9	2156.24	7.83333	2112.06	9.21429	2080.92	10.925	2126.52	9.25	2123.35	12.7292	2139.42	9.2875
2212.36	9.82675	2182.42	13.7241	2157.86	12.875	2163.44	9.675	2149.85	10.3981	2146.41	10.5568	2154.7	12.2619	2163.71	12.7143	2176.37	59.9911	2169.4	10.9286	2139.93	10.2	2134.13	10.125	2157.99	9.41667	2113.82	8	2082.69	11.4	2128.29	10.0357	2125.11	10.5625	2141.18	8.35
2214.1	9.29483	2184.17	14.1839	2159.61	11.8125	2165.19	11.625	2151.61	10.2222	2148.16	9.86364	2156.45	11.2381	2165.46	11.1905	2178.12	57.8304	2171.15	9.80357	2141.69	10.775	2135.88	10.95	2159.75	7.58333	2115.59	12.2857	2084.46	12.05	2130.05	8.80357	2126.87	9.75	2142.94	10.6
2215.84	9.2462	2185.92	14.0977	2161.37	8.6875	2166.95	10.2	2153.36	8.48148	2149.92	11.8068	2158.21	11.2143	2167.22	13.6667	2179.87	60.6875	2172.9	10.0625	2143.45	10.5	2137.64	8.85	2161.5	9.25	2117.35	10.2143	2086.24	8.9375	2131.81	8.875	2128.63	8.97917	2144.69	9.8625
2217.58	8.74468	2187.67	13.7586	2163.12	10.875	2168.7	9.775	2155.12	10.1574	2151.68	10.0227	2159.96	10.7143	2168.97	14.0476	2181.62	59.8661	2174.65	11.2321	2145.2	8.275	2139.4	9.25	2163.25	9.91667	2119.11	8.35714	2088.01	10.95	2133.57	11.3393	2130.4	10.3333	2146.45	8.625
2219.32	9.89362	2189.41	14.9943	2164.87	10.4375	2170.45	8.95	2156.87	10.9352	2153.43	10.7614	2161.71	11.881	2170.72	12.5238	2183.37	57.4196	2176.4	11.6161	2146.96	8.9	2141.16	11.6	2165.01	12.75	2120.88	9.21429	2089.78	9.1	2135.33	11.6786	2132.16	7.8125	2148.21	7.5625
2221.06	9.19453	2191.16	12.2471	2166.63	15.6875	2172.2	9.525	2158.63	9.69444	2155.19	10.75	2163.47	10.6429	2172.47	11.3095	2185.12	58.0893	2178.15	9.11607	2148.72	10.85	2142.92	7.05	2166.76	14.0833	2122.64	9.07143	2091.55	11.5625	2137.09	10.2321	2133.92	9.72917	2149.97	10.575
2222.8	10.0699	2192.91	13.9138	2168.38	7.375	2173.95	10.825	2160.38	9.34259	2156.94	11.8295	2165.22	10.8333	2174.22	13.3095	2186.87	61.2679	2179.9	7.75893	2150.48	10.55	2144.68	9.325	2168.51	14.6667	2124.4	11.9286	2093.32	11.9125	2138.85	8.66071	2135.68	11.1042	2151.72	8.4375
2224.54	9.6231	2194.65	13.569	2170.13	10	2175.7	11.225	2162.14	9.17593	2158.7	10.7727	2166.97	11.5952	2175.97	14.6429	2188.62	60.2679	2181.65	10.9286	2152.23	10.725	2146.43	8.225	2170.26	13.0833	2126.16	9.78571	2095.08	10.6375	2140.6	8.53571	2137.43	10.2292	2153.48	8.075
2226.28	10.4711	2196.4	13.0805	2171.88	13.3125	2177.45	7.9	2163.89	9.16667	2160.45	10.8182	2168.73	12.2619	2177.72	13.0238	2190.36	58.2946	2183.4	8.25	2153.99	10.175	2148.19	8.45	2172.01	7.75	2127.92	8.42857	2096.85	9.95	2142.36	7.82143	2139.19	8.70833	2155.23	8.2875
2228.02	9.05167	2198.15	12.6839	2173.63	5.9375	2179.2	10.05	2165.64	9.27778	2162.2	10.2159	2170.48	8.80952	2179.47	13.9286	2192.11	58.8839	2185.15	9.44643	2155.74	10.875	2149.95	8.025	2173.77	8.91667	2129.69	9.64286	2098.62	10.75	2144.12	8.10714	2140.95	8.41667	2156.99	9.3375
2229.76	9.29787	2199.89	13.9943	2175.39	11.25	2180.95	9.7	2167.4	10.5833	2163.96	10.2841	2172.23	11.619	2181.22	12.5952	2193.86	61.0804	2186.9	9.13393	2157.5	12.95	2151.7	10.125	2175.52	13.8333	2131.45	8.07143	2100.39	11.8625	2145.88	8.69643	2142.71	9.70833	2158.74	7.3625
2231.5	9.53799	2201.64	12.0862	2177.14	8	2182.7	10.325	2169.15	10.6111	2165.71	11.8636	2173.98	11.7381	2182.97	12.2619	2195.6	57.5714	2188.64	10.0179	2159.25	9.9	2153.46	8.425	2177.27	8.66667	2133.21	6.85714	2102.16	10.525	2147.64	6.73214	2144.47	8.39583	2160.5	9.125
2233.24	10.307	2203.38	14.2184	2178.89	16.0625	2184.45	11.175	2170.9	7.63889	2167.46	9.875	2175.73	11.5952	2184.72	9.19048	2197.35	61.0268	2190.39	9.67857	2161.01	11.475	2155.21	9.525	2179.02	9.83333	2134.97	6.21429	2103.92	11.3375	2149.39	9.51786	2146.23	9.60417	2162.25	7.5625
2234.97	9.80243	2205.12	12.6092	2180.64	13.875	2186.2	11.175	2172.65	9.17593	2169.22	10.1932	2177.48	11.3333	2186.47	12.6429	2199.09	61.0625	2192.14	10.3036	2162.76	10.775	2156.97	9.75	2180.77	9.08333	2136.73	8.78571	2105.69	11.55	2151.15	9.125	2147.98	9.02083	2164	8.1
2236.71	9.6383	2206.87	15.0115	2182.38	13.25	2187.95	10.975	2174.4	10.5093	2170.97	9.55682	2179.23	10.6667	2188.22	14.4762	2200.84	59.8393	2193.89	9.92857	2164.51	11.575	2158.72	9.05	2182.52	9.58333	2138.49	6.78571	2107.46	10.3625	2152.9	7.73214	2149.74	8.29167	2165.76	7.95
2238.45	10.3495	2208.61	14.2184	2184.13	14.9375	2189.7	9.25	2176.15	8.14815	2172.72	9.90909	2180.98	11.1667	2189.96	12.9286	2202.58	58.2143	2195.63	10.9554	2166.26	9.175	2160.48	8.8	2184.26	10.5	2140.24	6.35714	2109.22	10	2154.66	9.01786	2151.5	10.9375	2167.51	9.875
2240.18	10.2644	2210.35	13.1839	2185.88	11.875	2191.44	9.55	2177.9	9.57407	2174.47	9.94318	2182.73	11.7857	2191.71	13.5714	2204.33	60.8036	2197.38	10.5089	2168.02	10.725	2162.23	7.725	2186.01	15.5	2142	8.07143	2110.99	9.675	2156.41	8.53571	2153.25	9.66667	2169.26	8.75
2241.92	10.2401	2212.1	13.4885	2187.63	8.0625	2193.19	11.825	2179.65	9.14815	2176.22	10.875	2184.48	10.6667	2193.46	12.3095	2206.07	61.9554	2199.12	9.39286	2169.77	10.5	2163.99	7.1	2187.76	14.5833	2143.76	8.21429	2112.75	11.475	2158.17	8.125	2155.01	9.89583	2171.01	8.075
2243.65	9.93313	2213.84	13.8161	2189.38	12.375	2194.94	11.5	2181.4	9.34259	2177.97	10.0795	2186.23	11.6667	2195.2	9.97619	2207.81	62.4732	2200.87	8.33036	2171.52	10.875	2165.74	7.675	2189.51	10.8333	2145.52	7.07143	2114.52	11.275	2159.92	8.10714	2156.76	9.6875	2172.76	8.95
2245.39	8.83283	2215.58	15.2241	2191.12	9.5	2196.68	10.625	2183.15	9.0463	2179.72	11.0795	2187.97	9.35714	2196.95	13.0714	2209.56	60.3214	2202.61	11.0536	2173.27	11.525	2167.49	8.15	2191.25	10.5	2147.27	9.14286	2116.28	11.3875	2161.68	6.625	2158.52	9.64583	2174.51	10.5875
2247.12	10.1033	2217.32	15.3506	2192.87	9.6875	2198.43	9.775	2184.9	10.4074	2181.47	9.18182	2189.72	11.619	2198.69	12.9524	2211.3	61.5357	2204.36	9.9375	2175.02	8.025	2169.24	10.325	2193	14.6667	2149.03	5.71429	2118.04	11.925	2163.43	10.3036	2160.27	11.125	2176.27	8.6625
2248.86	8.79635	2219.06	12.2816	2194.62	9.375	2200.17	10.95	2186.65	11.3611	2183.22	8.47727	2191.47	11.8571	2200.44	14.0238	2213.04	61.5446	2206.1	11.1964	2176.77	10.175	2170.99	7.375	2194.75	14.4167	2150.79	9.92857	2119.81	10.6875	2165.18	7.51786	2162.02	10.125	2178.02	7.925
2250.59	8.88146	2220.8	14.4138	2196.36	11.5625	2201.92	11.65	2188.4	11.0741	2184.97	9.31818	2193.22	8.88095	2202.18	15.5	2214.78	59.2768	2207.84	8.54464	2178.52	11.75	2172.75	6.025	2196.49	12.8333	2152.54	9.57143	2121.57	11.625	2166.94	7.44643	2163.78	9.5625	2179.76	9.8375
2252.33	9.16109	2222.54	14.7586	2198.11	13.875	2203.66	10.475	2190.14	9.31481	2186.72	10.3864	2194.96	11.5952	2203.93	15.2143	2216.53	61.5714	2209.59	9.66071	2180.27	11.125	2174.5	6.925	2198.24	10.1667	2154.3	6.78571	2123.33	11	2168.69	7.96429	2165.53	8.85417	2181.51	8.7875
2254.06	9.33435	2224.28	14.0402	2199.86	9.5625	2205.41	8.45	2191.89	9.28704	2188.46	9.04545	2196.71	13.3571	2205.67	16.6429	2218.27	62.2411	2211.33	10.3304	2182.02	10.375	2176.25	7.35	2199.98	11.8333	2156.05	4.71429	2125.1	9.9625	2170.44	9.96429	2167.28	9.60417	2183.26	6.925
2255.79	8.38298	2226.02	14.3908	2201.6	15.6875	2207.15	11.7	2193.64	9.13889	2190.21	9.40909	2198.45	10.2619	2207.41	12.2619	2220.01	58.8214	2213.07	9.19643	2183.77	9.525	2178	9.175	2201.73	13.1667	2157.81	6.21429	2126.86	10.75	2172.19	8.05357	2169.04	8.95833	2185.01	8.9
2257.52	9.45593	2227.76	13.4713	2203.34	8.5	2208.89	11.225	2195.38	9.13889	2191.96	11.5114	2200.2	11.8095	2209.16	12.4762	2221.75	61.3393	2214.81	8.86607	2185.52	11.775	2179.75	8.525	2203.47	14.0833	2159.56	8.14286	2128.62	10.4125	2173.94	8.16071	2170.79	9.66667	2186.76	9.0375
2259.25	8.99392	2229.5	14.069	2205.09	12.8125	2210.63	10.15	2197.13	10.5926	2193.7	9.92045	2201.94	10.8333	2210.9	13.4048	2223.49	60.9732	2216.55	10.4643	2187.27	11.025	2181.5	9.175	2205.22	11.9167	2161.32	5.07143	2130.38	13.0125	2175.69	10.1964	2172.54	10.3958	2188.51	7.6125
2260.99	9.4924	2231.24	15.0172	2206.83	12.25	2212.38	10.35	2198.87	9.47222	2195.45	10.5909	2203.69	10.8095	2212.64	12.7857	2225.23	60.6607	2218.3	10.0179	2189.02	9.75	2183.25	9.875	2206.96	10.5	2163.07	6.28571	2132.14	11.625	2177.44	9.875	2174.29	8.58333	2190.26	7.2375
2262.72	9.02432	2232.98	12.8736	2208.58	11.25	2214.12	9.175	2200.62	8.9537	2197.2	10.7841	2205.43	8.92857	2214.38	14.1905	2226.97	59.2679	2220.04	10.7321	2190.76	10.1	2184.99	8.4	2208.71	10.75	2164.82	7.71429	2133.9	11.0875	2179.19	8.64286	2176.04	9.16667	2192	10.1625
2264.45	9.83283	2234.71	14.8333	2210.32	12.6875	2215.86	10.575	2202.36	10.7593	2198.94	11.1364	2207.18	11.9048	2216.13	13.2857	2228.7	62.8125	2221.78	9.90179	2192.51	9.475	2186.74	8.125	2210.45	12.1667	2166.58	10.1429	2135.66	11.2625	2180.94	8.57143	2177.79	9.6875	2193.75	8.2125
2266.18	9.06079	2236.45	13.7644	2212.06	10.625	2217.6	11.05	2204.11	10.9444	2200.69	10.2841	2208.92	13	2217.87	12.5476	2230.44	62.0893	2223.52	11.0625	2194.26	9.05	2188.49	10.425	2212.19	13.6667	2168.33	6	2137.42	10.375	2182.69	8.71429	2179.54	10.625	2195.5	7.3375
2267.91	9.46505	2238.19	13.0172	2213.8	12.25	2219.34	8.725	2205.85	8.9537	2202.43	10.4545	2210.66	10.381	2219.61	10.5	2232.18	62.0357	2225.26	9.21429	2196	10.95	2190.24	8.95	2213.93	11.25	2170.08	7.64286	2139.18	10.6375	2184.44	8.03571	2181.29	8.25	2197.24	9.3875
2269.64	9.23708	2239.92	14.4368	2215.54	11.625	2221.08	10	2207.6	8.09259	2204.18	11.625	2212.4	9.92857	2221.35	15.3333	2233.92	60.4286	2226.99	10.1161	2197.75	9.05	2191.98	8.675	2215.67	10	2171.83	8.92857	2140.94	9.325	2186.19	9.67857	2183.04	10.1667	2198.99	9.4125
2271.37	9.31003	2241.66	12.2759	2217.29	7.0625	2222.82	8.475	2209.34	10.1759	2205.92	8.84091	2214.15	11.8571	2223.09	14.7619	2235.66	60.3482	2228.73	10.3571	2199.49	9.3	2193.73	8.425	2217.42	9.58333	2173.58	8	2142.69	12.475	2187.94	9.91071	2184.79	11.1458	2200.73	7.3125
2273.1	9.53191	2243.39	13.592	2219.03	13.125	2224.56	9.85	2211.08	9.71296	2207.66	10.6705	2215.89	10.7143	2224.83	14.5	2237.39	60.0804	2230.47	11.7411	2201.24	10.4	2195.48	7.9	2219.16	7	2175.33	5.28571	2144.45	9.9375	2189.68	8.35714	2186.54	9.375	2202.48	8.1875
2274.82	9.65957	2245.13	14.2011	2220.77	14.375	2226.3	10.475	2212.82	8.89815	2209.41	10.8636	2217.63	10.1667	2226.57	12.8571	2239.13	60.3929	2232.21	10.7946	2202.98	11.55	2197.22	7.825	2220.9	16.5833	2177.08	8	2146.21	10.3125	2191.43	7.96429	2188.28	10.7292	2204.22	9.1
2276.55	9.6383	2246.86	12.1897	2222.51	8.1875	2228.04	8.15	2214.57	8.30556	2211.15	9.75	2219.37	10.7143	2228.31	11.9762	2240.86	61.7679	2233.95	10.8036	2204.73	11.075	2198.97	7.175	2222.64	10.75	2178.83	6	2147.97	10.7	2193.18	8.55357	2190.03	9.875	2205.96	7.1875
2278.28	9.84195	2248.6	15.0977	2224.25	12.625	2229.78	9.825	2216.31	10.4259	2212.89	10.6023	2221.11	13.9048	2230.04	12.6429	2242.6	62.9375	2235.68	10.4286	2206.47	11.175	2200.71	8.85	2224.38	9.25	2180.58	12.4286	2149.72	9.9	2194.93	8.94643	2191.78	8.47917	2207.71	6.025
2280.01	9.53495	2250.33	13.5862	2225.99	13.75	2231.52	10.65	2218.05	8.15741	2214.63	10.125	2222.85	11.2619	2231.78	14	2244.34	61.8482	2237.42	10.5268	2208.21	12.45	2202.46	8.65	2226.12	12.1667	2182.33	6.5	2151.48	9.0125	2196.67	9.85714	2193.52	8.72917	2209.45	8.9
2281.73	10.003	2252.07	13.6954	2227.73	13.375	2233.26	10.125	2219.79	8.06481	2216.37	11.5114	2224.59	12.4286	2233.52	15.7143	2246.07	61.0179	2239.16	9.91964	2209.96	10.625	2204.2	6.8	2227.85	11.5833	2184.08	6.28571	2153.24	9.725	2198.42	8.58929	2195.27	10.2083	2211.19	7.875
2283.46	9.52888	2253.8	14.4023	2229.46	12.875	2234.99	8.8	2221.53	9.80556	2218.12	11.6364	2226.33	11.6429	2235.26	13.9762	2247.8	60.4732	2240.89	10.7321	2211.7	8.65	2205.95	8.425	2229.59	14.1667	2185.83	7.64286	2154.99	11.9125	2200.16	10.0357	2197.02	8.77083	2212.94	7.65
2285.19	9.25228	2255.53	13.7644	2231.2	11.375	2236.73	11.125	2223.27	9.03704	2219.86	8.75	2228.07	14.119	2236.99	15.3095	2249.54	61.6429	2242.63	9.03571	2213.44	12.275	2207.69	8.325	2231.33	12.3333	2187.58	8.92857	2156.75	9.975	2201.91	7.78571	2198.76	9.875	2214.68	7.6625
2286.91	9.31003	2257.26	13.4368	2232.94	8.9375	2238.47	8.75	2225.01	9.37037	2221.6	10.9091	2229.81	12.5	2238.73	16.2143	2251.27	61.375	2244.36	10.8125	2215.18	11.375	2209.43	9.975	2233.07	12.75	2189.33	7.5	2158.5	11.2625	2203.65	8.82143	2200.51	8.45833	2216.42	8.7625
2288.64	9.63526	2259	13.408	2234.68	8.5	2240.2	9.075	2226.75	8.14815	2223.34	12.0568	2231.54	12.0238	2240.47	13.6667	2253.01	62.3839	2246.1	9.08929	2216.92	10.55	2211.18	10.975	2234.81	10.4167	2191.07	6.85714	2160.25	10.2875	2205.39	9.64286	2202.25	9.64583	2218.16	6.125
2290.36	9.2766	2260.73	12.3678	2236.41	12.875	2241.94	7.275	2228.49	8.81481	2225.08	11.6364	2233.28	12.4048	2242.2	12.5476	2254.74	61.3661	2247.83	9.83929	2218.67	8.15	2212.92	7.55	2236.54	6.33333	2192.82	9.92857	2162.01	12.3	2207.14	7.78571	2204	10.7083	2219.9	8.7625
2292.09	9.61398	2262.46	13.9253	2238.15	10.8125	2243.67	11.05	2230.23	11.7222	2226.82	10.8182	2235.02	12.3095	2243.94	12.4762	2256.47	61.9643	2249.57	8.99107	2220.41	11.825	2214.66	9.1	2238.28	12.9167	2194.57	12.1429	2163.76	9.7875	2208.88	8.71429	2205.74	8.79167	2221.64	8.1625
2293.81	9.30699	2264.19	13.3046	2239.89	9.75	2245.41	10.35	2231.96	8.90741	2228.55	11.9318	2236.76	14.4524	2245.67	10.5952	2258.2	62.5446	2251.3	8.74107	2222.15	6.85	2216.4	9.525	2240.02	8.5	2196.31	6.42857	2165.51	12.6	2210.62	7.625	2207.48	9.83333	2223.38	8.5125
2295.53	10.0122	2265.92	13.5402	2241.62	14	2247.14	9.65	2233.7	9.90741	2230.29	10.75	2238.49	13.9048	2247.41	14.7619	2259.93	63.0982	2253.03	9.91071	2223.89	10.175	2218.14	8.75	2241.75	13.3333	2198.06	6.64286	2167.27	9.6	2212.37	8.41071	2209.23	9.20833	2225.12	8.3125
2297.26	9.48632	2267.65	13.454	2243.36	12.125	2248.88	10.975	2235.44	8.02778	2232.03	10.6023	2240.23	12.7857	2249.14	14.9524	2261.67	61.3571	2254.77	9.98214	2225.63	10.65	2219.88	9.6	2243.49	10.5833	2199.8	9.5	2169.02	10.1375	2214.11	8.01786	2210.97	10.3333	2226.86	8.6
2298.98	10.1611	2269.38	13.7184	2245.09	10.3125	2250.61	8.975	2237.18	9.34259	2233.77	9.32955	2241.96	12.6667	2250.87	15.2619	2263.4	62.4554	2256.5	9.61607	2227.36	8.6	2221.62	9.275	2245.22	7.75	2201.55	12.2857	2170.77	10.175	2215.85	8.78571	2212.71	8.9375	2228.6	9.275
2300.7	9.59271	2271.11	13.8793	2246.83	12.25	2252.34	10	2238.91	11.7593	2235.51	10.7273	2243.7	14.0952	2252.61	12.8333	2265.13	61.9464	2258.23	10.25	2229.1	9.9	2223.36	6.975	2246.96	10.3333	2203.29	10.0714	2172.52	9.65	2217.59	10.5179	2214.45	9.89583	2230.34	7.7625
2302.43	9.44073	2272.84	14.2471	2248.56	14	2254.08	9.2	2240.65	9.19444	2237.24	10.6364	2245.43	11.2619	2254.34	15.5	2266.86	62.1696	2259.96	11.0536	2230.84	9.775	2225.1	12.125	2248.69	11	2205.04	10	2174.27	10.35	2219.33	9.71429	2216.2	10.6875	2232.07	9.15
2304.15	8.9696	2274.57	13.3218	2250.3	13.25	2255.81	9.55	2242.38	9.37037	2238.98	10.4091	2247.17	10.8095	2256.07	13.4762	2268.59	61.9911	2261.69	10.6339	2232.58	10.9	2226.84	8.525	2250.43	12.9167	2206.78	7.35714	2176.02	10.4	2221.07	8.94643	2217.94	10.6667	2233.81	9.5375
2305.87	9.42857	2276.29	14.3793	2252.03	7.375	2257.54	10.425	2244.12	9.97222	2240.72	8.73864	2248.9	13.4286	2257.8	15.2619	2270.32	63.4107	2263.42	9.11607	2234.32	12.125	2228.58	8.275	2252.16	16.25	2208.52	8.07143	2177.77	10.275	2222.81	10.4464	2219.68	7.85417	2235.55	8.2125
2307.59	9.03951	2278.02	13.6034	2253.76	13.25	2259.27	11.475	2245.85	9.5463	2242.45	9.60227	2250.64	13.5	2259.54	14	2272.05	64.3661	2265.15	11.1696	2236.05	9.7	2230.32	9.025	2253.89	4.66667	2210.27	4.71429	2179.52	9.5625	2224.55	9.05357	2221.42	10.25	2237.29	8
2309.31	9.35562	2279.75	14.046	2255.5	11.5	2261.01	10.725	2247.59	9.58333	2244.19	9.40909	2252.37	12.2857	2261.27	12.619	2273.77	60.4018	2266.89	8.53571	2237.79	12.7	2232.06	9.4	2255.62	11.6667	2212.01	9.14286	2181.27	8.825	2226.29	10.375	2223.16	10.7708	2239.02	9.975
2311.03	9.3465	2281.48	14.0287	2257.23	9.25	2262.74	9.425	2249.32	10.0278	2245.92	9.63636	2254.1	13.5	2263	11.6905	2275.5	61.4107	2268.61	10.125	2239.53	11.2	2233.79	9.1	2257.36	12.75	2213.75	11	2183.02	11.6	2228.03	6.625	2224.9	8.77083	2240.76	8.6125
2312.75	9.3921	2283.2	13.2414	2258.96	10.3125	2264.47	10.075	2251.06	10.5741	2247.66	10.1364	2255.84	11.3571	2264.73	14.5714	2277.23	63.6964	2270.34	10.4643	2241.26	10.775	2235.53	6.775	2259.09	11.1667	2215.49	9.14286	2184.77	10.175	2229.77	7.76786	2226.64	10.6042	2242.49	9
2314.47	8.70213	2284.93	14.4483	2260.69	12.4375	2266.2	10.7	2252.79	9.80556	2249.39	10.9318	2257.57	10.1905	2266.46	14.7381	2278.96	62.375	2272.07	9.33036	2243	11.875	2237.27	8.725	2260.82	14.8333	2217.23	4.78571	2186.52	10.7125	2231.51	7.71429	2228.38	9.9375	2244.23	8.1875
2316.19	9.93313	2286.65	14.6552	2262.42	14.375	2267.93	7.475	2254.52	8.80556	2251.12	10.0568	2259.3	10.881	2268.19	11.4524	2280.68	62.9375	2273.8	8.55357	2244.73	8.725	2239	10.05	2262.55	11.1667	2218.97	7.28571	2188.27	9.8375	2233.24	7.64286	2230.11	8.91667	2245.96	10.675
2317.91	9.15198	2288.38	12.0575	2264.15	10.6875	2269.66	8.6	2256.26	8.96296	2252.86	10.9432	2261.03	8.88095	2269.92	11.5714	2282.41	63.4107	2275.53	10.2321	2246.47	8.025	2240.74	7.5	2264.28	8.25	2220.72	9.85714	2190.02	11.3125	2234.98	8.41071	2231.85	9.89583	2247.7	8.825
2319.63	9.6231	2290.1	13.8333	2265.88	13.3125	2271.39	9.275	2257.99	9.5	2254.59	9.57955	2262.76	12.1429	2271.65	13.1667	2284.14	64.5982	2277.26	9.71429	2248.2	11.05	2242.48	8.975	2266.01	14.5	2222.46	10	2191.76	10.825	2236.72	7.55357	2233.59	8.66667	2249.43	7.5125
2321.34	9.8693	2291.83	14.0115	2267.61	10.0625	2273.12	8.775	2259.72	8.76852	2256.32	10.5227	2264.49	11.9762	2273.38	15	2285.86	61.625	2278.98	11.2768	2249.94	10.675	2244.21	9.35	2267.74	11.25	2224.19	5.92857	2193.51	8.9125	2238.46	8.25	2235.33	10.7708	2251.17	9.35
2323.06	10.3009	2293.55	14.1552	2269.34	10.6875	2274.84	9.15	2261.45	10.8519	2258.05	10.375	2266.22	11.5	2275.1	15.3333	2287.59	64.4643	2280.71	8.4375	2251.67	8.925	2245.95	7.425	2269.47	9.58333	2225.93	8	2195.26	9.875	2240.19	8.82143	2237.06	9.66667	2252.9	7.25
2324.78	9.7386	2295.28	13.8678	2271.07	11.0625	2276.57	10.1	2263.18	8.48148	2259.79	9.34091	2267.95	12.5714	2276.83	13.1905	2289.31	63.625	2282.44	10.5625	2253.4	8.475	2247.68	10.325	2271.2	9.5	2227.67	7.57143	2197	10.15	2241.93	6.83929	2238.8	9.85417	2254.63	9.4625
2326.5	11.5502	2297	13.2126	2272.8	12.6875	2278.3	9.5	2264.91	9.93519	2261.52	10.1023	2269.68	9.42857	2278.56	11.2857	2291.04	63.6429	2284.16	10.0804	2255.14	10.7	2249.41	8.55	2272.93	8.08333	2229.41	11.3571	2198.75	9.9	2243.66	8.07143	2240.54	9.4375	2256.37	9.275
2328.21	12.8541	2298.72	13.6782	2274.53	9.75	2280.03	8.2	2266.64	9.81481	2263.25	10.0909	2271.41	10.3571	2280.29	13.381	2292.76	62.9107	2285.89	10.2411	2256.87	11.125	2251.15	8.85	2274.66	11.6667	2231.15	7.07143	2200.49	11	2245.4	9.19643	2242.27	9.52083	2258.1	9.775
2329.93	17.9179	2300.45	13.092	2276.26	9.4375	2281.75	10.25	2268.37	10.4444	2264.98	10.4886	2273.14	12.1667	2282.01	15.9524	2294.49	63.1339	2287.62	9.875	2258.6	11.225	2252.88	9.55	2276.39	11.5	2232.89	4.35714	2202.24	10.4125	2247.13	8.94643	2244.01	10.0417	2259.83	7.4125
2331.64	26.3495	2302.17	12.2989	2277.99	14.875	2283.48	10.2	2270.1	9.25	2266.71	10.0341	2274.87	12.5476	2283.74	13.8333	2296.21	64.7589	2289.34	10.0446	2260.33	9.375	2254.61	8.55	2278.11	8.58333	2234.63	7.42857	2203.98	11.9625	2248.87	9.07143	2245.74	8.5625	2261.56	8.6125
2333.36	37.2827	2303.89	14.9713	2279.71	10.0625	2285.21	7.05	2271.83	9.03704	2268.44	8.86364	2276.6	11.0238	2285.47	13.9048	2297.93	63.4464	2291.07	9.75	2262.06	11.325	2256.35	7.25	2279.84	10.5833	2236.36	10.0714	2205.72	11.1	2250.6	9.76786	2247.48	7.08333	2263.29	9.15
2335.07	32.7994	2305.61	13.1092	2281.44	9.375	2286.93	10.9	2273.56	9.53704	2270.17	9.125	2278.32	13.6667	2287.19	13.9524	2299.66	64.3482	2292.79	10.4911	2263.79	9.35	2258.08	9.025	2281.57	12.6667	2238.1	5.78571	2207.47	10.95	2252.33	9.10714	2249.21	10.4167	2265.02	7.8875
2336.79	19.9331	2307.33	14.9828	2283.17	12	2288.66	9.8	2275.29	10.7037	2271.9	9.31818	2280.05	11.619	2288.92	13.881	2301.38	64.9464	2294.51	10.1607	2265.52	8.725	2259.81	7.725	2283.29	10.9167	2239.83	6.5	2209.21	11.225	2254.07	8.08929	2250.94	8.58333	2266.75	7.15
2338.5	10.2857	2309.05	13.3333	2284.89	16.8125	2290.38	9.175	2277.02	8.77778	2273.63	10.1364	2281.78	7.64286	2290.64	11.1905	2303.1	63.1875	2296.24	10.7054	2267.25	9.725	2261.54	8.4	2285.02	7.33333	2241.57	8.78571	2210.95	8.7625	2255.8	10.3036	2252.68	8.16667	2268.48	8.5375
2340.22	9.69909	2310.77	14.3448	2286.62	13.75	2292.11	11	2278.74	8.49074	2275.35	8.92045	2283.5	9.57143	2292.37	11.9048	2304.82	63.7321	2297.96	10.5179	2268.98	11.175	2263.27	8.875	2286.75	11.8333	2243.31	10.5	2212.7	11.675	2257.53	10.1607	2254.41	10.4167	2270.21	6.9375
2341.93	9.5228	2312.49	12.9138	2288.34	13.9375	2293.83	9.925	2280.47	9.31481	2277.08	9.52273	2285.23	10.5476	2294.09	14.0952	2306.54	66.4732	2299.68	9.24107	2270.71	7.525	2265	7.4	2288.47	11.75	2245.04	9	2214.44	12.75	2259.26	8.69643	2256.14	8.66667	2271.94	7.2125
2343.64	9.90274	2314.21	13.6897	2290.07	15.125	2295.55	10.825	2282.2	9.14815	2278.81	9.15909	2286.96	12.3571	2295.81	15.4048	2308.26	62.9107	2301.41	8.79464	2272.44	10.25	2266.73	8.05	2290.2	9	2246.78	4.42857	2216.18	10.6125	2260.99	8.64286	2257.88	8.41667	2273.67	7.875
2345.36	10.0456	2315.93	13.7299	2291.79	12.5	2297.28	11.1	2283.92	8.24074	2280.54	8.89773	2288.68	9.47619	2297.54	12.5	2309.98	61.8125	2303.13	10.1161	2274.17	8.5	2268.46	7.825	2291.92	9.58333	2248.51	7.5	2217.92	10.25	2262.73	9.375	2259.61	8.5	2275.4	9.875
2347.07	9.71429	2317.65	15.5862	2293.52	9.375	2299	10.25	2285.65	10.5278	2282.26	8.22727	2290.41	12.2143	2299.26	15.7143	2311.7	64.7143	2304.85	9.26786	2275.9	11.55	2270.19	8.95	2293.65	11.4167	2250.24	10.2857	2219.66	11.3	2264.46	8.26786	2261.34	9.95833	2277.12	8.3375
2348.78	9.55623	2319.37	12.8736	2295.24	11.9375	2300.72	9.025	2287.38	9.47222	2283.99	10.6818	2292.13	13.2381	2300.98	12.0952	2313.42	64.1786	2306.57	10.0982	2277.63	11.2	2271.92	9.275	2295.37	9.58333	2251.98	8.64286	2221.4	11.325	2266.19	7.19643	2263.07	10.5417	2278.85	9.475
2350.49	9.82979	2321.09	14.2011	2296.97	11.75	2302.44	9.525	2289.1	9.36111	2285.72	9.15909	2293.85	10.6429	2302.7	11.0476	2315.14	62.2679	2308.29	9.86607	2279.35	10.725	2273.65	8.65	2297.09	9.5	2253.71	11.5714	2223.14	8.2875	2267.92	8.82143	2264.8	9.27083	2280.58	10.175
2352.2	9.54711	2322.8	13.6264	2298.69	12.9375	2304.17	11.525	2290.83	8.75926	2287.44	10	2295.58	13.0476	2304.43	11.8571	2316.86	63.8214	2310.01	10.6875	2281.08	9.125	2275.38	9.25	2298.82	11.8333	2255.44	11.5	2224.88	10.2375	2269.65	8.05357	2266.53	8.6875	2282.31	8.725
2353.91	10.7295	2324.52	14.7356	2300.41	12.75	2305.89	8.725	2292.55	10.4259	2289.17	10.5909	2297.3	13.3095	2306.15	11.4048	2318.58	66.5982	2311.73	9.44643	2282.81	8.35	2277.11	8.525	2300.54	10.8333	2257.18	11.1429	2226.62	10.275	2271.38	11.0714	2268.26	8.125	2284.03	8.1
2355.62	9.99392	2326.24	14.5517	2302.13	9.3125	2307.61	9.975	2294.27	11.1944	2290.89	11.1932	2299.02	13.7381	2307.87	13.5	2320.3	63.9196	2313.45	10.6339	2284.53	10.775	2278.83	8.025	2302.26	10.0833	2258.91	7.71429	2228.36	10.2875	2273.1	7.80357	2269.99	8.875	2285.76	8.575
2357.33	10.921	2327.95	17.7874	2303.86	14.8125	2309.33	10.825	2296	9.21296	2292.62	10.2727	2300.75	11.6667	2309.59	11.4762	2322.02	62.7857	2315.17	10.0714	2286.26	10.325	2280.56	6.9	2303.98	15.25	2260.64	5.07143	2230.1	10.2625	2274.83	9.91071	2271.72	9	2287.48	8.225
2359.04	10.386	2329.67	19.2299	2305.58	10.75	2311.05	10.325	2297.72	9.37963	2294.34	11.4432	2302.47	12.0476	2311.31	12.1429	2323.73	65.1161	2316.89	11.6071	2287.99	10.025	2282.29	7.875	2305.7	12.8333	2262.37	7.78571	2231.84	11.4375	2276.56	6.48214	2273.45	11.3333	2289.21	7.8875
2360.75	10.3191	2331.39	31.5977	2307.3	14.125	2312.77	12.3	2299.44	10.1019	2296.06	10.0909	2304.19	13.0238	2313.03	15.5238	2325.45	65.9732	2318.61	9.83929	2289.71	9.55	2284.01	8.5	2307.42	10.75	2264.1	6.64286	2233.57	10.5875	2278.29	7.39286	2275.18	8.5	2290.93	8.2625
2362.46	10.5167	2333.1	41.6034	2309.02	11.875	2314.49	13.05	2301.17	10.1667	2297.79	11.4659	2305.91	12.1905	2314.75	14.8095	2327.17	65.1964	2320.33	10.4375	2291.43	10.975	2285.74	6.975	2309.14	11.3333	2265.83	6.28571	2235.31	10.075	2280.02	9.125	2276.9	8.27083	2292.66	11.5125
2364.17	10.0182	2334.82	42.6552	2310.74	7.875	2316.21	10.95	2302.89	11.3611	2299.51	10.4091	2307.63	12.8571	2316.47	14.5714	2328.88	69.8125	2322.04	9.375	2293.16	10.175	2287.46	8	2310.87	10.25	2267.56	7.71429	2237.05	9.0875	2281.74	10.5	2278.63	12.8333	2294.38	9.075
2365.88	9.05471	2336.53	29.0057	2312.46	12.875	2317.93	11.975	2304.61	9.12963	2301.23	8.98864	2309.35	13.7619	2318.18	13.7381	2330.6	78.2768	2323.76	11.1875	2294.88	9.425	2289.19	8.275	2312.59	14.4167	2269.29	6.57143	2238.78	10.225	2283.47	9.16071	2280.36	9.89583	2296.11	7.1625
2367.58	9.27052	2338.25	16.4023	2314.18	12.6875	2319.65	10.45	2306.33	8.42593	2302.95	8.43182	2311.07	12.1429	2319.9	13.0476	2332.31	92.25	2325.48	11.5536	2296.61	11.525	2290.91	7.7	2314.3	11.4167	2271.02	7.14286	2240.52	9.2125	2285.19	9.125	2282.09	10.3958	2297.83	8.475
2369.29	10.1459	2339.96	13.431	2315.9	5.875	2321.36	12.5	2308.05	8.57407	2304.68	9.86364	2312.79	13.7619	2321.62	15.4762	2334.03	99.0089	2327.19	12.7411	2298.33	10.675	2292.64	7.6	2316.02	12.4167	2272.75	5.71429	2242.26	11.1875	2286.92	9.76786	2283.81	7.16667	2299.55	10.2625
2371	10.6444	2341.67	15.2471	2317.62	10.125	2323.08	9.35	2309.77	9.82407	2306.4	9.88636	2314.51	12.3333	2323.34	16.2619	2335.74	89.8661	2328.91	15.9643	2300.05	9.325	2294.36	11.2	2317.74	10.5833	2274.48	9.57143	2243.99	11.6625	2288.65	7.96429	2285.54	7.10417	2301.27	10.1625
2372.7	9.96049	2343.39	13.9483	2319.33	12.125	2324.8	9.375	2311.49	9.99074	2308.12	10.6705	2316.23	12.4524	2325.05	13.2143	2337.46	70.7321	2330.63	23.7589	2301.77	10.95	2296.09	5.5	2319.46	6.25	2276.21	9.21429	2245.73	10.65	2290.37	8.35714	2287.26	8.8125	2303	8.9375
2374.41	10.3647	2345.1	14.7414	2321.05	10.8125	2326.51	9.55	2313.21	8.64815	2309.84	10.2273	2317.95	9.35714	2326.77	14.3333	2339.17	63.4643	2332.34	36.4018	2303.5	12.275	2297.81	8.725	2321.18	9.33333	2277.93	7.07143	2247.46	9.3875	2292.09	10.3929	2288.99	9.27083	2304.72	9.6875
2376.12	9.71429	2346.81	13.431	2322.77	8.375	2328.23	10.75	2314.93	9.96296	2311.56	9.59091	2319.67	12.3571	2328.49	19.0476	2340.89	64.4107	2334.06	39.1607	2305.22	10.425	2299.53	9	2322.9	10.4167	2279.66	11.2143	2249.2	11.875	2293.82	9.46429	2290.71	11.6042	2306.44	9.375
2377.82	10.1125	2348.52	14.6897	2324.49	10.75	2329.95	18.225	2316.65	8.81481	2313.28	9.375	2321.39	13.7143	2330.2	24.5476	2342.6	63.8304	2335.77	26.6696	2306.94	10.775	2301.25	9.6	2324.61	12	2281.39	7.14286	2250.93	10.1625	2295.54	9.21429	2292.44	9.58333	2308.16	8.25
2379.53	10.2584	2350.23	13.9598	2326.2	13.6875	2331.66	29.225	2318.37	9.18519	2315	10.4318	2323.1	13.0476	2331.92	37.0714	2344.31	63.7321	2337.48	12.8482	2308.66	10.025	2302.98	9.6	2326.33	8.33333	2283.11	8.42857	2252.66	9.7125	2297.27	9.08929	2294.16	11.125	2309.88	10.4625
2381.23	10.4164	2351.94	13.6609	2327.92	7.5625	2333.38	39.15	2320.09	9.93519	2316.72	11.2386	2324.82	13.5238	2333.63	41.5	2346.02	65.3304	2339.2	9.83929	2310.38	9.625	2304.7	8.275	2328.05	14.25	2284.84	10.2143	2254.4	9.975	2298.99	10.1964	2295.89	9.375	2311.6	8.4875
2382.94	10.7568	2353.65	14.1954	2329.64	15.8125	2335.09	34.125	2321.81	11.25	2318.43	9.60227	2326.54	13.7619	2335.35	34.5714	2347.74	63.5446	2340.91	10.4911	2312.1	7.675	2306.42	9.425	2329.76	18.5833	2286.57	8.57143	2256.13	10.9125	2300.71	9.96429	2297.61	10.4792	2313.32	7.675
2384.64	10.9878	2355.37	15.0977	2331.35	32.25	2336.81	19.475	2323.52	9.78704	2320.15	10.4318	2328.25	16.2857	2337.06	19.9048	2349.45	63.5625	2342.63	11.2946	2313.82	8.875	2308.14	8.875	2331.48	29.5	2288.29	4.35714	2257.86	10.1375	2302.43	8.42857	2299.33	10.0833	2315.04	8.55
2386.34	10.2948	2357.08	12.8046	2333.07	42.375	2338.52	9.175	2325.24	9.68519	2321.87	10.9545	2329.97	23.5714	2338.78	13.9048	2351.16	62.8482	2344.34	11.5357	2315.54	9.975	2309.86	8.075	2333.19	45.9167	2290.02	8.21429	2259.59	10.2	2304.15	9.28571	2301.05	8.83333	2316.76	9.9125
2388.05	11.1307	2358.78	15.4655	2334.78	38.0625	2340.23	9	2326.96	9.77778	2323.59	10.5227	2331.68	35.1429	2340.49	14.3571	2352.87	65.4732	2346.05	11.4554	2317.26	9.975	2311.58	9.125	2334.91	41.5833	2291.74	7.5	2261.32	8.7	2305.88	9.98214	2302.78	8.875	2318.48	7.8875
2389.75	10.6231	2360.49	13.5632	2336.5	20.8125	2341.95	8.85	2328.67	13.4259	2325.31	10.5227	2333.4	49.1905	2342.2	13.9286	2354.58	65.5536	2347.76	10.7946	2318.98	11.475	2313.3	7.9	2336.62	25.5	2293.46	6.35714	2263.05	10.8625	2307.6	8.98214	2304.5	10.7917	2320.19	7.9625
2391.45	11.0334	2362.2	14.523	2338.21	12.4375	2343.66	11.175	2330.39	17.787	2327.02	13.375	2335.11	39.5	2343.92	14.6667	2356.29	66.5625	2349.47	9.46429	2320.69	10.6	2315.02	8.775	2338.34	14.8333	2295.19	5.78571	2264.79	9.175	2309.32	9.25	2306.22	9.60417	2321.91	10.425
2393.15	10.8754	2363.91	15.0575	2339.93	7.4375	2345.37	8.475	2332.11	30.0093	2328.74	15.5114	2336.83	22.8571	2345.63	14.5952	2358	64.0804	2351.18	10.7143	2322.41	10.65	2316.74	9.425	2340.05	11.8333	2296.91	6.85714	2266.52	10.525	2311.04	8.625	2307.94	8.4375	2323.63	8.775
2394.85	10.7295	2365.62	13.4885	2341.64	12.3125	2347.09	11.725	2333.82	35.6944	2330.45	21	2338.54	10.619	2347.34	13.5952	2359.71	66.6964	2352.9	11.3839	2324.13	11.1	2318.46	8.3	2341.76	14.8333	2298.63	8.42857	2268.25	9.8125	2312.76	10.4643	2309.66	9.20833	2325.35	8.725
2396.55	10.5441	2367.33	14.7184	2343.35	12.375	2348.8	8.05	2335.54	27.4074	2332.17	32.4205	2340.26	11.5	2349.05	14.9524	2361.42	65.6518	2354.61	10.9375	2325.85	12.075	2320.18	7.2	2343.48	13.0833	2300.36	7.71429	2269.97	10.875	2314.48	7.92857	2311.38	7.52083	2327.06	11.9375
2398.26	10.9605	2369.03	15.3333	2345.06	13.25	2350.51	9	2337.25	14.8704	2333.88	37.3409	2341.97	11.0238	2350.76	15.4048	2363.13	64.9554	2356.32	9.3125	2327.56	14.675	2321.89	9.825	2345.19	13.75	2302.08	5.78571	2271.7	9.65	2316.2	8.39286	2313.1	9.02083	2328.78	11.875
2399.96	10.1398	2370.74	13.908	2346.78	9.875	2352.22	10.725	2338.96	9.73148	2335.6	30.8636	2343.68	8.57143	2352.47	12.5476	2364.83	64.8571	2358.03	10.1607	2329.28	16.25	2323.61	7.7	2346.9	14.9167	2303.8	9.21429	2273.43	9.95	2317.91	7.625	2314.82	10.3333	2330.5	17.5
2401.66	11.0821	2372.45	15.2299	2348.49	12.875	2353.93	9.525	2340.68	10.3704	2337.31	13.4545	2345.4	13.4048	2354.19	14.9286	2366.54	65.6429	2359.73	9.44643	2330.99	24.825	2325.33	8.975	2348.61	17.9167	2305.52	8.28571	2275.16	10.3	2319.63	10.1607	2316.54	9.04167	2332.21	29.4875
2403.36	11.0669	2374.15	15.3276	2350.2	11.6875	2355.64	10.95	2342.39	7.62963	2339.03	11.7159	2347.11	10.2143	2355.9	15.8333	2368.25	65.1518	2361.44	10	2332.71	39.475	2327.04	8.2	2350.33	17.8333	2307.24	10.3571	2276.89	10.1625	2321.35	8.03571	2318.26	8.04167	2333.93	37.2625
2405.05	11.3222	2375.86	14.4023	2351.91	6	2357.35	8.475	2344.1	10.4352	2340.74	9.95455	2348.82	12.3095	2357.6	14.381	2369.96	65.7679	2363.15	9.66964	2334.42	41.425	2328.76	12.175	2352.04	12.1667	2308.96	9.78571	2278.62	10.7625	2323.07	8.89286	2319.98	9.29167	2335.64	27.8875
2406.75	10.3465	2377.56	14.7471	2353.62	10.0625	2359.06	9.125	2345.82	9.5	2342.45	9.68182	2350.53	11.5238	2359.31	14.4762	2371.66	65.6339	2364.86	11	2336.14	27.525	2330.48	18.875	2353.75	9.41667	2310.68	8.21429	2280.34	10.175	2324.79	10.4643	2321.69	10.1458	2337.36	12.1625
2408.45	10.8116	2379.27	14.2816	2355.33	10.1875	2360.77	9.5	2347.53	10.2778	2344.17	10.8523	2352.24	10.0238	2361.02	14.8571	2373.37	65.5804	2366.57	10.4196	2337.85	14.975	2332.19	28.925	2355.46	9.5	2312.4	10.3571	2282.07	8.8625	2326.5	11.7143	2323.41	10.8333	2339.07	11.175
2410.15	11.1398	2380.97	14.6954	2357.04	13.75	2362.48	12.475	2349.24	9.62037	2345.88	12.6932	2353.95	11.5	2362.73	13.0714	2375.07	64.4286	2368.28	11.1964	2339.57	9.625	2333.91	36.575	2357.17	18.8333	2314.12	7.42857	2283.8	10.8875	2328.22	11.3393	2325.13	9.875	2340.78	9.5875
2411.85	11.0912	2382.68	15.9195	2358.75	12.75	2364.19	11.775	2350.95	10.3056	2347.59	11.6136	2355.66	12.2619	2364.44	14.1667	2376.78	66.3482	2369.98	12.2143	2341.28	8.1	2335.62	29.325	2358.88	9.5	2315.84	7.21429	2285.52	10.425	2329.93	15.1607	2326.85	10.9375	2342.5	9.25
2413.54	11.4498	2384.38	15.3966	2360.46	17.625	2365.89	11.5	2352.66	10.0833	2349.3	12.1136	2357.37	10.9286	2366.15	14.7857	2378.49	63.6607	2371.69	11.5268	2342.99	9.625	2337.34	9.35	2360.59	15.25	2317.56	4.5	2287.25	11.1375	2331.65	26.2321	2328.56	15.1042	2344.21	10.125
2415.24	12	2386.09	16.3046	2362.17	7.5625	2367.6	7.775	2354.37	9.61111	2351.01	10.6932	2359.08	13.2381	2367.86	14.2857	2380.19	65.6607	2373.4	10.4732	2344.71	11.475	2339.05	6.2	2362.29	11.4167	2319.28	6.5	2288.97	10.3125	2333.37	35.3929	2330.28	19.9167	2345.92	9.4875
2416.94	10.9483	2387.79	15	2363.88	12.9375	2369.31	13.05	2356.08	9.87037	2352.73	11.1591	2360.79	11.4524	2369.56	15.619	2381.89	65.6786	2375.1	11.8482	2346.42	10.3	2340.76	9.7	2364	17.25	2321	6.64286	2290.7	11.1125	2335.08	31.5179	2331.99	33.0208	2347.63	8.7375
2418.63	11.6565	2389.49	15.2874	2365.59	12.75	2371.02	8.85	2357.79	11.5648	2354.44	9.68182	2362.5	15.0952	2371.27	16.9286	2383.6	68.3571	2376.81	11.4018	2348.13	11.825	2342.48	8.2	2365.71	10.9167	2322.72	7.64286	2292.42	10.0375	2336.79	17.8571	2333.71	41.5	2349.34	10.3125
2420.33	11.845	2391.19	16.8736	2367.29	13.5	2372.72	10.75	2359.5	9.9537	2356.15	10.5114	2364.21	11.8571	2372.98	17.8095	2385.3	65.0714	2378.51	11.3393	2349.84	7.875	2344.19	12.3	2367.42	12.6667	2324.43	3.92857	2294.15	10.9125	2338.51	10.8571	2335.42	35.2083	2351.06	10.9875
2422.03	12.0669	2392.9	14.4138	2369	10.1875	2374.43	13.55	2361.21	10.3611	2357.86	9.68182	2365.92	11.3333	2374.68	16.1667	2387.01	66.7857	2380.22	10.1875	2351.55	9.125	2345.9	7.725	2369.13	9.5	2326.15	11.2143	2295.87	12.4625	2340.22	10.4643	2337.14	18.3125	2352.77	7.525
2423.72	11.5897	2394.6	15.4195	2370.71	13.5	2376.13	14	2362.92	10.3333	2359.57	10.9886	2367.62	12.3571	2376.39	17	2388.71	67.2946	2381.92	12.4107	2353.26	8.9	2347.61	8.875	2370.83	13.9167	2327.87	9.57143	2297.59	11.6125	2341.94	10.2143	2338.85	10.125	2354.48	7.325
2425.42	11.6231	2396.3	16.7644	2372.41	14.25	2377.84	9.6	2364.63	11.2963	2361.27	10.5568	2369.33	12.6667	2378.09	15.5238	2390.41	64.8571	2383.62	12.1429	2354.97	7.875	2349.32	9.975	2372.54	10.25	2329.58	12.7857	2299.32	10.15	2343.65	9.08929	2340.56	9.64583	2356.19	9.975
2427.11	11.2553	2398	15.6667	2374.12	5.4375	2379.54	11.1	2366.34	11.2778	2362.98	11.5455	2371.04	12.3095	2379.8	16.6667	2392.11	64.5536	2385.33	12.0982	2356.68	11.675	2351.04	7.7	2374.24	14.8333	2331.3	19.4286	2301.04	9.6875	2345.36	9.66071	2342.28	10.5833	2357.9	10.125
2428.8	12.3435	2399.7	16.2816	2375.83	16.0625	2381.25	9.875	2368.04	10.1667	2364.69	11.3864	2372.74	13.7619	2381.5	14.2857	2393.81	68.3393	2387.03	11.4196	2358.39	11.275	2352.75	7.6	2375.95	13.5833	2333.01	32.1429	2302.76	9.8875	2347.07	10.2143	2343.99	9.66667	2359.61	7.4875
2430.5	11.0456	2401.4	14.6092	2377.53	14.375	2382.95	13.375	2369.75	9.26852	2366.4	11.5227	2374.45	13.381	2383.2	13.9762	2395.52	69.1429	2388.73	11.0089	2360.1	10.425	2354.46	6.575	2377.66	9.91667	2334.73	38.8571	2304.48	12.4625	2348.79	8	2345.7	9.9375	2361.32	7.35
2432.19	12.9909	2403.1	15.931	2379.24	9.625	2384.66	11.525	2371.46	10.1667	2368.11	9.93182	2376.15	12.6667	2384.91	16.5	2397.22	63.8214	2390.44	9.60714	2361.81	11.075	2356.17	8.175	2379.36	8.16667	2336.44	19.5	2306.2	8.4875	2350.5	9.82143	2347.42	9.66667	2363.02	9.8375
2433.88	11.693	2404.8	16.546	2380.94	11.3125	2386.36	10.625	2373.16	10.1296	2369.81	10.8977	2377.86	14.2619	2386.61	12.9762	2398.92	64.9464	2392.14	12.125	2363.52	10.7	2357.88	9.55	2381.07	10.5	2338.16	10.6429	2307.92	8.8125	2352.21	9.23214	2349.13	11.2708	2364.73	9.6
2435.58	12.617	2406.5	14.9195	2382.65	15.1875	2388.06	11.725	2374.87	10.7778	2371.52	10.4318	2379.56	13	2388.31	13.3571	2400.62	67.1071	2393.84	12.2232	2365.23	10	2359.59	9.85	2382.77	11.3333	2339.87	6.35714	2309.65	8.925	2353.92	10.9464	2350.84	10.7083	2366.44	7.5625
2437.27	13.6231	2408.2	16.7586	2384.35	13.5	2389.77	11.525	2376.57	9.22222	2373.23	11.8864	2381.27	11.1667	2390.02	16.881	2402.32	68.4375	2395.54	10.7232	2366.94	10.175	2361.3	10.65	2384.47	15.4167	2341.58	9	2311.37	10.225	2355.63	9.44643	2352.55	9.83333	2368.15	9.6375
2438.96	13.7447	2409.89	17.2701	2386.05	9.4375	2391.47	11.65	2378.28	9.39815	2374.93	10.6705	2382.97	14.2619	2391.72	15.5	2404.02	67.0982	2397.24	11.9732	2368.64	13.325	2363	9.625	2386.18	13.25	2343.3	7.28571	2313.09	9.9	2357.34	12.4464	2354.26	10.4583	2369.85	8.1
2440.65	14.3009	2411.59	16.592	2387.76	11.3125	2393.17	12.85	2379.98	9.94444	2376.64	10.8409	2384.68	12.9286	2393.42	15.6905	2405.72	65.4375	2398.94	11.8036	2370.35	9.675	2364.71	7.975	2387.88	9.58333	2345.01	5.14286	2314.8	11.3	2359.05	9.30357	2355.97	9.3125	2371.56	8.425
2442.34	15.5805	2413.29	17.2701	2389.46	11.875	2394.87	10.125	2381.69	9.66667	2378.34	9.32955	2386.38	15.8333	2395.12	16.5952	2407.41	67.4464	2400.64	11.7232	2372.06	9.5	2366.42	7.675	2389.58	8.33333	2346.72	8	2316.52	11.7	2360.76	10.3929	2357.68	9.52083	2373.27	9.575
2444.03	15.8116	2414.99	16.3678	2391.16	11.625	2396.57	11.05	2383.39	8.75926	2380.05	11.3636	2388.08	15.8333	2396.82	11.5714	2409.11	65.9911	2402.34	11.3929	2373.76	12.6	2368.13	7.975	2391.28	7.33333	2348.43	6.92857	2318.24	10.45	2362.47	10.5179	2359.39	9.85417	2374.97	9.075
2445.72	17.921	2416.68	15.9885	2392.86	14.0625	2398.27	10.5	2385.1	11.5	2381.75	12.0909	2389.79	14.0238	2398.52	15.881	2410.81	68.9821	2404.04	12.0089	2375.47	9.225	2369.83	8.5	2392.99	18.8333	2350.14	6.92857	2319.96	11.4625	2364.17	10.1607	2361.1	11	2376.68	7.1875
2447.41	19.3435	2418.38	18.1322	2394.56	17.625	2399.97	13.35	2386.8	9.23148	2383.46	11.0455	2391.49	14.8095	2400.22	14.5952	2412.51	65.5893	2405.74	13.0179	2377.17	8.875	2371.54	9.95	2394.69	11.9167	2351.86	5.71429	2321.68	10.55	2365.88	7.51786	2362.81	11.1042	2378.38	9.6125
2449.1	20.9787	2420.07	16.2471	2396.27	13.125	2401.67	12.75	2388.5	10.2778	2385.16	11.9318	2393.19	13.5	2401.92	16.5476	2414.2	66.1696	2407.44	11.125	2378.88	12.25	2373.25	9.8	2396.39	10.9167	2353.57	8.21429	2323.4	10.875	2367.59	11.4286	2364.52	8.70833	2380.09	11.025
2450.79	23.1489	2421.77	17.0632	2397.97	19.25	2403.37	11.25	2390.21	9.4537	2386.86	13.0682	2394.89	14.6667	2403.62	16.6905	2415.9	66.2679	2409.14	12.8125	2380.58	11.15	2374.95	8.375	2398.09	9.5	2355.28	8.64286	2325.11	12.3	2369.3	7.83929	2366.22	10.0208	2381.79	10.1
2452.48	25.5502	2423.46	18.7241	2399.67	12.375	2405.07	12.35	2391.91	12.7037	2388.57	11.1591	2396.59	15.5476	2405.32	15.5	2417.6	66.9286	2410.84	12.5357	2382.29	9.525	2376.66	10.2	2399.79	13.0833	2356.99	6.71429	2326.83	10.775	2371	8.26786	2367.93	10.6667	2383.5	8.25
2454.17	27.0912	2425.16	16.8218	2401.37	18.8125	2406.77	11.4	2393.61	12.0093	2390.27	11.3864	2398.29	12.2857	2407.02	16.1429	2419.29	65.3839	2412.53	12.9464	2383.99	10.875	2378.36	8.925	2401.49	8.33333	2358.7	4.57143	2328.55	13.725	2372.71	10.5714	2369.64	12.2708	2385.2	10.675
2455.86	29.6991	2426.85	17.8333	2403.07	9.375	2408.47	12.175	2395.31	9.9537	2391.97	11.2841	2399.99	14.0476	2408.72	16.2143	2420.99	65.9821	2414.23	12.125	2385.7	10.325	2380.07	9.125	2403.19	15.9167	2360.4	8.5	2330.26	21.8	2374.42	9.73214	2371.34	10.3958	2386.9	8.2125
2457.54	29.5198	2428.55	16.431	2404.77	14.375	2410.17	12.425	2397.01	9.58333	2393.67	10.6023	2401.69	12.4762	2410.42	13.8571	2422.68	66.8482	2415.93	12.6964	2387.4	9.9	2381.77	6.975	2404.89	11.1667	2362.11	7.07143	2331.98	34.875	2376.12	8.71429	2373.05	12.4167	2388.61	7.85
2459.23	29.1611	2430.24	20.0517	2406.46	13.9375	2411.86	11.3	2398.71	10.287	2395.37	11.4318	2403.39	14.3095	2412.11	16.5	2424.38	71.3393	2417.62	13.0179	2389.1	11.4	2383.48	9.475	2406.59	10.25	2363.82	9.64286	2333.69	43.2625	2377.83	10.5893	2374.76	9.08333	2390.31	8.275
2460.92	28.9939	2431.93	18.4023	2408.16	12.5625	2413.56	12.7	2400.41	10.6667	2397.07	12.8864	2405.09	13.9524	2413.81	17.0952	2426.07	65.7857	2419.32	12.0089	2390.8	12.5	2385.18	10.525	2408.29	11.4167	2365.53	3.28571	2335.41	34.6	2379.53	9.69643	2376.46	10.4792	2392.01	10.4
2462.6	27.9119	2433.63	19.1609	2409.86	14.6875	2415.26	13.125	2402.11	11.6481	2398.78	13.7045	2406.79	13.3571	2415.51	15.9762	2427.77	69.125	2421.01	11.1429	2392.51	13.175	2386.88	9.5	2409.98	18.5833	2367.24	9.78571	2337.12	19.5	2381.24	10.2679	2378.17	9.1875	2393.71	9.2125
2464.29	26.0699	2435.32	19.1897	2411.56	15.75	2416.96	11.475	2403.81	10.6759	2400.48	10.9545	2408.49	13.3333	2417.2	16.9048	2429.46	68.5268	2422.71	12.1339	2394.21	10.15	2388.59	8.675	2411.68	17.5	2368.94	11.9286	2338.84	13.35	2382.94	8.60714	2379.87	10.9167	2395.41	7.9625
2465.97	25.5775	2437.01	20.9655	2413.26	19.125	2418.65	13.325	2405.51	10.1481	2402.18	10.4545	2410.19	15.5714	2418.9	15.4286	2431.15	68.3929	2424.4	12.8393	2395.91	11.875	2390.29	8.375	2413.38	12.5833	2370.65	6.21429	2340.55	8.925	2384.64	10.9286	2381.58	9.6875	2397.11	9.1875
2467.66	23.2796	2438.7	21.8046	2414.95	14.125	2420.35	10.7	2407.21	11.4352	2403.87	11.7727	2411.88	12.4286	2420.6	15.5952	2432.85	66.4464	2426.1	13.1339	2397.61	9.95	2391.99	7.75	2415.08	10	2372.36	7.92857	2342.26	9.3125	2386.35	10.2857	2383.28	9	2398.82	9.5625
2469.34	23.1611	2440.39	23.592	2416.65	13.1875	2422.04	13.025	2408.91	11.4259	2405.57	11.3182	2413.58	13.1667	2422.29	18.1429	2434.54	68.6071	2427.79	12.4554	2399.31	11.55	2393.69	8.45	2416.77	10.4167	2374.06	8.92857	2343.98	11.6	2388.05	9.07143	2384.98	10.0208	2400.52	7.975
2471.03	21.2492	2442.09	23.9483	2418.35	17.5625	2423.74	12.625	2410.61	11.2407	2407.27	10.6023	2415.28	17.0952	2423.99	17.5238	2436.23	68.2857	2429.49	11.3482	2401.01	10.5	2395.39	10.775	2418.47	15.3333	2375.77	8.57143	2345.69	11.6375	2389.75	7.875	2386.69	9.39583	2402.22	8.225
2472.71	20.8754	2443.78	25.4943	2420.04	15.1875	2425.43	14.275	2412.3	11.5463	2408.97	11.7045	2416.97	13.4286	2425.68	16.9048	2437.92	69.3661	2431.18	12.2143	2402.71	13.4	2397.09	8.125	2420.16	14.8333	2377.48	7.14286	2347.4	11.15	2391.45	8.625	2388.39	11.0417	2403.91	9.8125
2474.4	19.5106	2445.47	26.4138	2421.74	14.3125	2427.13	16.65	2414	11.213	2410.67	12.2727	2418.67	14.3333	2427.38	18.5476	2439.62	69.6964	2432.87	13.3214	2404.41	10.7	2398.79	8.825	2421.86	14.8333	2379.18	7.92857	2349.11	11.225	2393.16	9.5	2390.09	9.4375	2405.61	9.15
2476.08	20.31	2447.16	27.2241	2423.43	15.75	2428.82	16.65	2415.7	12.3704	2412.37	11.7159	2420.37	12.619	2429.07	20.1429	2441.31	71.6429	2434.56	13.6071	2406.11	12.025	2400.5	7.275	2423.56	12.5	2380.88	10.4286	2350.82	10.6375	2394.86	8.91071	2391.8	9.125	2407.31	8.35
2477.76	19.0973	2448.85	29.569	2425.13	13.4375	2430.51	15.425	2417.39	10.8056	2414.06	12.3068	2422.06	13.8333	2430.76	18.2143	2443	68.9196	2436.26	15.7589	2407.81	11.85	2402.19	10.075	2425.25	14.25	2382.59	9.35714	2352.53	9.7625	2396.56	9.44643	2393.5	10.1042	2409.01	10.7875
2479.45	19.7021	2450.53	31.8218	2426.82	12.375	2432.21	14.025	2419.09	10.6852	2415.76	11.2841	2423.76	15.7619	2432.46	20	2444.69	71.2411	2437.95	15.8214	2409.51	11	2403.89	12.6	2426.94	17.6667	2384.29	10.4286	2354.24	10.3625	2398.26	10.625	2395.2	9.58333	2410.71	10.8125
2481.13	17.0274	2452.22	34.2299	2428.52	11.125	2433.9	18.075	2420.79	10.963	2417.46	12.1591	2425.45	13.5476	2434.15	18.6667	2446.38	71.6607	2439.64	17.3571	2411.2	7.975	2405.59	7.65	2428.64	13.1667	2386	9.92857	2355.95	10.75	2399.96	11.9286	2396.9	10.7708	2412.41	7.8
2482.81	17.7751	2453.91	34.2356	2430.21	17	2435.59	16.975	2422.48	10.7315	2419.15	10.625	2427.15	14.9286	2435.84	21.3333	2448.07	71.1607	2441.33	16.7054	2412.9	9.725	2407.29	12.375	2430.33	12.5833	2387.7	8.85714	2357.66	10.65	2401.66	10.1071	2398.6	12.3333	2414.1	9.4375
2484.49	16.6383	2455.6	34.2126	2431.9	17.25	2437.28	21.075	2424.18	10.2037	2420.85	12.6818	2428.84	13.0238	2437.53	21.5952	2449.76	72.6339	2443.02	17.4286	2414.6	11.325	2408.99	9.675	2432.03	13.8333	2389.4	10.7143	2359.37	10.95	2403.36	7.78571	2400.3	9.89583	2415.8	11.825
2486.17	16.7234	2457.29	34.3908	2433.6	14.8125	2438.98	19.225	2425.87	12.6852	2422.54	13.2273	2430.53	12.5952	2439.22	21.381	2451.45	78	2444.71	18.7679	2416.29	10	2410.69	9.625	2433.72	11.6667	2391.1	12.5714	2361.08	10.2875	2405.06	9.67857	2402	9.52083	2417.5	8.8625
2487.85	16.5927	2458.97	34.1897	2435.29	24.9375	2440.67	23.1	2427.57	10.1852	2424.24	14.2727	2432.23	14.6905	2440.91	22.1905	2453.13	77.3036	2446.4	21.0357	2417.99	12.675	2412.39	10.975	2435.41	16.4167	2392.81	8.85714	2362.79	9.8625	2406.76	10.2143	2403.7	10.0208	2419.19	8.9875
2489.53	16.5775	2460.66	34.2414	2436.98	20.625	2442.36	23.15	2429.26	11.75	2425.93	13.2614	2433.92	13.9048	2442.61	22.6667	2454.82	77.2143	2448.09	21.1607	2419.69	12.1	2414.08	7.9	2437.1	18.9167	2394.51	9.42857	2364.5	10.975	2408.46	10.875	2405.4	11.0833	2420.89	10.2875
2491.21	14.6018	2462.35	30.8678	2438.67	21.4375	2444.05	24.275	2430.95	12.0463	2427.63	13.4545	2435.61	15.2381	2444.3	28.5476	2456.51	78.5357	2449.78	23.3214	2421.38	11.8	2415.78	10.05	2438.79	17.3333	2396.21	14.3571	2366.21	11.325	2410.15	9.44643	2407.1	11	2422.58	10.325
2492.89	15.6717	2464.03	32.0632	2440.36	21.4375	2445.74	26.375	2432.65	10.6481	2429.32	14.5568	2437.3	17.3571	2445.99	32.1905	2458.2	80.5893	2451.47	27.8839	2423.08	11.375	2417.48	10.45	2440.49	10.6667	2397.91	10.5714	2367.92	11.2875	2411.85	11.6429	2408.8	12.2708	2424.28	9.3
2494.57	14.8085	2465.72	30.8391	2442.05	25	2447.43	28.4	2434.34	11.7037	2431.01	13.5795	2438.99	14.5238	2447.68	33.7619	2459.88	80.9554	2453.16	29.0625	2424.77	8.875	2419.17	11.525	2442.18	16.8333	2399.61	10.2857	2369.62	10.925	2413.55	10.6786	2410.49	10.875	2425.97	13.0875
2496.25	14.8389	2467.4	30.069	2443.74	23.4375	2449.12	30.025	2436.03	12.6204	2432.71	14.3068	2440.69	19	2449.36	37.3095	2461.57	80.1964	2454.85	30.0714	2426.47	12.125	2420.87	11.125	2443.87	16.5833	2401.31	10.4286	2371.33	9.4125	2415.25	13.1786	2412.19	10.375	2427.67	12.0875
2497.93	14.9878	2469.09	26.6034	2445.43	31.625	2450.81	32.65	2437.72	13.5648	2434.4	13.2614	2442.38	17.2619	2451.05	43.0476	2463.26	80.8482	2456.53	31.6071	2428.16	12.9	2422.56	7.925	2445.56	17.5833	2403.01	10.8571	2373.04	11.875	2416.94	9.44643	2413.89	10.125	2429.36	9.675
2499.61	14.8663	2470.77	27.8276	2447.12	39.3125	2452.5	28.65	2439.41	13.6019	2436.09	14.625	2444.07	19.9762	2452.74	46.6667	2464.94	79.8482	2458.22	30.9375	2429.85	12.375	2424.26	10.425	2447.25	16.25	2404.71	10.4286	2374.74	11.8625	2418.64	10.875	2415.59	10.4375	2431.05	11.1125
2501.29	14.6049	2472.46	27.2414	2448.81	34.875	2454.18	27.9	2441.11	13.8519	2437.78	15.8523	2445.76	17.9524	2454.43	49.2381	2466.63	77.0714	2459.91	31.3036	2431.55	12.375	2425.95	9.925	2448.94	20	2406.41	4.35714	2376.45	10.8375	2420.33	9	2417.28	12.75	2432.75	11.2
2502.96	13.772	2474.14	25.7931	2450.5	42.5	2455.87	29.55	2442.8	14.4167	2439.48	16.3636	2447.45	20.0238	2456.12	52.9286	2468.31	80.1964	2461.59	30.5625	2433.24	11.7	2427.65	9.825	2450.63	20.6667	2408.11	9.35714	2378.15	10.3125	2422.03	11.9286	2418.98	11.625	2434.44	10.6875
2504.64	13.5198	2475.82	25.5632	2452.19	46.3125	2457.56	27.3	2444.49	13.8426	2441.17	17.2386	2449.14	22.4286	2457.81	57.2143	2470	77.7411	2463.28	30.2768	2434.93	9.975	2429.34	8.5	2452.31	17.4167	2409.8	10.2857	2379.86	12	2423.72	9	2420.67	12.2917	2436.13	10.175
2506.32	14.304	2477.51	24.7874	2453.88	43.3125	2459.25	24.7	2446.18	15.8796	2442.86	18.3182	2450.82	24.7619	2459.49	55.0714	2471.68	77.3036	2464.97	29.6161	2436.62	13.575	2431.03	11.325	2454	25.0833	2411.5	10.1429	2381.56	10.6	2425.42	10.2857	2422.37	12.5417	2437.82	12.1125
2507.99	13.2067	2479.19	24.5345	2455.57	46.9375	2460.93	25.45	2447.87	17.6574	2444.55	20.6364	2452.51	27.9524	2461.18	51.3571	2473.37	75.9911	2466.65	27.5804	2438.32	11.125	2432.73	9.9	2455.69	24.1667	2413.2	7.14286	2383.27	11.3	2427.11	12.25	2424.06	10.2917	2439.52	13.0375
2509.67	13.535	2480.87	24.2299	2457.26	43.625	2462.62	23.4	2449.56	17.9074	2446.24	20.9773	2454.2	30.0238	2462.87	52.4524	2475.05	74.6786	2468.34	26.2589	2440.01	11.5	2434.42	10.975	2457.38	25.1667	2414.9	9.14286	2384.97	12.4875	2428.81	11.7857	2425.76	11.4792	2441.21	12.2875
2511.35	13.1641	2482.55	23.3621	2458.94	43	2464.31	26.2	2451.24	17.7222	2447.93	23.4545	2455.89	33.4762	2464.55	52	2476.73	74.2679	2470.02	25.0893	2441.7	12.9	2436.11	9.025	2459.06	26.1667	2416.59	10.1429	2386.67	12.3625	2430.5	12	2427.45	12.0625	2442.9	13.0375
2513.02	13.0091	2484.24	43.9713	2460.63	39.75	2465.99	23.35	2452.93	22.5093	2449.62	25.4773	2457.58	34.0952	2466.24	45.5	2478.41	74.3304	2471.71	23.6429	2443.39	14.875	2437.8	9.45	2460.75	24.5833	2418.29	9.5	2388.38	9.9	2432.19	11.2857	2429.15	9.85417	2444.59	16.9625
2514.7	12.3982	2485.92	22.8793	2462.32	39.25	2467.68	24.7	2454.62	24.463	2451.31	27.1136	2459.26	34.2857	2467.92	41.619	2480.1	72.3036	2473.39	25.5536	2445.08	14.55	2439.49	10.575	2462.44	26.25	2419.98	8.21429	2390.08	10.825	2433.89	12.0714	2430.84	12.1042	2446.28	15.9125
2516.37	12.7964	2487.6	22.2759	2464	42.1875	2469.36	22.975	2456.31	25.9167	2452.99	28.2727	2460.95	37.8571	2469.61	39.8333	2481.78	74.1518	2475.07	23.1339	2446.77	14.45	2441.19	11.4	2464.12	23.9167	2421.68	5.71429	2391.78	11.0125	2435.58	12.5357	2432.53	11.8333	2447.97	16.9
2518.04	12.3678	2489.28	21.9253	2465.69	32.0625	2471.05	23.275	2458	24.037	2454.68	27.9545	2462.64	35.4762	2471.29	40.6429	2483.46	73.2411	2476.76	22.6786	2448.46	15.5	2442.88	14.25	2465.81	25	2423.38	8	2393.48	13.1625	2437.27	12.875	2434.23	11.0833	2449.66	19.3625
2519.72	13.0699	2490.96	21.1494	2467.37	30.5	2472.73	18.825	2459.68	26.1389	2456.37	30.375	2464.32	36.1905	2472.97	37.8571	2485.14	73.7143	2478.44	21.9732	2450.15	16.15	2444.57	11.1	2467.49	24.4167	2425.07	12.0714	2395.18	11.3	2438.96	11.8571	2435.92	11.6042	2451.35	18.1125
2521.39	12.1398	2492.64	22.1552	2469.06	32.6875	2474.41	22.55	2461.37	25.3889	2458.06	30.9091	2466.01	33.3571	2474.66	38.6667	2486.82	72.1696	2480.12	21.9107	2451.84	16.45	2446.26	12.075	2469.18	20.3333	2426.76	9.07143	2396.88	11.0875	2440.65	13.2143	2437.61	11.8333	2453.03	20.425
2523.06	13.2614	2494.32	21.6724	2470.74	27.9375	2476.1	15.75	2463.06	25.6111	2459.75	30.2727	2467.69	31.7857	2476.34	36.0714	2488.5	70.5982	2481.8	20.3839	2453.53	16.55	2447.95	16.225	2470.86	25.8333	2428.46	7	2398.58	11.025	2442.34	14.8214	2439.3	12.5	2454.72	23.2125
2524.74	12.6809	2496	18.2874	2472.43	32.0625	2477.78	18.95	2464.74	26.0185	2461.43	30.2841	2469.38	28.5	2478.02	33.8571	2490.18	71.2679	2483.48	20.5357	2455.21	19.4	2449.64	13.45	2472.55	23.1667	2430.15	11.5714	2400.29	11.175	2444.03	14.2321	2440.99	14.9583	2456.41	22.6625
2526.41	12.5957	2497.68	19.908	2474.11	24.8125	2479.46	20.15	2466.43	23.3519	2463.12	27.9205	2471.06	30.1667	2479.71	31.6905	2491.86	71.6071	2485.17	19.7768	2456.9	18.825	2451.32	13.425	2474.23	19.9167	2431.84	9.78571	2401.98	12.975	2445.72	16.4821	2442.68	13.5833	2458.1	20.275
2528.08	11.7264	2499.35	20.6609	2475.79	29.875	2481.14	20.6	2468.11	22.287	2464.8	27.3523	2472.75	29.881	2481.39	31.619	2493.54	70.875	2486.85	18.75	2458.59	17.3	2453.01	16.65	2475.92	18.25	2433.54	8.21429	2403.68	11.9625	2447.41	17.5893	2444.37	15.0833	2459.78	21.05
2529.75	12.307	2501.03	21.2069	2477.48	24.875	2482.83	17.95	2469.8	22.2222	2466.49	25.6364	2474.43	27.9286	2483.07	29.9762	2495.22	69.4196	2488.53	18.1875	2460.28	19.1	2454.7	16.75	2477.6	18	2435.23	8.21429	2405.38	10.8125	2449.1	18.6786	2446.06	14.3958	2461.47	21.9
2531.42	12.31	2502.71	19.5575	2479.16	28.875	2484.51	15.875	2471.48	20	2468.17	23.9432	2476.11	24.7619	2484.75	30.9048	2496.9	71.2857	2490.21	19.0268	2461.96	18.875	2456.39	13.4	2479.28	25.9167	2436.92	11.7143	2407.08	10.8375	2450.79	22.1607	2447.75	17.75	2463.16	20.65
2533.09	12.1733	2504.39	19.1437	2480.84	28.25	2486.19	17.15	2473.17	20	2469.86	24.625	2477.8	24.7857	2486.43	30.3333	2498.58	71.5	2491.89	18.4643	2463.65	16.65	2458.08	16.725	2480.96	23.5	2438.61	13.7857	2408.78	10.8625	2452.48	22.3393	2449.44	18.0833	2464.84	17.7
2534.76	11.5198	2506.06	19.2644	2482.52	23.9375	2487.87	17.45	2474.85	19.6481	2471.54	22.8523	2479.48	24.881	2488.11	23.5476	2500.26	69.0446	2493.57	16.7768	2465.33	19.8	2459.76	16.3	2482.65	17.75	2440.31	8.64286	2410.48	12.4875	2454.17	24.0714	2451.13	18.9167	2466.53	19.5625
2536.43	11.4772	2507.74	18.4483	2484.21	21.5625	2489.55	17.075	2476.53	17.8148	2473.23	21.1477	2481.16	23.4048	2489.79	27.9524	2501.93	70.4107	2495.25	16.9911	2467.02	20.375	2461.45	19.425	2484.33	15.8333	2442	10	2412.18	11.1375	2455.86	26.9821	2452.82	19.3958	2468.21	17.8625
2538.1	12.2553	2509.41	17.3218	2485.89	22.375	2491.23	18.675	2478.22	17.3148	2474.91	20.6364	2482.84	21.4286	2491.47	27.2381	2503.61	71.9554	2496.92	16.6429	2468.7	18.725	2463.14	16.95	2486.01	14.1667	2443.69	16	2413.87	12.15	2457.54	24.7143	2454.51	21.1875	2469.9	15.375
2539.77	11.69	2511.09	19.5115	2487.57	22.8125	2492.91	15.1	2479.9	17.9259	2476.59	22.6477	2484.52	20.9524	2493.15	28.6667	2505.29	71.3393	2498.6	16.1071	2470.39	16.175	2464.82	16.2	2487.69	14.75	2445.38	16.7143	2415.57	10.675	2459.23	27.0357	2456.2	23.4792	2471.58	16.125
2541.44	10.9605	2512.77	18.2701	2489.25	22.1875	2494.59	15.2	2481.58	18.4259	2478.28	21.3182	2486.21	22.119	2494.83	25	2506.97	68.3304	2500.28	15.4375	2472.07	19.275	2466.51	18.225	2489.37	18.5833	2447.07	14	2417.27	11.9125	2460.92	24.7679	2457.88	26.1042	2473.27	17.7875
2543.11	11.8419	2514.44	19	2490.93	21.5	2496.27	15.45	2483.26	17.4259	2479.96	20.5455	2487.89	21.5	2496.51	24.7857	2508.64	68.3036	2501.96	14.2143	2473.76	17.475	2468.19	14.7	2491.05	21.9167	2448.76	18	2418.96	12.6125	2462.6	26.0536	2459.57	25.4583	2474.95	15.2625
2544.78	12.2401	2516.11	19.0517	2492.61	18.375	2497.95	14.175	2484.94	14.8148	2481.64	21.3068	2489.57	22.5714	2498.19	24.7381	2510.32	70.7768	2503.64	14.7589	2475.44	17.6	2469.88	15.1	2492.73	17.25	2450.44	13.3571	2420.66	14.275	2464.29	22.125	2461.26	23.1458	2476.63	12.6625
2546.45	12.0486	2517.79	18.1954	2494.29	23	2499.62	17	2486.63	14.2315	2483.32	18.0114	2491.25	18.3095	2499.87	23.2143	2511.99	69.0893	2505.31	15.1339	2477.12	17.075	2471.56	17.275	2494.41	15	2452.13	16.8571	2422.35	12.0625	2465.98	19.75	2462.94	23.2917	2478.32	16.3125
2548.11	12.152	2519.46	18.2126	2495.97	16.8125	2501.3	15.025	2488.31	15.4722	2485.01	18.625	2492.93	19.2857	2501.54	22.8571	2513.67	69.875	2506.99	15.6161	2478.81	16.6	2473.24	14.125	2496.09	16	2453.82	17.5	2424.05	13.8875	2467.66	21.75	2464.63	23.9792	2480	16.425
2549.78	12.4924	2521.14	19.0287	2497.64	22.5	2502.98	14.275	2489.99	15.5926	2486.69	18.4773	2494.61	18	2503.22	25.2143	2515.34	70.3839	2508.66	13.7143	2480.49	14.65	2474.93	18.5	2497.77	14.75	2455.51	17.0714	2425.74	13.05	2469.35	20.7857	2466.32	23.5833	2481.68	15.825
2551.45	11.8602	2522.81	16.9023	2499.32	17.75	2504.66	14.825	2491.67	14.2593	2488.37	17.9545	2496.28	19.5476	2504.9	21.7857	2517.02	70.9821	2510.34	15.9375	2482.17	14.875	2476.61	11.725	2499.44	12.5833	2457.2	15.7857	2427.44	12.2375	2471.03	17.6429	2468	21.2917	2483.36	14.45
2553.11	12.7264	2524.48	18.5575	2501	19.1875	2506.33	13.65	2493.35	13.7222	2490.05	15.1364	2497.96	17.2619	2506.58	22.1905	2518.69	68.4018	2512.02	14.7232	2483.85	16.375	2478.29	10.525	2501.12	16.1667	2458.88	19.4286	2429.13	13.425	2472.72	15.5179	2469.69	21.2917	2485.04	13.3625
2554.78	11.8723	2526.15	17.2759	2502.68	15.75	2508.01	17.225	2495.03	13.8889	2491.73	16.1136	2499.64	15.5952	2508.25	21.5952	2520.36	68.9732	2513.69	16.0268	2485.53	15.2	2479.98	13.325	2502.8	15.5	2460.57	14.0714	2430.82	13.4375	2474.4	17.1607	2471.37	21.3958	2486.72	12.2375
2556.45	13.465	2527.83	17.7299	2504.36	14.5	2509.69	14.05	2496.7	13.7407	2493.41	16.7273	2501.32	18.1667	2509.93	22.3095	2522.04	71.5804	2515.37	14.1875	2487.21	13.275	2481.66	11.275	2504.48	10.75	2462.26	19.5	2432.52	14.2125	2476.08	17.1964	2473.05	21.3958	2488.41	10.8625
2558.11	12.3191	2529.5	18.9195	2506.03	15.5625	2511.36	12.975	2498.38	13.1759	2495.09	16.5114	2503	19.3333	2511.6	21	2523.71	69.2768	2517.04	14.7857	2488.89	13.725	2483.34	12.2	2506.15	15.5833	2463.94	22.3571	2434.21	14.7875	2477.77	16.3929	2474.74	20.0417	2490.09	12.9625
2559.78	12.6869	2531.17	17.7701	2507.71	16.625	2513.04	14.425	2500.06	13.1204	2496.76	15.9545	2504.67	18.3095	2513.28	22.3333	2525.38	70.1786	2518.71	13.4911	2490.57	14.625	2485.02	13.975	2507.83	15	2465.63	17.7857	2435.9	14.5625	2479.45	15.0536	2476.42	18	2491.77	11.5375
2561.44	12.3465	2532.84	18.477	2509.38	20.375	2514.71	14.075	2501.74	12.6111	2498.44	16.0795	2506.35	15.5	2514.95	23.0238	2527.05	69.8839	2520.39	14.3571	2492.25	12.825	2486.7	13.45	2509.5	18.4167	2467.31	16.8571	2437.59	15.375	2481.13	16.0536	2478.1	19.7917	2493.44	12.1125
2563.1	12.997	2534.51	18.9885	2511.06	13.1875	2516.39	11.85	2503.42	12.3611	2500.12	16.3864	2508.03	20	2516.63	23.2857	2528.73	69.9375	2522.06	13.4554	2493.93	13.525	2488.38	15.3	2511.18	10.4167	2469	14.2143	2439.29	15.4875	2482.81	12.5893	2479.79	17.8333	2495.12	12.65
2564.77	12.1733	2536.18	17.8678	2512.74	18.8125	2518.06	12.55	2505.09	12.537	2501.8	14.9545	2509.7	14.119	2518.3	21.8095	2530.4	68.4911	2523.73	14.8036	2495.61	13.9	2490.06	9.1	2512.86	15.0833	2470.68	13.2857	2440.98	15.2875	2484.49	14.75	2481.47	16.25	2496.8	13.5375
2566.43	12.7994	2537.85	18.1897	2514.41	20.375	2519.73	12.55	2506.77	12.7593	2503.48	14.4091	2511.38	14.119	2519.97	20.4524	2532.07	68.7946	2525.4	13.5268	2497.29	14.05	2491.74	14.525	2514.53	20.25	2472.37	13.7857	2442.67	13.95	2486.17	13	2483.15	17.0833	2498.48	10.0625
2568.09	11.5532	2539.52	17.7241	2516.08	17.75	2521.41	14.4	2508.45	12.5278	2505.15	14.3636	2513.05	18.2381	2521.65	21.5714	2533.74	68.9286	2527.08	13.625	2498.97	11.65	2493.42	12.95	2516.2	14.8333	2474.05	10.0714	2444.36	15.9875	2487.85	15.9107	2484.83	19.2292	2500.16	11.9625
2569.76	12.7386	2541.19	19.0575	2517.76	12.5	2523.08	13.5	2510.12	14.1759	2506.83	14.4773	2514.73	15.8571	2523.32	19.5714	2535.41	70.75	2528.75	13.5446	2500.65	13.55	2495.1	12.525	2517.88	13.5	2475.74	14.1429	2446.05	16.525	2489.54	16.2143	2486.51	14.5208	2501.84	12.9625
2571.42	12.7356	2542.86	17.8103	2519.43	15.875	2524.75	12.575	2511.8	12.7963	2508.51	13.1932	2516.4	14.7381	2524.99	19	2537.08	67.4732	2530.42	14.9018	2502.33	11.05	2496.78	10.6	2519.55	16.5	2477.42	9.85714	2447.74	17.2375	2491.22	13.6429	2488.19	14.1458	2503.51	11.9875
2573.08	13.1368	2544.52	17.9828	2521.11	14.3125	2526.42	11.1	2513.47	11.463	2510.18	14.0682	2518.07	16.8571	2526.66	20.5238	2538.75	70.4643	2532.09	14.2768	2504	12.625	2498.46	12.75	2521.23	8.66667	2479.1	9.85714	2449.43	18.925	2492.89	12.875	2489.87	15.1875	2505.19	9.7625
2574.74	12.9119	2546.19	17.7816	2522.78	15.875	2528.1	13.1	2515.15	12.4815	2511.86	15.4545	2519.75	17.8095	2528.34	18.7381	2540.42	69.9643	2533.76	13.5446	2505.68	11.2	2500.14	10	2522.9	15.9167	2480.78	8.85714	2451.12	19.125	2494.57	13.9643	2491.55	15.5208	2506.87	14.6625
2576.4	12.6535	2547.86	18.2356	2524.45	11.875	2529.77	15.2	2516.82	13.7037	2513.53	14.7955	2521.42	17.2619	2530.01	19.0476	2542.09	68.3482	2535.43	12.8036	2507.36	13.1	2501.81	14.1	2524.57	13.5	2482.47	9.85714	2452.81	19.6625	2496.25	14.875	2493.23	16.5208	2508.54	12.025
2578.06	12.6018	2549.53	16.0862	2526.12	18.1875	2531.44	15.475	2518.49	12.0556	2515.21	13.8068	2523.09	15.881	2531.68	19.881	2543.75	69.3393	2537.1	13.9196	2509.03	12.975	2503.49	8.65	2526.24	17	2484.15	13.8571	2454.49	25.475	2497.93	11.625	2494.91	15.7292	2510.22	10.25
2579.72	12.6869	2551.19	17.9655	2527.8	21.5	2533.11	14.525	2520.17	12.4444	2516.88	13.6364	2524.77	14.8095	2533.35	18.6429	2545.42	70.4375	2538.77	14.625	2510.71	13.6	2505.17	10.825	2527.92	17.0833	2485.83	12.0714	2456.18	23.5375	2499.61	13.4643	2496.59	14.6042	2511.89	9.925
2581.38	12.4924	2552.86	17.5287	2529.47	14.1875	2534.78	13.85	2521.84	11.6481	2518.55	14.9773	2526.44	15.7381	2535.02	18.119	2547.09	67.7054	2540.44	12.875	2512.38	12.3	2506.85	12.075	2529.59	14.4167	2487.51	10.2143	2457.87	25.0125	2501.29	13.5	2498.27	14.5417	2513.57	11.625
2583.04	12.7751	2554.53	17.2931	2531.14	18.8125	2536.45	14.25	2523.51	14.5556	2520.23	13.3182	2528.11	13.7619	2536.69	21.0952	2548.76	68.9375	2542.11	11.75	2514.06	11.975	2508.52	9.9	2531.26	15.8333	2489.19	12.2857	2459.56	23.4	2502.96	13.8214	2499.95	13.9792	2515.24	9.6875
2584.7	12.3465	2556.19	18.569	2532.81	10.5625	2538.12	15.6	2525.19	12.6759	2521.9	13.8977	2529.78	17.8571	2538.36	20.4286	2550.42	68.9196	2543.78	12.9554	2515.73	11.725	2510.2	8.4	2532.93	12.1667	2490.87	8.57143	2461.24	24.55	2504.64	12.5	2501.63	14.7083	2516.92	10.2375
2586.36	12.9909	2557.86	17.3161	2534.48	14.6875	2539.79	12.625	2526.86	12.2593	2523.57	12.9545	2531.45	16.9762	2540.03	17.8333	2552.09	69.6161	2545.44	12.9821	2517.41	14.05	2511.87	12.675	2534.6	11.25	2492.55	13.2857	2462.93	23.775	2506.32	11.9464	2503.3	13.5208	2518.59	12.9625
2588.02	12.6565	2559.52	18.7759	2536.15	18.4375	2541.46	14.05	2528.53	10.9722	2525.25	14.1364	2533.12	14.6667	2541.7	19.1429	2553.76	68.9196	2547.11	14.2143	2519.08	12.425	2513.55	8.125	2536.27	11.9167	2494.23	8.42857	2464.61	26.5875	2507.99	12.9107	2504.98	13.2083	2520.27	12.0875
2589.68	13.2219	2561.19	19.7759	2537.82	20.75	2543.13	12.475	2530.2	12.5	2526.92	13.3523	2534.79	16.8571	2543.36	18.7857	2555.42	70.1607	2548.78	14.0089	2520.75	9.15	2515.22	10.8	2537.94	11.5	2495.91	10	2466.3	24.4875	2509.67	14.25	2506.66	13.0833	2521.94	10.6375
2591.34	13.5289	2562.85	18.7701	2539.49	11.8125	2544.79	14.35	2531.87	11.6019	2528.59	13.6364	2536.46	16.4048	2545.03	21.2381	2557.09	69.4107	2550.45	14.2054	2522.43	14.725	2516.9	10.05	2539.61	13.8333	2497.59	12.1429	2467.99	22.5375	2511.35	10.9643	2508.33	14.6875	2523.61	11.15
2592.99	13.8176	2564.51	18.7701	2541.16	11.75	2546.46	12.625	2533.54	13.0741	2530.26	11.8977	2538.13	15	2546.7	19.0714	2558.75	70	2552.11	11.9375	2524.1	11.275	2518.57	11.075	2541.28	14.8333	2499.26	10.6429	2469.67	20.1	2513.02	12.2679	2510.01	12.6042	2525.28	10.375
2594.65	13.0973	2566.18	16.6667	2542.83	16.5625	2548.13	11.35	2535.21	9.22222	2531.93	13.1932	2539.8	16.9048	2548.37	18.5	2560.42	68.1607	2553.78	13.4643	2525.77	11.875	2520.24	12.9	2542.95	16.8333	2500.94	9.21429	2471.35	21.9625	2514.7	10.8214	2511.68	15.0417	2526.96	9.375
2596.31	14.1398	2567.84	18.431	2544.49	16	2549.8	12.15	2536.88	13.6111	2533.6	11.9205	2541.47	16.7619	2550.03	19.7381	2562.08	68.5268	2555.44	12.625	2527.44	12.2	2521.92	7.975	2544.61	16.0833	2502.62	6.85714	2473.04	18.475	2516.37	10.8571	2513.36	15.5208	2528.63	9.6375
2597.96	13.5228	2569.5	18.8333	2546.16	13.8125	2551.46	12.55	2538.55	9.72222	2535.27	12.3409	2543.14	15.5	2551.7	19.9048	2563.74	65.7054	2557.11	14.9018	2529.11	14.475	2523.59	9.1	2546.28	15.4167	2504.3	9.07143	2474.72	17.4125	2518.04	10.75	2515.03	13.4167	2530.3	9.875
2599.62	14.8541	2571.16	17.0287	2547.83	17.1875	2553.13	14.325	2540.22	11.6574	2536.94	12.7273	2544.81	15.4762	2553.37	20.6429	2565.41	68.4375	2558.77	13.3571	2530.79	10.575	2525.26	11.35	2547.95	18.9167	2505.97	10.2857	2476.41	19.4125	2519.72	11.7857	2516.71	11.1042	2531.97	8.5625
2601.28	14.0243	2572.83	18.9885	2549.5	13.75	2554.79	14.6	2541.89	11.3426	2538.61	13.4205	2546.48	18.1667	2555.03	18.7619	2567.07	67.3661	2560.44	15.375	2532.46	10.075	2526.93	8.775	2549.62	13	2507.65	10.2857	2478.09	16.9125	2521.39	11.4643	2518.38	10	2533.64	10
2602.93	13.4347	2574.49	18.954	2551.16	16.25	2556.46	12.55	2543.56	11.9722	2540.28	13.3977	2548.14	16.8571	2556.7	19.5476	2568.73	70.0982	2562.1	12.4196	2534.13	12.175	2528.61	8.325	2551.28	16.1667	2509.32	6.71429	2479.77	17.475	2523.06	12.3393	2520.06	11.9583	2535.31	10.6625
2604.59	14.4043	2576.15	19.1322	2552.83	15.6875	2558.12	12.35	2545.23	13.0648	2541.95	13.9432	2549.81	16.0714	2558.36	19.2857	2570.4	67.3482	2563.77	14.4018	2535.8	13.425	2530.28	9.15	2552.95	15.6667	2511	12.2143	2481.45	18.825	2524.74	10.3571	2521.73	11.6042	2536.98	9.85
2606.24	14.9818	2577.81	19.8678	2554.5	17	2559.79	13.225	2546.9	10.5278	2543.62	13.2273	2551.48	15.5476	2560.03	21.8333	2572.06	70.7232	2565.43	12.6071	2537.47	11.15	2531.95	8.425	2554.61	11.9167	2512.68	8.85714	2483.14	16.075	2526.41	10.5	2523.4	11.5833	2538.65	8.5625
2607.89	15.4468	2579.47	17.1954	2556.16	20.375	2561.45	15.775	2548.56	10.2685	2545.29	14.6591	2553.14	15.3571	2561.69	16.8571	2573.72	69.1518	2567.09	14.3482	2539.14	8.5	2533.62	11.1	2556.28	14.5833	2514.35	9.57143	2484.82	16.6125	2528.08	11.2143	2525.07	11.75	2540.32	10.425
2609.55	16.1277	2581.13	19.6609	2557.83	13.375	2563.12	14.475	2550.23	12.3056	2546.95	13.6705	2554.81	16.8571	2563.36	17.0238	2575.38	70.8839	2568.76	12.4554	2540.81	12.575	2535.29	11.325	2557.95	14.9167	2516.03	8.57143	2486.5	15.6125	2529.75	13.875	2526.75	10.3542	2541.99	11.8375
2611.2	15.9088	2582.79	19.0517	2559.49	18.5	2564.78	10.55	2551.9	12.8981	2548.62	14.8068	2556.47	13.8333	2565.02	18.4524	2577.04	68.3304	2570.42	13.6161	2542.47	10.95	2536.96	9.1	2559.61	19.5833	2517.7	8.5	2488.18	15.4125	2531.42	10.3393	2528.42	13.2917	2543.66	9.6375
2612.86	16.2979	2584.45	17.1954	2561.16	17.8125	2566.44	13.375	2553.56	11.7037	2550.29	12.2727	2558.14	15.0714	2566.68	20.5952	2578.7	69.4643	2572.08	13.875	2544.14	10.575	2538.63	11.35	2561.27	12.5833	2519.37	10.6429	2489.86	15.6875	2533.09	12.3036	2530.09	11.0417	2545.32	9.775
2614.51	17.6322	2586.11	18.431	2562.82	16.5625	2568.11	12.675	2555.23	10.9167	2551.96	11.7386	2559.8	14.8333	2568.35	18.4524	2580.36	68.8929	2573.74	13.9464	2545.81	11.875	2540.3	9.05	2562.94	11.75	2521.05	11.3571	2491.54	16.0125	2534.76	11.3929	2531.76	13	2546.99	10.275
2616.16	18.3739	2587.77	19.7414	2564.48	15	2569.77	12.175	2556.89	11.1111	2553.62	13.4205	2561.47	15.9048	2570.01	21.0476	2582.02	68.3036	2575.4	13.2321	2547.48	11.175	2541.97	10.2	2564.6	17.5	2522.72	9	2493.22	16.05	2536.43	10	2533.43	11.2083	2548.66	10.6125
2617.81	18.1398	2589.42	18.6552	2566.15	19.875	2571.43	14.275	2558.56	11.7963	2555.29	14.5568	2563.13	14.7143	2571.67	20.0714	2583.68	71.9107	2577.06	14.7768	2549.14	13.025	2543.63	8.35	2566.27	16	2524.39	9.71429	2494.9	15.825	2538.1	12.8929	2535.1	13.5208	2550.33	8.15
2619.46	18.5593	2591.08	20.5287	2567.81	18	2573.09	13.475	2560.22	10.9537	2556.95	12.5568	2564.8	15.9286	2573.33	19.5238	2585.34	70.0893	2578.72	13.5893	2550.81	9.675	2545.3	8.15	2567.93	15.25	2526.06	10.6429	2496.58	14.1375	2539.77	10.1786	2536.77	12.25	2551.99	9.775
2621.12	19.6778	2592.74	18.8161	2569.47	13.4375	2574.76	13.3	2561.89	12.6204	2558.62	13.5795	2566.46	13.881	2574.99	15.9762	2587	69.0714	2580.38	14.3661	2552.48	8.775	2546.97	9.825	2569.59	16.3333	2527.74	8.07143	2498.25	15.6	2541.44	10.9286	2538.44	11.5417	2553.66	12.425
2622.77	20.8116	2594.4	20.0172	2571.14	18	2576.42	13.95	2563.55	13.1111	2560.28	11.375	2568.12	16.9524	2576.65	19.4048	2588.66	69.5089	2582.04	13.375	2554.14	12.525	2548.64	8.25	2571.25	12.9167	2529.41	5.64286	2499.93	17.8625	2543.11	11.7321	2540.11	9.625	2555.32	10.15
2624.42	21.1672	2596.05	20.1149	2572.8	13.875	2578.08	13.825	2565.22	12.713	2561.95	13.8182	2569.78	15.8571	2578.31	21.4048	2590.32	70.4643	2583.7	15.2768	2555.81	11.825	2550.3	8.675	2572.92	16.1667	2531.08	12.0714	2501.61	14.8375	2544.78	10.5893	2541.78	12.6667	2556.99	11.35
2626.07	21.5684	2597.71	18.4483	2574.46	18.9375	2579.74	14.275	2566.88	12	2563.61	12.5114	2571.45	14.6667	2579.97	22.1667	2591.97	71.1161	2585.36	14.2411	2557.47	11.8	2551.97	10.9	2574.58	12.0833	2532.75	11.8571	2503.29	14.1	2546.45	12.7321	2543.45	10.5625	2558.65	10.7625
2627.72	22.2857	2599.37	20.9483	2576.12	21.125	2581.4	12.175	2568.54	12.5556	2565.27	15.0795	2573.11	15.1667	2581.63	19.381	2593.63	69.1786	2587.02	15.3393	2559.14	10.875	2553.64	10.025	2576.24	13.9167	2534.42	12.7143	2504.96	13.975	2548.11	11.1429	2545.11	11.8125	2560.32	10.45
2629.37	23.9544	2601.02	20.9253	2577.78	16.75	2583.06	11.525	2570.2	13.4722	2566.94	14.4432	2574.77	14.9286	2583.29	20.5952	2595.29	70.2679	2588.68	13.0982	2560.8	10.175	2555.3	11.725	2577.9	14.25	2536.09	8.35714	2506.64	14.3875	2549.78	12.0536	2546.78	11.5	2561.98	9.35
2631.01	25.7356	2602.68	20.6322	2579.44	16	2584.72	13.7	2571.87	11.2222	2568.6	13.3409	2576.43	16.3571	2584.95	20.2381	2596.94	72.1607	2590.34	15.2054	2562.47	10.325	2556.97	7.7	2579.56	15.25	2537.76	7.21429	2508.32	14.9375	2551.45	10.7679	2548.45	12.4583	2563.65	11.7375
2632.66	26.2401	2604.33	20.8046	2581.1	15.25	2586.38	16.725	2573.53	12.6944	2570.26	13.1705	2578.09	14.4286	2586.61	22.7143	2598.6	70.4911	2592	15.2143	2564.13	13.525	2558.63	9.15	2581.22	13.75	2539.43	9.71429	2509.99	13.6	2553.11	10.1607	2550.12	11.3125	2565.31	10.1875
2634.31	28.9027	2605.99	20.4598	2582.76	21.0625	2588.03	15.575	2575.19	12.5833	2571.92	12.7727	2579.75	14.7857	2588.27	19.7619	2600.26	72.9196	2593.65	14.9911	2565.8	10.075	2560.3	11.4	2582.88	12.8333	2541.1	7.85714	2511.67	13.5625	2554.78	10.3393	2551.78	14.1458	2566.97	9.9125
2635.96	30.1033	2607.64	21.6379	2584.42	18.9375	2589.69	16.025	2576.85	12.9352	2573.59	12.4886	2581.41	15.881	2589.93	22.1905	2601.91	71.5625	2595.31	14.4821	2567.46	9.725	2561.96	8.325	2584.54	18	2542.77	10.3571	2513.34	13.725	2556.44	11.7679	2553.45	11.9583	2568.64	10.0125
2637.61	32.9514	2609.3	22.4943	2586.08	15.0625	2591.35	15.025	2578.51	13.0741	2575.25	14.3523	2583.07	15.0238	2591.59	20.4524	2603.57	72.5446	2596.97	14.9107	2569.12	13.725	2563.62	7.225	2586.2	16.75	2544.43	8.5	2515.02	13.8625	2558.11	11.375	2555.12	10.8542	2570.3	11.9875
2639.25	36.7872	2610.95	20.0747	2587.74	20.75	2593.01	14.9	2580.17	13.5648	2576.91	12.8977	2584.73	16.6667	2593.24	21.2381	2605.22	72.3304	2598.62	15.875	2570.78	10.35	2565.29	10.575	2587.86	15.9167	2546.1	7.21429	2516.69	13.1375	2559.77	11.4464	2556.78	12.25	2571.96	9.575
2640.9	39.4225	2612.6	22.0115	2589.4	21.9375	2594.66	17.725	2581.83	11.9074	2578.57	13.5568	2586.39	14.381	2594.9	20.6667	2606.88	74.9911	2600.28	14.7232	2572.45	12.6	2566.95	9.35	2589.51	12.5833	2547.77	7.21429	2518.37	13.3875	2561.44	9.375	2558.45	11.4167	2573.62	11.575
2642.55	43.1884	2614.25	22.8506	2591.05	16.6875	2596.32	15.05	2583.49	11.5	2580.23	12.9205	2588.05	15.1905	2596.56	21.881	2608.53	70.2321	2601.93	16.4018	2574.11	10.9	2568.61	11.4	2591.17	16	2549.44	5.78571	2520.04	12.075	2563.1	11.9643	2560.11	12.1042	2575.28	12.775
2644.19	48.2401	2615.91	21.5977	2592.71	19.8125	2597.98	18.2	2585.15	12.5833	2581.89	12.7614	2589.71	14.881	2598.21	22.3095	2610.18	73.6875	2603.59	14.5625	2575.77	12.575	2570.28	9.625	2592.83	14.4167	2551.1	10.7143	2521.71	14.325	2564.77	9.91071	2561.77	13.7917	2576.95	11.325
2645.84	53.6505	2617.56	24.6092	2594.37	17.4375	2599.63	16.85	2586.81	11.9259	2583.55	13.6023	2591.36	17.9524	2599.87	23.7619	2611.84	72.8125	2605.24	16.125	2577.43	11.6	2571.94	8.7	2594.49	17.25	2552.77	10.6429	2523.39	15.4625	2566.43	11.2857	2563.44	11.5833	2578.61	9.2875
2647.49	60.0091	2619.21	24.4368	2596.03	23.375	2601.29	17.225	2588.47	12.2778	2585.21	14.6364	2593.02	19.3333	2601.52	23.1905	2613.49	73.7768	2606.9	17.5625	2579.09	12.05	2573.6	9.775	2596.14	15.4167	2554.44	8.35714	2525.06	15	2568.09	10.6071	2565.1	12.6042	2580.27	11.4875
2649.13	69.2523	2620.86	25.6437	2597.68	21	2602.94	15.875	2590.13	14.0833	2586.87	14.3523	2594.68	17.6429	2603.18	22.881	2615.14	74.5179	2608.55	15.9821	2580.75	12.4	2575.26	9.65	2597.8	15.6667	2556.1	7.64286	2526.73	13.2375	2569.75	11.8393	2566.77	11.1875	2581.93	12.1625
2650.78	78.1033	2622.51	25.7931	2599.34	21.1875	2604.6	19.7	2591.78	11.6296	2588.53	13.6591	2596.33	15.2857	2604.83	23.7619	2616.79	73.1875	2610.2	16.6339	2582.41	11.7	2576.92	9.375	2599.46	17.25	2557.77	6	2528.4	13.1	2571.42	12.9464	2568.43	13.5	2583.59	11.5125
2652.42	90.4498	2624.16	27.7989	2600.99	17.5625	2606.25	17.65	2593.44	12.713	2590.18	14.7273	2597.99	16.881	2606.49	27.6667	2618.45	74.4821	2611.86	18.4732	2584.07	9.7	2578.58	8.825	2601.11	13.3333	2559.43	8.28571	2530.07	13.275	2573.08	12.1429	2570.09	11.4792	2585.24	9.275
2654.06	103.614	2625.81	28.0172	2602.65	16.4375	2607.91	16.45	2595.1	11.8704	2591.84	13.9773	2599.65	17.0238	2608.14	25.5238	2620.1	74.625	2613.51	20.1339	2585.73	12.375	2580.24	9.325	2602.77	15.6667	2561.1	8.85714	2531.75	14.15	2574.74	11.7679	2571.75	13.8542	2586.9	12.8875
2655.71	120.058	2627.46	29.8621	2604.3	27.625	2609.56	23.425	2596.75	12.5833	2593.5	14.3295	2601.3	20.0238	2609.8	25.2619	2621.75	73.0714	2615.16	18.7321	2587.39	13.675	2581.9	10.2	2604.42	18.5833	2562.76	11.2143	2533.42	12.65	2576.4	13.5357	2573.42	12.625	2588.56	12.225
2657.35	139.176	2629.11	31.3333	2605.96	27.625	2611.22	23.025	2598.41	12.5185	2595.16	14.6591	2602.96	16.9286	2611.45	27.381	2623.4	75.9375	2616.82	20.2321	2589.05	13.25	2583.56	9.4	2606.08	17.8333	2564.42	8.28571	2535.09	14.35	2578.06	10.5536	2575.08	12.7083	2590.22	11.35
2658.99	162.176	2630.76	33.5172	2607.61	22.5	2612.87	23.4	2600.07	12.7685	2596.81	14.7955	2604.61	20.2143	2613.1	27.3333	2625.05	76.7589	2618.47	18.7589	2590.7	12	2585.22	9.275	2607.73	14.9167	2566.09	11.2857	2536.76	13.9625	2579.72	10.7679	2576.74	12.6667	2591.88	13
2660.64	187.553	2632.41	32.8851	2609.27	25.6875	2614.52	23.575	2601.72	12.9444	2598.47	17.4318	2606.27	16.6429	2614.76	29.7143	2626.7	75.7321	2620.12	21.7232	2592.36	12.4	2586.88	12.8	2609.38	17.0833	2567.75	10.9286	2538.43	11.8875	2581.38	11.7679	2578.4	11.4583	2593.53	12.125
2662.28	217.845	2634.06	37.0632	2610.92	25.875	2616.17	23.325	2603.38	15.75	2600.12	14.8977	2607.92	18.7619	2616.41	28.881	2628.35	79.2589	2621.77	20.3393	2594.02	14.8	2588.54	8.725	2611.04	18.8333	2569.41	10.2143	2540.09	12.6	2583.04	12.9643	2580.06	12.2083	2595.19	11.5125
2663.92	249.571	2635.71	39.3908	2612.57	25.4375	2617.83	22.55	2605.03	12.8426	2601.78	17.3182	2609.57	20.1429	2618.06	30.0714	2630	78.1339	2623.42	22.9018	2595.67	15.075	2590.2	9.675	2612.69	21.5833	2571.07	7.78571	2541.76	13.1125	2584.7	11.625	2581.72	12.9583	2596.85	11.675
2665.56	287.182	2637.35	42.0747	2614.23	25.625	2619.48	24.35	2606.69	13.0648	2603.44	16.0227	2611.23	19.9048	2619.71	32.5238	2631.65	79.6696	2625.07	23.2232	2597.33	12.9	2591.85	11.975	2614.34	20.1667	2572.74	11.5	2543.43	12.825	2586.36	12.1071	2583.38	13.875	2598.5	13.225
2667.2	326.45	2639	44.4828	2615.88	29	2621.13	26.9	2608.34	12.2778	2605.09	13.9432	2612.88	20.4286	2621.36	30.4048	2633.3	77.1875	2626.72	24.8393	2598.99	13.2	2593.51	10.175	2616	17.3333	2574.4	8.57143	2545.1	12.75	2588.02	11.4107	2585.04	11.8542	2600.16	12.0625
2668.84	361.41	2640.65	47.7356	2617.53	32	2622.78	26.475	2609.99	14.7593	2606.74	16.3068	2614.53	20.2381	2623.01	37.3571	2634.94	80.3304	2628.37	26.6696	2600.64	12.925	2595.17	13.75	2617.65	16	2576.06	11.7143	2546.77	12.525	2589.68	11.8571	2586.7	12.625	2601.82	11.4
2670.48	396.523	2642.3	53.0402	2619.18	27.1875	2624.43	30.6	2611.65	15.9907	2608.4	16.2841	2616.19	19.3571	2624.66	34.3571	2636.59	81.8214	2630.02	28.1518	2602.3	13.25	2596.83	11.025	2619.3	19.6667	2577.72	11.1429	2548.43	12.775	2591.33	11.5536	2588.35	12.75	2603.47	13.325
2672.12	427.815	2643.94	57.4885	2620.83	33	2626.08	29.55	2613.3	16.2222	2610.05	18.1818	2617.84	22.119	2626.31	37.3571	2638.24	83.375	2631.67	28.7857	2603.95	13.075	2598.48	9.25	2620.95	21.0833	2579.38	11.5	2550.1	12.2875	2592.99	13.5893	2590.01	13.4792	2605.13	12.8375
2673.76	448.125	2645.59	61.6149	2622.48	36.5625	2627.73	32.85	2614.95	15.0185	2611.71	17.9545	2619.49	22.6905	2627.96	41.3571	2639.89	85.2321	2633.32	31.5268	2605.61	11.975	2600.14	11.45	2622.6	19.9167	2581.04	11.1429	2551.77	12.4625	2594.65	11.1429	2591.67	13.0208	2606.78	10.7125
2675.4	459.927	2647.23	69.1207	2624.14	33.4375	2629.38	37.325	2616.61	15.0185	2613.36	17.1477	2621.14	22.6429	2629.61	44.5238	2641.53	85.25	2634.96	33.4821	2607.26	11.325	2601.79	11.55	2624.25	20.0833	2582.7	11.1429	2553.43	12.0875	2596.31	13.3393	2593.33	12.1458	2608.43	12.9375
2677.04	459.954	2648.88	74.4023	2625.79	37.625	2631.03	41.65	2618.26	17.25	2615.01	19.4432	2622.79	24.5238	2631.26	45.6905	2643.18	87.0804	2636.61	35.5625	2608.92	12.775	2603.45	11.125	2625.9	18.9167	2584.36	10.5	2555.1	11.5625	2597.96	12.3393	2594.98	13.0833	2610.09	14.7375
2678.68	450.426	2650.52	83.1782	2627.44	40	2632.68	43.2	2619.91	17.5648	2616.66	16.5909	2624.44	22.619	2632.91	48.5238	2644.82	89.6786	2638.26	37.4464	2610.57	14.675	2605.1	11.05	2627.55	24.5833	2586.02	9	2556.77	12.3	2599.62	13.25	2596.64	13.9167	2611.74	12.275
2680.32	433.739	2652.17	94.4713	2629.08	51.6875	2634.32	47.55	2621.56	16.2685	2618.31	18.8977	2626.09	26.5	2634.56	51.8571	2646.47	94.5536	2639.91	41.6786	2612.22	12.4	2606.76	9.7	2629.2	25	2587.68	6.35714	2558.43	13.7	2601.27	13.1786	2598.3	14.1875	2613.39	13.9375
2681.96	410.632	2653.81	105.546	2630.73	44.5	2635.97	48.575	2623.21	18.1852	2619.97	19.3523	2627.74	28.4286	2636.21	55.9524	2648.12	98.6696	2641.55	43.75	2613.88	14.975	2608.41	12.1	2630.85	23.6667	2589.33	7.07143	2560.1	12.3625	2602.93	13.3036	2599.95	13.1458	2615.05	16.35
2683.59	381.717	2655.45	120	2632.38	50.4375	2637.62	56.175	2624.86	19.537	2621.62	22.3523	2629.39	27.5476	2637.85	57.9048	2649.76	97.6875	2643.2	50.4643	2615.53	16.575	2610.06	12.425	2632.5	27.9167	2590.99	8.14286	2561.76	13.6125	2604.58	13.875	2601.61	13.8542	2616.7	16.025
2685.23	347.751	2657.1	137.937	2634.03	58.25	2639.27	65.6	2626.51	19.8796	2623.27	20.6705	2631.04	28.7857	2639.5	64.5238	2651.4	105.723	2644.85	56.4196	2617.18	15	2611.72	9.225	2634.15	24.25	2592.65	9.85714	2563.42	12.25	2606.24	12.8036	2603.26	13.1667	2618.35	12.3
2686.87	314.9	2658.74	153.977	2635.68	60.875	2640.91	71.3	2628.16	20.1019	2624.92	21.8636	2632.69	28.619	2641.15	70.7619	2653.05	111.554	2646.49	60.5714	2618.83	15.85	2613.37	12.2	2635.8	28.4167	2594.31	9.71429	2565.09	13.55	2607.89	13.3571	2604.92	13.9792	2620	15.725
2688.5	280.404	2660.38	175.718	2637.33	67.3125	2642.56	81.5	2629.81	22.5741	2626.57	24.5682	2634.34	32.8571	2642.79	76.619	2654.69	115.429	2648.14	67.2589	2620.48	14.375	2615.02	10.775	2637.44	31.9167	2595.96	9.07143	2566.75	12.95	2609.55	14.6786	2606.57	12.8125	2621.65	16.1
2690.14	247.182	2662.03	199.615	2638.97	78.375	2644.21	89.425	2631.46	22.287	2628.22	25.2045	2635.98	32.4286	2644.44	83.7143	2656.34	122.5	2649.78	77.4554	2622.13	14.425	2616.68	11.8	2639.09	32	2597.62	10	2568.41	13.05	2611.2	14.0714	2608.23	13.9792	2623.3	15.7375
2691.78	217.705	2663.67	224.914	2640.62	84.1875	2645.85	99.15	2633.11	23.1852	2629.87	26.3523	2637.63	36.5714	2646.08	95.119	2657.98	133.321	2651.43	85.9464	2623.79	15.15	2618.33	15.775	2640.74	32.4167	2599.28	11.0714	2570.08	13.0625	2612.85	13.8393	2609.88	14.6042	2624.95	16.2875
2693.41	188.319	2665.31	253.466	2642.27	97.4375	2647.5	113.325	2634.76	24.3426	2631.52	29.8409	2639.28	37.2381	2647.73	106.452	2659.62	143.839	2653.07	95.0357	2625.44	17.025	2619.98	12.6	2642.38	32.8333	2600.93	6.07143	2571.74	11.7375	2614.5	15.0536	2611.53	13.75	2626.6	18.175
2695.05	163.815	2666.95	283.069	2643.91	111.188	2649.14	128.9	2636.4	26.2778	2633.17	29.4545	2640.93	42.0476	2649.37	119.286	2661.26	158.125	2654.71	110.83	2627.09	16.4	2621.63	13.875	2644.03	43.0833	2602.59	9.78571	2573.4	14.075	2616.16	15.875	2613.19	17.1667	2628.25	18.25
2696.68	142.45	2668.59	308.851	2645.56	127.812	2650.79	143.125	2638.05	28.6481	2634.81	34.25	2642.57	44.6905	2651.02	132.024	2662.91	176.714	2656.36	125.268	2628.73	17.125	2623.28	13.8	2645.68	41.5	2604.24	9.85714	2575.06	14.175	2617.81	15.8214	2614.84	14.3958	2629.9	18.3375
2698.31	123.438	2670.23	341.747	2647.21	144.438	2652.43	161.525	2639.7	31.1019	2636.46	34.9886	2644.22	49.1429	2652.66	149.952	2664.55	196.089	2658	142.83	2630.38	21.2	2624.93	13.05	2647.32	44.8333	2605.9	10.7143	2576.72	13.2875	2619.46	17.125	2616.49	15.9167	2631.55	22.6125
2699.95	106.574	2671.87	367.063	2648.85	155.5	2654.08	183.775	2641.35	34.5556	2638.11	38.7614	2645.86	53.1905	2654.31	171.738	2666.19	217.321	2659.64	165.161	2632.03	21.575	2626.58	15.4	2648.97	45.25	2607.55	9.57143	2578.38	12.85	2621.11	15.75	2618.14	16.9375	2633.2	21.05
2701.58	93.9544	2673.51	386.138	2650.49	196.5	2655.72	209.375	2642.99	34.75	2639.76	38.3409	2647.51	57.2381	2655.95	196.833	2667.83	240.384	2661.28	188.768	2633.68	18	2628.23	12.65	2650.61	47	2609.2	10.5714	2580.04	14.55	2622.76	18.25	2619.8	15.9375	2634.85	21.425
2703.22	82.6869	2675.15	400.667	2652.14	212.312	2657.36	236	2644.64	39.3241	2641.4	44.3295	2649.15	69.8571	2657.59	229.929	2669.47	271.536	2662.93	216.071	2635.33	19.775	2629.88	17.25	2652.26	57.1667	2610.86	12.7143	2581.7	13.4	2624.41	19.6964	2621.45	16.7708	2636.5	24.825
2704.85	73.8419	2676.79	405.115	2653.78	255.312	2659.01	264.95	2646.28	46.4907	2643.05	48.7386	2650.8	78.3571	2659.24	267.31	2671.11	295.384	2664.57	243.848	2636.98	22.175	2631.53	17.425	2653.9	66.0833	2612.51	12.2857	2583.36	11.9125	2626.06	19.9286	2623.1	17.9583	2638.14	27.7625
2706.48	66.2128	2678.43	399.701	2655.43	294.125	2660.65	293.75	2647.93	50.8426	2644.69	55.625	2652.44	82.9524	2660.88	310	2672.75	327.17	2666.21	281.929	2638.62	24.8	2633.18	14.55	2655.54	79.1667	2614.16	10.2857	2585.02	13.1625	2627.71	19.2321	2624.75	17.9375	2639.79	25.95
2708.11	60.2492	2680.07	386.08	2657.07	339.688	2662.29	318.1	2649.57	56.0741	2646.34	61.1591	2654.09	99.0476	2662.52	354.762	2674.39	350.509	2667.85	319.598	2640.27	23.075	2634.82	19.325	2657.19	83.25	2615.82	10.7857	2586.68	13.0125	2629.36	20.8571	2626.4	18.5	2641.44	29.4375
2709.74	53.3526	2681.7	370.339	2658.71	390.062	2663.93	344.35	2651.22	63.5093	2647.99	68.1136	2655.73	109.762	2664.16	410.762	2676.03	375.929	2669.49	354.616	2641.92	25.65	2636.47	20.3	2658.83	91.75	2617.47	11.4286	2588.34	12.8	2631.01	22.9821	2628.05	19.875	2643.08	32.9375
2711.38	49.6687	2683.34	350.241	2660.36	463.875	2665.57	371.85	2652.86	74.4167	2649.63	77.2614	2657.37	130.524	2665.8	473.786	2677.67	387.616	2671.13	394.821	2643.56	25.825	2638.12	21	2660.47	101.333	2619.12	15.7857	2590	13.55	2632.66	23.2143	2629.7	19.5833	2644.73	34.75
2713.01	44.3252	2684.98	323.713	2662	540.625	2667.21	389.15	2654.51	83.9074	2651.28	86.5909	2659.02	150.19	2667.44	549.667	2679.31	393.116	2672.77	435.188	2645.21	27.025	2639.77	24.825	2662.11	113.417	2620.77	13.7143	2591.66	14.825	2634.31	24.0357	2631.35	23.5625	2646.38	40.125
2714.64	39.3435	2686.61	299.713	2663.64	584.5	2668.86	405.975	2656.15	95.8611	2652.92	96.125	2660.66	172.929	2669.09	621.381	2680.94	395.375	2674.41	463.482	2646.86	32.325	2641.41	23.575	2663.76	134.333	2622.42	10.4286	2593.31	14.1	2635.96	24.9464	2632.99	19.7083	2648.02	43.475
2716.27	37.6383	2688.25	267.213	2665.28	634.25	2670.5	421.825	2657.79	111.491	2654.56	111.58	2662.3	198.31	2670.73	691.333	2682.58	385.455	2676.05	493.893	2648.5	34.875	2643.06	25.075	2665.4	150.25	2624.07	12.0714	2594.97	12.7	2637.6	29.5179	2634.64	25	2649.67	52.2875
2717.9	36.6717	2689.89	244.609	2666.92	696.125	2672.14	420.025	2659.44	130.324	2656.21	127.011	2663.94	233.214	2672.37	768.524	2684.22	371.696	2677.69	508.277	2650.15	38.325	2644.71	26.925	2667.04	183.833	2625.72	15.5714	2596.63	13.6375	2639.25	31.9464	2636.29	26.5625	2651.31	54.5
2719.53	31.2675	2691.52	221.747	2668.56	725	2673.78	411.2	2661.08	147.991	2657.85	144.852	2665.58	267.69	2674	837.667	2685.86	350.955	2679.33	522.17	2651.79	41.3	2646.35	29.35	2668.68	208.083	2627.37	19.2143	2598.28	14.55	2640.9	31.9107	2637.94	26.2292	2652.95	59.975
2721.16	30.1125	2693.16	198.023	2670.2	747.5	2675.41	397.375	2662.72	173.546	2659.49	163.727	2667.23	312.048	2675.64	880.643	2687.49	332.098	2680.96	515.098	2653.43	48.9	2648	35	2670.32	239.333	2629.02	13.3571	2599.94	12.8375	2642.54	37.5	2639.59	28.2917	2654.6	70.6125
2722.79	28.3495	2694.79	178.77	2671.84	774.812	2677.05	371.975	2664.36	203.954	2661.14	185.898	2668.87	347.143	2677.28	923.31	2689.13	307.661	2682.6	503.866	2655.08	53.5	2649.64	35.15	2671.96	264.25	2630.67	20	2601.59	14.6125	2644.19	41.6964	2641.23	29.8958	2656.24	78.625
2724.41	26.4286	2696.43	159.563	2673.48	762.875	2678.69	350.375	2666	232.102	2662.78	213.489	2670.51	400.476	2678.92	939.19	2690.76	283.009	2684.24	477.241	2656.72	57.225	2651.29	39.85	2673.6	281.75	2632.32	22.8571	2603.25	12.8	2645.84	43.0536	2642.88	34.9167	2657.88	87.0125
2726.04	25.3526	2698.06	143.776	2675.12	727.938	2680.33	331.75	2667.64	265.361	2664.42	239.227	2672.15	443.976	2680.56	925.69	2692.4	260.214	2685.88	455.348	2658.36	70.4	2652.93	46.15	2675.24	295.667	2633.97	22.5714	2604.9	14.85	2647.48	47.1607	2644.52	36.9583	2659.53	105.838
2727.67	23.9027	2699.7	134.931	2676.76	703.438	2681.97	294.025	2669.29	298.287	2666.06	266.33	2673.79	494.357	2682.2	912.238	2694.03	237.696	2687.51	415.027	2660.01	79.175	2654.57	50	2676.88	324.25	2635.62	18.9286	2606.56	14.6375	2649.13	53.4286	2646.17	42.5417	2661.17	118.9
2729.3	22.4043	2701.33	123.397	2678.4	661.062	2683.61	267.3	2670.93	325.509	2667.7	296.273	2675.43	521.762	2683.83	856.929	2695.67	218.812	2689.15	382.464	2661.65	88.1	2656.22	53.6	2678.52	331.5	2637.26	19.1429	2608.21	14.7875	2650.77	61.0179	2647.82	44.375	2662.81	133.875
2730.92	22.0426	2702.96	111.178	2680.04	601.562	2685.24	238.6	2672.57	356.074	2669.34	328.205	2677.06	552.548	2685.47	806.238	2697.3	202.652	2690.78	342.866	2663.29	99.05	2657.86	63.75	2680.15	318.167	2638.91	23.2143	2609.87	14.8375	2652.42	69.7143	2649.46	51.9167	2664.45	154.475
2732.55	20.7234	2704.6	101.782	2681.68	545.375	2686.88	213.075	2674.21	381.074	2670.98	360.523	2678.7	556.262	2687.11	737.619	2698.94	185.821	2692.42	305.946	2664.93	117.425	2659.5	69.575	2681.79	313.25	2640.56	23.0714	2611.52	14.5875	2654.06	75.9643	2651.11	56.8333	2666.09	179.525
2734.18	19.8511	2706.23	95.4828	2683.31	499.812	2688.52	186.8	2675.84	397.611	2672.62	389.091	2680.34	561.976	2688.74	667.929	2700.57	169.214	2694.05	271.152	2666.57	129.975	2661.15	80.725	2683.43	297.25	2642.2	26.1429	2613.17	15.8375	2655.7	86.4464	2652.75	63.9583	2667.74	204.075
2735.8	19.1793	2707.86	90.0115	2684.95	438.125	2690.15	170.55	2677.48	404.407	2674.26	414.852	2681.98	540.548	2690.38	604.643	2702.2	158.375	2695.69	241.473	2668.21	147.55	2662.79	87.325	2685.07	291.167	2643.85	29.7143	2614.83	17.225	2657.35	97.6786	2654.39	72.3958	2669.38	224.75
2737.43	18.8906	2709.49	84.9023	2686.59	383.625	2691.79	149.7	2679.12	399.972	2675.9	434.023	2683.62	513.357	2692.02	528.31	2703.84	149.196	2697.32	209.348	2669.86	166.575	2664.43	97.75	2686.7	259.417	2645.5	29.3571	2616.48	16.725	2658.99	113.875	2656.04	78.5833	2671.02	250.537
2739.05	17.6657	2711.12	76.4885	2688.22	332.938	2693.42	135.45	2680.76	389.491	2677.54	447.057	2685.25	492.643	2693.65	465.381	2705.47	143.188	2698.96	183.821	2671.5	185.1	2666.07	114.25	2688.34	249.917	2647.14	28.7143	2618.13	17.925	2660.63	134.821	2657.68	96.3542	2672.66	277.525
2740.68	17.6657	2712.75	72.3103	2689.86	292.5	2695.06	127.7	2682.4	375.213	2679.18	444.602	2686.89	447.952	2695.29	402.238	2707.1	133.679	2700.59	160.875	2673.13	194.775	2667.71	124.525	2689.98	222.333	2648.79	33.2143	2619.78	18.875	2662.27	150.411	2659.32	112.396	2674.3	298.4
2742.3	16.7052	2714.39	69.1494	2691.5	257.25	2696.69	112.95	2684.04	353.528	2680.82	434.432	2688.53	405.571	2696.92	347.833	2708.73	128.768	2702.22	140.554	2674.77	212.525	2669.35	136.2	2691.61	200.333	2650.43	32.5	2621.43	17.85	2663.92	174.857	2660.97	128.271	2675.94	316.562
2743.93	17.2523	2716.02	64.9425	2693.13	215.25	2698.33	100.725	2685.67	323.139	2682.45	420.943	2690.16	364.786	2698.55	302.238	2710.37	122.366	2703.86	121.679	2676.41	225.85	2670.99	154.925	2693.25	179.667	2652.08	40.3571	2623.08	16.9125	2665.56	200.714	2662.61	152.458	2677.57	329.25
2745.55	15.4833	2717.65	61.5517	2694.77	200.938	2699.96	94.45	2687.31	301.778	2684.09	400.727	2691.8	324.833	2700.19	263.357	2712	118.455	2705.49	109.83	2678.05	232.1	2672.63	170.625	2694.88	166	2653.72	46.5	2624.73	18.725	2667.2	226.679	2664.25	170.083	2679.21	327.663
2747.18	16.3009	2719.28	56.592	2696.4	166.938	2701.59	89	2688.95	269.481	2685.73	372.159	2693.43	292.643	2701.82	232.119	2713.63	117.42	2707.12	97.2321	2679.69	237.575	2674.27	180.075	2696.52	150.5	2655.36	49.9286	2626.38	19.7625	2668.84	256.554	2665.89	199.729	2680.85	323.975
2748.8	15.2705	2720.9	53.8678	2698.04	150.562	2703.23	81.85	2690.58	240.509	2687.36	345.216	2695.07	254.905	2703.45	198.571	2715.26	113.679	2708.75	88.0625	2681.33	233.85	2675.91	191.6	2698.15	131.333	2657.01	47.7143	2628.03	21.7125	2670.48	291.464	2667.53	231.167	2682.49	317.475
2750.42	15.9787	2722.53	52.046	2699.67	132.438	2704.86	75.95	2692.22	213.204	2689	309.784	2696.7	220.5	2705.09	184.048	2716.89	110.839	2710.39	77.7857	2682.97	230.9	2677.55	201.725	2699.78	126.25	2658.65	63.0714	2629.68	22.875	2672.12	322.196	2669.17	267.792	2684.13	303.775
2752.04	14.459	2724.16	45.7414	2701.3	124.938	2706.49	71.3	2693.85	190.25	2690.64	282.068	2698.34	189.286	2706.72	155.714	2718.52	107.991	2712.02	71.7232	2684.6	227.35	2679.19	204.625	2701.42	105.417	2660.29	61.0714	2631.33	23.7125	2673.76	354.482	2670.81	296.771	2685.76	276.8
2753.67	14.5684	2725.79	45.3793	2702.94	106.938	2708.12	62.475	2695.49	163.046	2692.27	252.148	2699.97	165.762	2708.35	141.143	2720.15	105.411	2713.65	65.9018	2686.24	213.55	2680.83	210.125	2703.05	91.1667	2661.93	75.5714	2632.98	24.25	2675.4	381.518	2672.45	332.583	2687.4	258.075
2755.29	13.8906	2727.42	41.1839	2704.57	97.9375	2709.76	62.775	2697.12	141.37	2693.91	223.034	2701.6	145.762	2709.98	126.81	2721.78	103.625	2715.28	59.8929	2687.88	201.275	2682.46	216.725	2704.68	92.1667	2663.58	87.7143	2634.63	21.7125	2677.04	392.661	2674.09	365.125	2689.04	233.75
2756.91	14.5745	2729.05	40.5575	2706.2	89.75	2711.39	54.75	2698.76	126.019	2695.54	195.216	2703.24	125.429	2711.61	113.167	2723.41	102.795	2716.91	53.5625	2689.51	183.25	2684.1	211.325	2706.32	86.4167	2665.22	102.714	2636.28	25.4625	2678.67	403.911	2675.73	385.562	2690.67	209.55
2758.53	14.0699	2730.67	36.7299	2707.83	75.75	2713.02	53.25	2700.39	110.907	2697.18	171.125	2704.87	112	2713.24	105.738	2725.03	102.616	2718.54	51.7411	2691.15	170.3	2685.74	207.025	2707.95	79.25	2666.86	111.429	2637.92	26.6375	2680.31	402.786	2677.37	399.812	2692.31	184.887
2760.15	14.5319	2732.3	34.477	2709.47	68.9375	2714.65	52.65	2702.02	97.7685	2698.81	150.545	2706.5	100.667	2714.88	90.0476	2726.66	101.321	2720.17	48.5446	2692.78	159.45	2687.37	197.725	2709.58	81.25	2668.5	122.643	2639.57	29.9625	2681.95	405.929	2679.01	400.896	2693.94	165.088
2761.77	13.7629	2733.93	33.5575	2711.1	72.8125	2716.28	46.4	2703.66	86.6574	2700.44	133.409	2708.13	86.619	2716.51	85.3571	2728.29	97.7321	2721.8	45.3661	2694.42	139.275	2689.01	186.125	2711.21	70.8333	2670.14	137.143	2641.22	33.3375	2683.59	385.839	2680.65	410.25	2695.58	143.338
2763.39	13.5775	2735.55	32.046	2712.73	66.0625	2717.91	46	2705.29	75.2963	2702.08	116.864	2709.76	78.7381	2718.13	83.6667	2729.92	96.2411	2723.42	43.4286	2696.05	125.475	2690.65	177.7	2712.84	64.3333	2671.78	141.571	2642.86	35.6375	2685.23	364.339	2682.28	391.562	2697.21	125.688
2765.01	13.3009	2737.18	27.9598	2714.36	55.875	2719.54	41.45	2706.92	70.2685	2703.71	106.455	2711.4	73.0714	2719.76	73.3571	2731.54	97.7857	2725.05	40.8661	2697.69	113.3	2692.28	162.2	2714.47	68.8333	2673.42	174	2644.51	38.25	2686.86	333.429	2683.92	372.479	2698.84	108.425
2766.63	13.7356	2738.8	29.1782	2715.99	52.75	2721.17	39.375	2708.55	60.8611	2705.34	92.5227	2713.03	64.0238	2721.39	64.4048	2733.17	92.3661	2726.68	36.1518	2699.32	104.275	2693.92	149.375	2716.1	61.5833	2675.06	170.643	2646.16	41.65	2688.5	312.25	2685.56	351.417	2700.48	96.025
2768.25	12.9119	2740.43	27.523	2717.62	53.5625	2722.8	39.275	2710.18	54.0741	2706.98	84.5455	2714.66	56.4762	2723.02	63.3333	2734.8	89.8393	2728.31	35.4732	2700.96	89.925	2695.55	136.95	2717.73	57.0833	2676.7	172	2647.8	47.1	2690.13	275.946	2687.2	321.812	2702.11	85.7
2769.87	12.6444	2742.05	27.0632	2719.25	49.375	2724.43	38.75	2711.82	50.1944	2708.61	73.2159	2716.29	55.5714	2724.65	55.8333	2736.42	92.0357	2729.94	32.5714	2702.59	81.8	2697.19	119.775	2719.36	59.1667	2678.34	179.643	2649.45	51.4	2691.77	244.518	2688.83	287.208	2703.74	76.2375
2771.49	12.8906	2743.68	26.2644	2720.88	40.3125	2726.05	33.7	2713.45	46.1204	2710.24	67.0227	2717.92	51.5	2726.28	51.7857	2738.05	89.4643	2731.56	31.5357	2704.22	74.6	2698.82	109.05	2720.99	58.3333	2679.97	182.143	2651.09	57.35	2693.41	215.696	2690.47	260.188	2705.38	67.4625
2773.1	13.2158	2745.3	25.2241	2722.51	44.6875	2727.68	33.25	2715.08	42.3426	2711.87	59.9432	2719.55	45.9524	2727.91	49.1667	2739.67	88.2321	2733.19	29.4821	2705.85	69.725	2700.45	100.675	2722.62	55.8333	2681.61	178.071	2652.73	64.0375	2695.04	190.018	2692.1	229.938	2707.01	60.325
2774.72	12.2736	2746.92	24.6494	2724.14	39.75	2729.31	31.375	2716.71	38.8796	2713.5	56.7955	2721.18	44.6667	2729.53	45.0714	2741.3	87.7857	2734.81	30.4286	2707.49	60.35	2702.09	86.775	2724.25	51.1667	2683.25	172.929	2654.38	73.0375	2696.67	166.571	2693.74	199.125	2708.64	54.9125
2776.34	12.1307	2748.55	22.7471	2725.76	36.375	2730.94	28.7	2718.34	36.6759	2715.13	51.5341	2722.81	41.6667	2731.16	47.0238	2742.92	86.8125	2736.44	27.7411	2709.12	57.525	2703.72	77.125	2725.88	47.75	2684.89	171.571	2656.02	83.2625	2698.31	143.75	2695.37	178.854	2710.27	49.6375
2777.95	11.7447	2750.17	21.5	2727.39	34.5	2732.56	27.875	2719.97	34.7315	2716.76	47.1023	2724.43	35.9048	2732.79	44.5238	2744.55	83.5625	2738.07	26.5804	2710.75	53.625	2705.35	67.675	2727.51	46.3333	2686.52	163.643	2657.67	95.75	2699.94	122.339	2697.01	153.104	2711.9	44.15
2779.57	12.2188	2751.79	23.5575	2729.02	33.75	2734.19	27.175	2721.6	30.1852	2718.39	43.75	2726.06	34.5238	2734.41	39.119	2746.17	82.0714	2739.69	23.7768	2712.38	49.775	2706.99	59.725	2729.13	46.25	2688.16	145.571	2659.31	109.562	2701.58	110.464	2698.64	133.125	2713.54	37.775
2781.19	11.9362	2753.41	21.8966	2730.65	32.6875	2735.81	26.15	2723.22	29.0648	2720.02	39.8636	2727.69	32.9286	2736.04	36.0476	2747.79	83.0446	2741.32	24.1786	2714.01	44.95	2708.62	58.075	2730.76	44.5	2689.8	128.5	2660.95	126.688	2703.21	98.5536	2700.28	118.042	2715.17	39.2375
2782.8	12.2644	2755.04	20.431	2732.27	24.5	2737.44	24.45	2724.85	29.0648	2721.65	35.9432	2729.32	30.619	2737.66	37.4286	2749.42	81.9821	2742.94	22.1429	2715.64	43.85	2710.25	54.725	2732.39	40.5833	2691.43	124.571	2662.59	148.438	2704.84	87.5357	2701.91	104.792	2716.8	37.1125
2784.42	11.9635	2756.66	20.8448	2733.9	27.75	2739.07	22.775	2726.48	25.9815	2723.28	34.7045	2730.94	30.2619	2739.29	36.6429	2751.04	78.3661	2744.56	21.3304	2717.27	40.45	2711.88	45.925	2734.01	34.5833	2693.07	121.143	2664.23	168.963	2706.47	75.6607	2703.54	90.6042	2718.43	33.825
2786.03	12.6018	2758.28	20.046	2735.53	30.3125	2740.69	20.375	2728.11	24.3426	2724.91	35.2159	2732.57	29.4048	2740.91	36.7857	2752.66	78.4018	2746.19	19.6161	2718.9	37.25	2713.51	46.95	2735.64	38.1667	2694.7	111.143	2665.88	196.688	2708.11	68.9643	2705.18	77.7708	2720.06	31.7875
2787.65	11.6717	2759.9	20.2931	2737.15	27.375	2742.31	18.85	2729.74	22.9074	2726.54	32.2727	2734.2	26.0238	2742.54	33.0238	2754.28	76.7054	2747.81	21.2679	2720.53	35.1	2715.14	42.975	2737.26	33.5833	2696.34	92.7857	2667.52	224.963	2709.74	64.8929	2706.81	70.2708	2721.68	31.475
2789.26	11.9818	2761.52	20.3736	2738.78	29.4375	2743.94	21.1	2731.36	23.5463	2728.16	29.2386	2735.82	26.0238	2744.16	29.9286	2755.9	76.4286	2749.43	19.9107	2722.16	31.25	2716.77	40.225	2738.89	32	2697.97	90.8571	2669.16	251.812	2711.37	55.125	2708.44	62.9167	2723.31	28.8
2790.88	11.8906	2763.14	17.0115	2740.4	26.875	2745.56	19.975	2732.99	21.537	2729.79	27.0795	2737.45	24.0714	2745.79	31.7143	2757.52	74.1696	2751.06	19.3661	2723.79	30.65	2718.4	34.425	2740.52	32.25	2699.61	81.4286	2670.8	288.738	2713	50.7321	2710.07	58.25	2724.94	24.8625
2792.49	12.0456	2764.76	20.0057	2742.03	22.8125	2747.19	16.875	2734.62	21.3981	2731.42	26.8523	2739.07	21.5238	2747.41	32.0476	2759.15	73.5625	2752.68	18.0179	2725.42	32.55	2720.03	32.075	2742.14	33.4167	2701.24	82.6429	2672.44	312.025	2714.63	45.9643	2711.7	52.2708	2726.57	24.8625
2794.1	11.3313	2766.38	18.8563	2743.65	27.5	2748.81	18.525	2736.24	18.7963	2733.04	25.25	2740.7	24.8333	2749.03	25.9524	2760.77	73.4375	2754.3	17.5893	2727.04	27.775	2721.66	34.3	2743.76	32.1667	2702.87	72.8571	2674.08	335.6	2716.26	42.0536	2713.33	46.5833	2728.2	24.45
2795.72	11.9544	2768	19.1494	2745.27	22.625	2750.43	17.075	2737.87	17.3056	2734.67	23.3295	2742.32	23.2381	2750.66	24.2381	2762.39	74.2143	2755.92	16.8125	2728.67	26.55	2723.29	29.025	2745.39	24.75	2704.5	71.5	2675.72	353.775	2717.89	37.5179	2714.96	46.6875	2729.82	19.775
2797.33	12.0213	2769.62	18.6494	2746.9	19.8125	2752.05	17.625	2739.49	16.6667	2736.3	24.0455	2743.95	22.7619	2752.28	29.5476	2764.01	75.5268	2757.54	16.9196	2730.3	26.05	2724.92	27.2	2747.01	25.25	2706.14	70.4286	2677.36	359.012	2719.52	34.625	2716.59	42.0833	2731.45	21.5375
2798.94	11.693	2771.23	18.5345	2748.52	24.125	2753.68	13.075	2741.12	17.3519	2737.92	22.7841	2745.57	21.4524	2753.9	25.5952	2765.63	73.9375	2759.16	17.0357	2731.93	22.2	2726.54	26.25	2748.63	27.4167	2707.77	63.8571	2678.99	358.625	2721.15	33.0179	2718.22	41.125	2733.08	20.7625
2800.55	11.1277	2772.85	19.5862	2750.14	22.8125	2755.3	19.75	2742.74	15.5926	2739.55	22.4659	2747.19	20.7619	2755.52	27.6429	2767.24	72.2411	2760.78	15.75	2733.55	22.825	2728.17	23.625	2750.26	23.9167	2709.4	61.7143	2680.63	350.975	2722.78	29.0536	2719.85	34.0833	2734.7	18.2875
2802.16	11.4043	2774.47	19.0345	2751.77	23	2756.92	15.35	2744.37	16.5093	2741.17	20.1023	2748.82	20.5476	2757.14	24.6429	2768.86	72.7679	2762.4	17.0536	2735.18	23.625	2729.8	25.6	2751.88	22.9167	2711.03	62.9286	2682.27	336.938	2724.41	28.125	2721.48	32.2708	2736.33	16.6375
2803.77	11.3252	2776.09	17.3448	2753.39	19.4375	2758.54	16.175	2745.99	15.7407	2742.8	20.1136	2750.44	18.0238	2758.76	25.7857	2770.48	72.3036	2764.02	17.0804	2736.8	21.275	2731.43	21.375	2753.5	17.25	2712.66	58.7857	2683.91	316.65	2726.04	25.0179	2723.11	31.625	2737.96	17.975
2805.39	12.2219	2777.7	19.0172	2755.01	23.5625	2760.16	14.75	2747.61	15.7222	2744.42	18.3977	2752.06	23.381	2760.38	25.119	2772.1	71.3661	2765.64	15.9821	2738.43	23.425	2733.05	20.25	2755.12	17.0833	2714.29	60.2143	2685.54	292.1	2727.66	25.3929	2724.74	27.7292	2739.58	18.65
2807	11.2462	2779.32	18.5747	2756.63	19.5625	2761.78	14.9	2749.24	14.8426	2746.04	18.5682	2753.68	18.3571	2762	21.0952	2773.72	71.1696	2767.26	15	2740.05	18.65	2734.68	21.525	2756.74	23.6667	2715.92	50.2143	2687.18	270.837	2729.29	22.8214	2726.37	27.9792	2741.21	15.25
2808.61	11.5319	2780.94	19.0402	2758.25	19.9375	2763.4	16.375	2750.86	15.0278	2747.67	18.0341	2755.31	20.2143	2763.62	23.7619	2775.33	75.3571	2768.88	14.4821	2741.68	19.55	2736.3	18.85	2758.37	24.0833	2717.55	52.6429	2688.82	243.65	2730.92	24.8036	2728	26.3125	2742.83	16.9
2810.22	11.1884	2782.55	16.9885	2759.87	22.0625	2765.02	14.6	2752.48	14.9815	2749.29	17.75	2756.93	19.9048	2765.24	23.9762	2776.95	71.2321	2770.5	14.3036	2743.3	18.725	2737.93	19.325	2759.99	16.4167	2719.18	51.0714	2690.45	219.725	2732.54	21.4821	2729.62	24.2083	2744.45	15.125
2811.83	11.9666	2784.17	17.0517	2761.49	23.375	2766.64	15.3	2754.1	13.3056	2750.91	16.4886	2758.55	18.7619	2766.86	22.381	2778.57	70.0446	2772.12	14.3393	2744.93	15.925	2739.56	17.825	2761.61	18.75	2720.81	47.7857	2692.09	193.95	2734.17	22.5893	2731.25	22.9583	2746.08	14.5625
2813.43	11.5258	2785.78	19.046	2763.11	17.5625	2768.26	15	2755.73	11.3241	2752.54	17.1818	2760.17	17.619	2768.48	22.7619	2780.18	70.4911	2773.74	14.1339	2746.55	14.075	2741.18	17.8	2763.23	13.75	2722.44	43.5	2693.72	172.65	2735.8	19.0714	2732.88	20.3542	2747.7	14.3125
2815.04	11.7234	2787.4	18.069	2764.73	16.5625	2769.88	15.125	2757.35	14.6852	2754.16	16.6364	2761.79	19.2857	2770.1	23.8571	2781.8	70.4643	2775.35	13.5357	2748.17	17.275	2742.8	16.875	2764.85	19.6667	2724.07	44	2695.36	153.537	2737.42	18.7857	2734.5	20.4583	2749.32	15.8625
2816.65	11.1945	2789.01	16.431	2766.35	19	2771.5	16.6	2758.97	14.3148	2755.78	15.9773	2763.41	16.5714	2771.72	21.2857	2783.42	72.9375	2776.97	14.2143	2749.8	15.275	2744.43	14.6	2766.47	15.5	2725.7	47.8571	2696.99	134.775	2739.05	16.9643	2736.13	19.2292	2750.95	12.925
2818.26	10.9848	2790.63	17.2759	2767.97	14.5625	2773.11	14.4	2760.59	12.9444	2757.4	15.6818	2765.03	16.619	2773.34	19.5	2785.03	72.6429	2778.59	13.4196	2751.42	14.1	2746.05	16.625	2768.08	14	2727.33	40.7857	2698.63	115.3	2740.67	17.6429	2737.75	18.5	2752.57	10.85
2819.87	11.2827	2792.24	16.9425	2769.59	16.75	2774.73	14.025	2762.21	12.1389	2759.02	14.7386	2766.65	14.6429	2774.95	18.8333	2786.64	72.25	2780.2	14.7589	2753.04	14.225	2747.68	15	2769.7	14.25	2728.95	38.0714	2700.26	101.263	2742.3	18.3571	2739.38	17.3125	2754.19	12.925
2821.47	11.4377	2793.85	16.9023	2771.21	16.8125	2776.35	14.4	2763.83	13.4907	2760.64	15.0114	2768.27	16.6429	2776.57	20.6429	2788.26	72.9196	2781.82	13.9196	2754.66	15.4	2749.3	16.25	2771.32	19.3333	2730.58	30.8571	2701.89	89.3125	2743.92	18.3214	2741	21.2083	2755.81	11.1125
2823.08	10.5228	2795.46	17.5287	2772.83	19.5625	2777.97	15.3	2765.45	12.463	2762.26	14.7386	2769.88	16.2381	2778.19	22.2857	2789.87	70.8304	2783.43	13.5982	2756.29	13.85	2750.92	13.5	2772.94	12.9167	2732.21	36.5	2703.53	81.625	2745.54	14.6786	2742.63	17.7917	2757.43	12.425
2824.69	11.0456	2797.08	15.5172	2774.44	18.0625	2779.58	14.2	2767.07	12.287	2763.88	16.1932	2771.5	16.9524	2779.8	21.2381	2791.49	71.4554	2785.05	13.4018	2757.91	14.325	2752.54	14.9	2774.56	15.4167	2733.83	37.3571	2705.16	71.9625	2747.17	16.3036	2744.25	16.7292	2759.05	13.0875
2826.29	10.8328	2798.69	17.1494	2776.06	20.0625	2781.2	12.625	2768.69	12.9907	2765.5	15.3182	2773.12	17.8095	2781.42	21.1667	2793.1	73.2143	2786.66	14	2759.53	15.05	2754.17	11.075	2776.17	17.5833	2735.46	30.4286	2706.79	64.75	2748.79	14.4107	2745.88	15.9375	2760.67	13.6375
2827.9	11.4559	2800.3	17.7586	2777.68	17.875	2782.81	13.75	2770.3	12.0926	2767.12	13.8977	2774.74	13.7857	2783.03	22.8333	2794.71	70.6875	2788.28	13.4464	2761.15	13.675	2755.79	13.825	2777.79	11	2737.09	33.7857	2708.42	60.425	2750.41	16.8571	2747.5	14.9375	2762.29	11.1
2829.51	9.6231	2801.91	15.7529	2779.3	15.625	2784.43	12.675	2771.92	12.1667	2768.74	13.8523	2776.35	14.7619	2784.65	23.381	2796.33	73.6429	2789.89	13.5804	2762.77	13.425	2757.41	12.7	2779.41	15	2738.71	28.3571	2710.06	55.6	2752.04	11.4107	2749.12	14.75	2763.91	10.675
2831.11	10.772	2803.52	17.9828	2780.91	12	2786.04	13.35	2773.54	12.3981	2770.36	14.4773	2777.97	15.0714	2786.26	23.9286	2797.94	71.375	2791.51	13.2768	2764.39	13.4	2759.03	11.25	2781.02	13.3333	2740.34	27	2711.69	49.975	2753.66	13.2321	2750.75	13.7292	2765.53	11.925
2832.72	10.2371	2805.13	16.2414	2782.53	15.875	2787.66	11.725	2775.16	12.5556	2771.98	13.5909	2779.59	16.4762	2787.88	21.4762	2799.55	71.5536	2793.12	12.9107	2766.01	13.825	2760.65	12.325	2782.64	10.75	2741.96	18.7143	2713.32	45.4625	2755.28	13.9643	2752.37	14.5417	2767.15	12.3375
2834.32	10.5805	2806.75	16.7356	2784.14	18.3125	2789.27	12.025	2776.77	12.0648	2773.59	12.6023	2781.2	17.9524	2789.49	18.7381	2801.16	70.2857	2794.73	12.5536	2767.63	12.9	2762.27	9.775	2784.25	14.3333	2743.59	21.3571	2714.95	41.8875	2756.9	14.3036	2753.99	15.8958	2768.77	10.875
2835.92	10.8328	2808.36	17.2471	2785.76	13.5625	2790.89	11.575	2778.39	11.4815	2775.21	13.3636	2782.82	15.5238	2791.11	20.0714	2802.77	70.0982	2796.34	13.3571	2769.24	11.475	2763.89	10.35	2785.87	14.3333	2745.21	17.5714	2716.58	40.6125	2758.52	11.6964	2755.61	15.625	2770.39	12.1875
2837.53	10.5805	2809.97	16.046	2787.37	19	2792.5	13.9	2780.01	12.6574	2776.83	11.25	2784.43	15	2792.72	20.3095	2804.38	71.9464	2797.96	12.3482	2770.86	12.175	2765.51	12.125	2787.48	8.83333	2746.83	22.6429	2718.21	34.7875	2760.14	13.3571	2757.23	16.0625	2772.01	12.225
2839.13	10.3891	2811.57	16.8506	2788.99	15.8125	2794.11	13.625	2781.62	11.4444	2778.44	14.4773	2786.05	15.4524	2794.33	19.5952	2806	70.9375	2799.57	13.2321	2772.48	12	2767.13	10.025	2789.1	15	2748.46	14.6429	2719.84	33.7875	2761.76	13.3393	2758.85	15.25	2773.63	10.35
2840.73	10.5623	2813.18	16.7816	2790.6	15.375	2795.73	11.55	2783.24	12.5	2780.06	13.9205	2787.66	18.381	2795.95	22.0952	2807.61	71.1607	2801.18	12.6875	2774.1	12.25	2768.75	13.275	2790.71	15.25	2750.08	17.6429	2721.47	32.3625	2763.38	13.4286	2760.47	15.5	2775.24	10.0375
2842.34	10.3556	2814.79	14.5862	2792.21	13.3125	2797.34	13.2	2784.85	13.5278	2781.68	12.4205	2789.28	14.6429	2797.56	20.3095	2809.22	72.0446	2802.79	14.0089	2775.72	12.8	2770.36	9.375	2792.33	12.0833	2751.7	17.8571	2723.1	31.55	2765	14.0179	2762.09	14.9375	2776.86	11.6
2843.94	10.6444	2816.4	17.3448	2793.83	18.5	2798.95	13.025	2786.47	11.0463	2783.29	14.7159	2790.89	17.4524	2799.17	18.8095	2810.82	71.7143	2804.4	13.2321	2777.33	11.8	2771.98	11.125	2793.94	15.5833	2753.32	14.5714	2724.72	28.65	2766.62	10.9107	2763.71	12	2778.48	10.15
2845.54	9.92097	2818.01	15.9885	2795.44	15	2800.56	14.9	2788.08	12.25	2784.91	13.1023	2792.51	16.381	2800.78	20.1667	2812.43	71.8482	2806.01	12.1339	2778.95	11.125	2773.6	9.775	2795.55	15.25	2754.94	15.0714	2726.35	27.5	2768.24	12.9107	2765.33	15.2083	2780.09	10.25
2847.14	10.8024	2819.62	16.0805	2797.05	15.375	2802.17	11.75	2789.7	11.6481	2786.52	11.8636	2794.12	13.6667	2802.39	18.5476	2814.04	71.5982	2807.62	12.8125	2780.57	12.725	2775.22	10.725	2797.16	11.25	2756.57	13.7857	2727.98	26.025	2769.86	13.1071	2766.95	15.8125	2781.71	11.3375
2848.74	9.53799	2821.22	15.4943	2798.67	18.4375	2803.78	9.3	2791.31	11.8056	2788.14	12.6136	2795.73	15.2619	2804	17.9762	2815.65	71.7321	2809.23	13.0446	2782.18	11.2	2776.83	8.4	2798.78	15.25	2758.19	11.8571	2729.61	24.95	2771.48	9.94643	2768.57	14.2083	2783.32	10.6375
2850.34	10.3891	2822.83	14.7644	2800.28	12.5625	2805.4	10.675	2792.93	12.25	2789.75	11.4432	2797.34	15.4048	2805.61	18.0476	2817.26	71.2857	2810.84	12.2679	2783.8	13.3	2778.45	9.825	2800.39	14.6667	2759.81	15.9286	2731.24	21.35	2773.1	12.6786	2770.19	12.125	2784.94	9.0625
2851.95	10.3526	2824.44	16.4483	2801.89	16.375	2807.01	12.5	2794.54	9.39815	2791.37	12.6136	2798.96	16.8333	2807.22	17.5952	2818.87	70.6339	2812.45	12.125	2785.41	11	2780.07	8.825	2802	11.9167	2761.43	9.14286	2732.86	23.05	2774.71	12.3214	2771.81	11.4375	2786.55	10.3625
2853.55	10.2523	2826.04	15.7874	2803.5	14.5	2808.62	11.4	2796.15	10.75	2792.98	11.1023	2800.57	14.8571	2808.83	17.7857	2820.47	73.0179	2814.06	12.4732	2787.03	10.975	2781.68	8.475	2803.61	13.0833	2763.05	6.57143	2734.49	20.625	2776.33	12.4464	2773.43	12.4167	2788.17	11.0625
2855.15	9.97264	2827.65	15.6092	2805.11	13.75	2810.23	9.575	2797.76	9.66667	2794.59	13	2802.18	14.9048	2810.44	18.8333	2822.08	70.75	2815.67	12.2768	2788.64	12.55	2783.3	10.35	2805.22	12.4167	2764.67	19.1429	2736.11	20.05	2777.95	10.5893	2775.04	12.4792	2789.78	11.7125
2856.75	10.614	2829.25	15.3736	2806.72	12.125	2811.83	11.3	2799.38	10.6019	2796.2	13.9091	2803.79	14.9762	2812.05	17.8571	2823.69	70.6161	2817.28	11.9375	2790.25	12.875	2784.91	9.375	2806.83	16.8333	2766.29	10.8571	2737.74	19.3875	2779.56	12.1429	2776.66	13.0208	2791.4	8.4375
2858.34	10.1611	2830.86	15.6609	2808.33	18.75	2813.44	11.675	2800.99	11.3611	2797.82	13.2955	2805.4	13.0476	2813.66	17.5476	2825.29	71.8482	2818.88	13.375	2791.87	12.9	2786.53	10.325	2808.44	12.5	2767.91	10.6429	2739.36	19.525	2781.18	12.0179	2778.28	11.3125	2793.01	11.7375
2859.94	10.0729	2832.46	15.8046	2809.94	17.625	2815.05	13.85	2802.6	11.0741	2799.43	12.5795	2807.01	15.6905	2815.27	17.3333	2826.9	71.0179	2820.49	12.2946	2793.48	12.3	2788.14	9.625	2810.05	17.3333	2769.52	10.9286	2740.99	18.8375	2782.79	12.9286	2779.89	13.7708	2794.62	10.0125
2861.54	9.93921	2834.07	15.7644	2811.55	14.375	2816.66	12.15	2804.21	10.1574	2801.04	12.3636	2808.62	14	2816.88	18.5476	2828.51	70.7232	2822.1	13.1607	2795.09	10.95	2789.76	8.125	2811.66	11.6667	2771.14	12.1429	2742.61	18.2625	2784.41	10.5	2781.51	12.1458	2796.24	9.825
2863.14	10.2158	2835.67	14.4138	2813.16	9.875	2818.27	11.575	2805.82	10.537	2802.65	13.7955	2810.23	13.619	2818.49	19.2619	2830.11	73.0357	2823.71	12.8839	2796.71	11.825	2791.37	10.775	2813.27	13.6667	2772.76	12.7857	2744.24	18.125	2786.02	10.375	2783.13	13.2708	2797.85	10.825
2864.74	9.87234	2837.28	14.6494	2814.77	19.875	2819.88	12.075	2807.43	11.0648	2804.26	10.8636	2811.84	13.1905	2820.09	17.7857	2831.72	69.8661	2825.31	13.2411	2798.32	10.8	2792.98	8.225	2814.88	11.5833	2774.38	11.4286	2745.86	17.3375	2787.64	10.4821	2784.74	11.7708	2799.46	12.1375
2866.34	10.386	2838.88	15.7471	2816.38	15.1875	2821.48	14.1	2809.04	10.9259	2805.87	13.4886	2813.45	15.3571	2821.7	17.1905	2833.32	70.8839	2826.92	10.6339	2799.93	12.725	2794.6	8.825	2816.49	17.25	2776	9.85714	2747.49	16.775	2789.25	11.75	2786.36	11.25	2801.07	8.9125
2867.93	9.65957	2840.48	14.2586	2817.98	14.3125	2823.09	11.7	2810.65	11.0278	2807.48	13.6818	2815.06	15.7619	2823.31	16.0952	2834.93	70.25	2828.52	10.9464	2801.54	12.35	2796.21	9.05	2818.1	15.1667	2777.61	11.3571	2749.11	17.2625	2790.87	12.1964	2787.97	9.64583	2802.68	9.925
2869.53	9.96049	2842.09	16.6897	2819.59	13.25	2824.7	9.975	2812.26	10.2963	2809.09	12.4545	2816.67	15.0952	2824.91	17.6667	2836.53	71.8482	2830.13	13.3929	2803.15	11.65	2797.82	10.2	2819.7	12.3333	2779.23	10.6429	2750.73	15.675	2792.48	12.1964	2789.58	10.5417	2804.29	10.9125
		2843.69	14.6207	2821.2	13.0625	2826.3	11.4	2813.87	9.55556	2810.7	10.9659	2818.27	15.4286	2826.52	15.881	2838.13	70.9464	2831.73	11.125	2804.77	10.575	2799.43	10.025	2821.31	12.5	2780.84	9.14286	2752.35	13.8	2794.09	9.64286	2791.2	9.95833	2805.91	11.0125
		2845.29	15.7356	2822.81	15.625	2827.91	11.4	2815.48	10.0833	2812.31	12.3295	2819.88	15.4048	2828.13	17.4762	2839.74	69.2946	2833.34	10.8661	2806.38	9.125	2801.05	8.35	2822.92	16.4167	2782.46	9.42857	2753.98	15.0625	2795.71	11.8929	2792.81	11.7083	2807.52	9.3
		2846.89	15.2816	2824.41	10.8125	2829.51	11.6	2817.09	10.4167	2813.92	13.0341	2821.49	16.381	2829.73	17.9048	2841.34	70.9643	2834.94	13.75	2807.99	9.95	2802.66	9.825	2824.52	14.0833	2784.08	7.85714	2755.6	16.375	2797.32	11.3036	2794.42	11.125	2809.13	11.55
		2848.49	14.6609	2826.02	12.5625	2831.12	13.7	2818.69	12.3519	2815.53	12.7727	2823.1	17.9524	2831.34	16.9286	2842.94	73.1696	2836.55	10.3571	2809.6	12.525	2804.27	12.075	2826.13	13.25	2785.69	11.5	2757.22	13.9875	2798.93	11.75	2796.04	10.3958	2810.73	10.4125
		2850.09	14.7586	2827.63	12.4375	2832.72	11.7	2820.3	10.6574	2817.14	12.8295	2824.7	11.4048	2832.94	14.5238	2844.54	71.5	2838.15	12.4107	2811.21	8.7	2805.88	10.975	2827.74	10.6667	2787.31	5.14286	2758.84	12.85	2800.54	10.9464	2797.65	9	2812.34	7.525
		2851.7	15.7874	2829.23	14.3125	2834.33	10.275	2821.91	11.3148	2818.75	12.8182	2826.31	15.619	2834.55	19.2619	2846.14	73.4107	2839.75	11.25	2812.81	9.675	2807.49	12.075	2829.34	11.8333	2788.92	9.28571	2760.46	15.85	2802.15	11.6429	2799.26	11.125	2813.95	10.475
		2853.3	14.9253	2830.84	15.375	2835.93	13.45	2823.51	12.037	2820.35	12.5114	2827.91	11.8333	2836.15	17.5476	2847.75	74.6429	2841.36	12.2321	2814.42	11.575	2809.1	9.35	2830.95	8.25	2790.53	8.14286	2762.08	12.55	2803.77	11.625	2800.87	12.5625	2815.56	10.525
		2854.9	15.6034	2832.44	16.875	2837.54	9.8	2825.12	10.8611	2821.96	12.3068	2829.52	12.2143	2837.75	14.0714	2849.35	72.2232	2842.96	11.2054	2816.03	10.025	2810.71	9.3	2832.55	17.1667	2792.15	10.9286	2763.7	14.2125	2805.38	10.3393	2802.49	10.8125	2817.17	9.1
		2856.49	14.1667	2834.05	12.5625	2839.14	10.9	2826.73	10.6204	2823.57	12.7955	2831.12	13.6429	2839.36	14.3333	2850.95	73.1518	2844.56	12.4821	2817.64	9	2812.32	9.475	2834.16	14	2793.76	8.21429	2765.32	14.1	2806.99	10.3929	2804.1	10.0417	2818.78	8.6625
		2858.09	16.3793	2835.65	10.875	2840.74	11.875	2828.33	9.33333	2825.17	10.6136	2832.73	14.4286	2840.96	17.8333	2852.55	73.75	2846.16	11.5714	2819.25	9.05	2813.93	8.675	2835.76	12.0833	2795.37	5.85714	2766.94	13.7	2808.6	11.4286	2805.71	10.25	2820.38	11.5375
		2859.69	15.0345	2837.25	13.125	2842.35	11.35	2829.94	9.30556	2826.78	12.3409	2834.33	14.1429	2842.56	16.5714	2854.15	73.4018	2847.76	12.0625	2820.85	9	2815.54	8.4	2837.36	13.5	2796.99	6.28571	2768.56	12.5625	2810.21	10.3929	2807.32	12.25	2821.99	9.975
[truncated: 90 more rows]

## Sheet: Figure S3
F1				F2				F3				F4				F5				F6				F7
[truncated: 1,041 more rows]

## Sheet: Figure S4
C1		C2		C3		C4		C5		C6		C7		C8		C9		F1		F2		F3		F4		F5		F6		F7
[truncated: 385 more rows]

[truncated: 2 more sheets: Figure S5, Figure S6]
